# Supplementary material
Source: MDPI journal article supplement (https://www.mdpi.com/2075-163X/12/2/128)

Supplementary material S4 for the following article:

**Petrography of the intrusive rocks at the diorite-hosted Regnault Au mineralization**

**by L. Mathieu, F. MacDonald**

Journal: MDPI – Minerals

**Information.** Diorite and other samples observed in natural and reflected light.  
This document contains images that complete Figure 5.

Dacite samples

2.5 cm

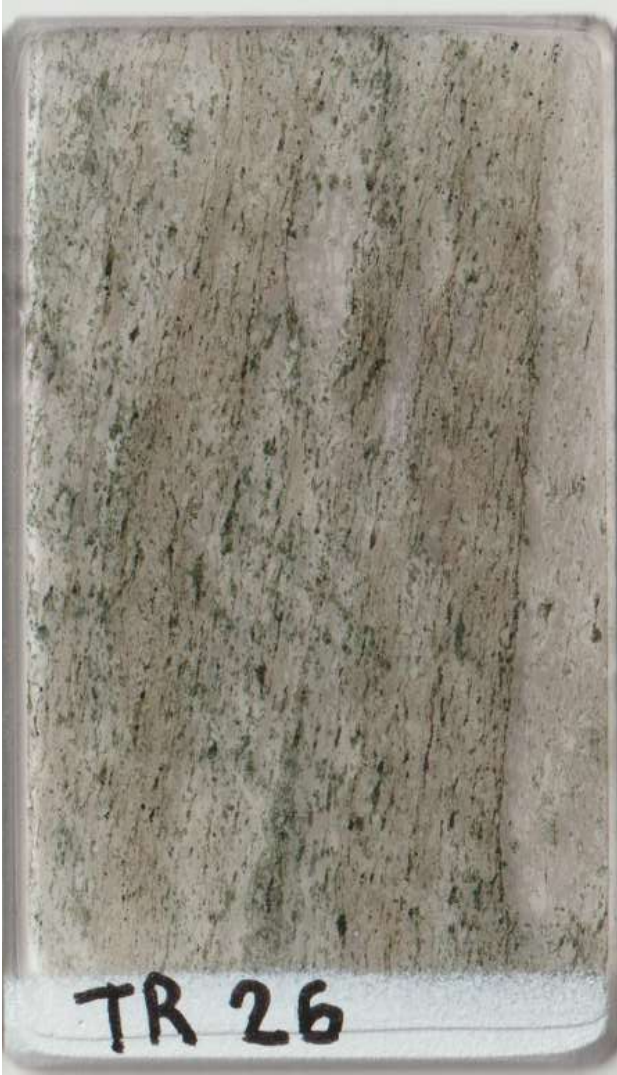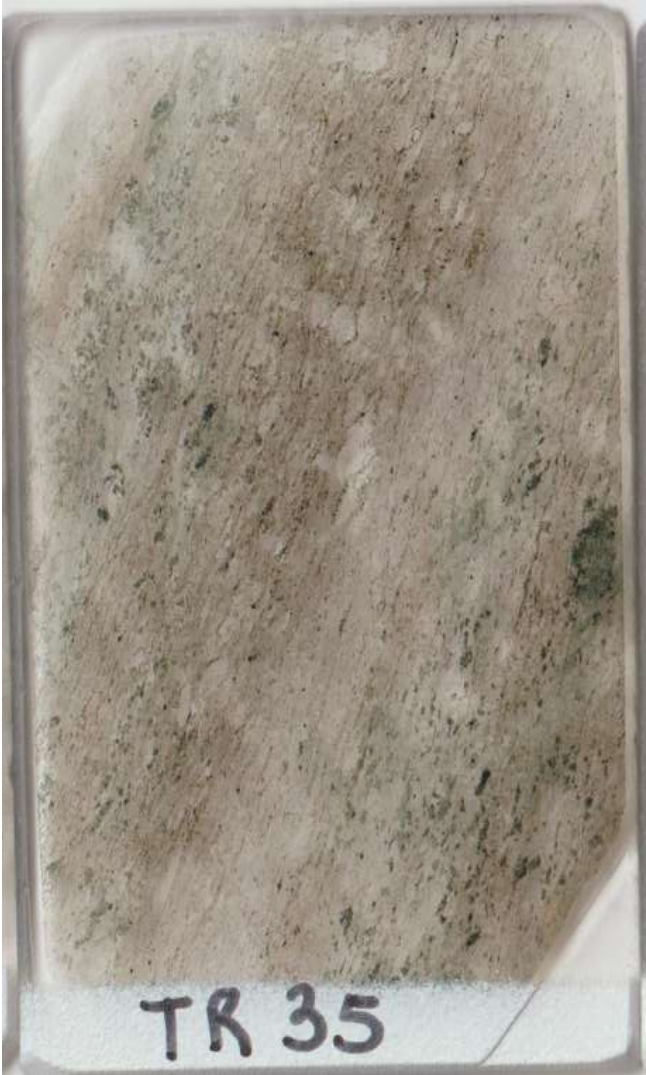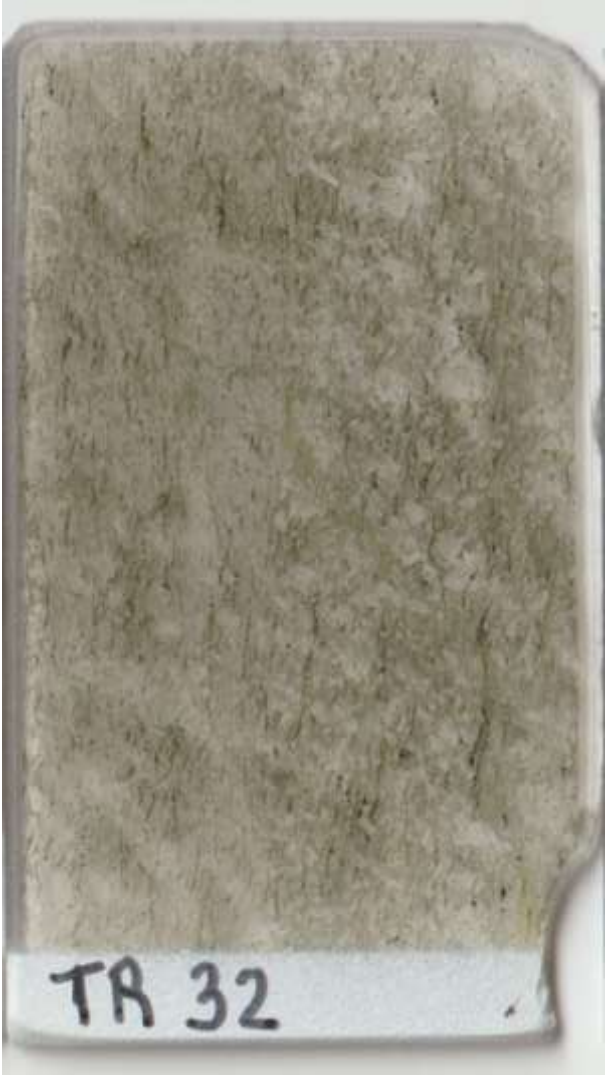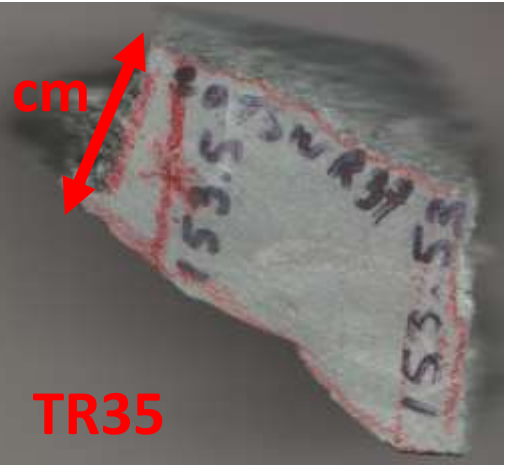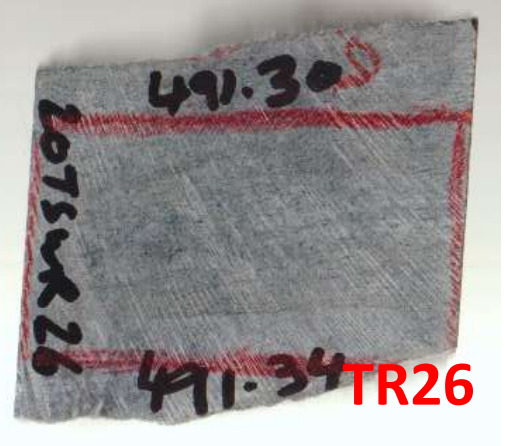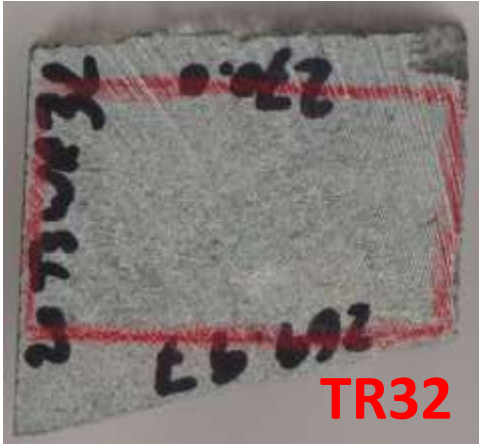

Thin sections (scanned)

Hand samples



Andesite samples

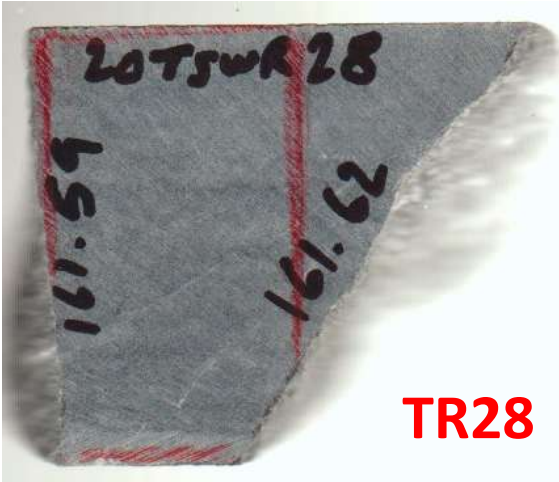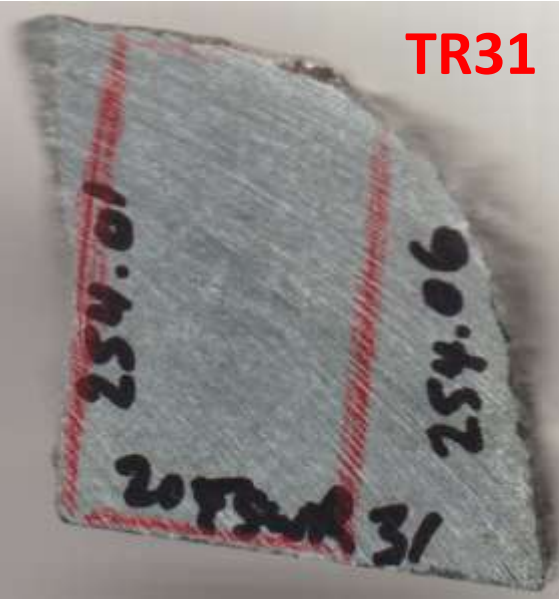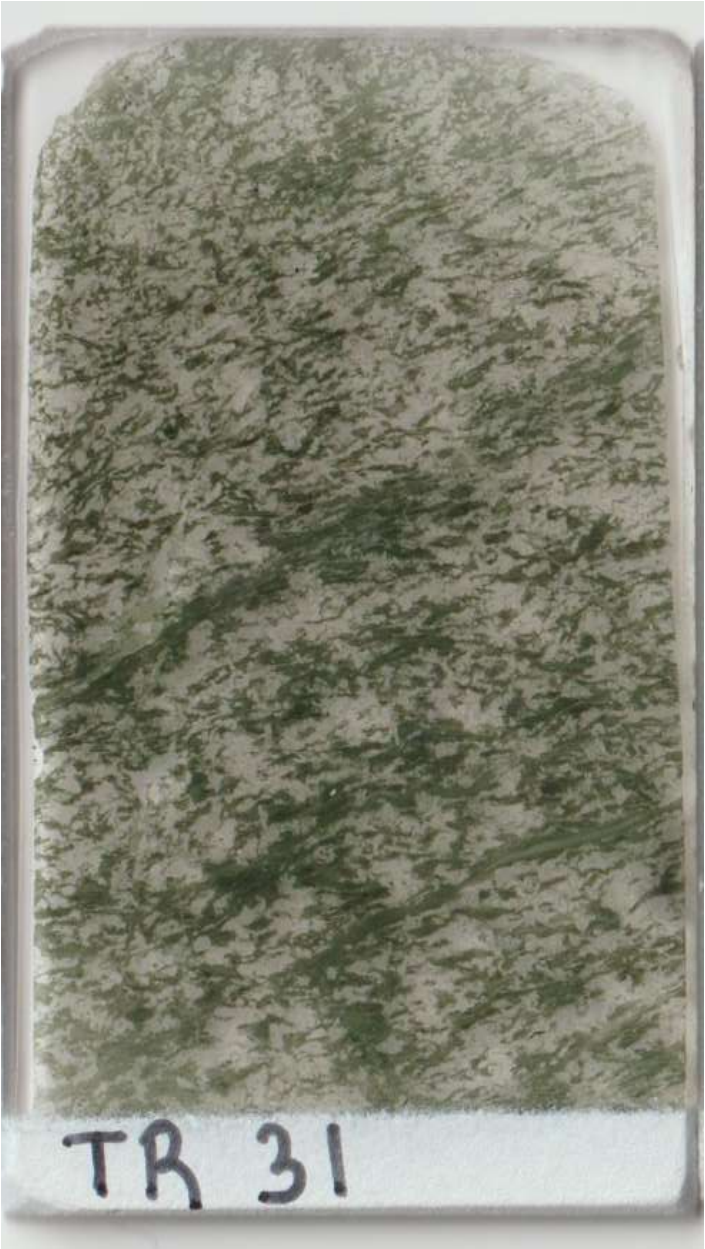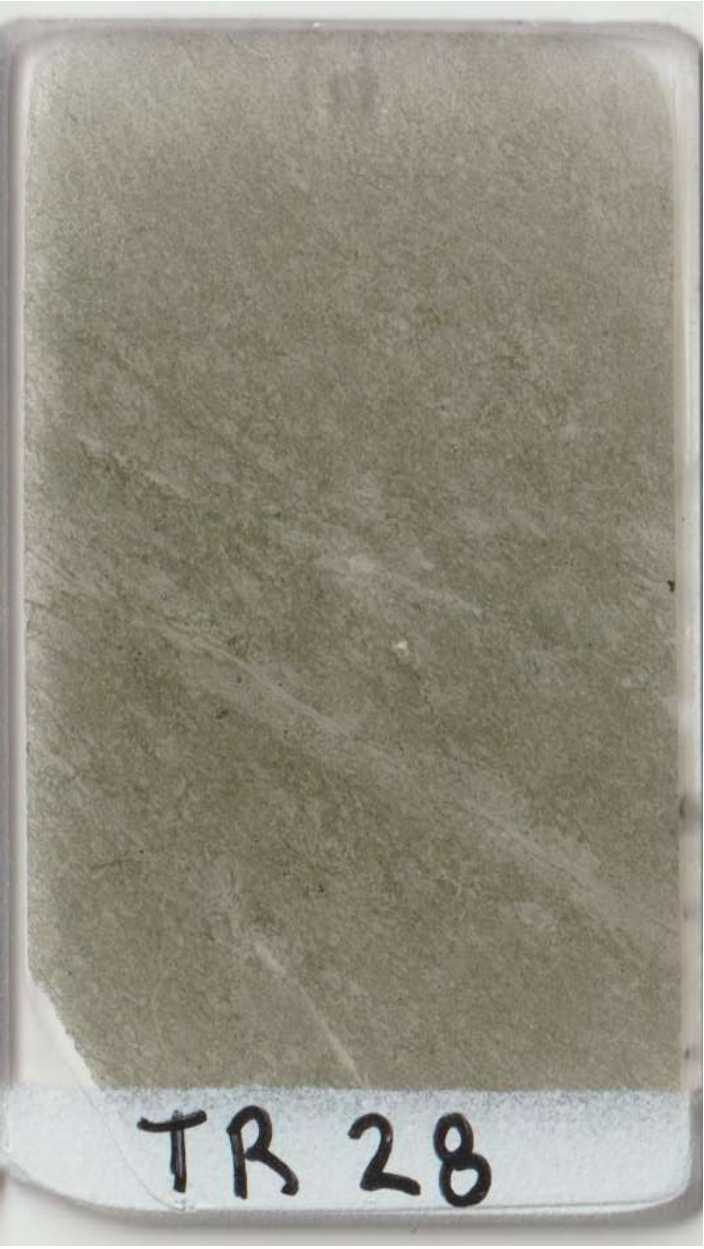



Phase 2 samples

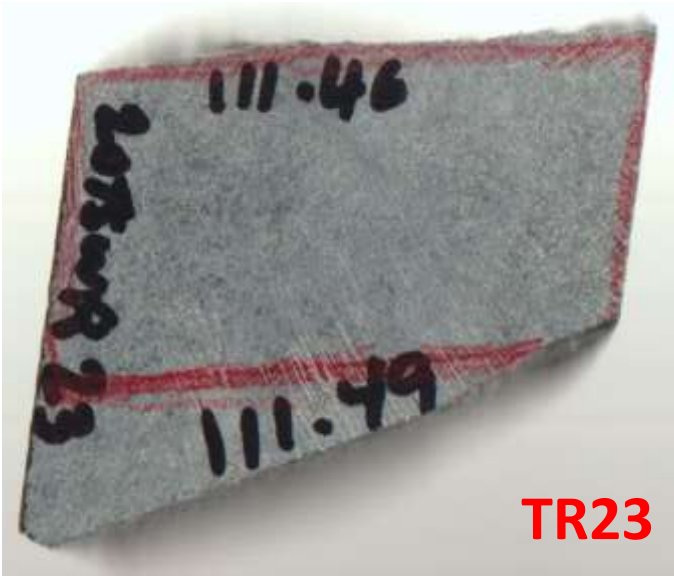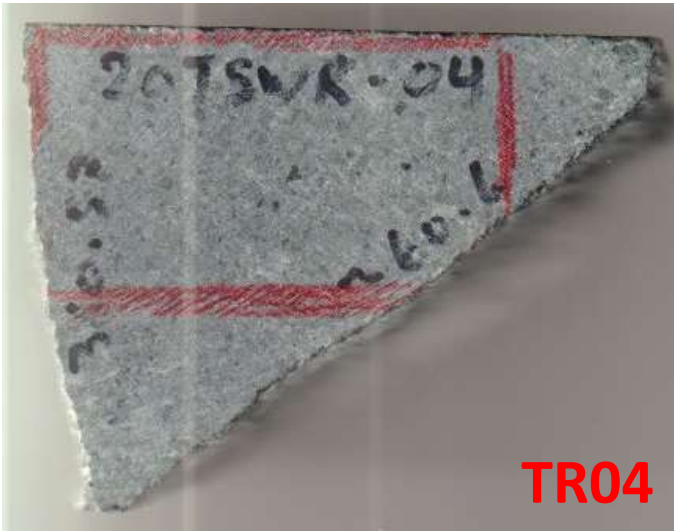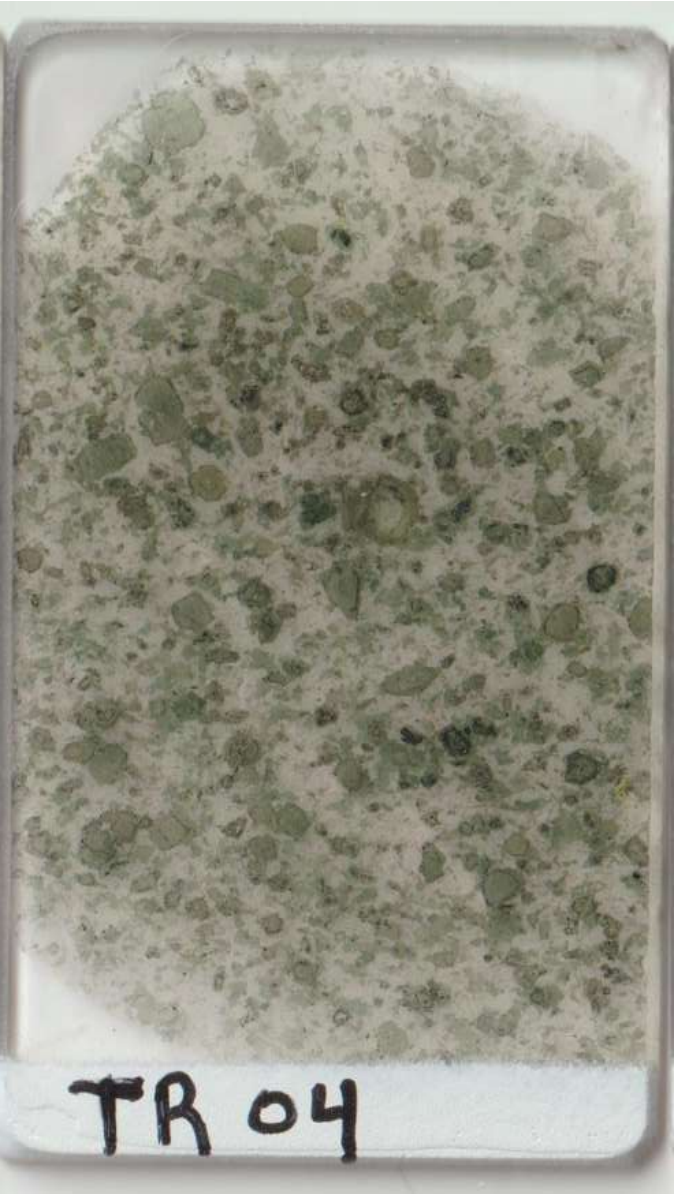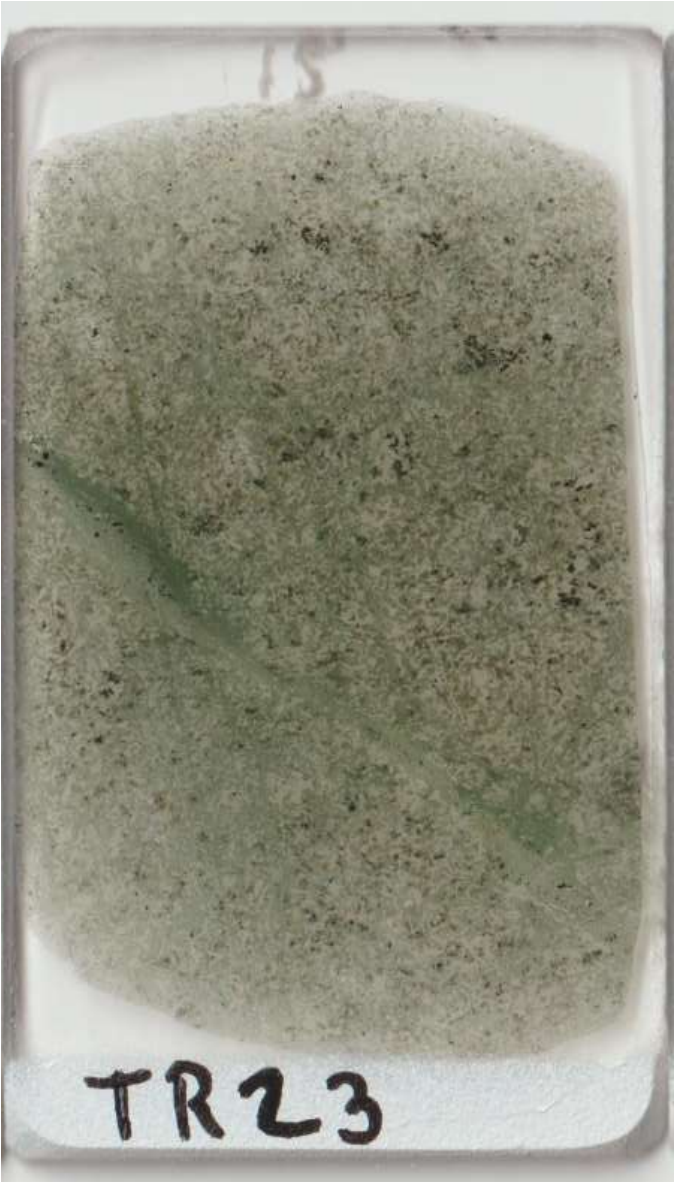



TR23

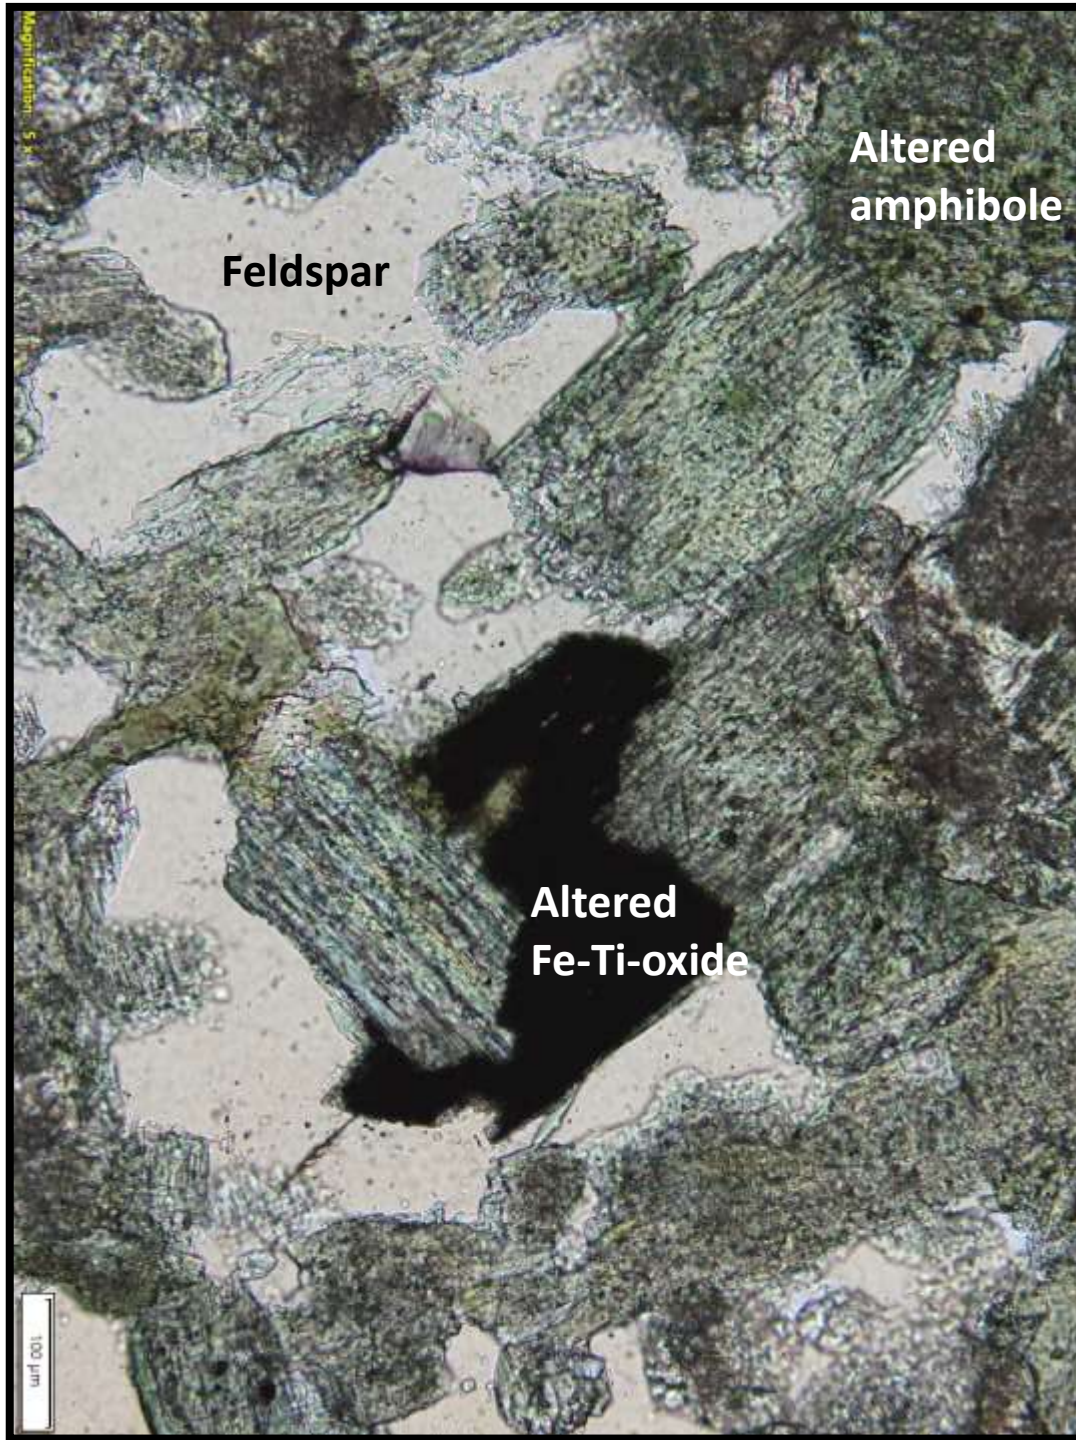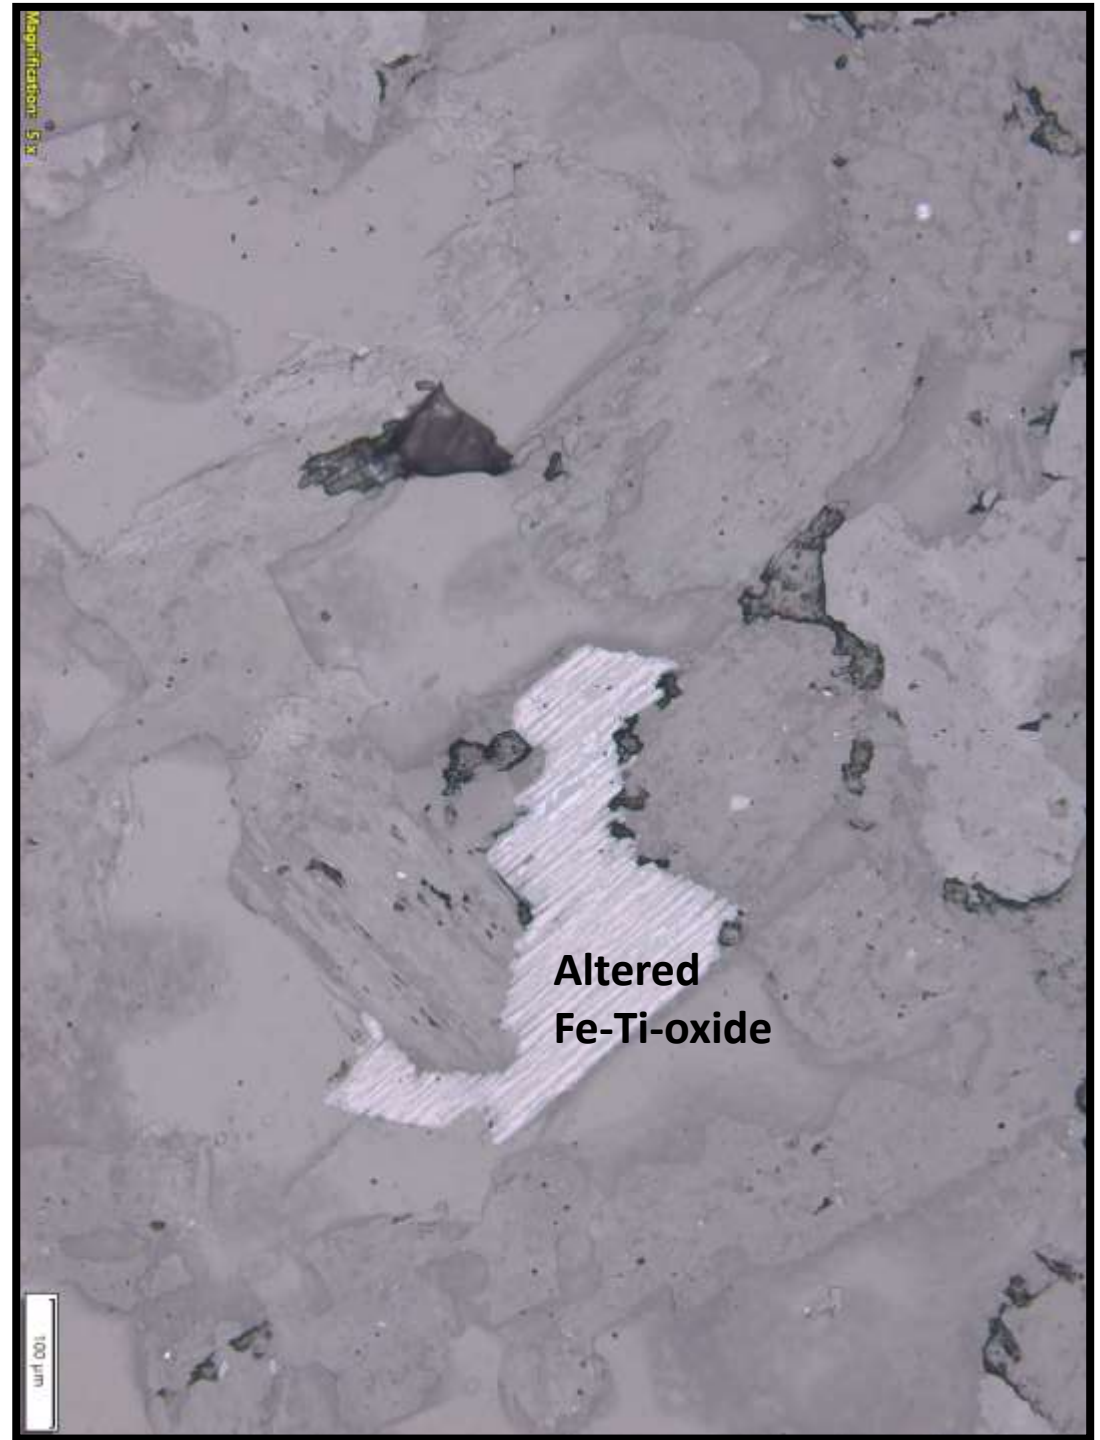



TR04

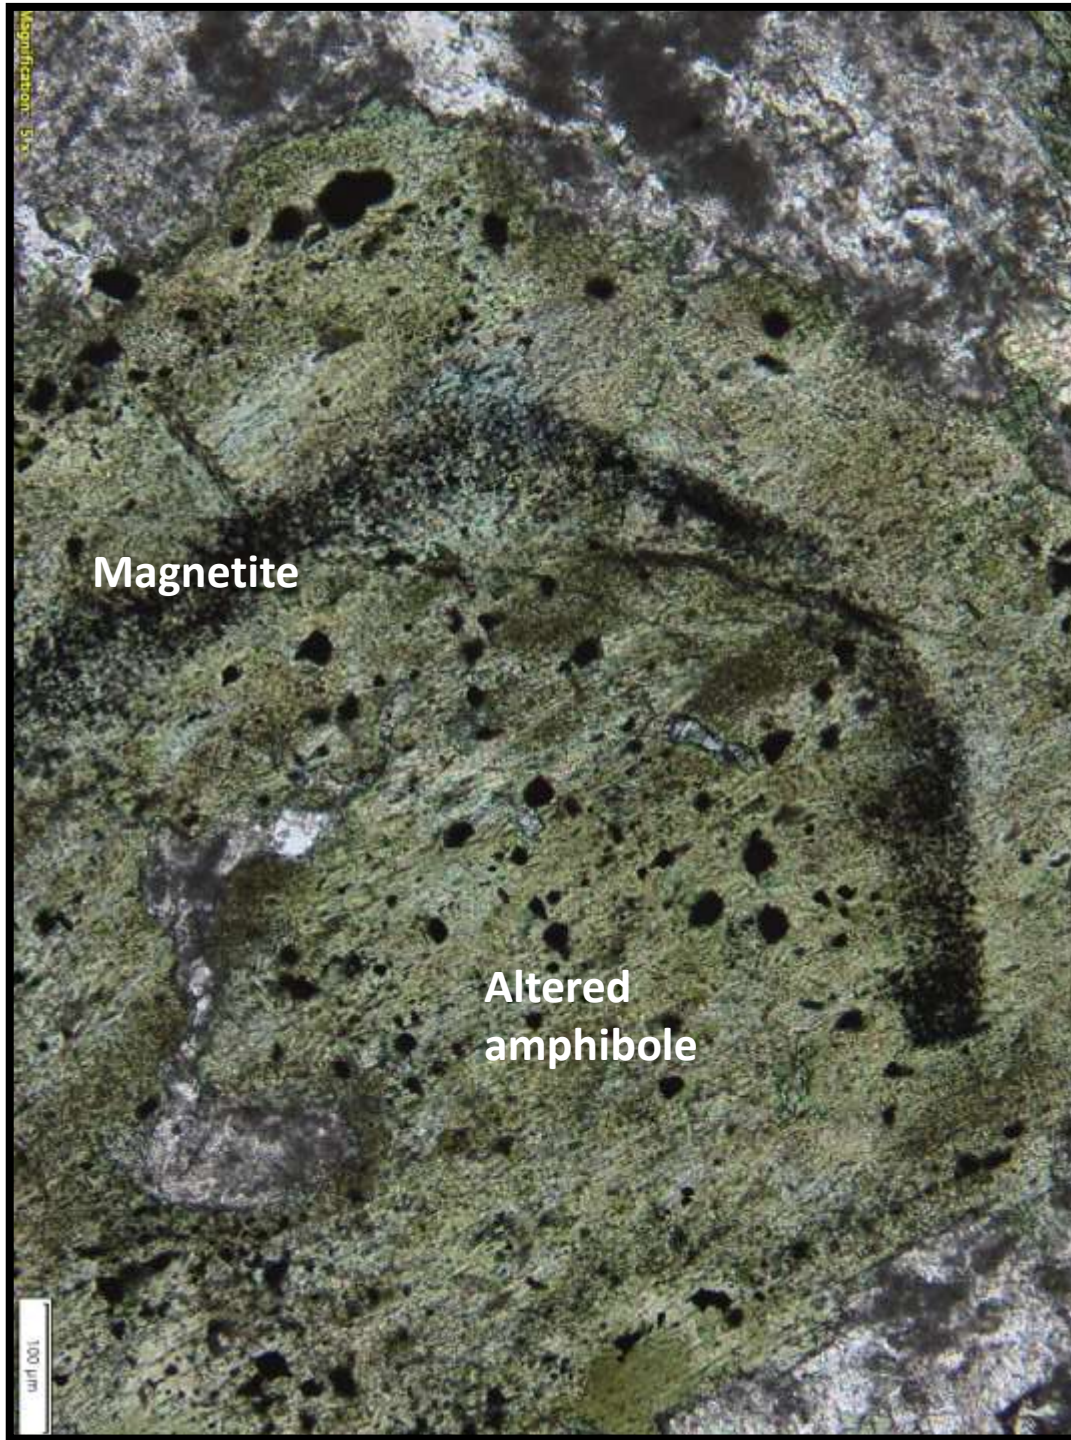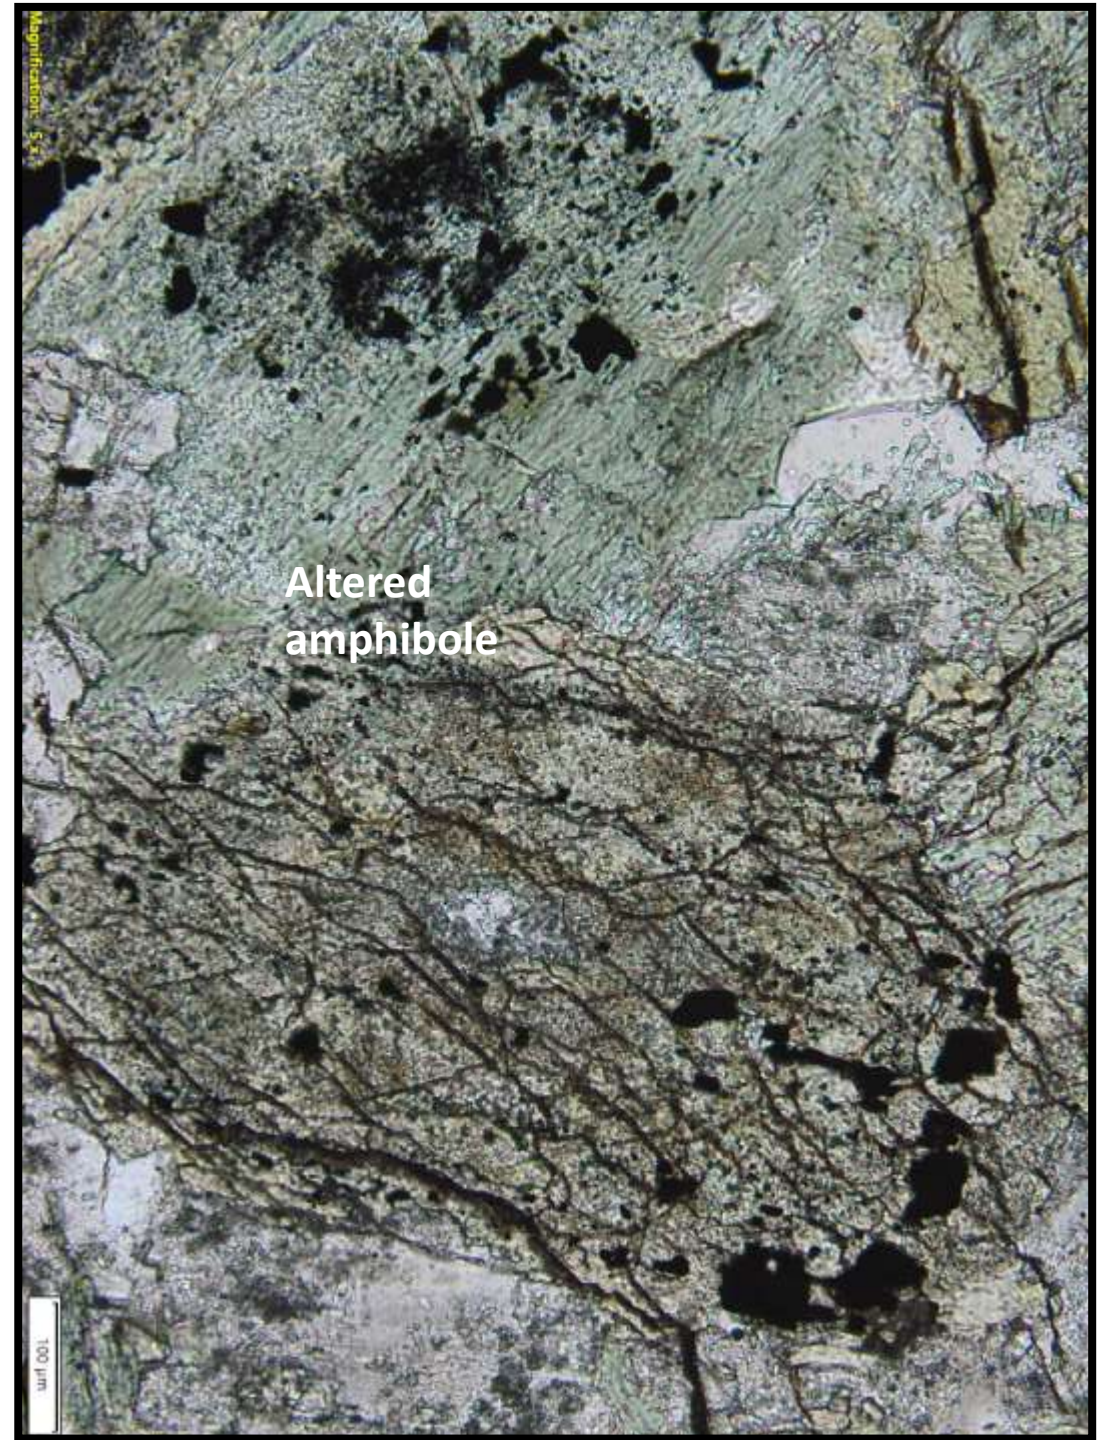



Phase 1a samples

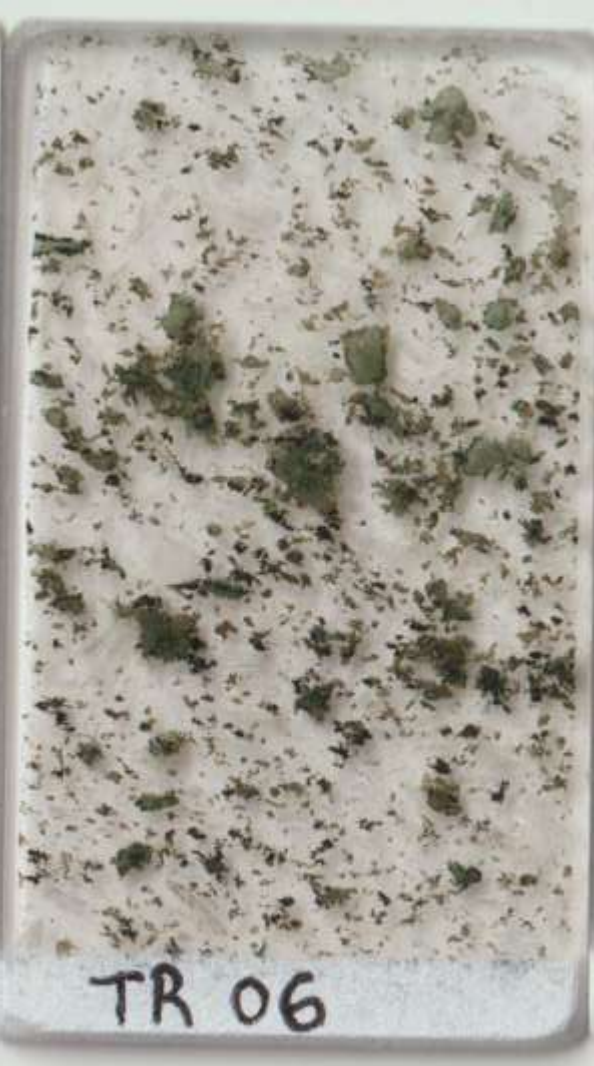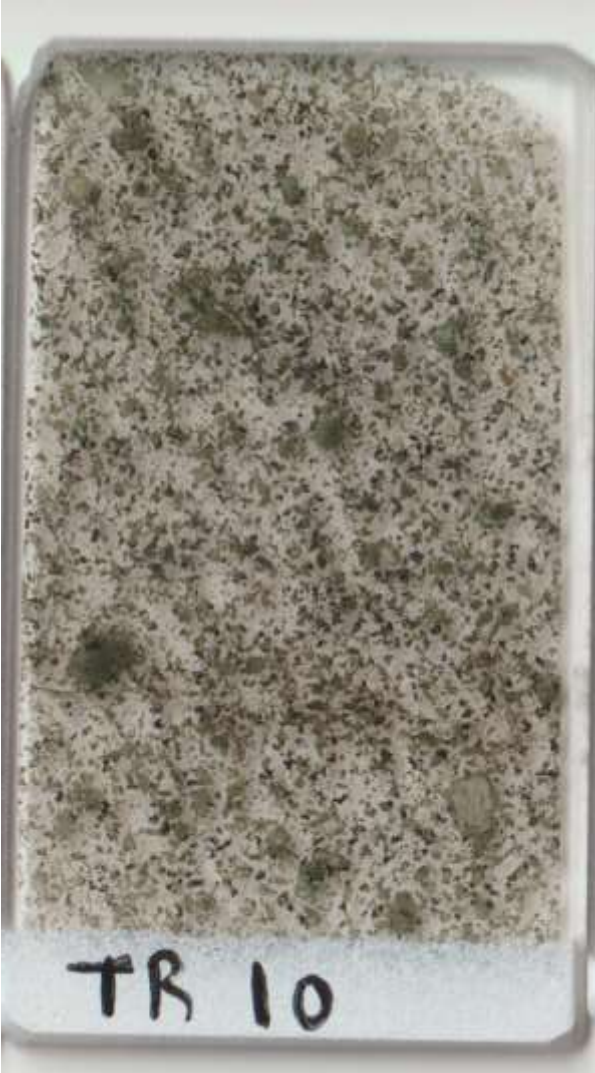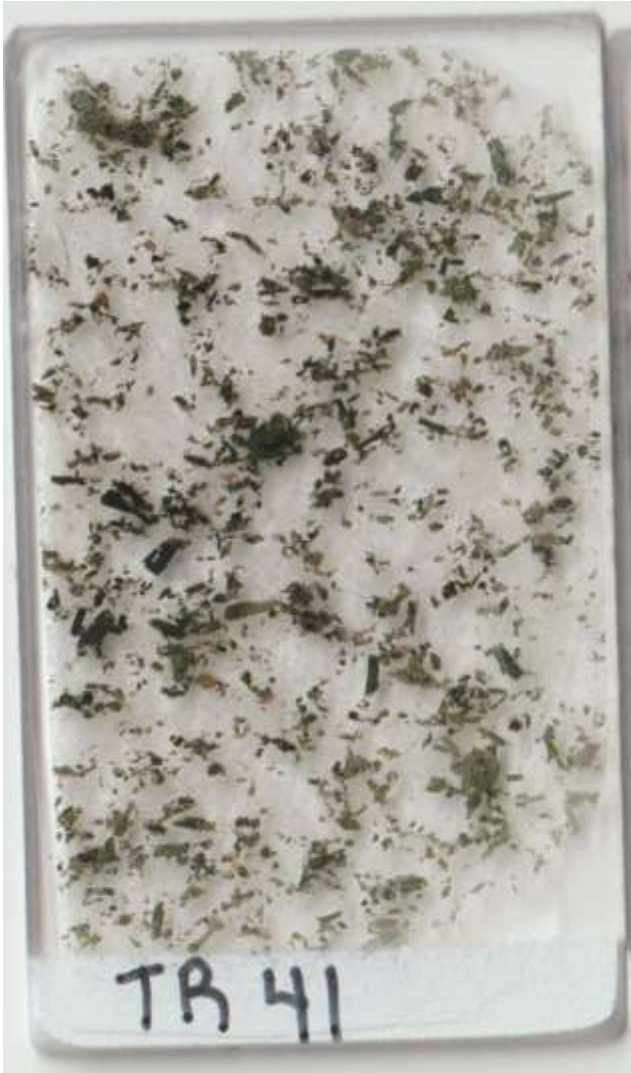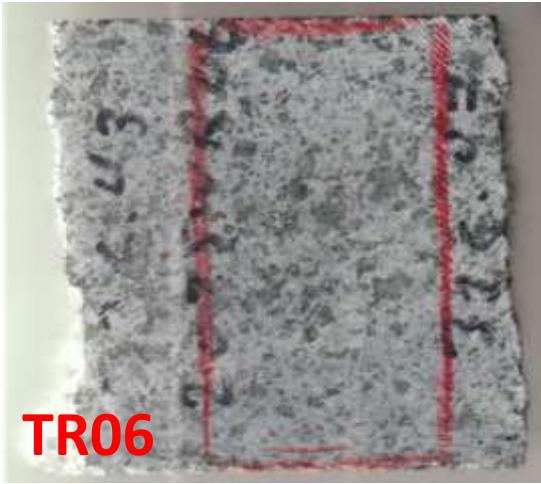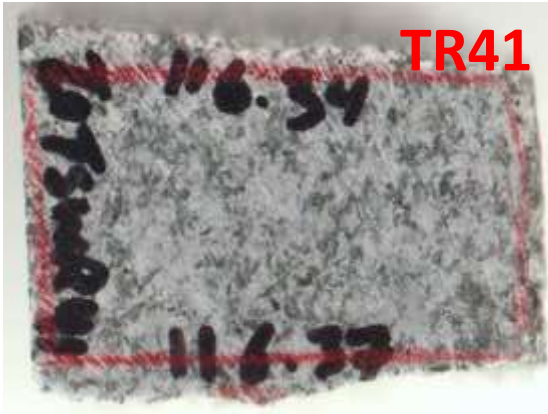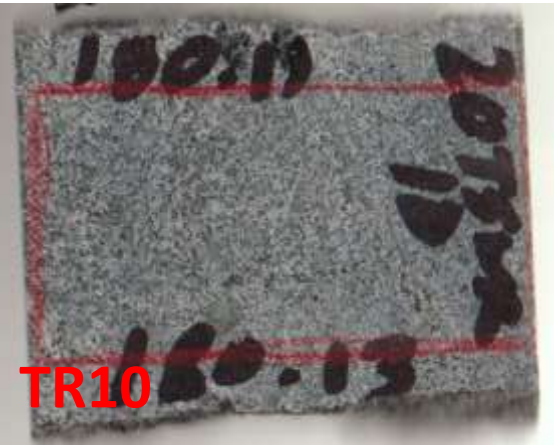



Phase 1a samples

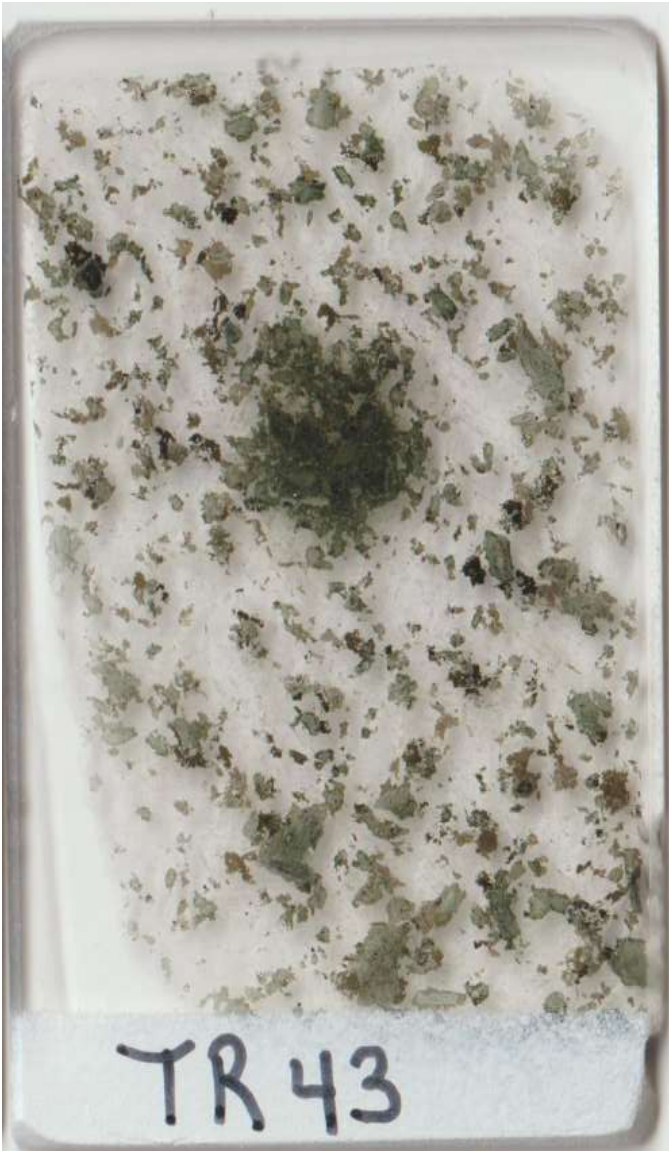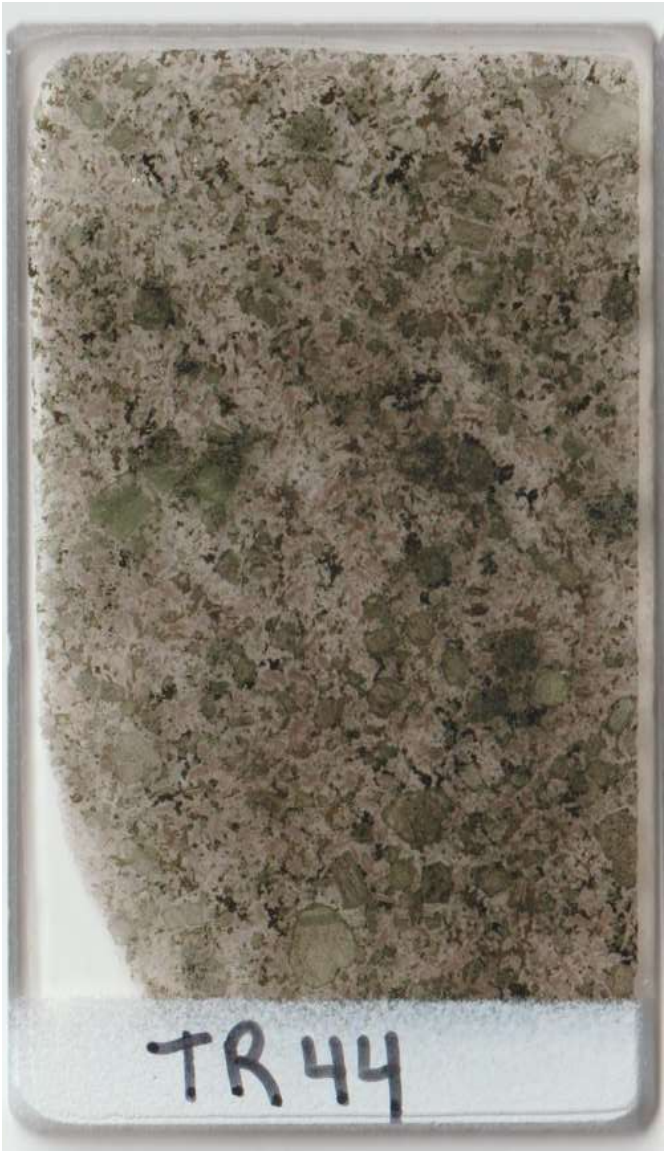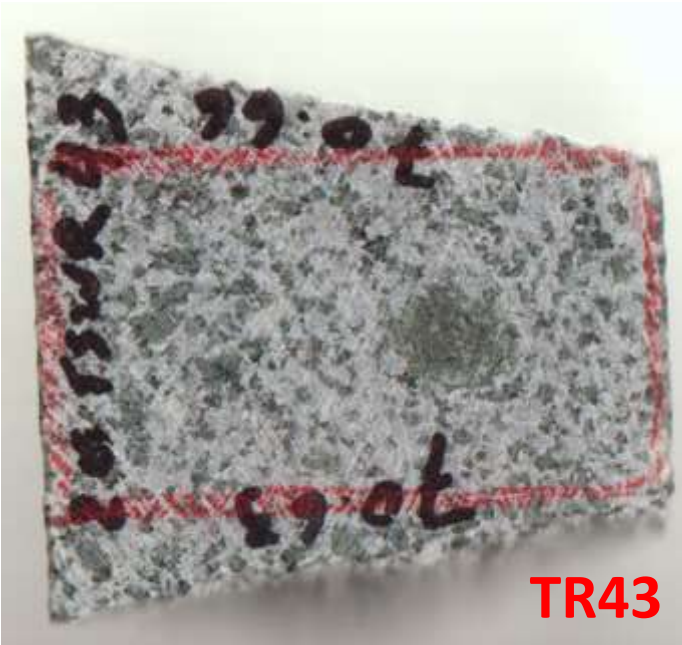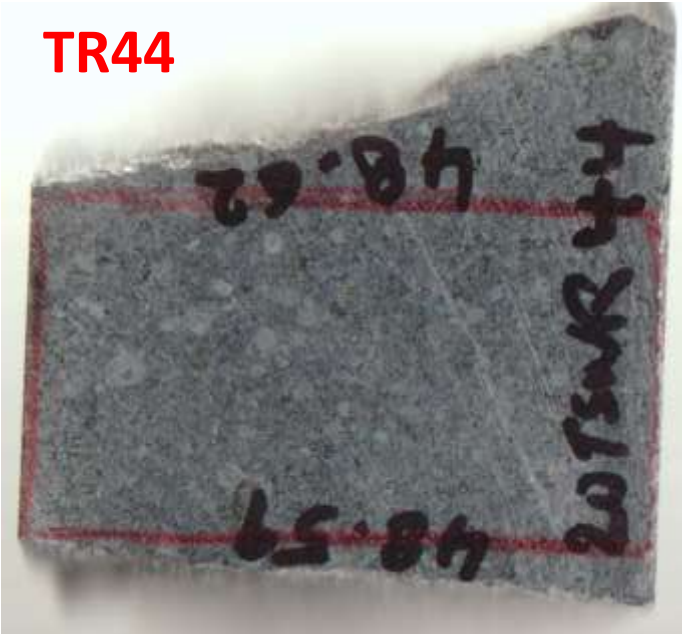



TR06

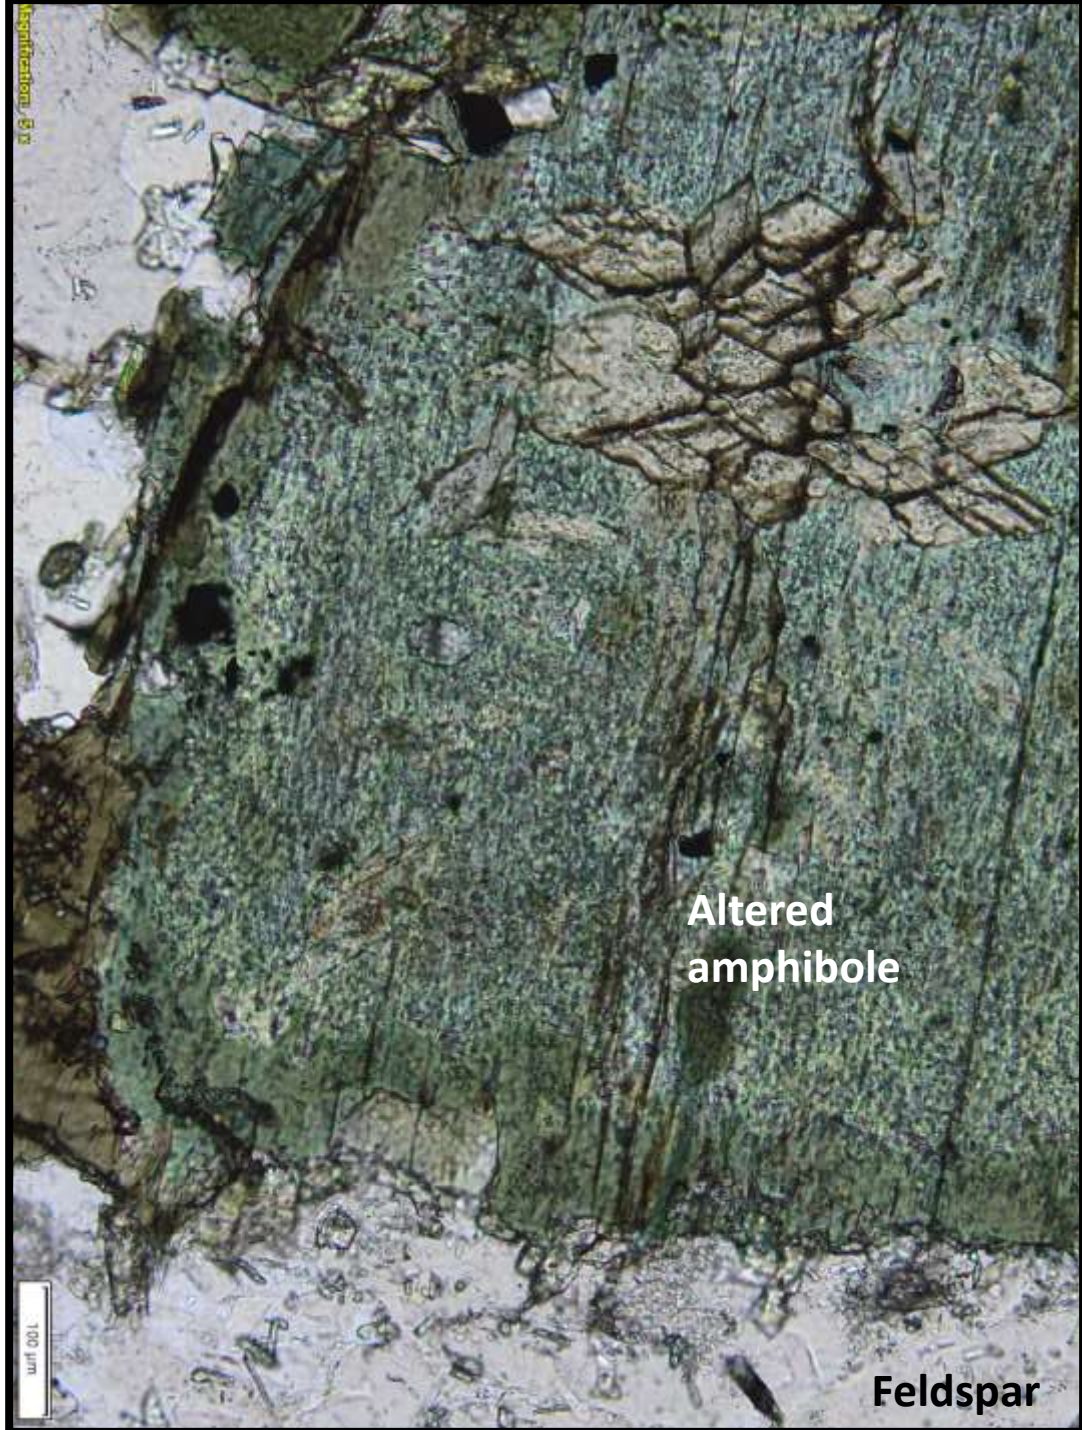

TR10

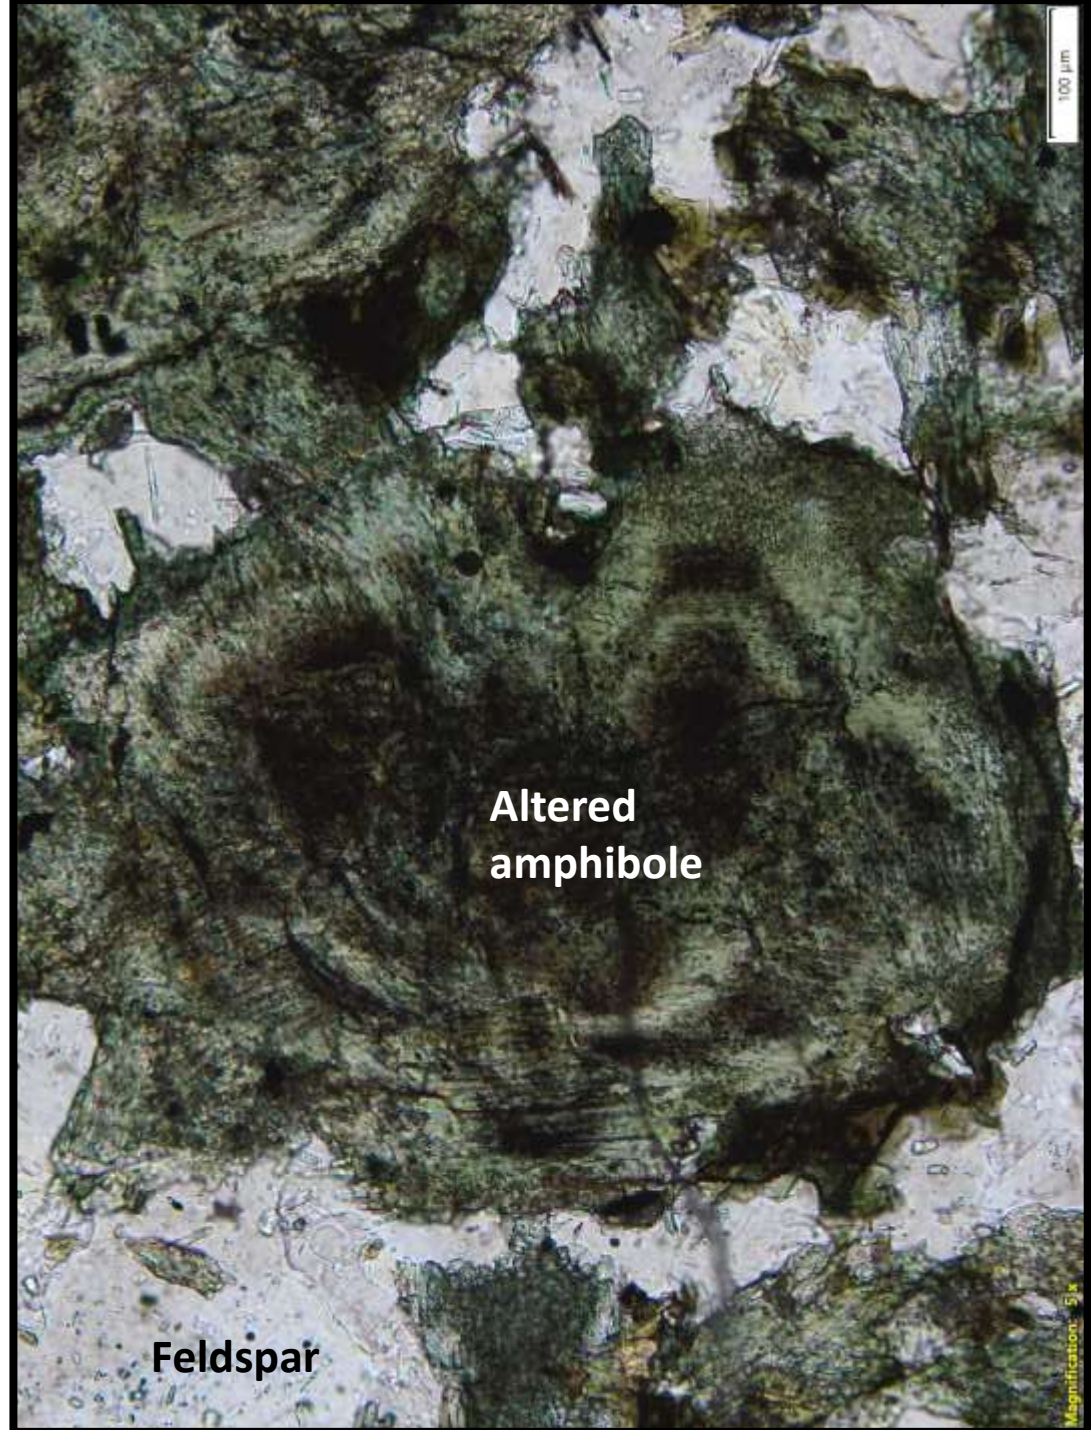



TR41

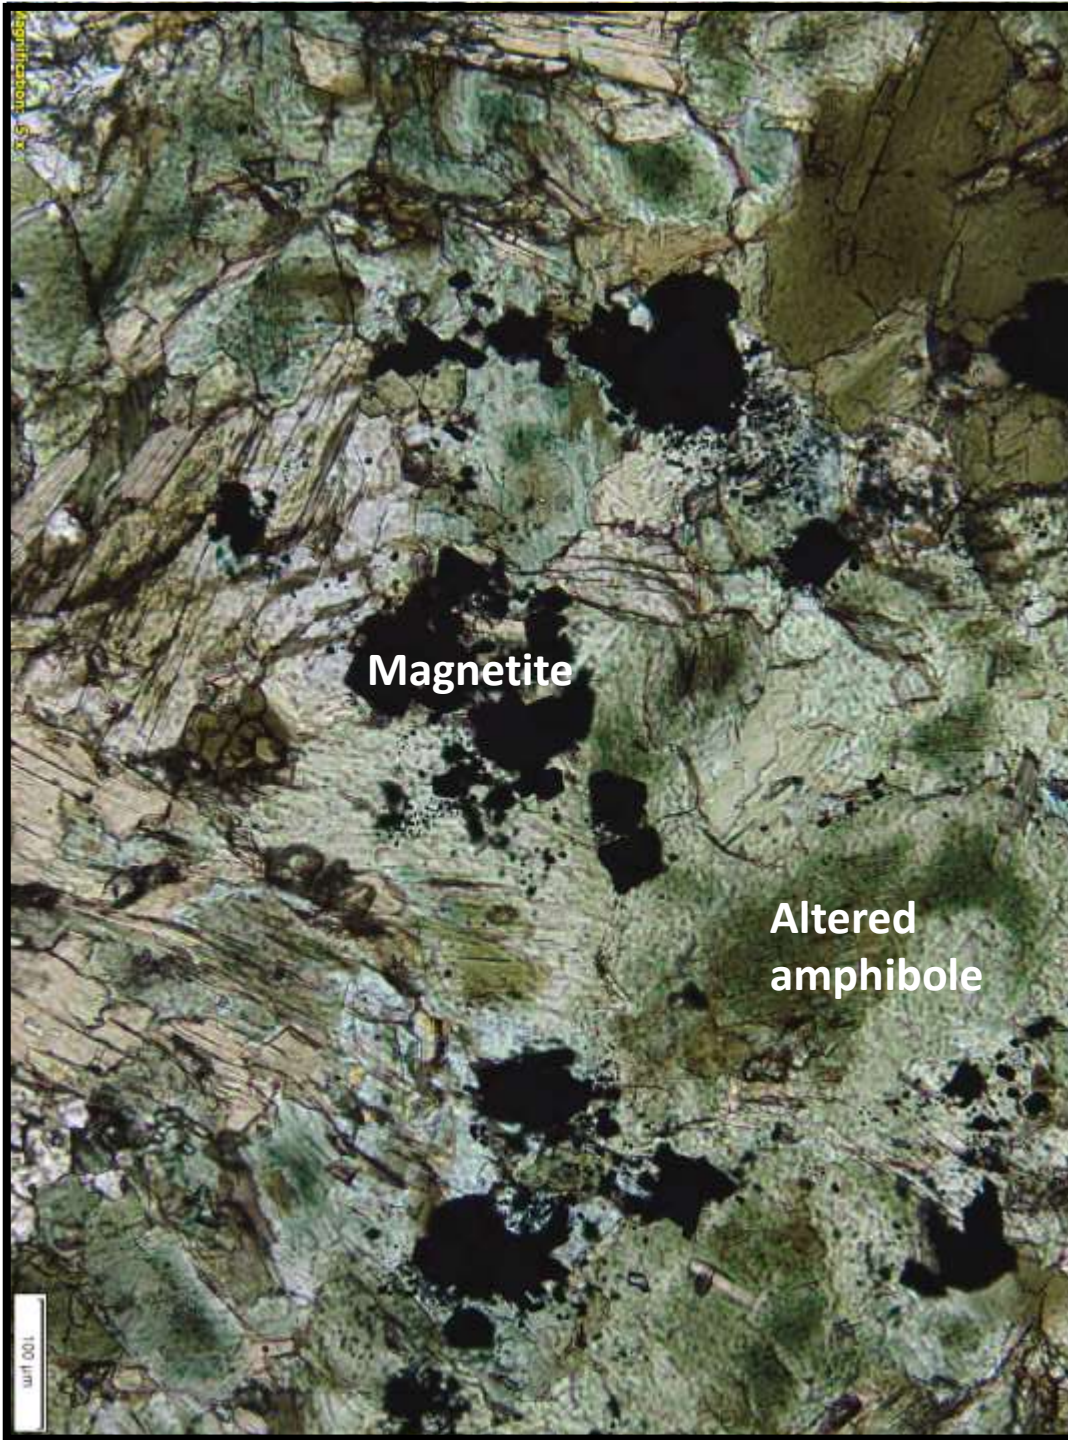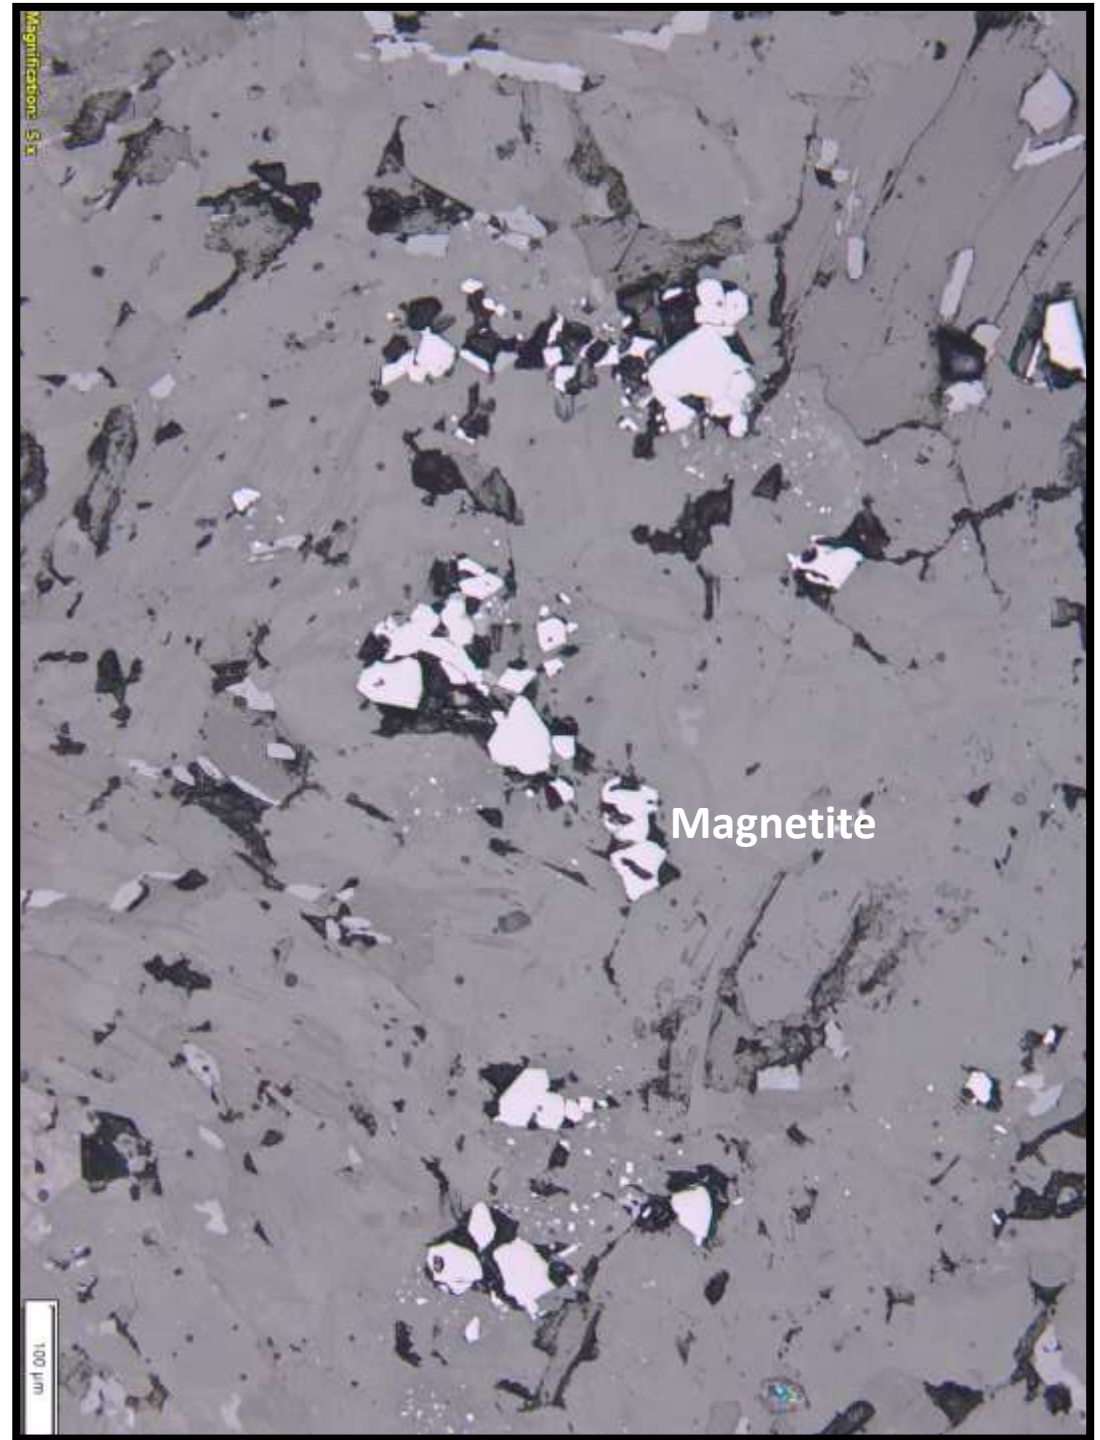



TR43

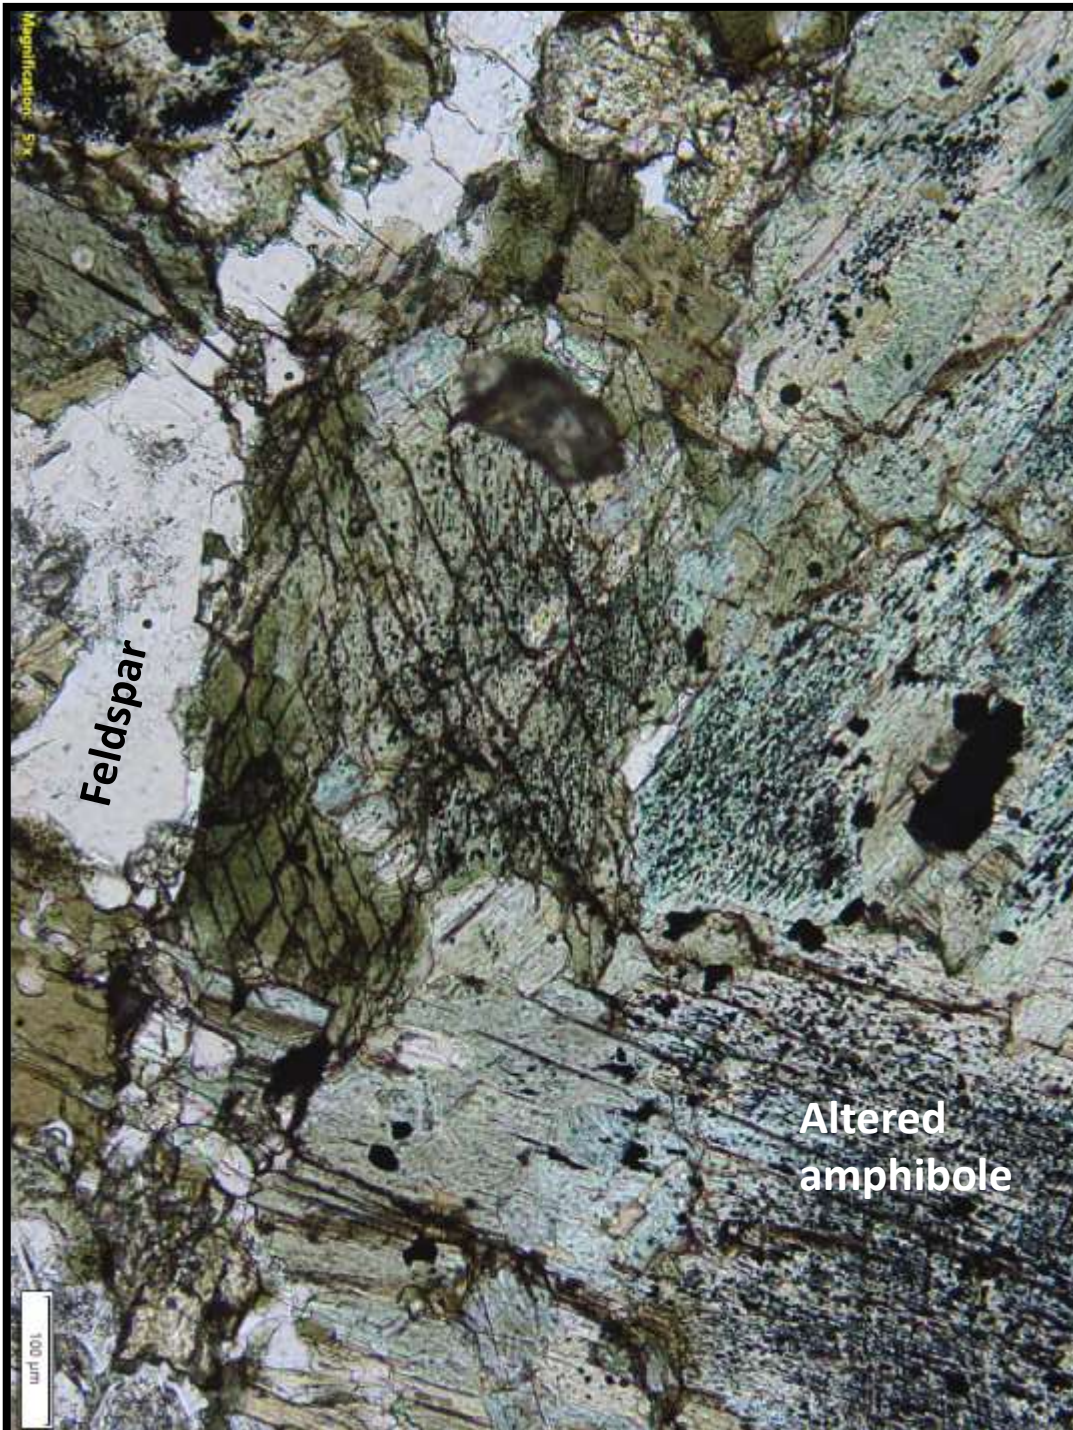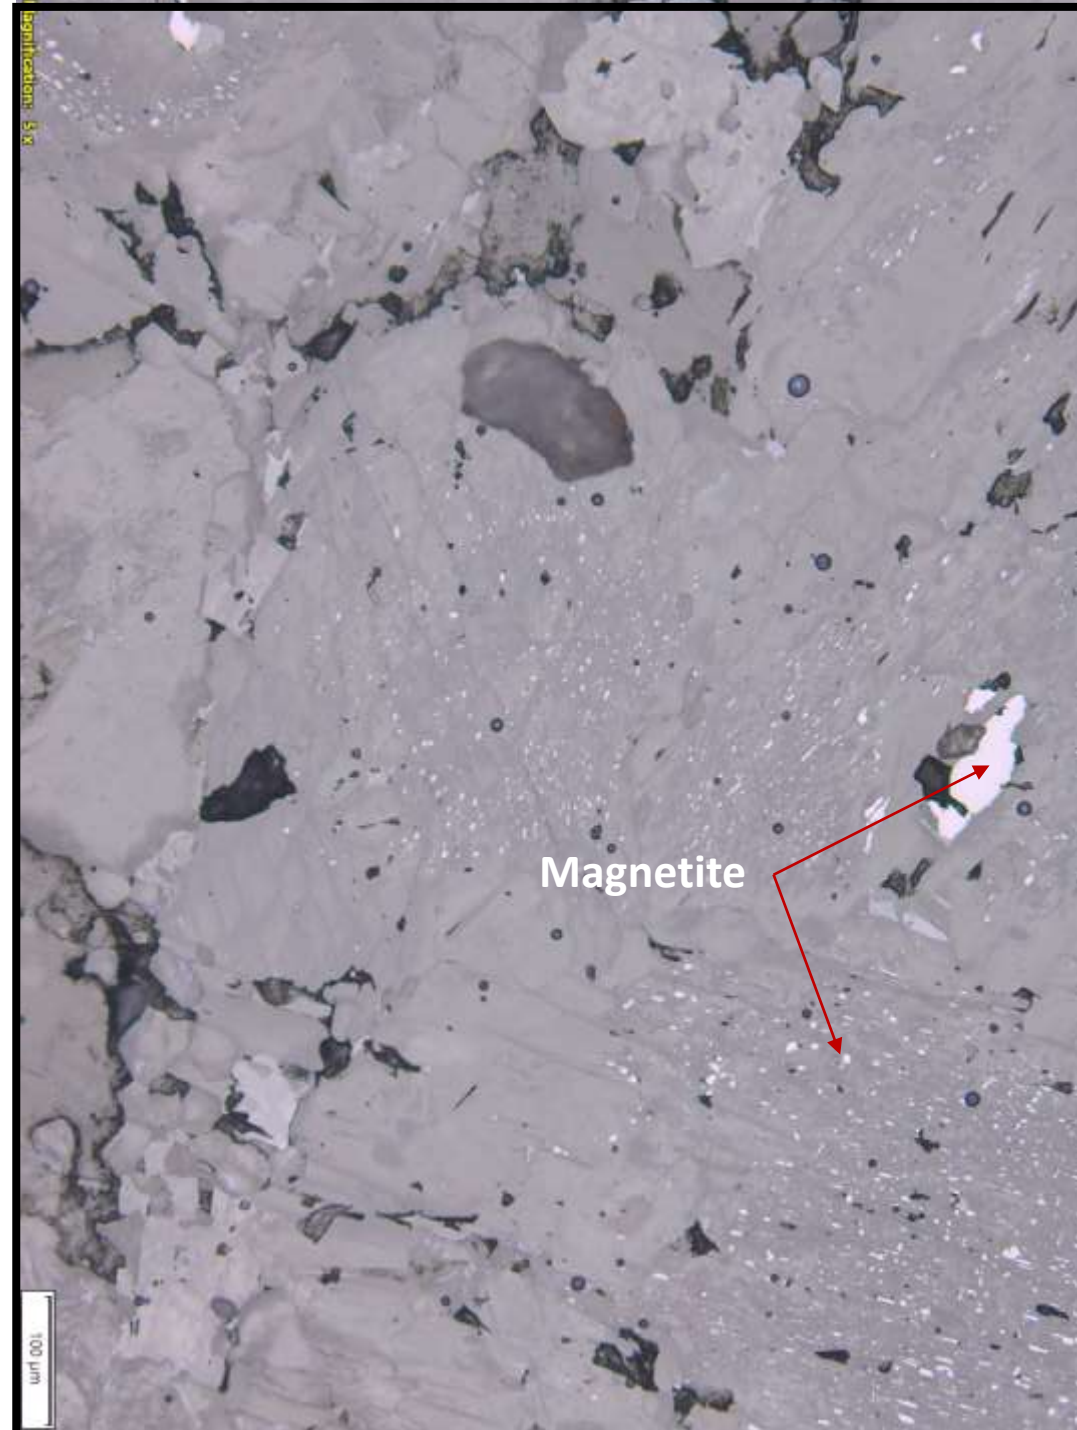



TR44

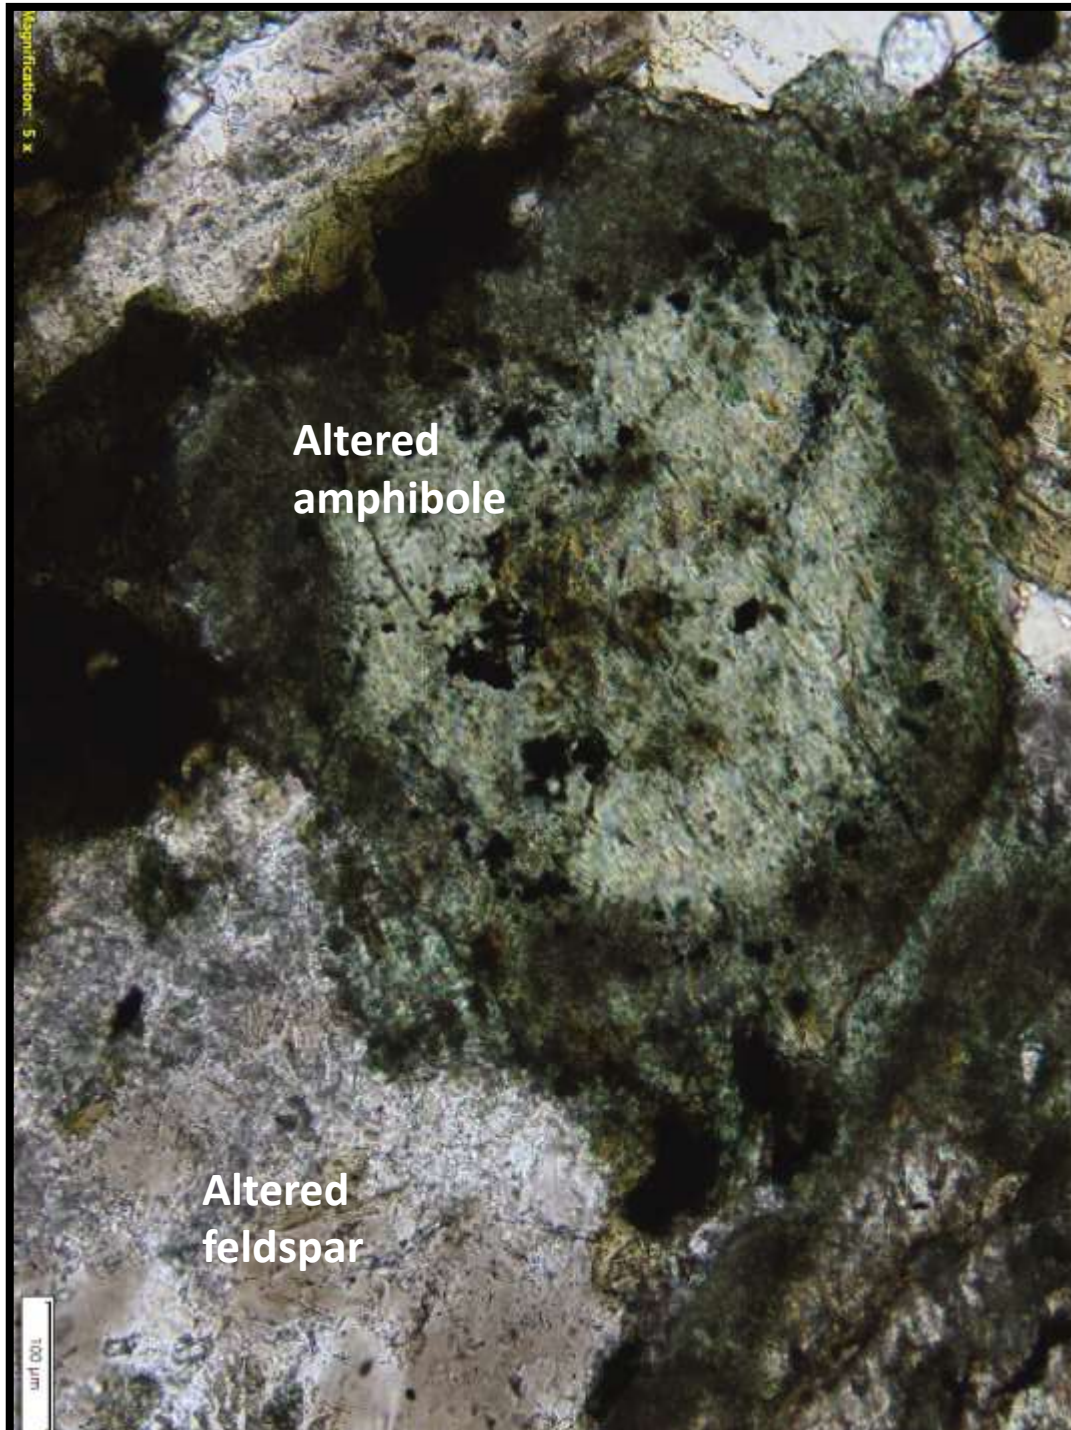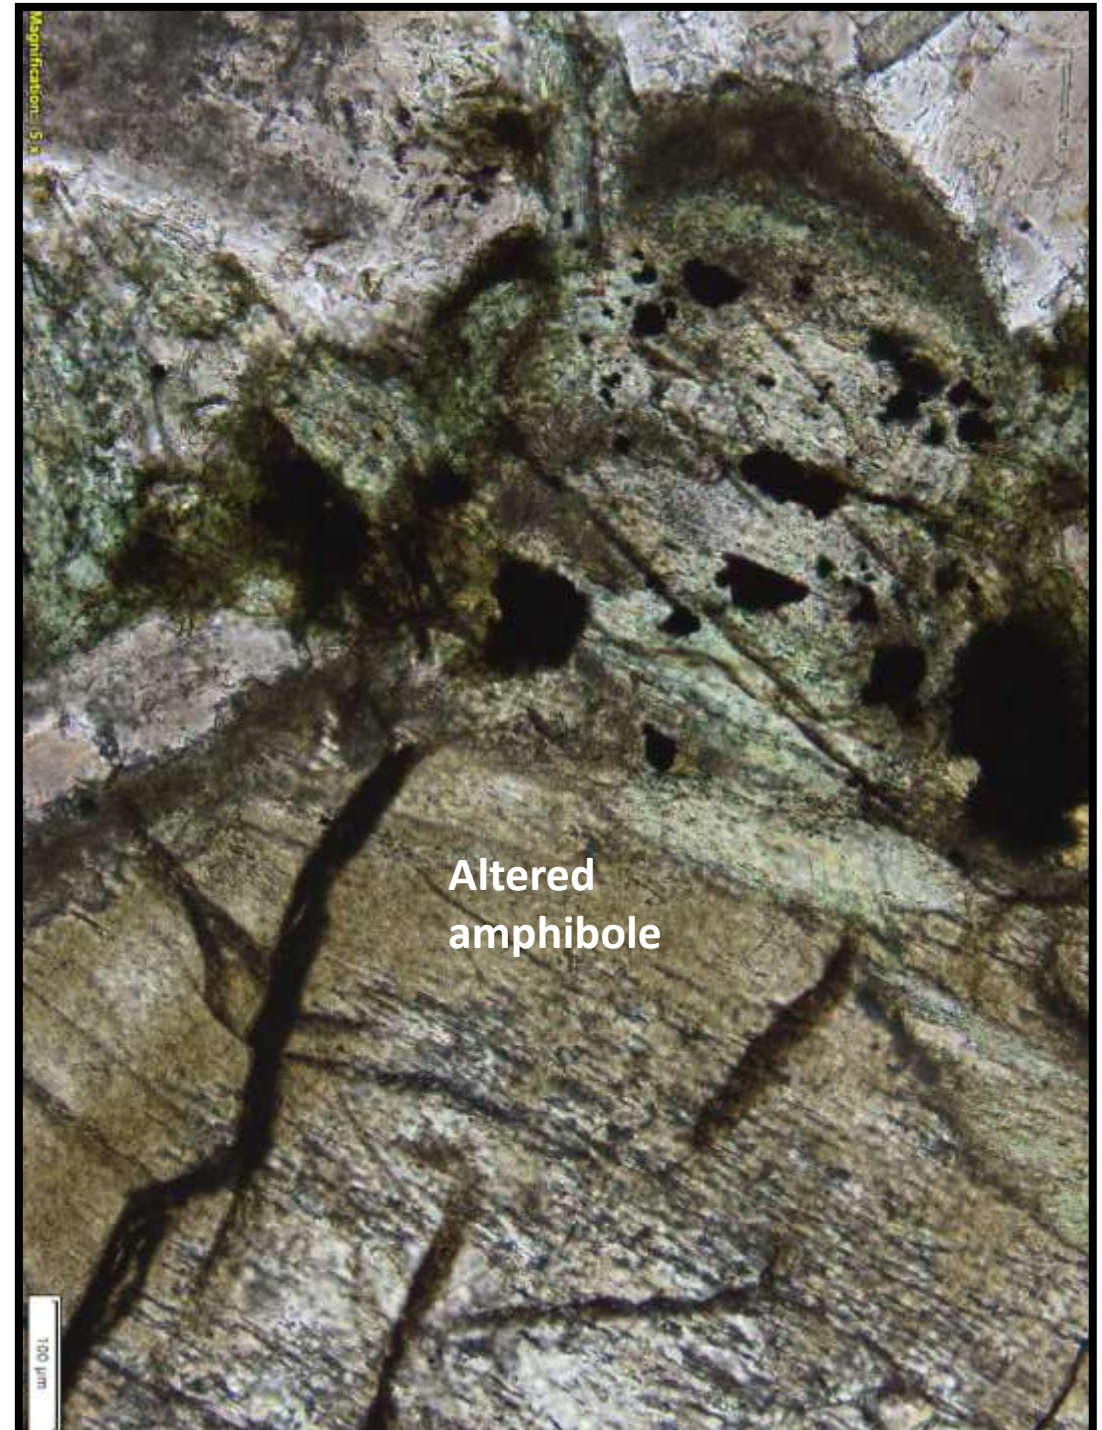



Phase 1b samples

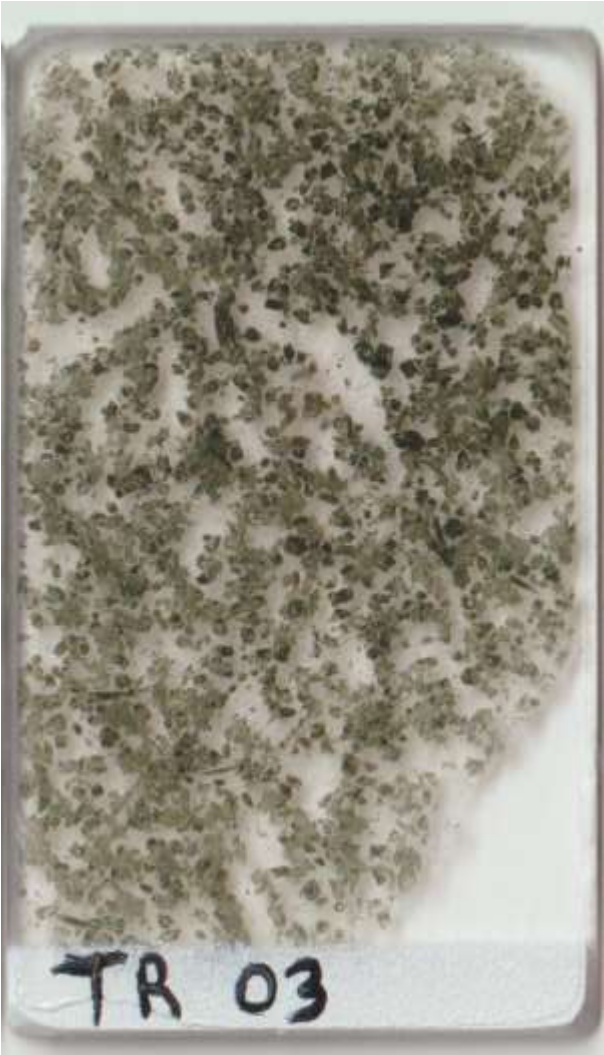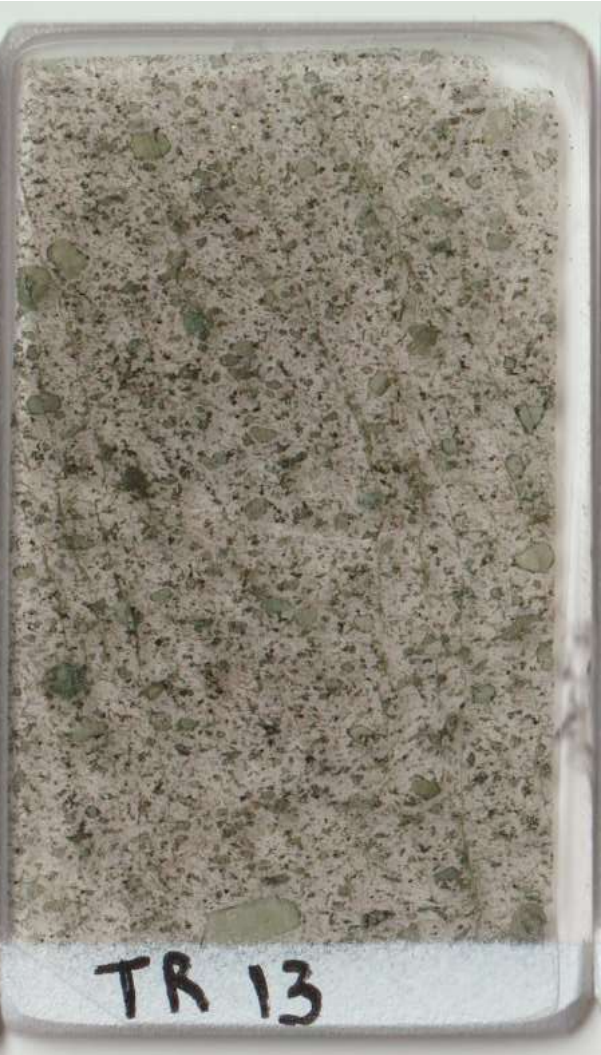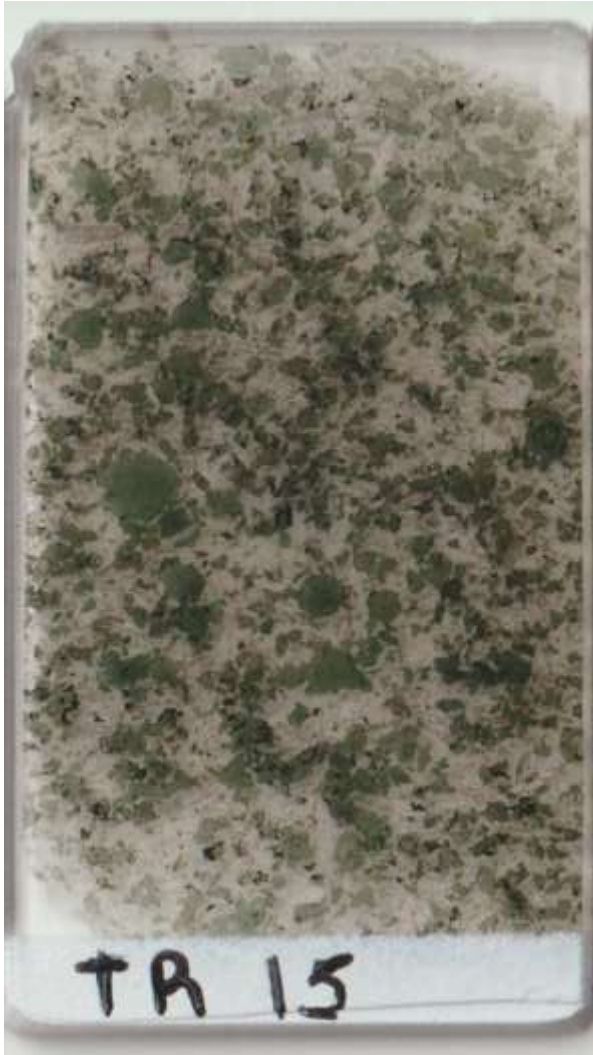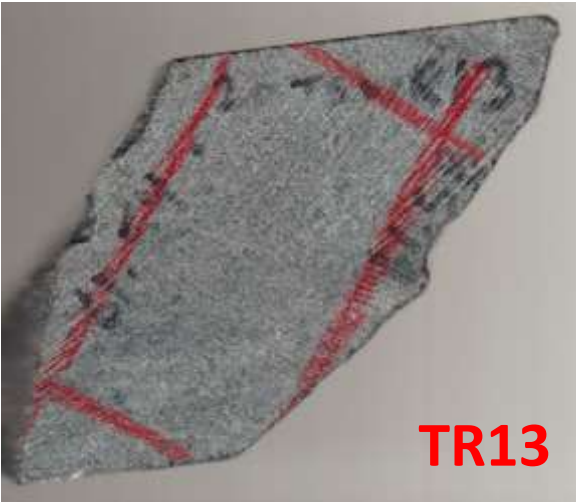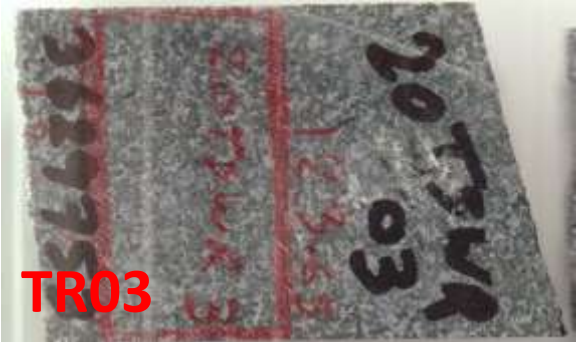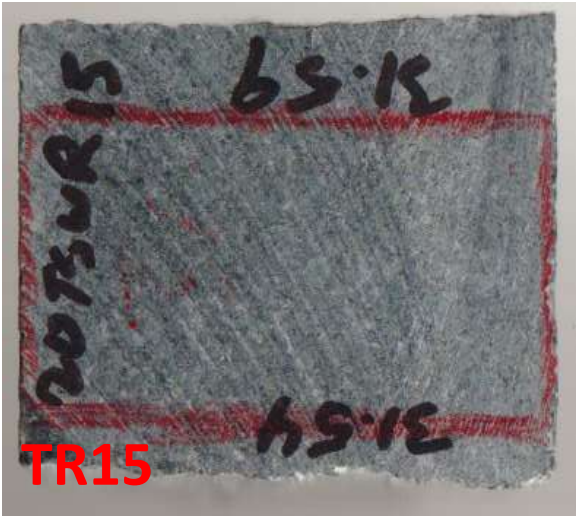



Phase 1b samples

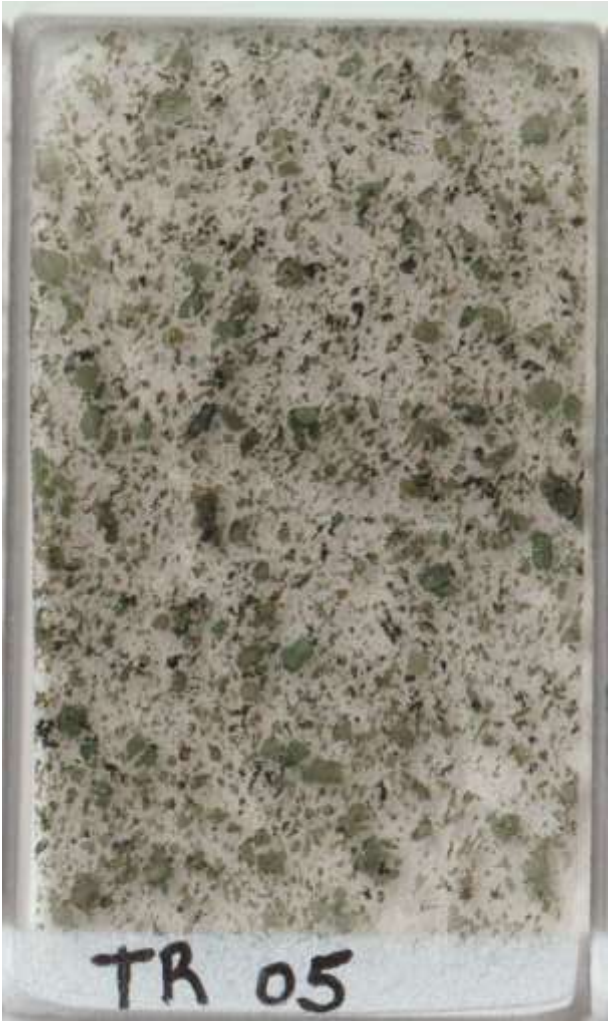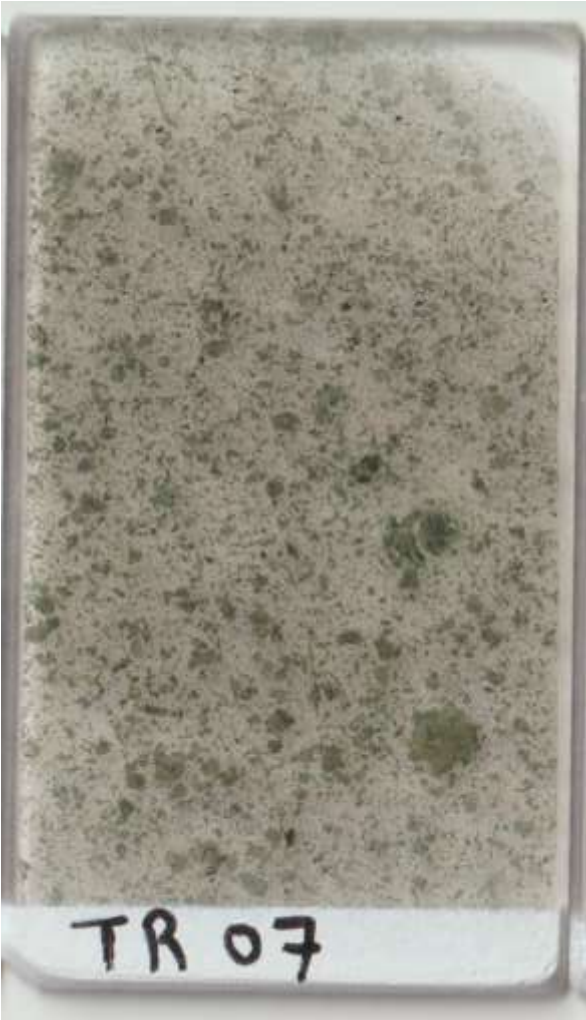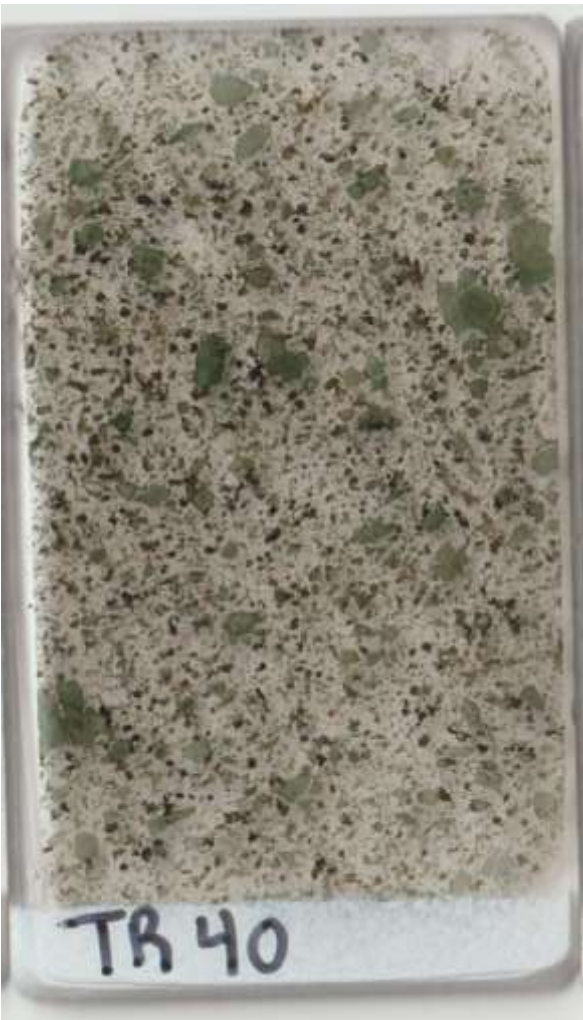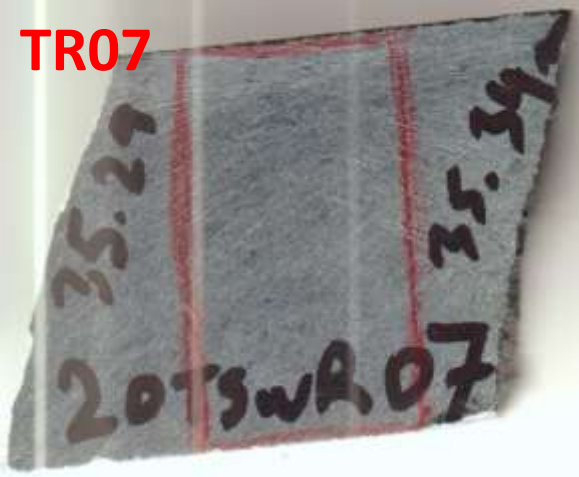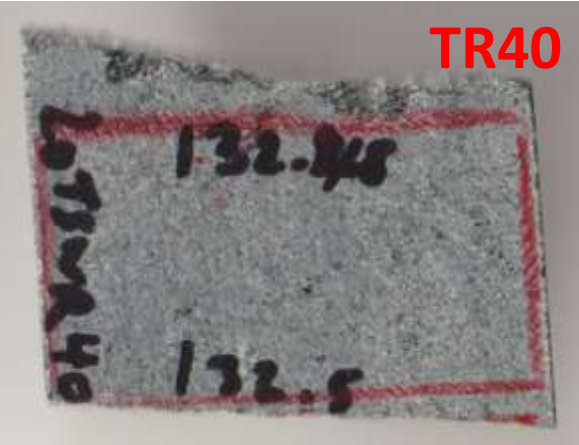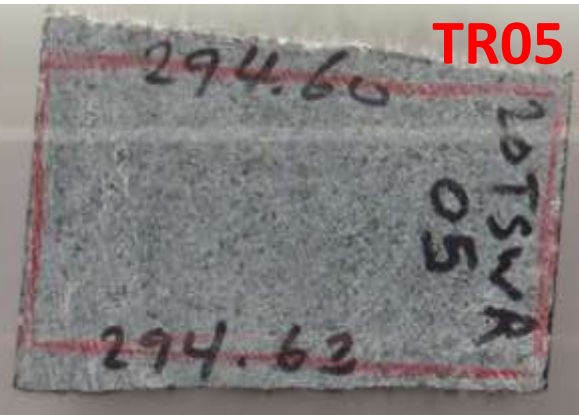



TR05

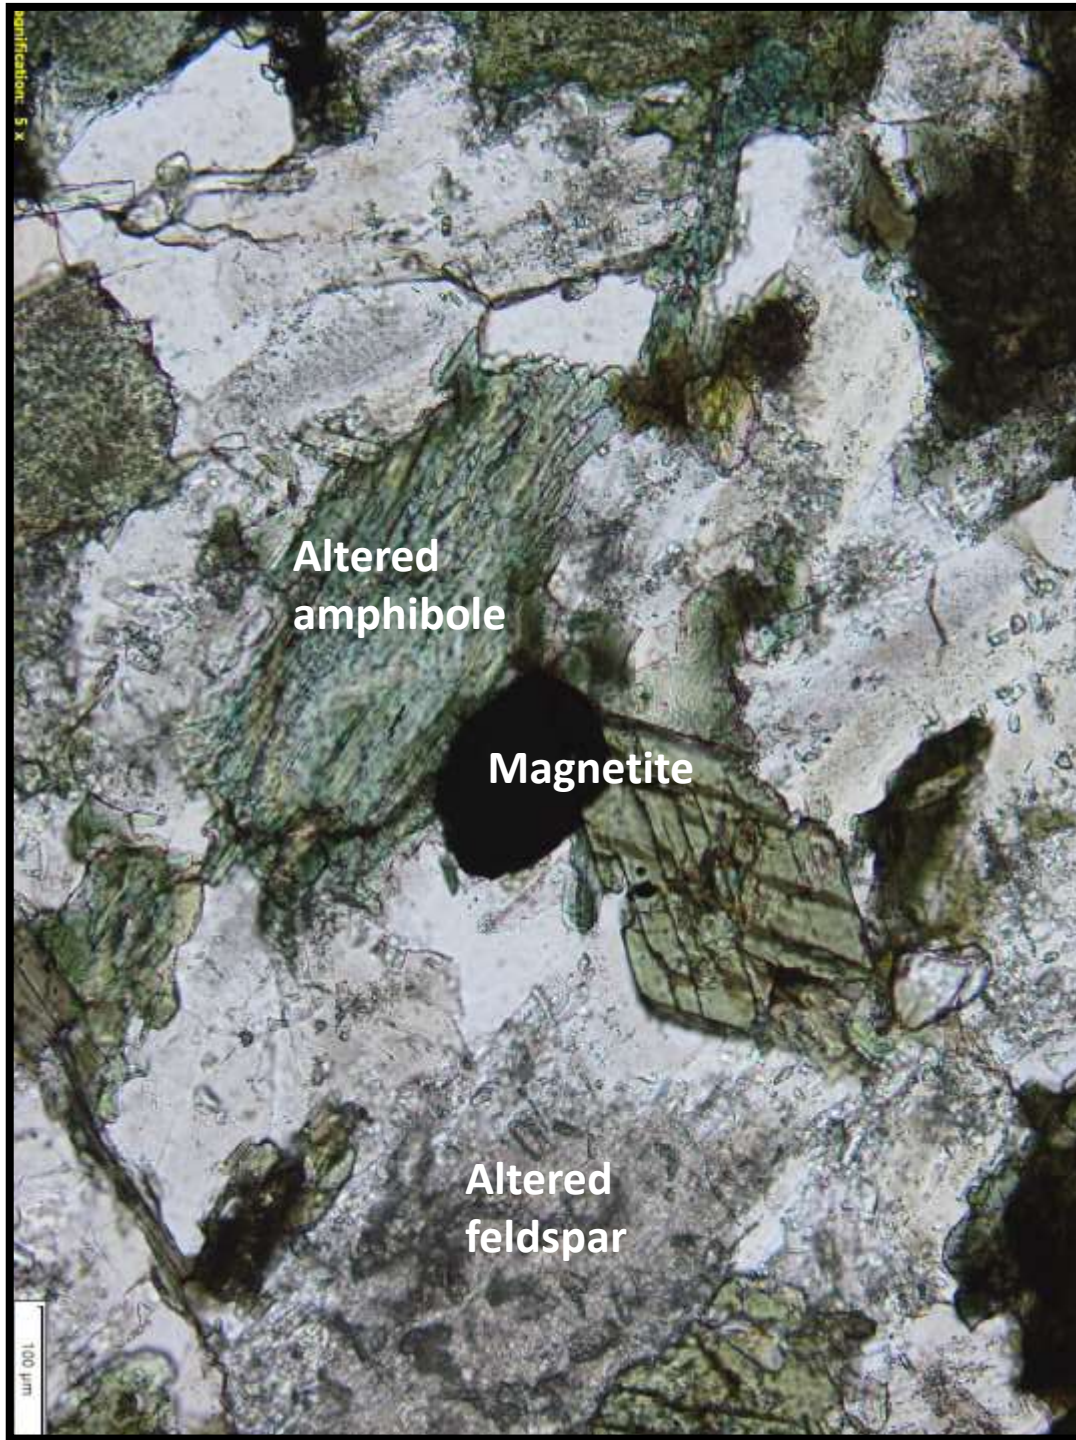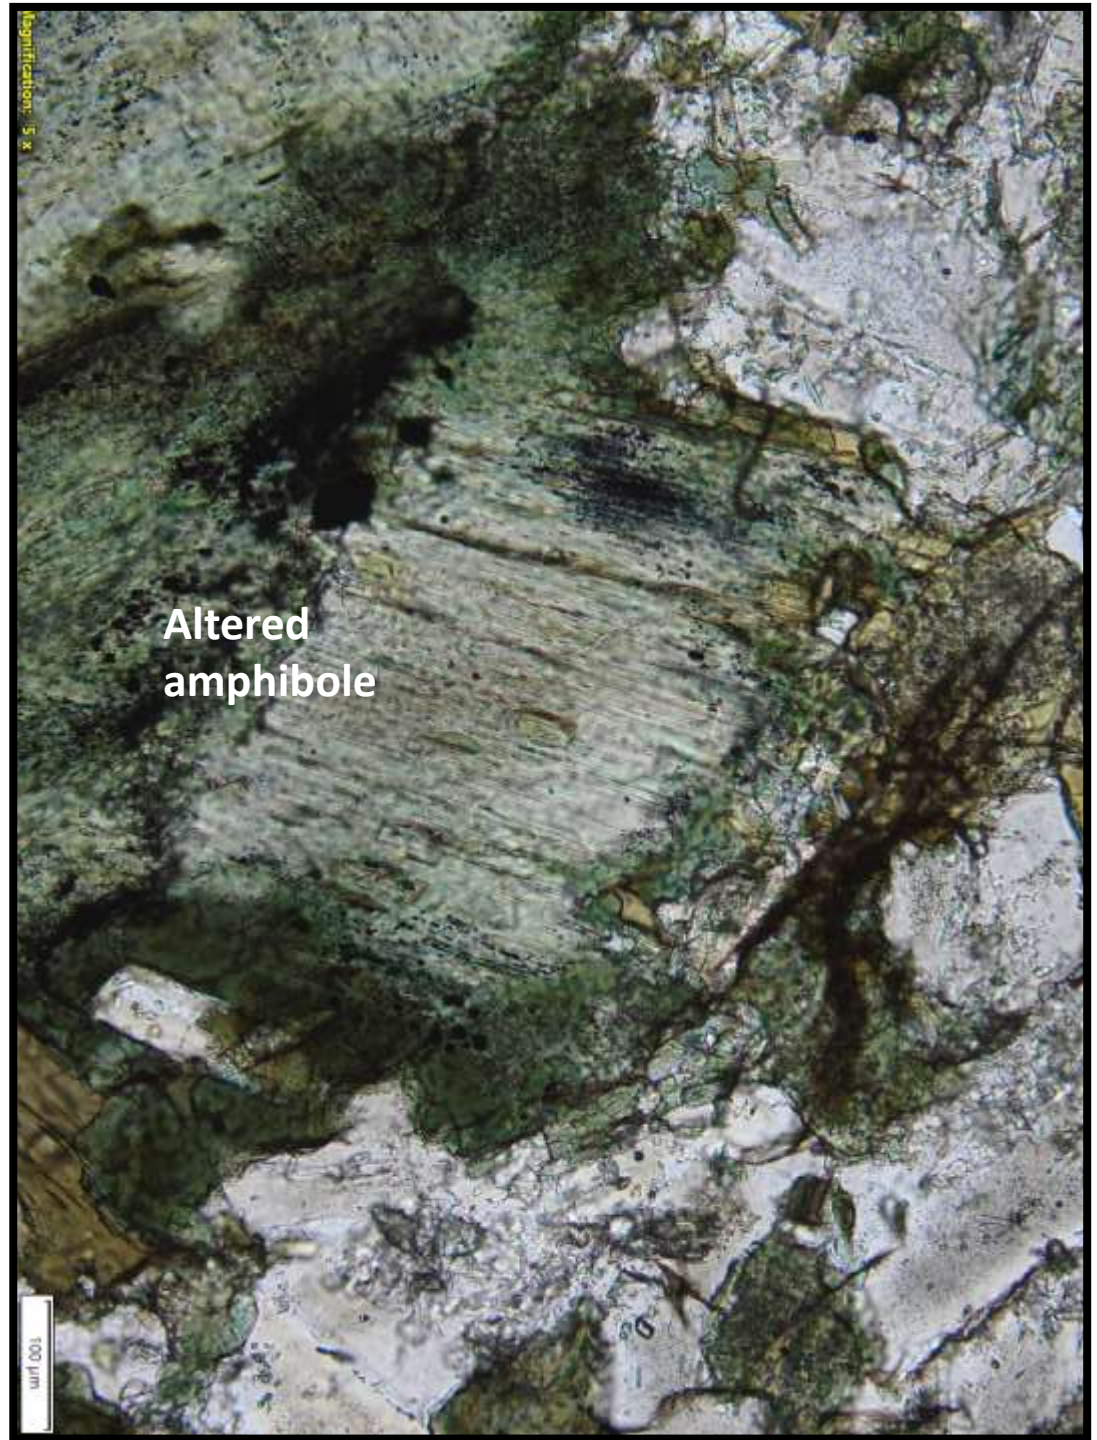



TR40

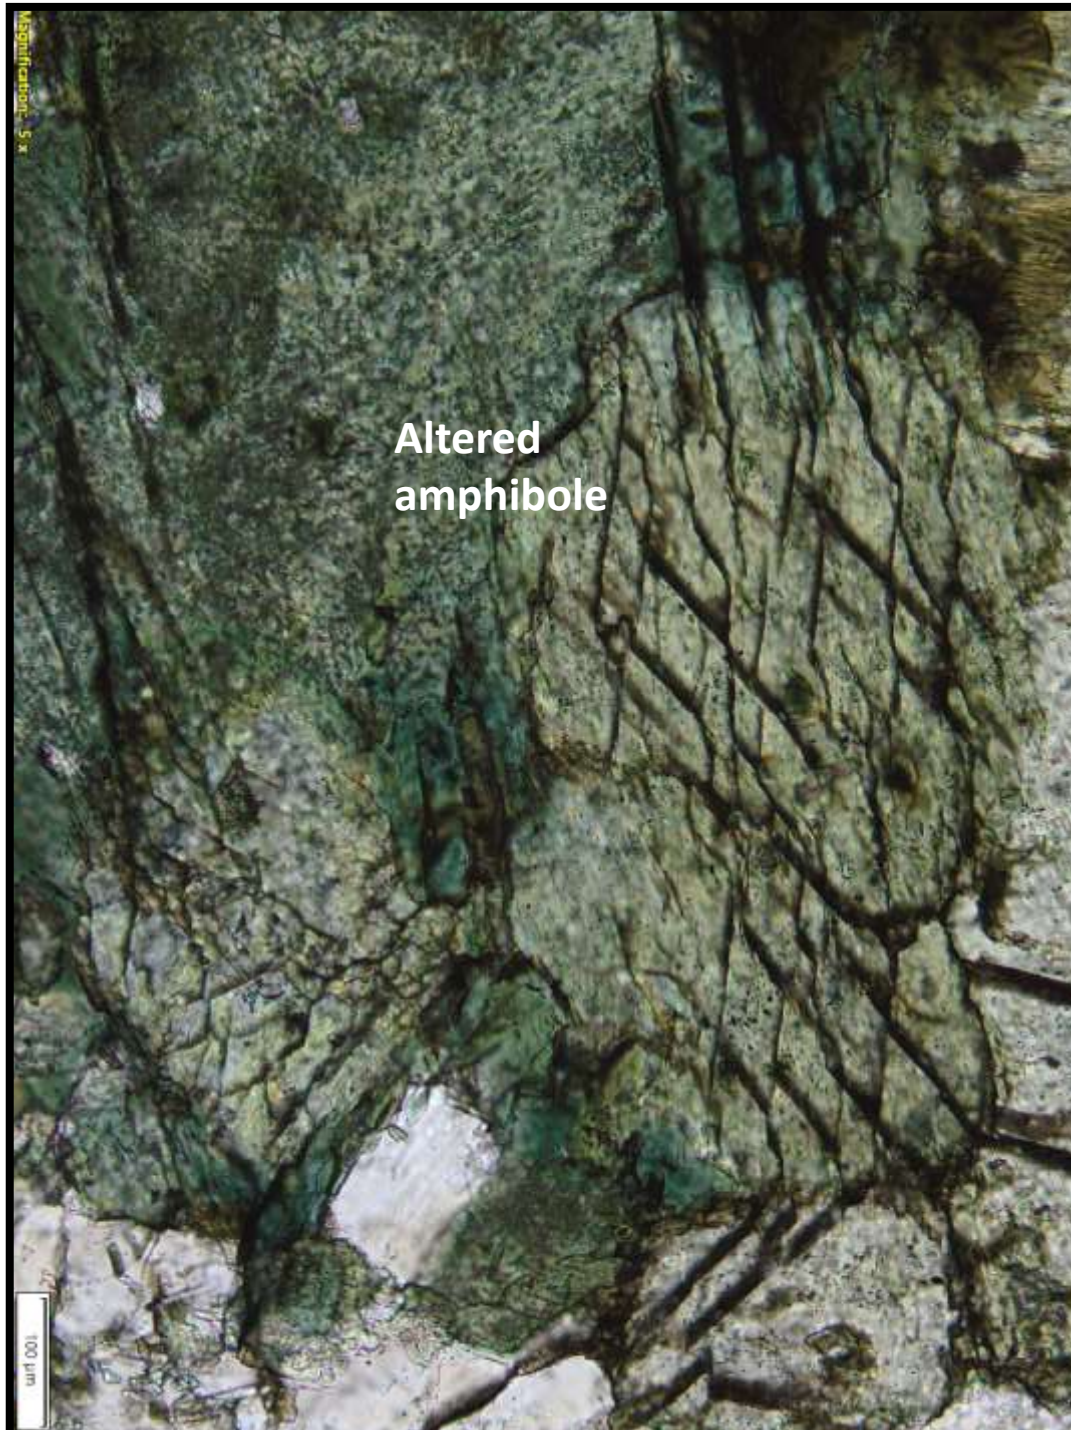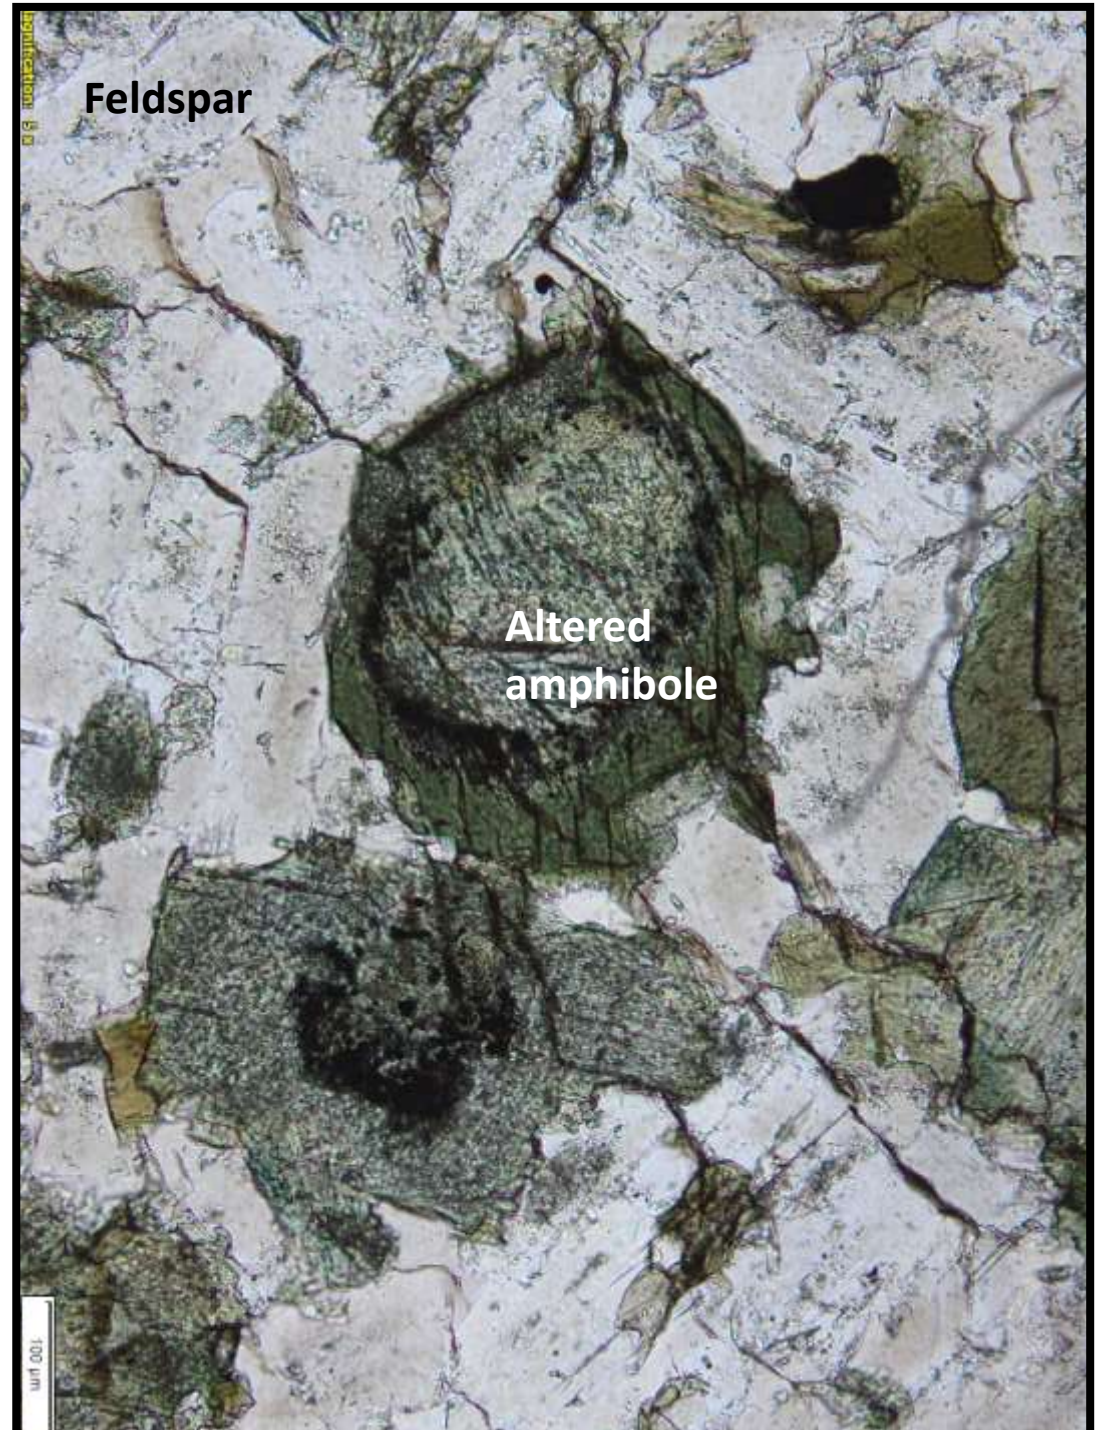



TR07

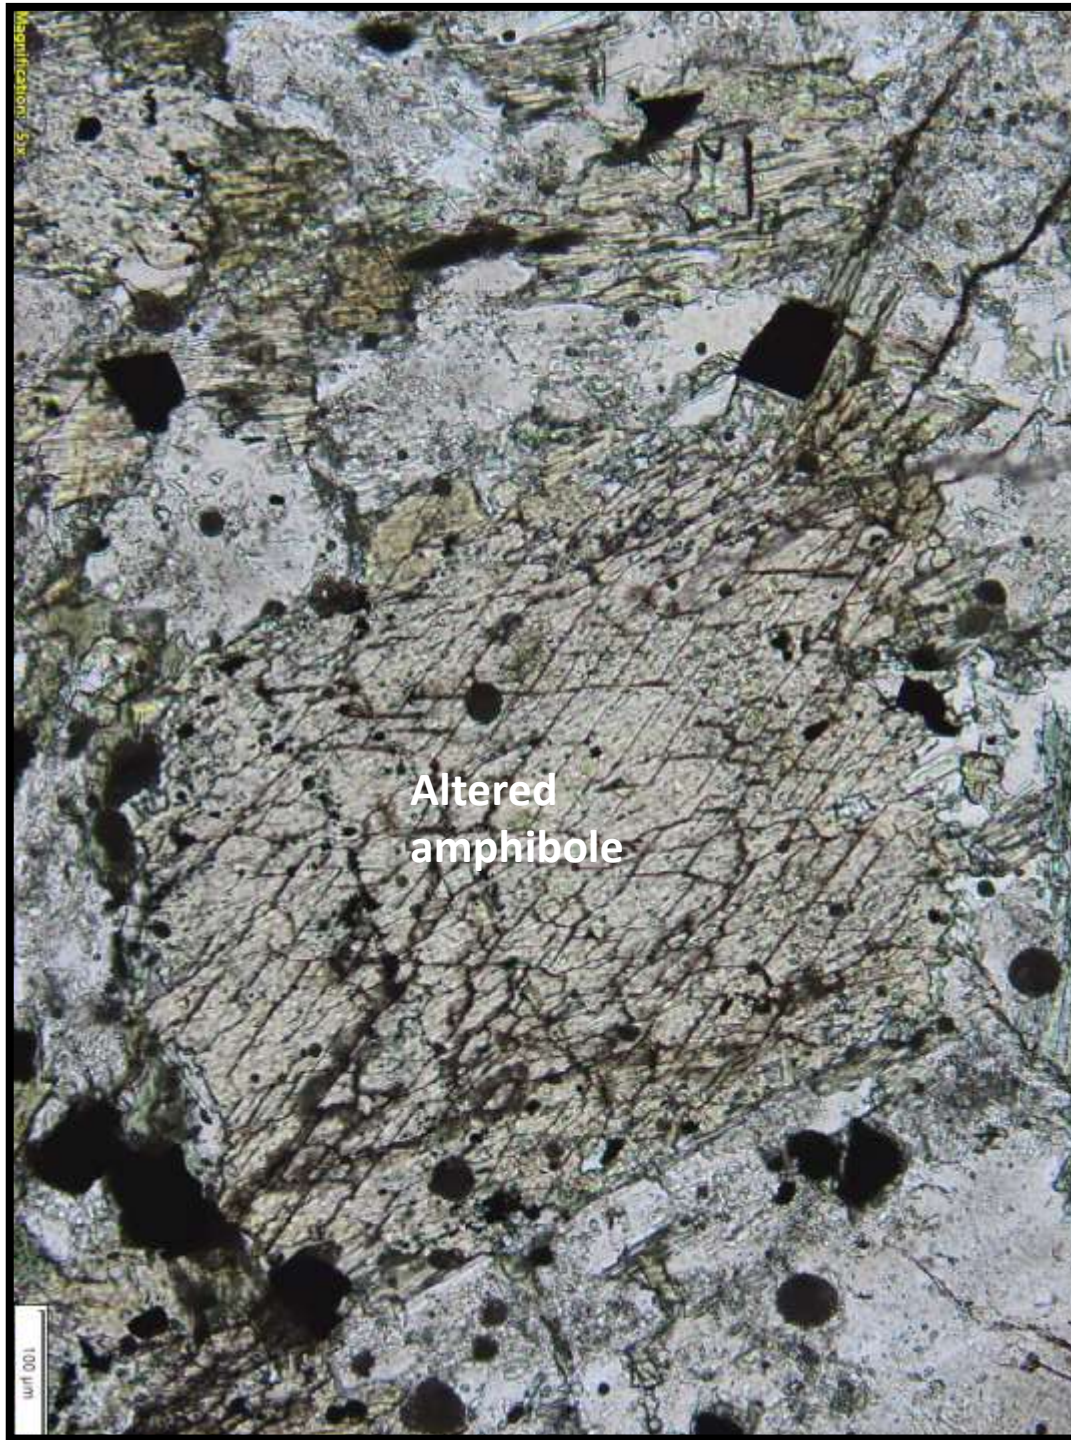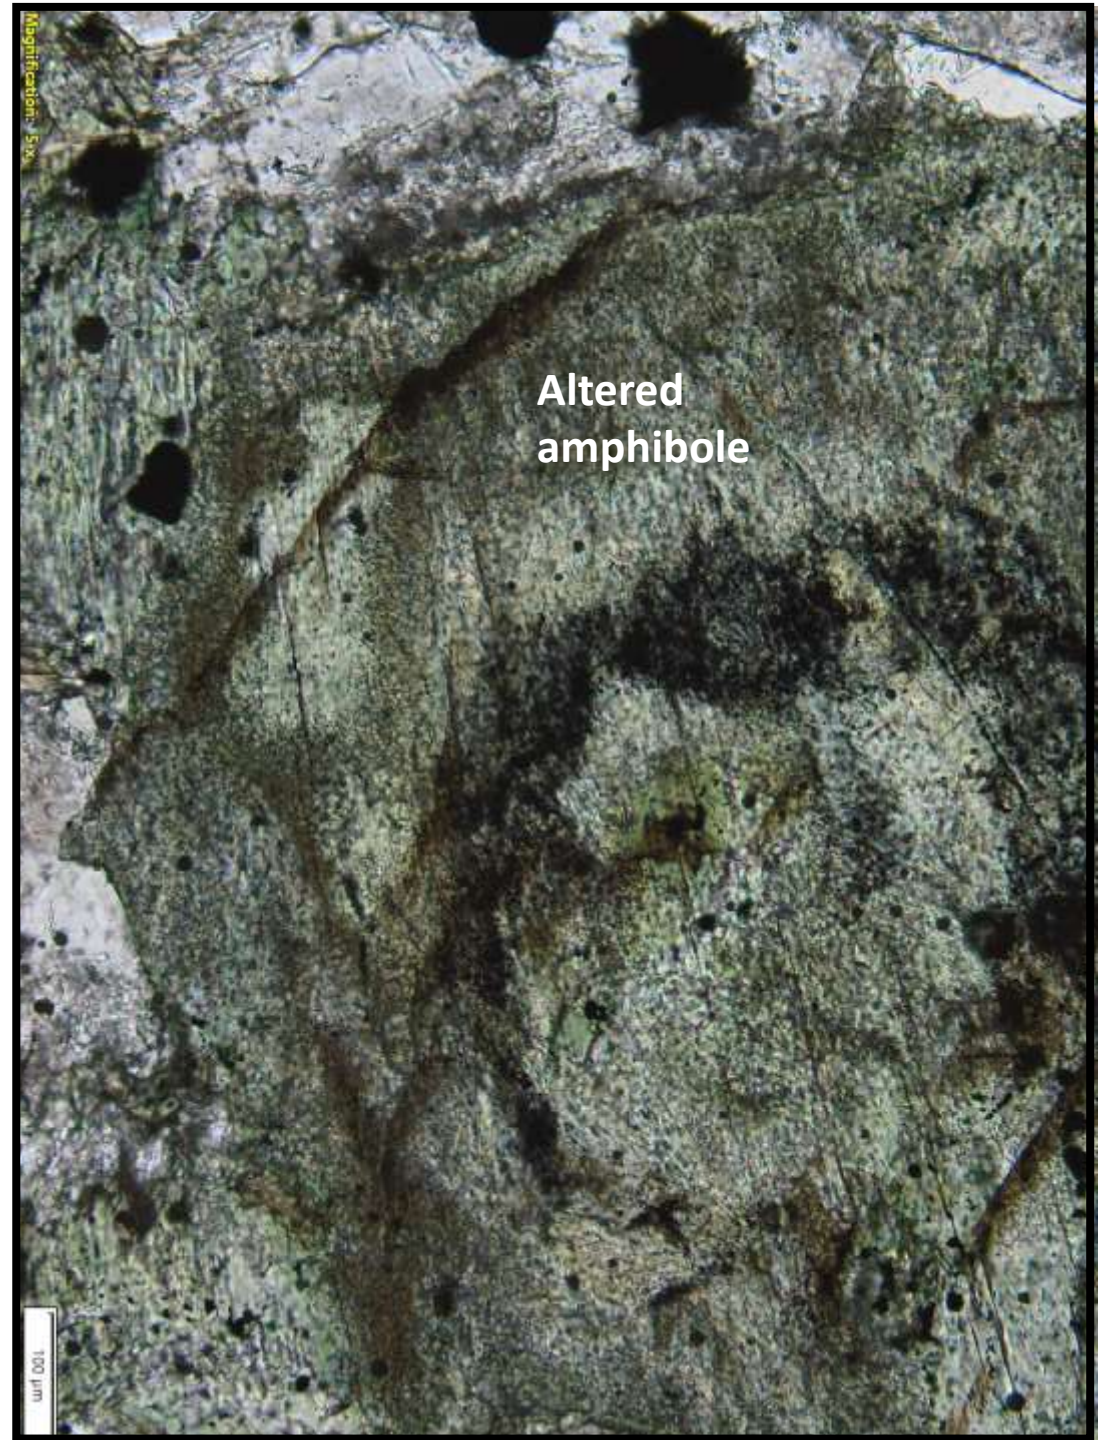



TR15

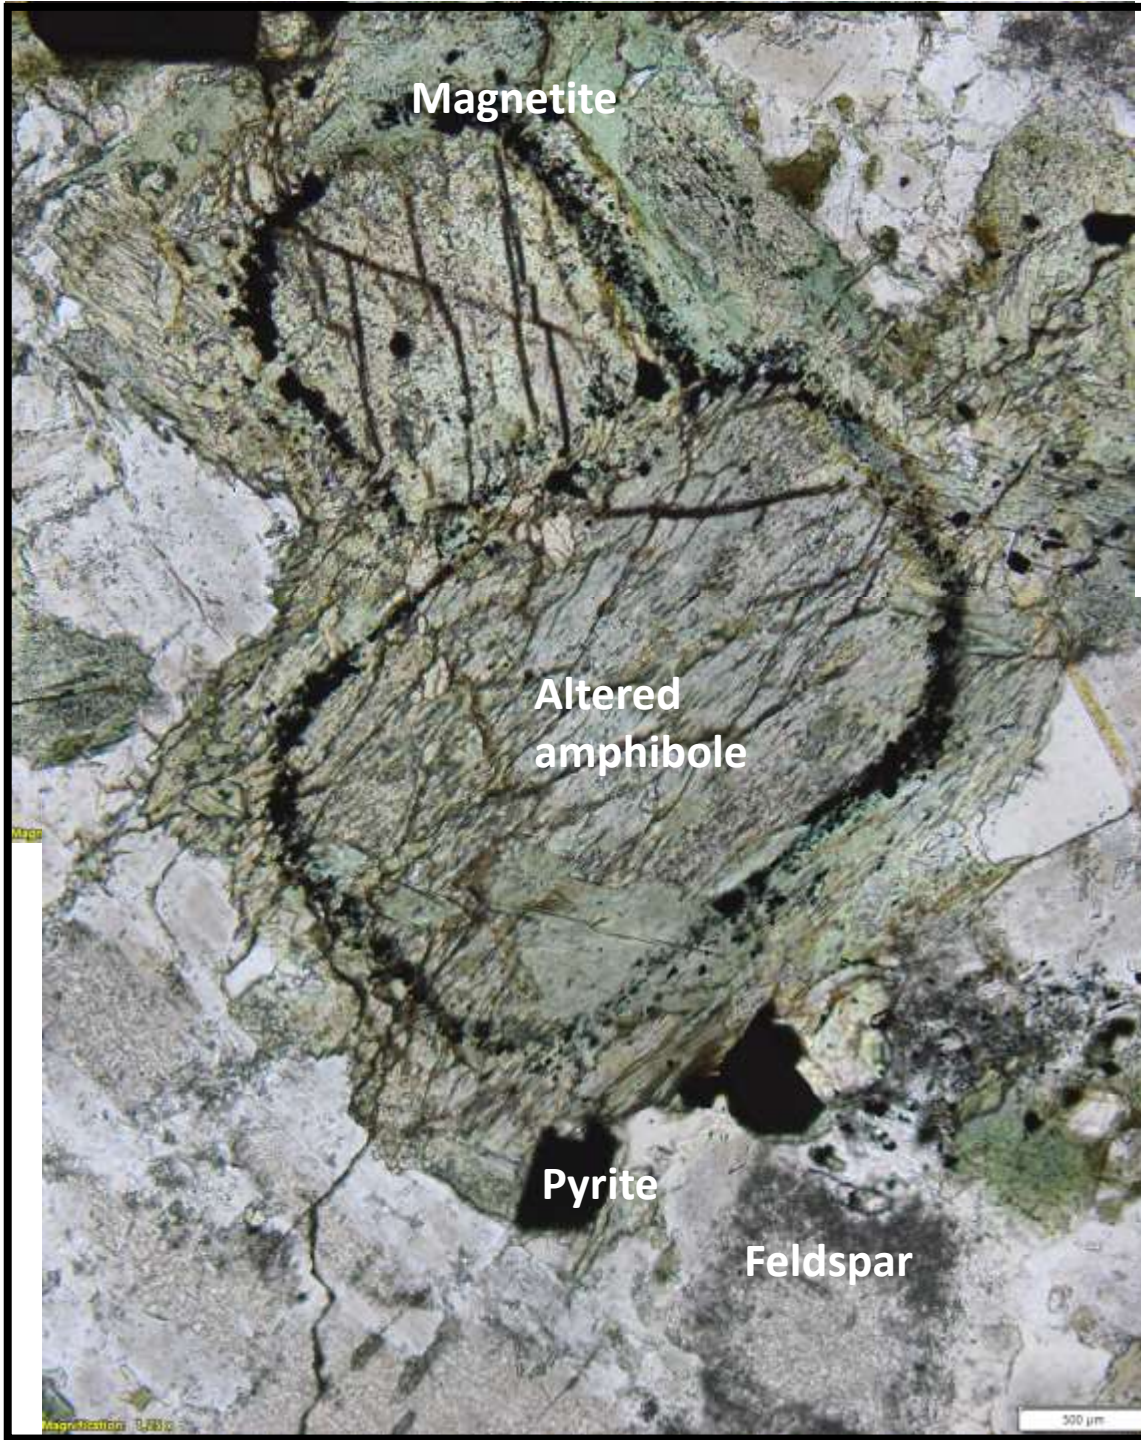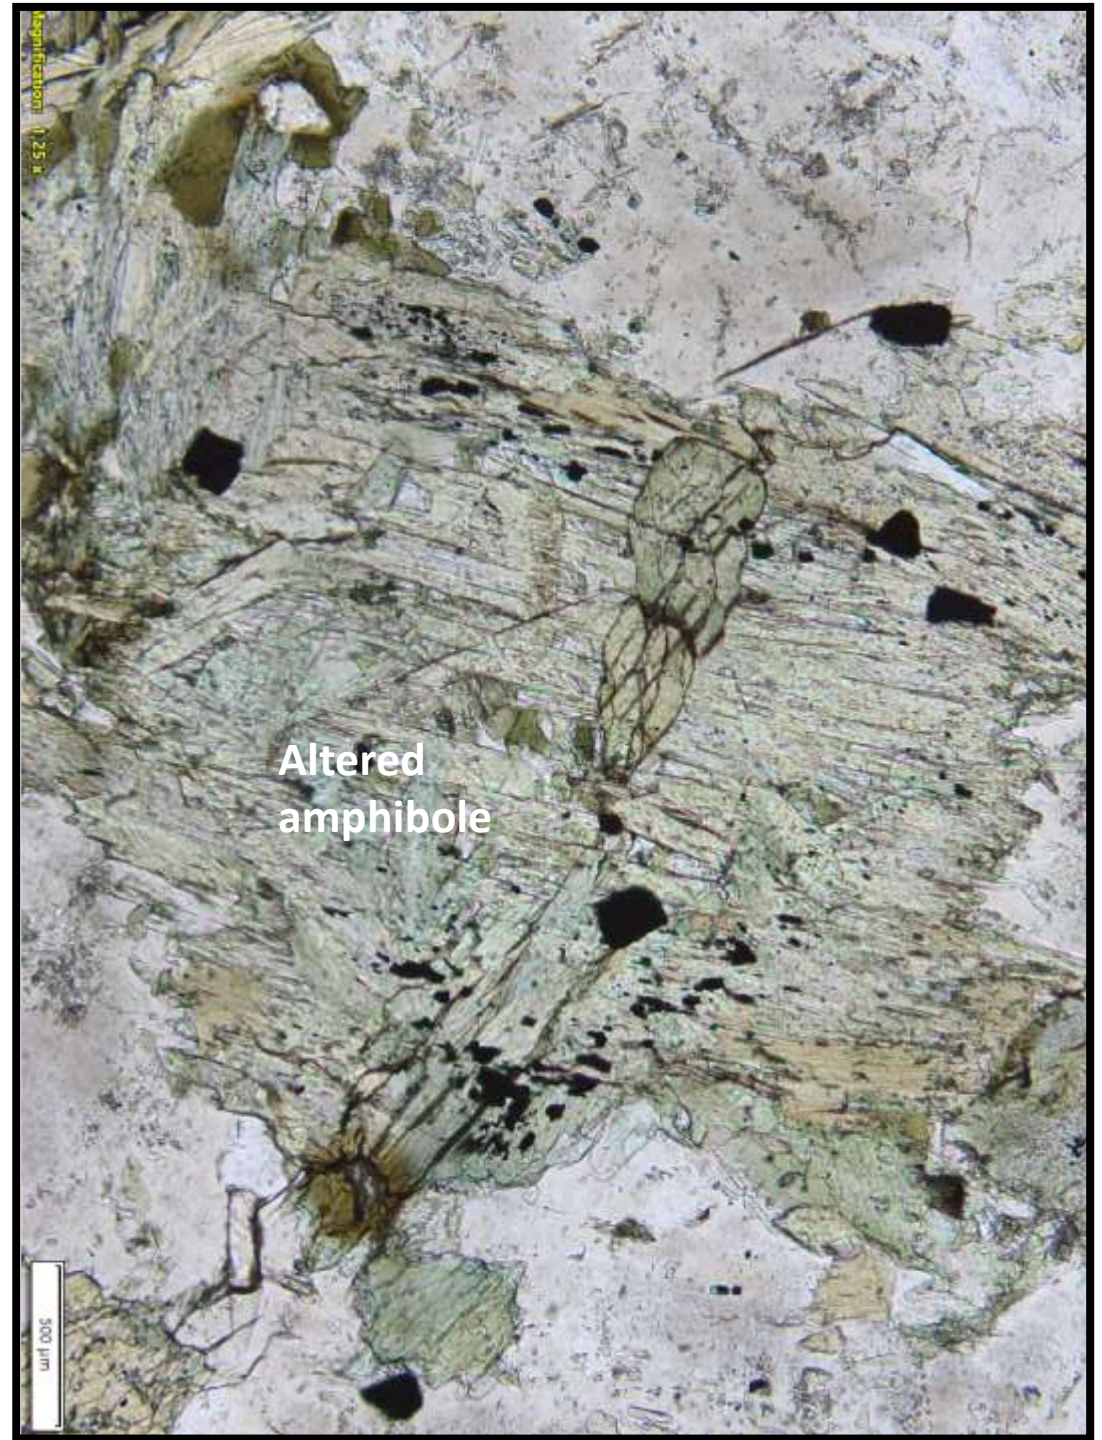



TR03

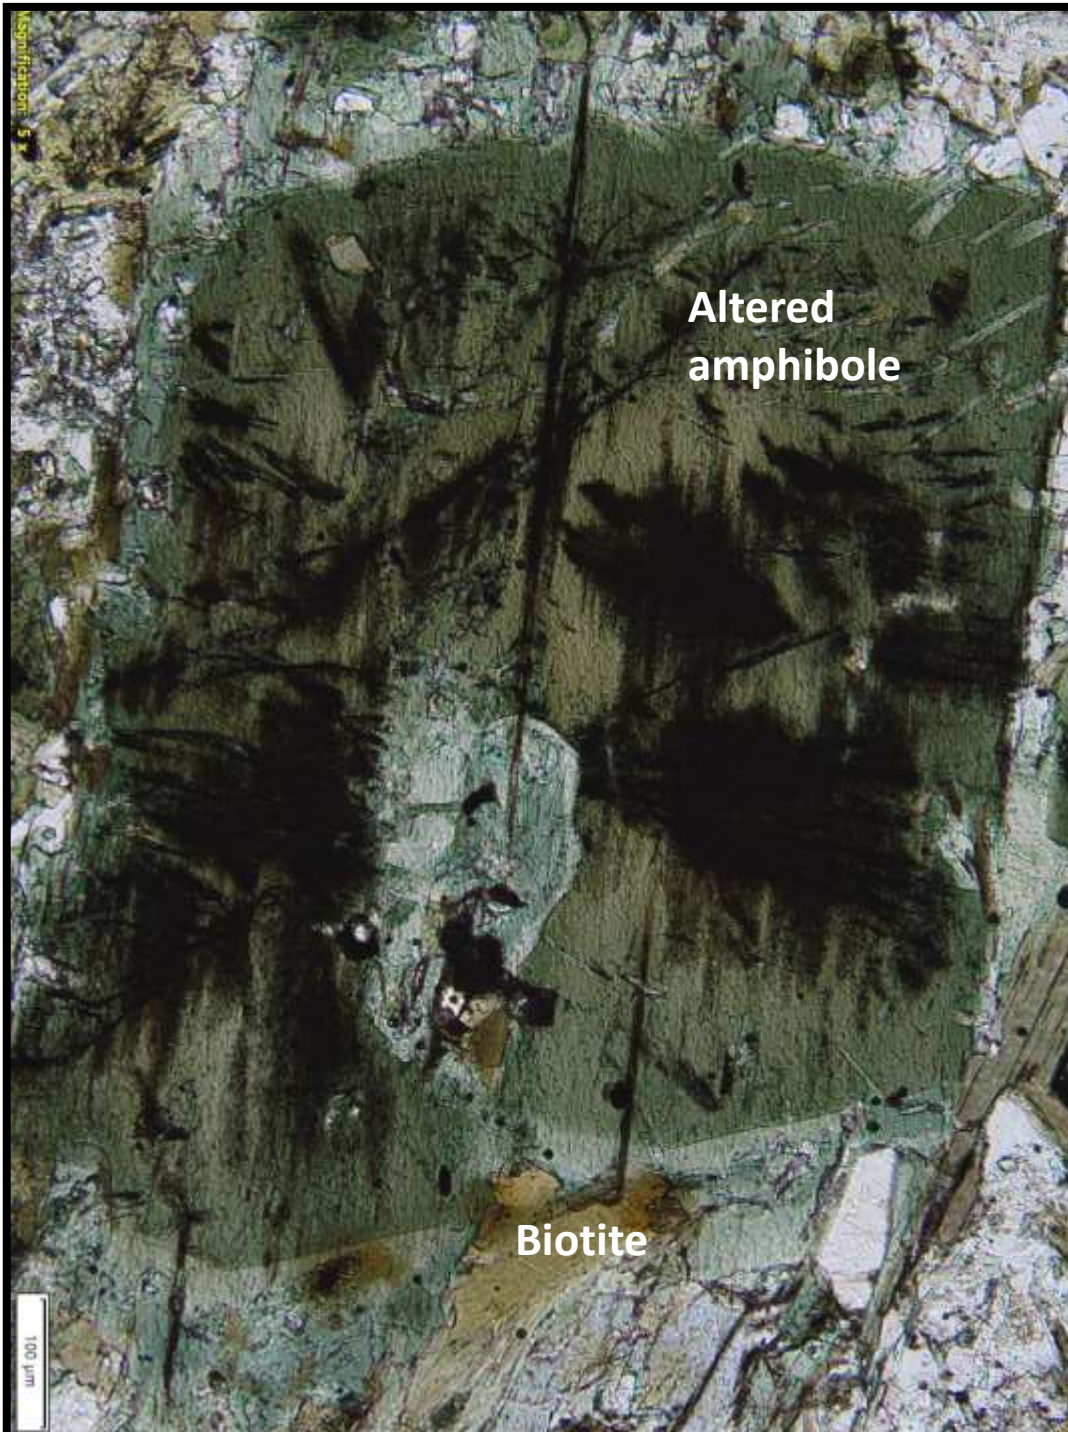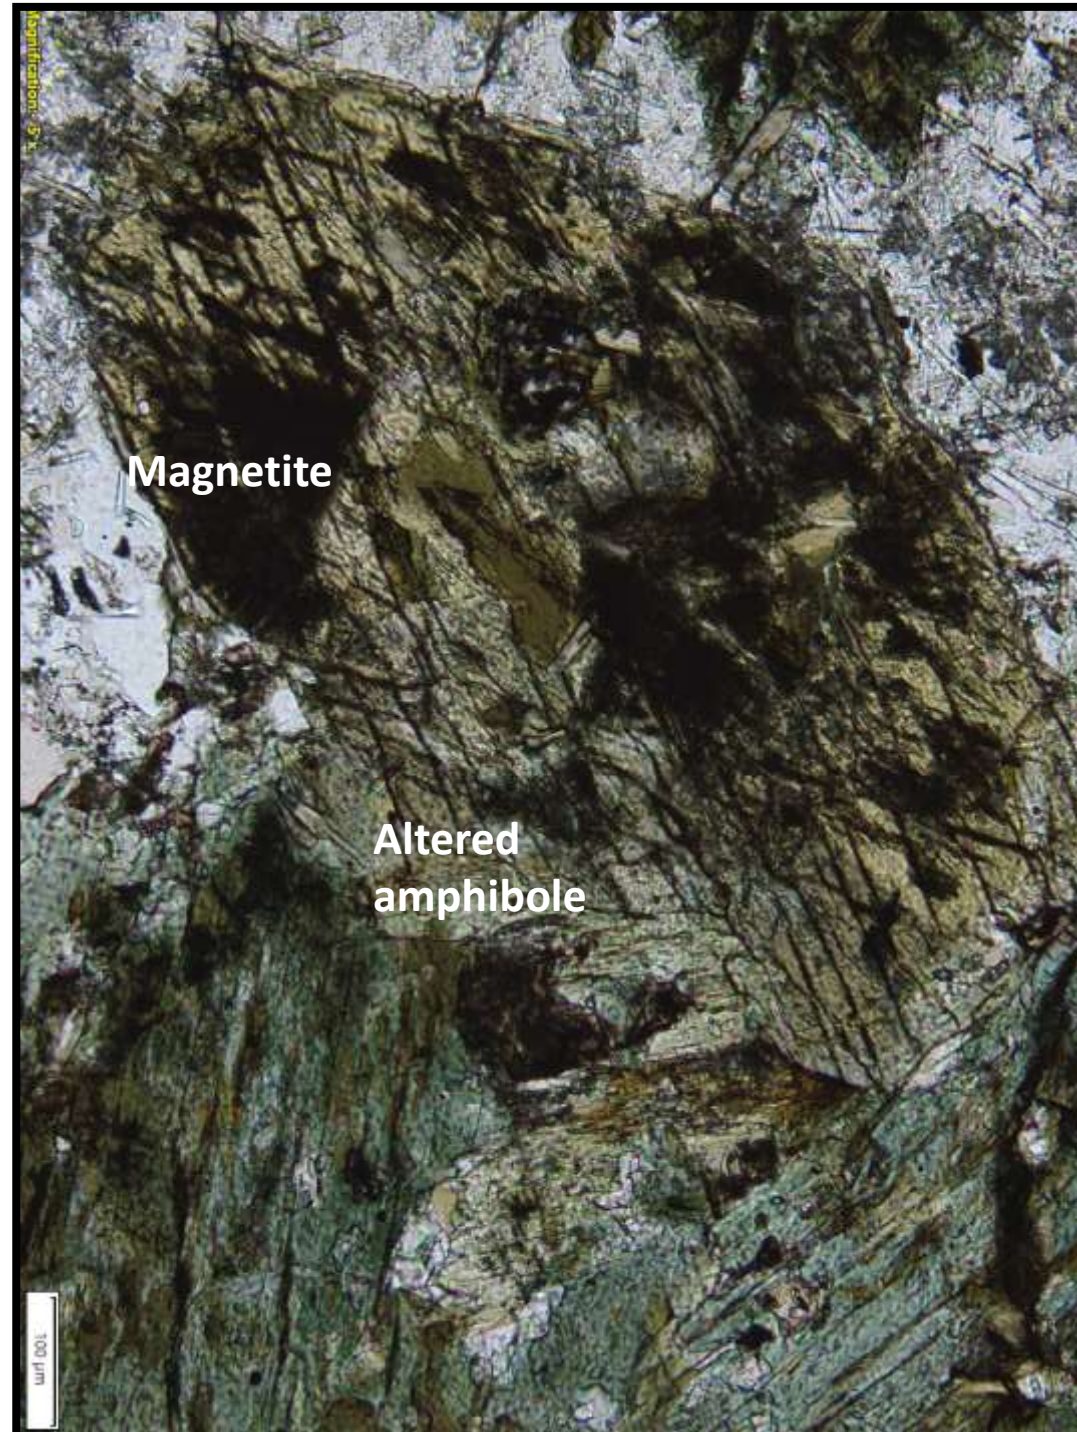



TR13

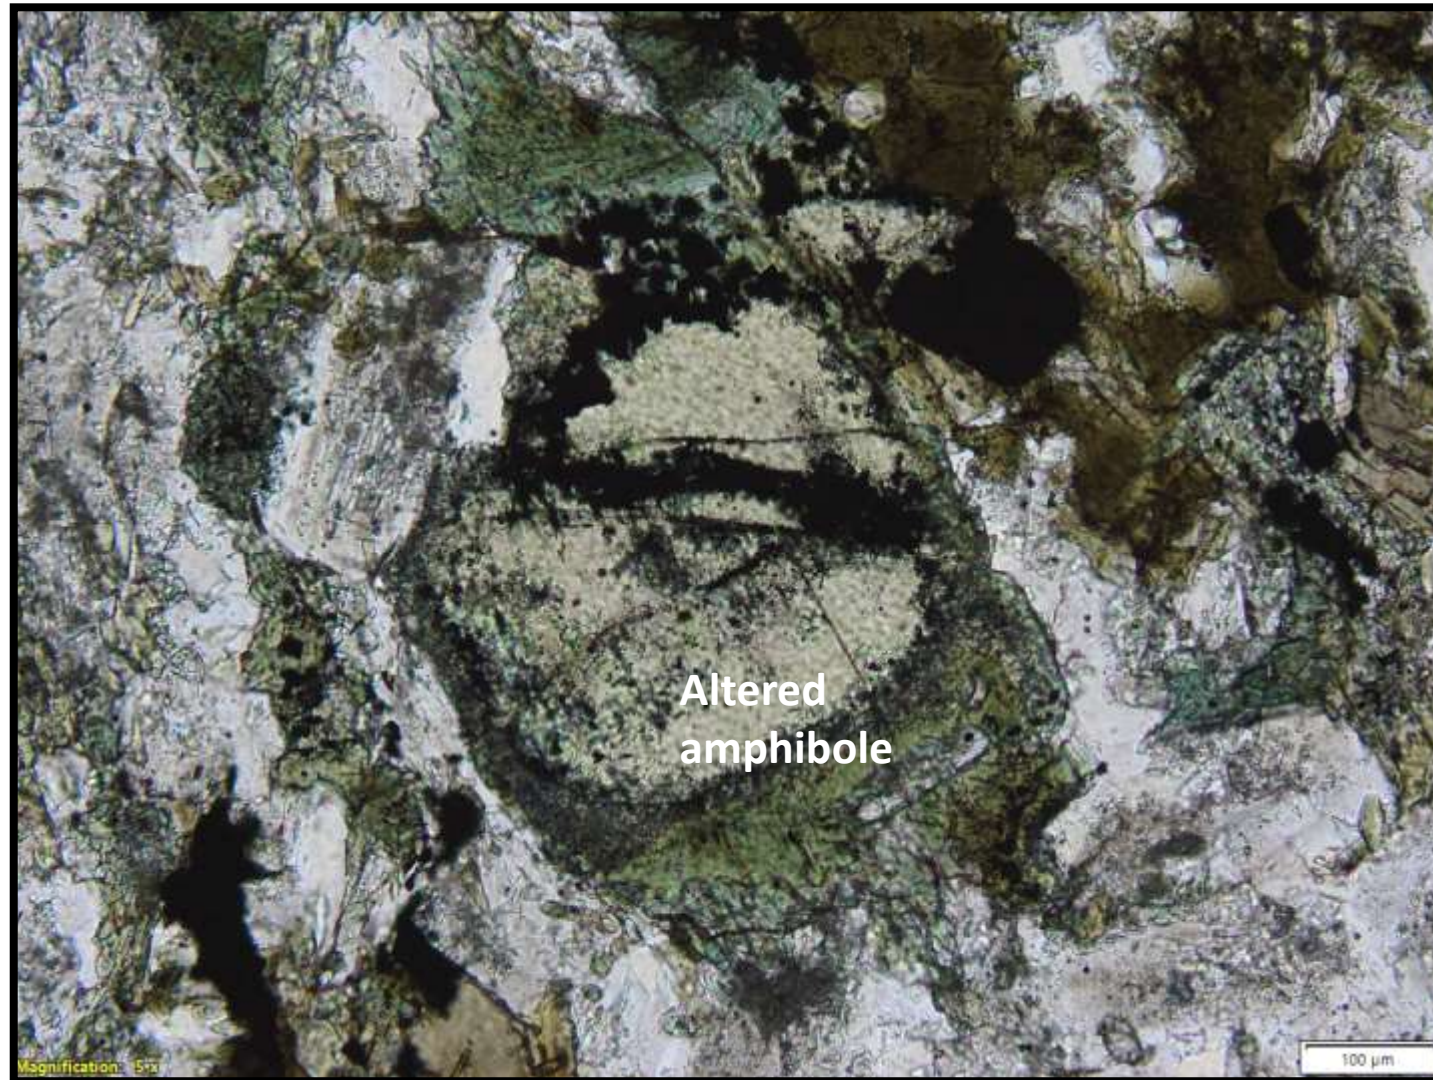



Phase 1c samples

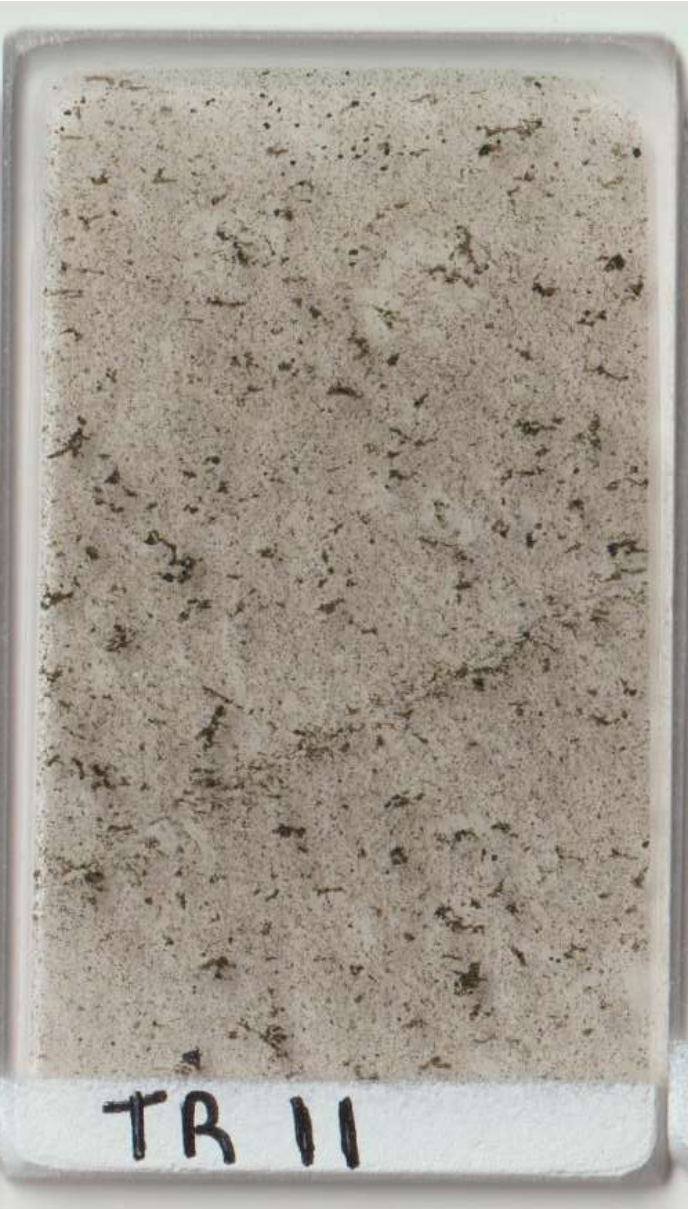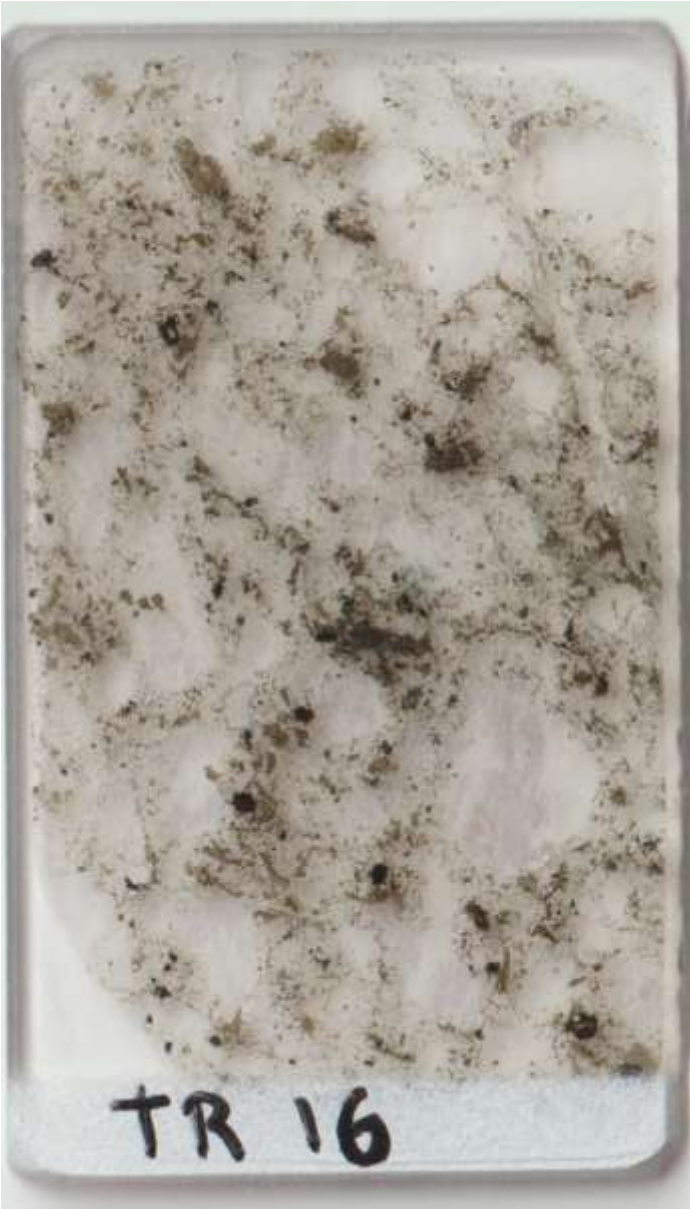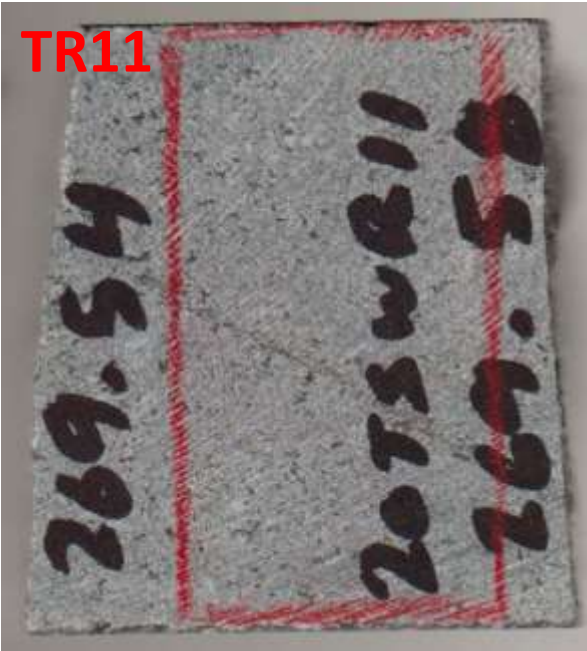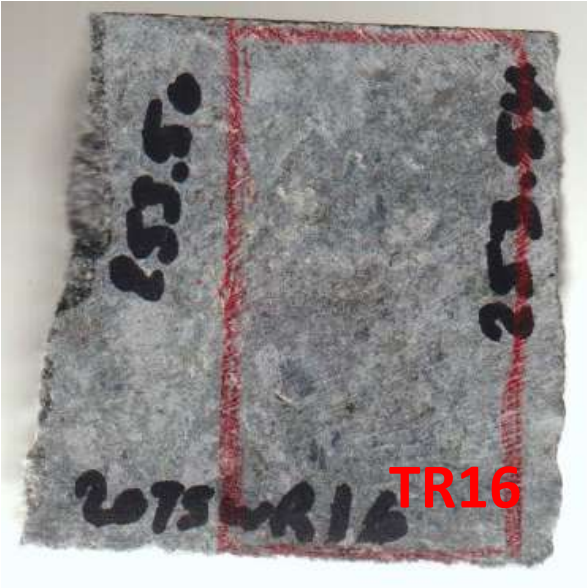



Phase 1c samples

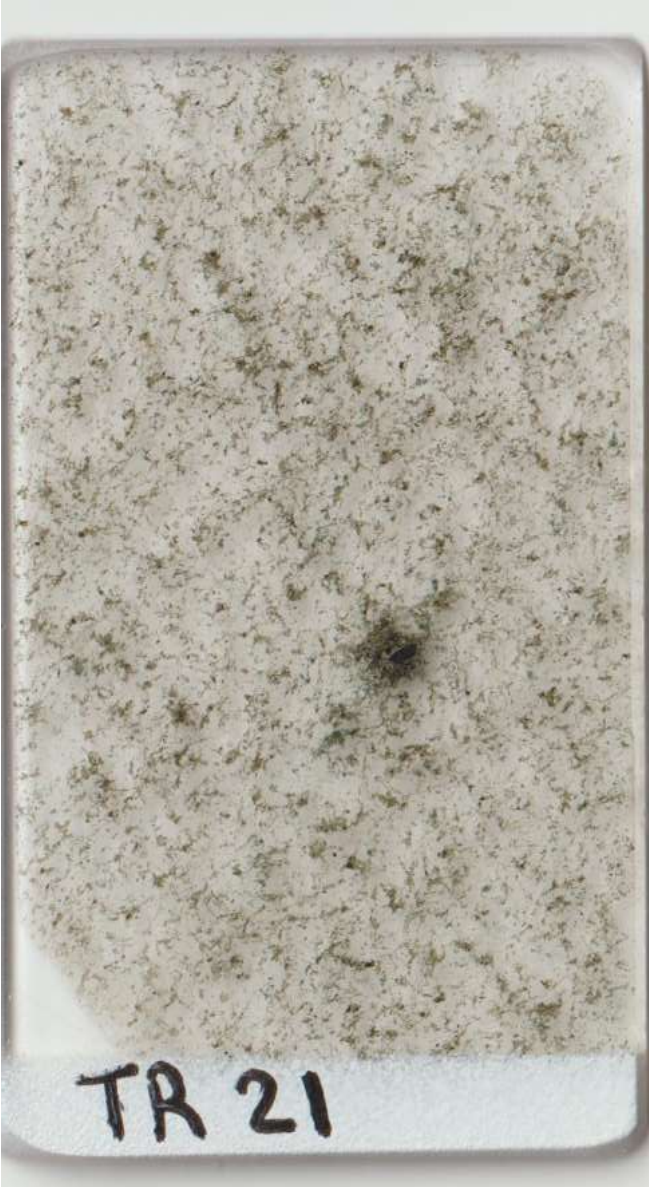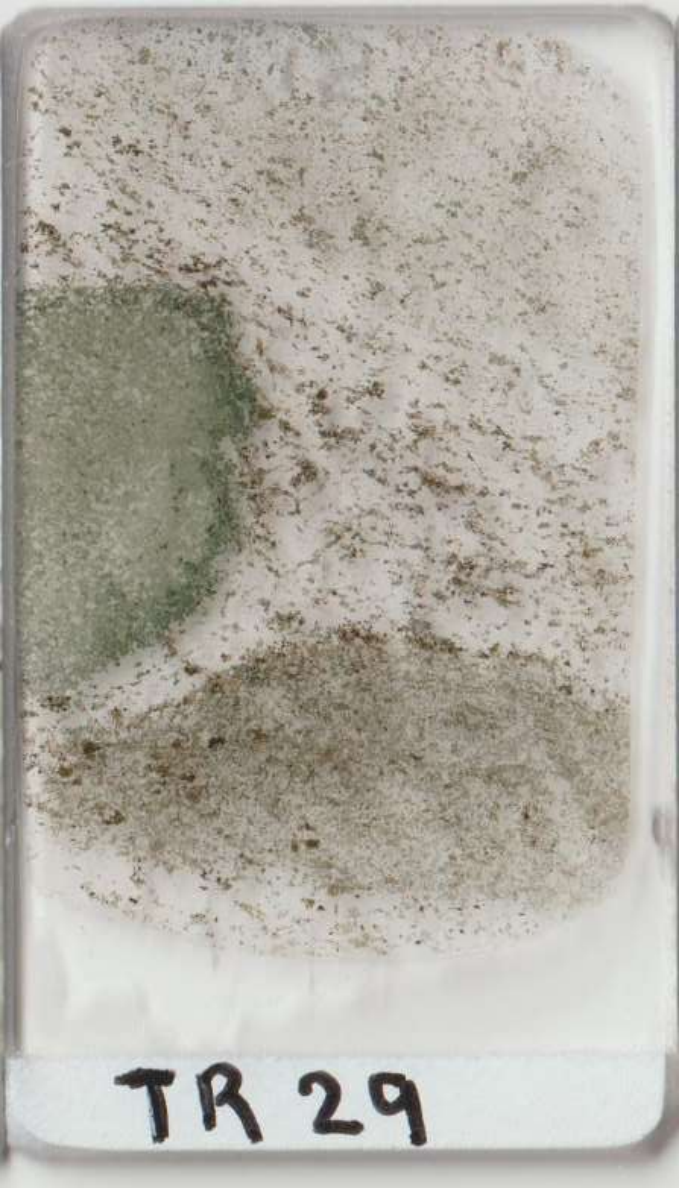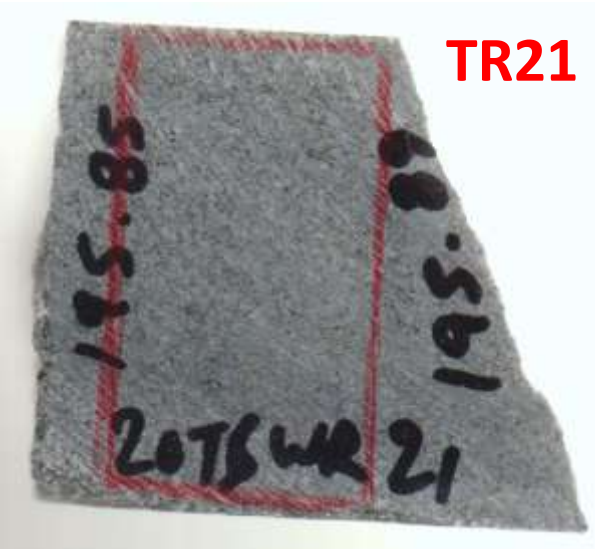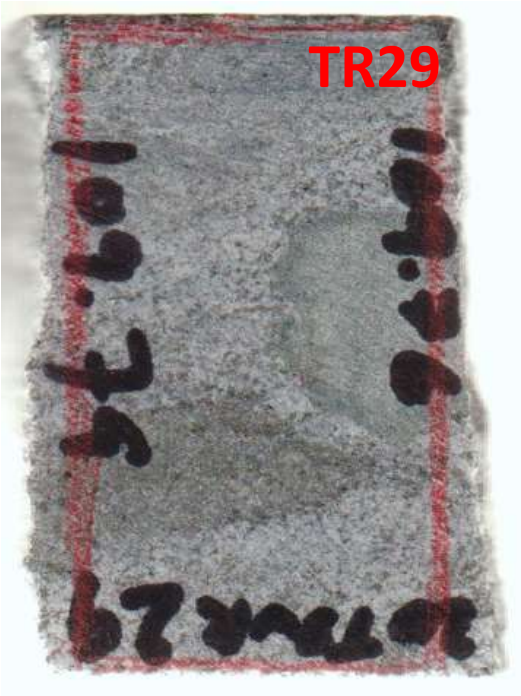



TR21

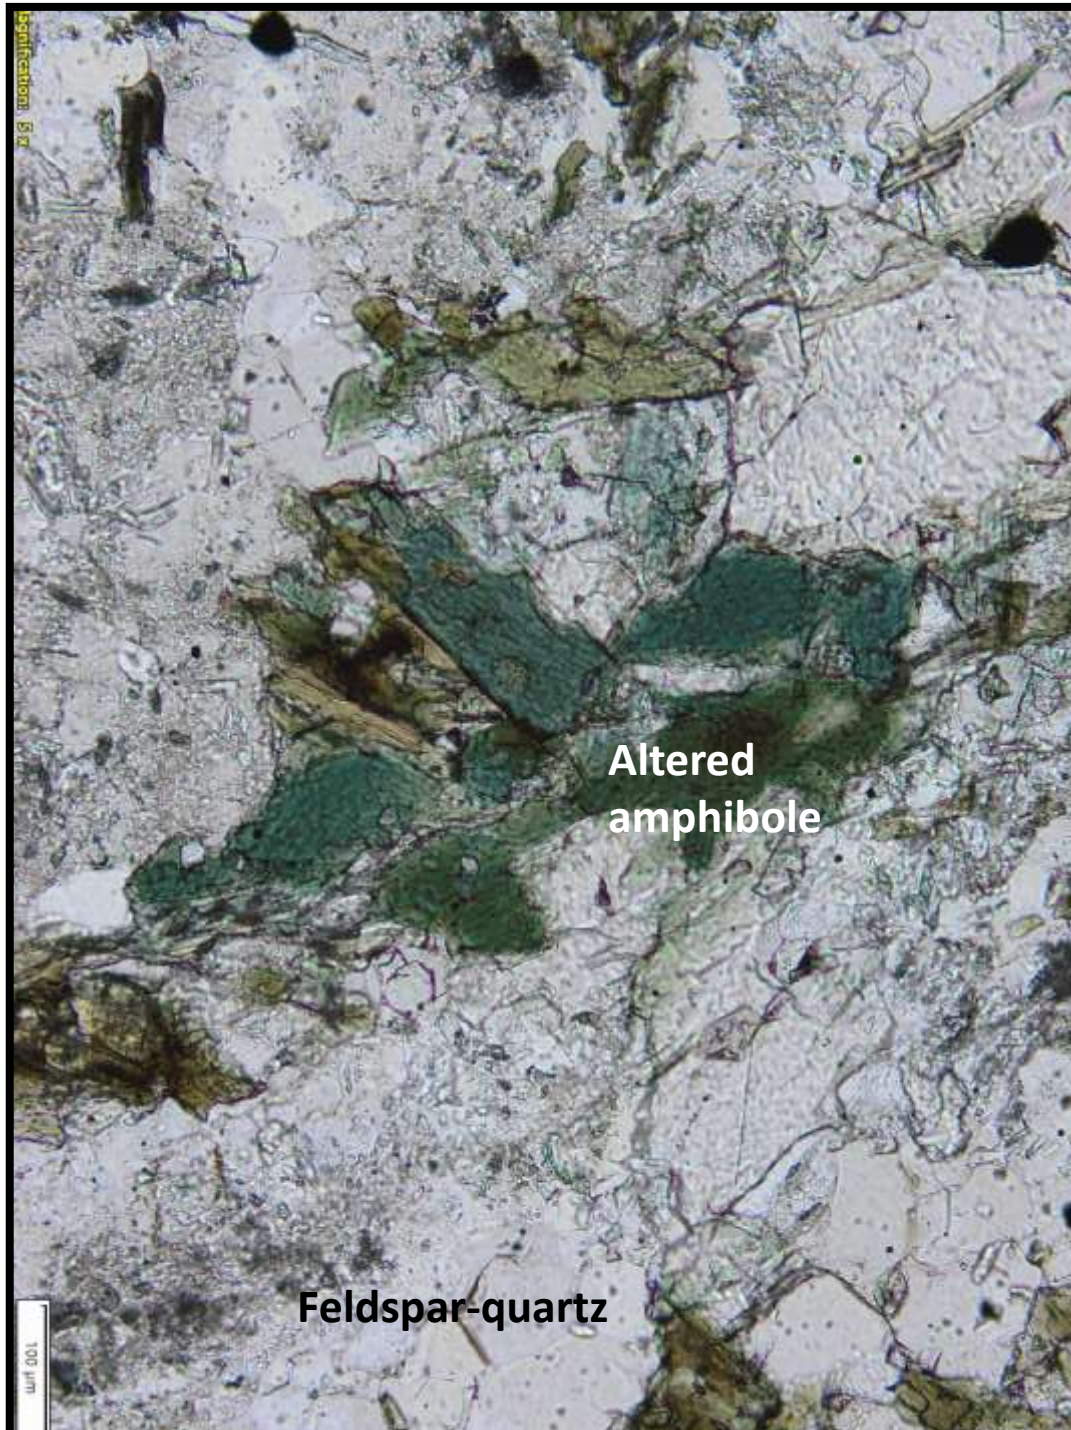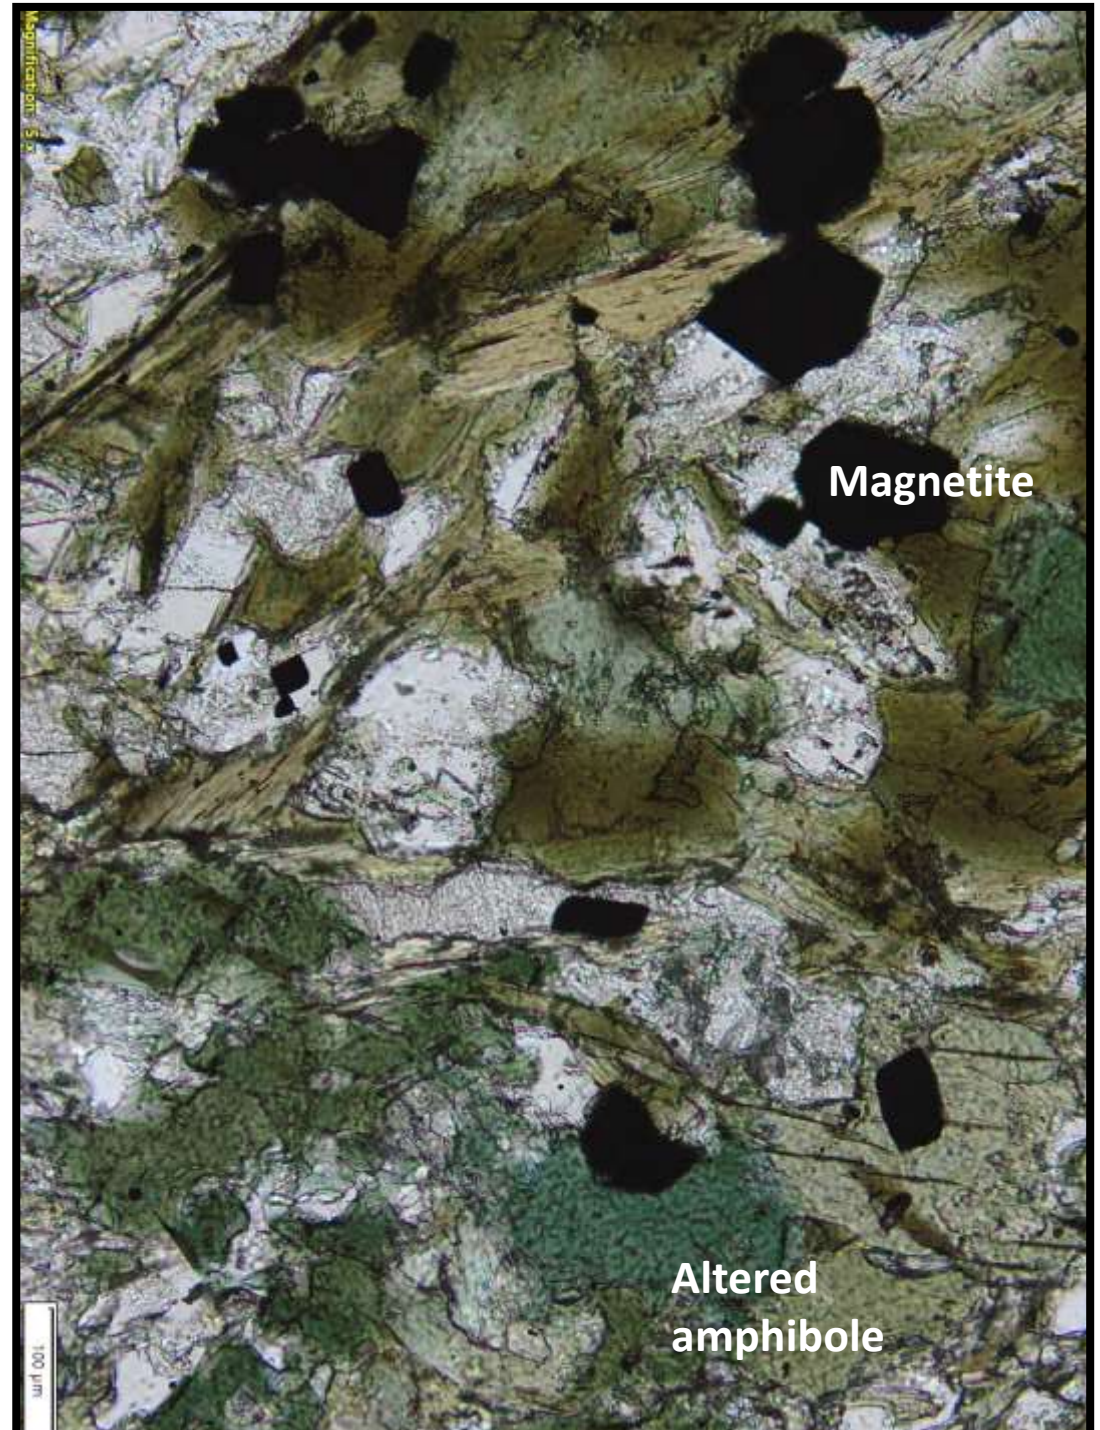



TR29

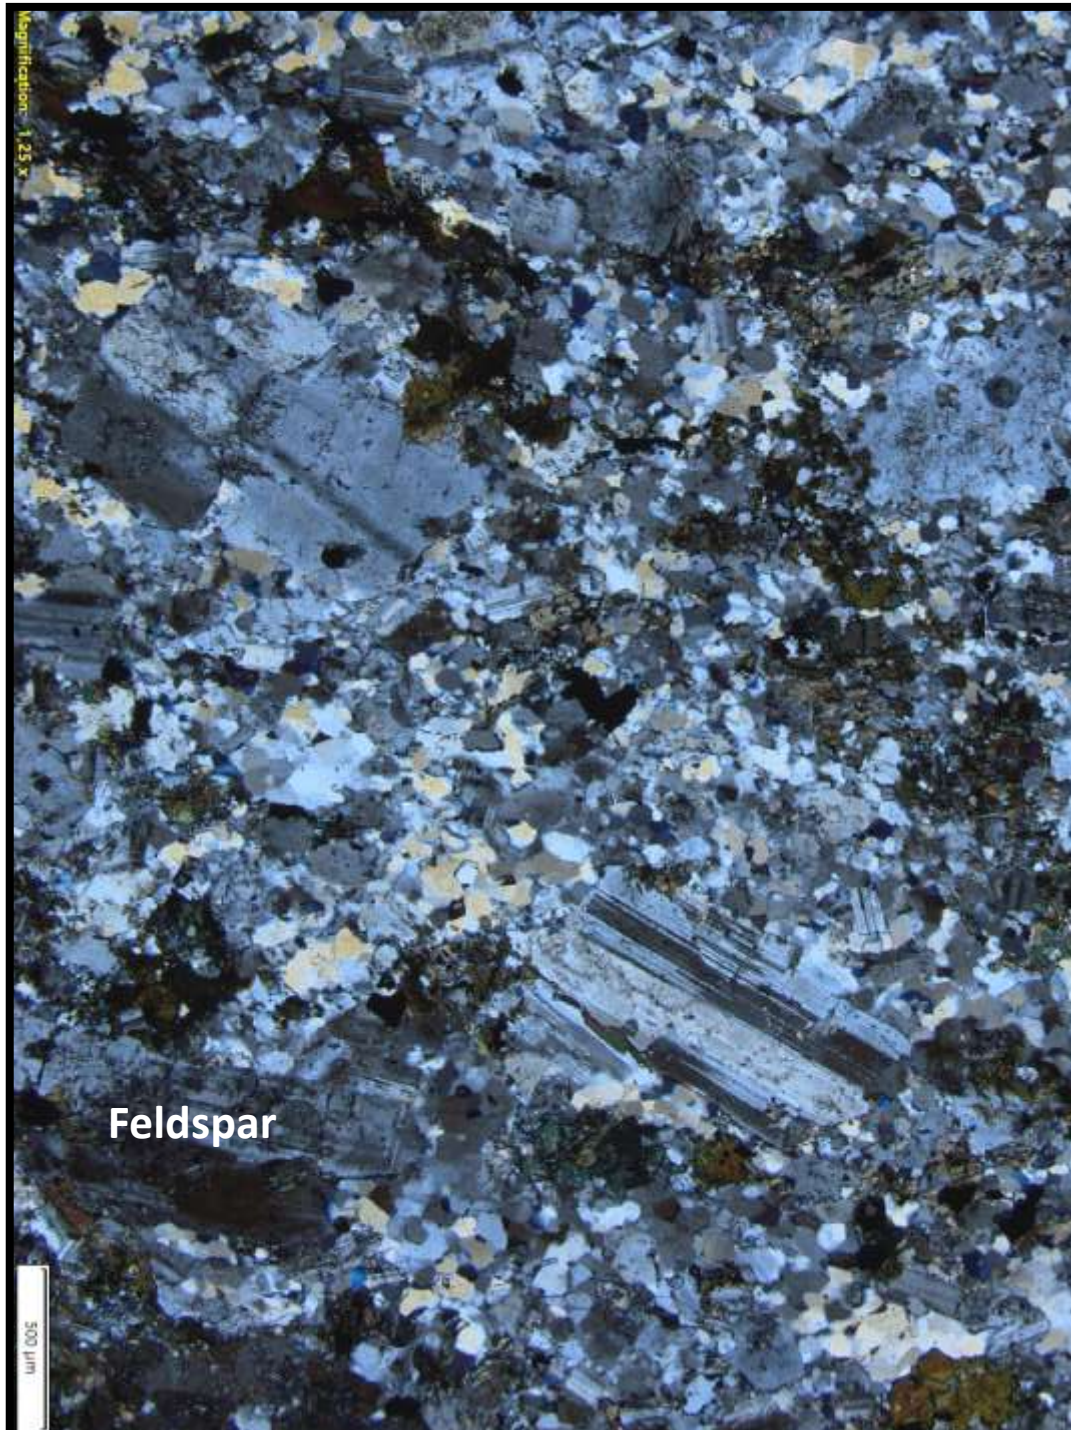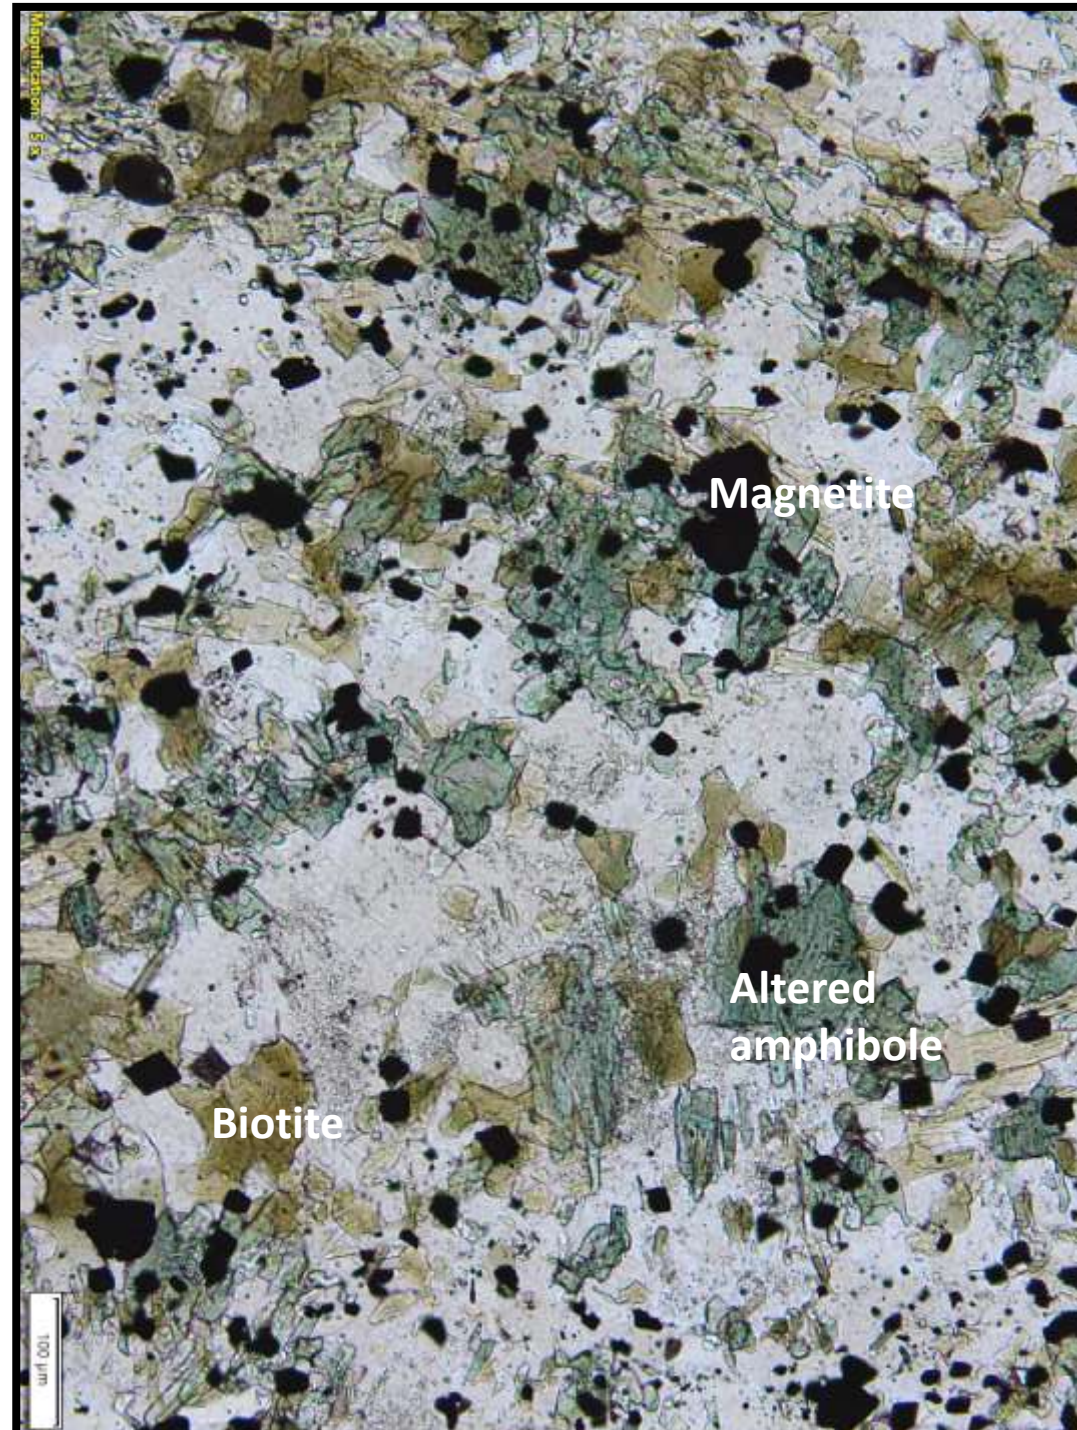

Supplement: s1 [file s1]
