# Supplementary material
Source: MDPI journal article supplement (https://www.mdpi.com/2075-163X/12/2/128)

Supplementary material S6 for the following article:

**Petrography of the intrusive rocks at the diorite-hosted Regnault Au mineralization**

**by L. Mathieu, F. MacDonald**

Journal: MDPI – Minerals

**Information.** Diorite and other samples observed in backscattered secondary electrons (BSE). This document contains images that complete Figure 6.

TR03

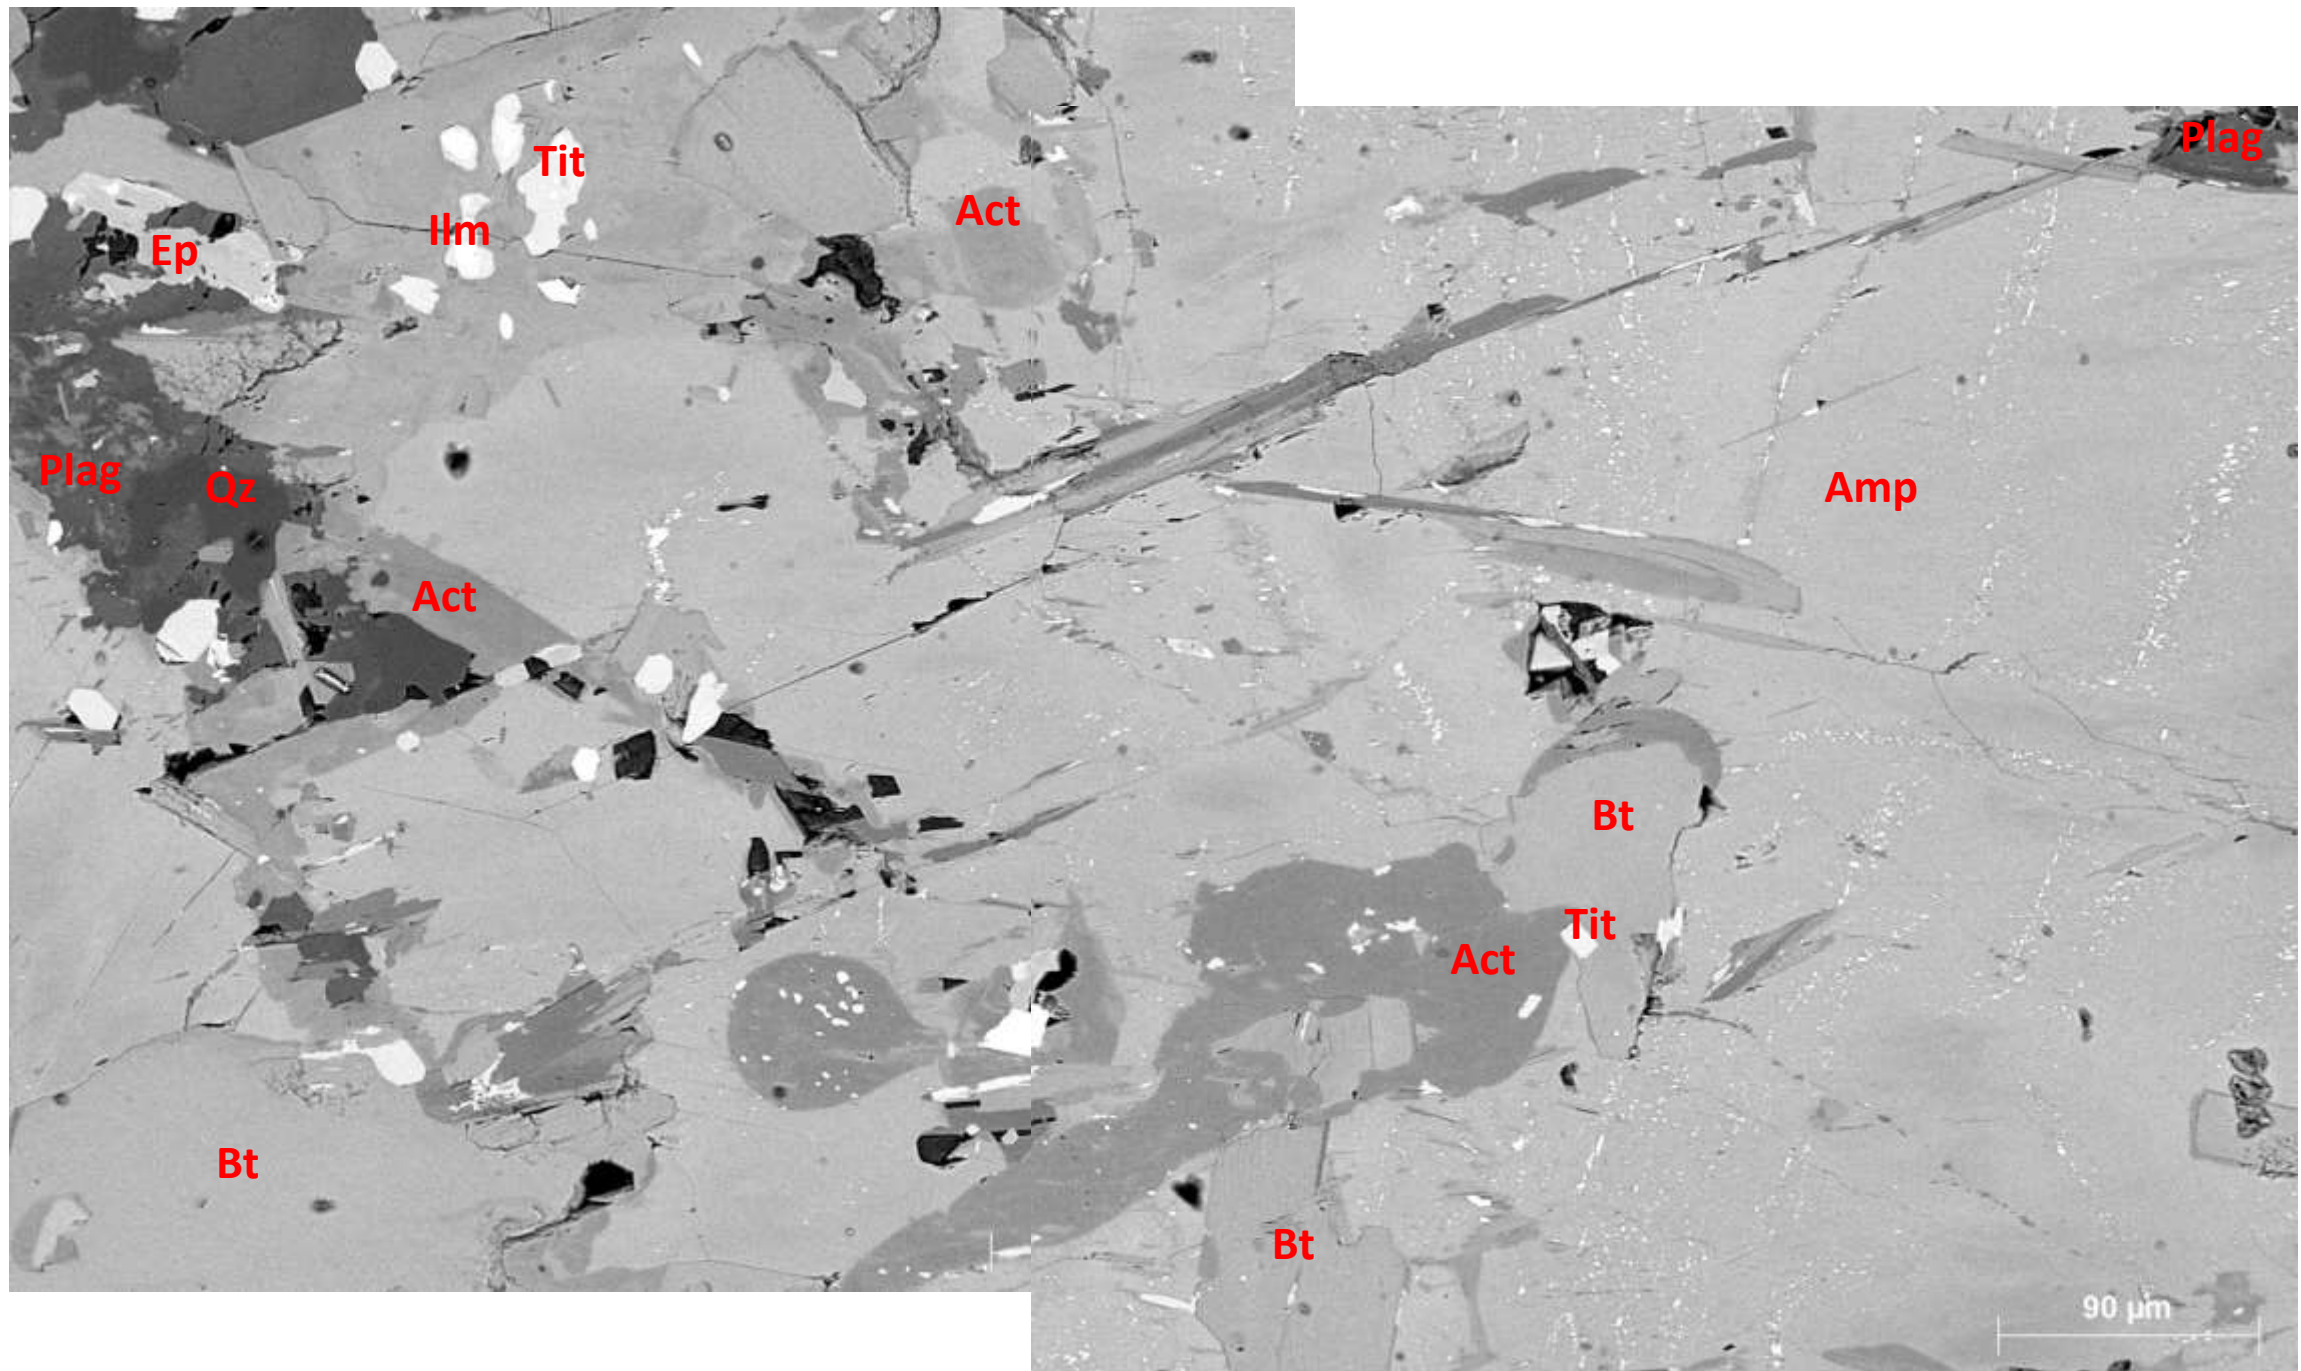

TR03

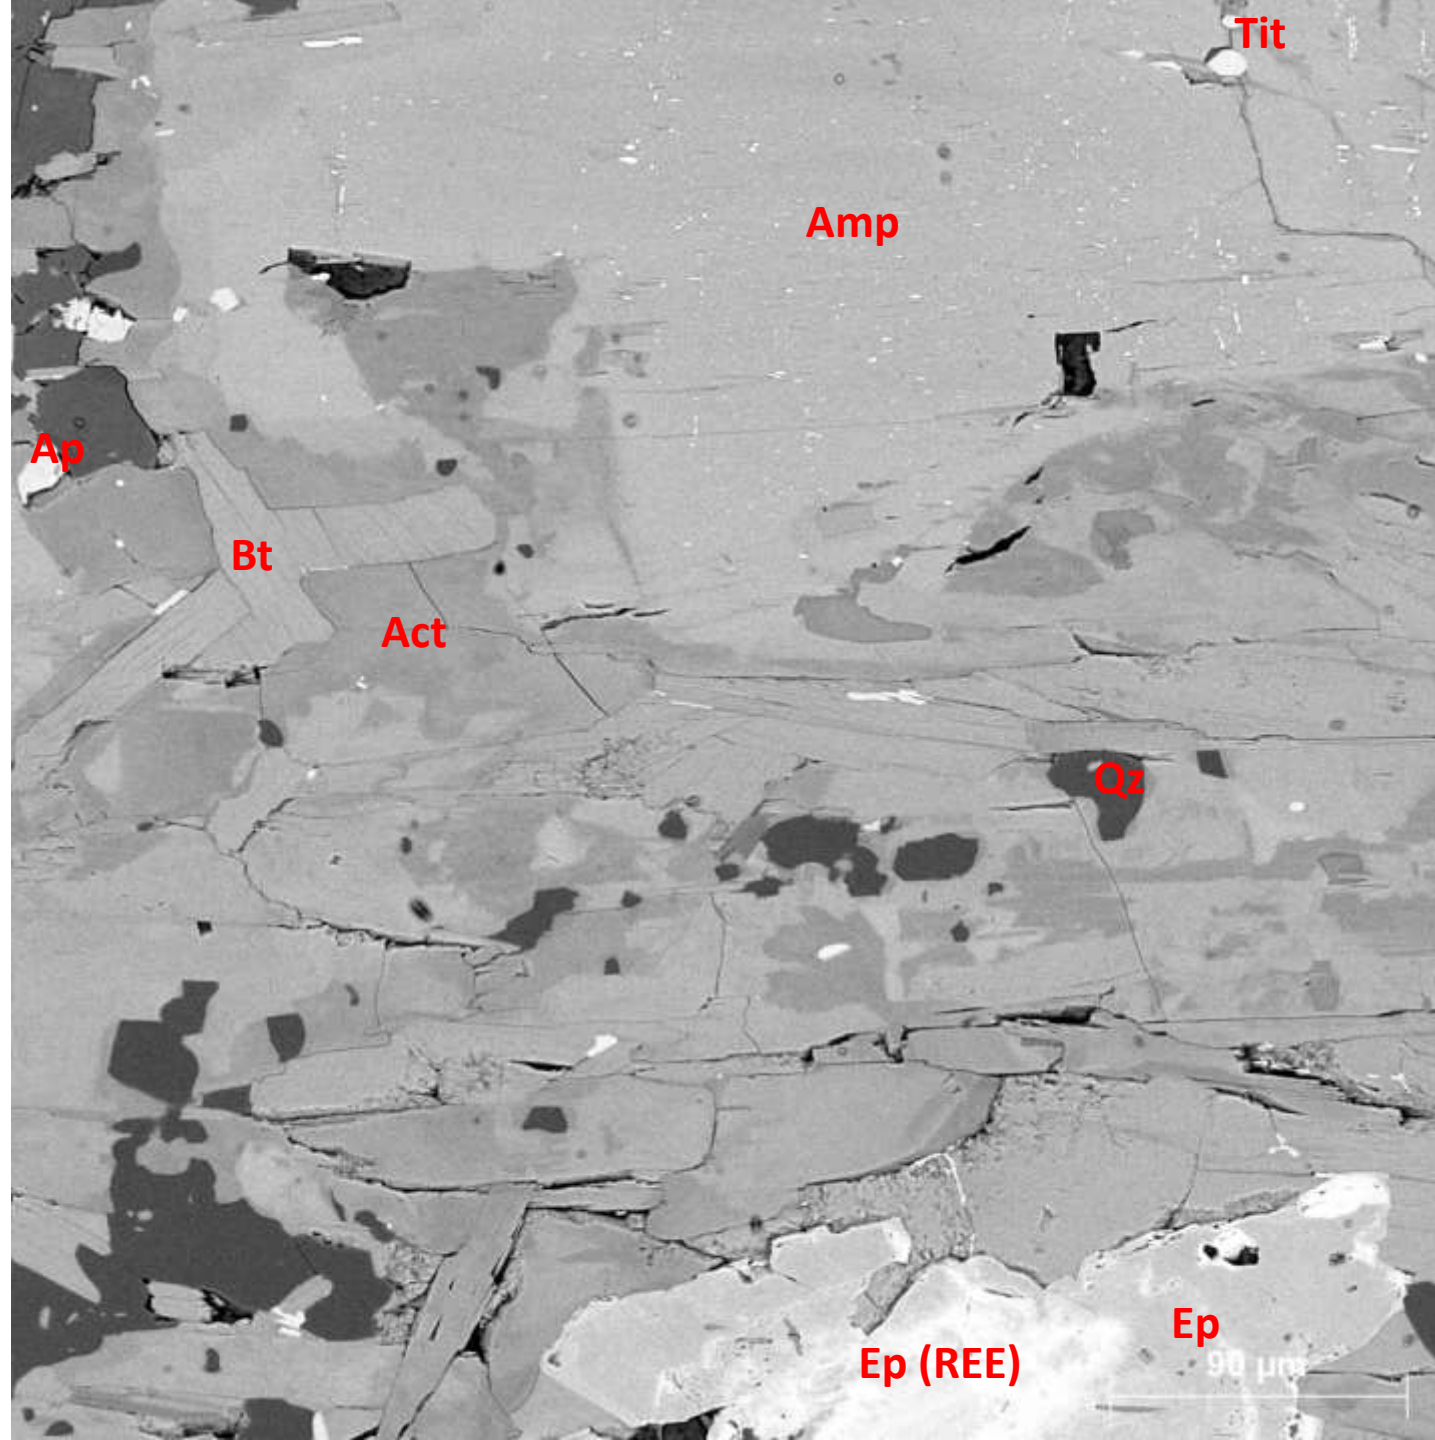



TR03

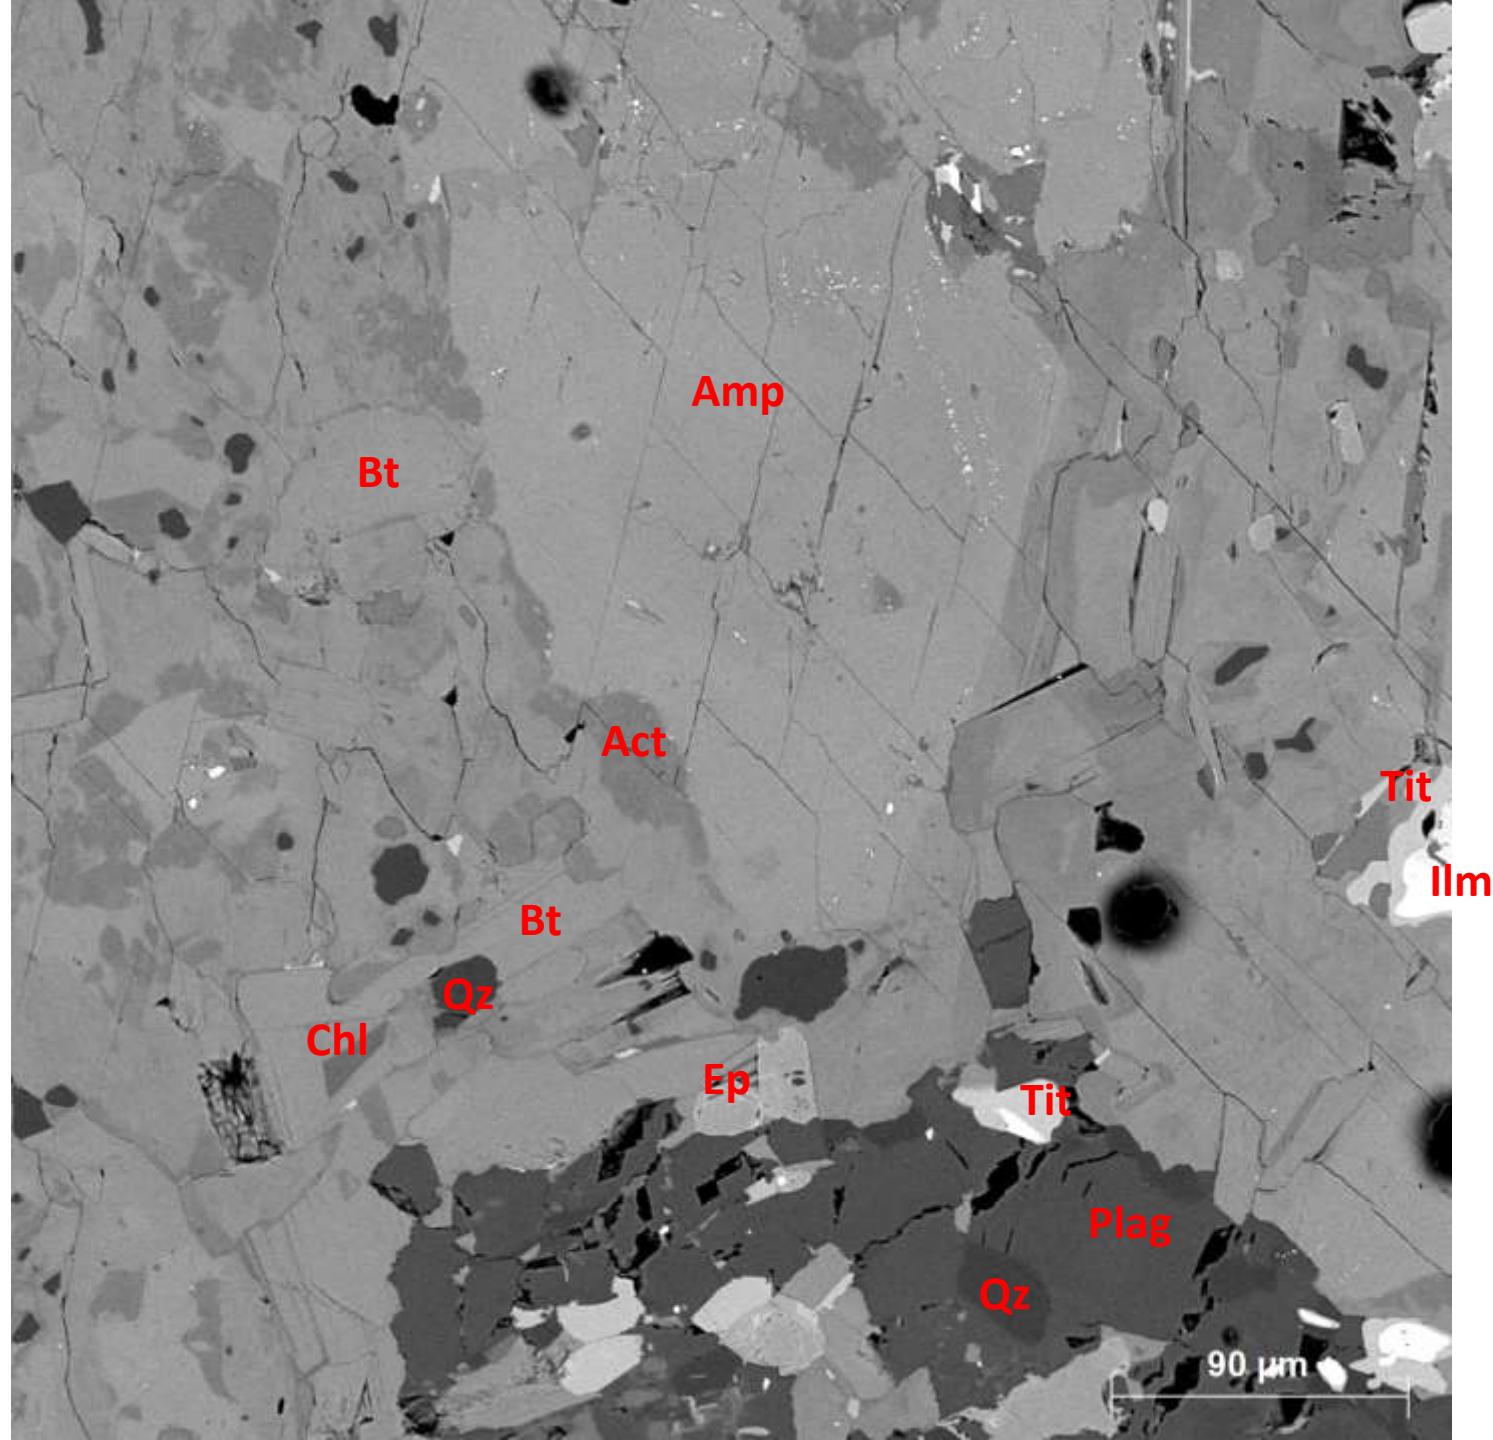

TR03

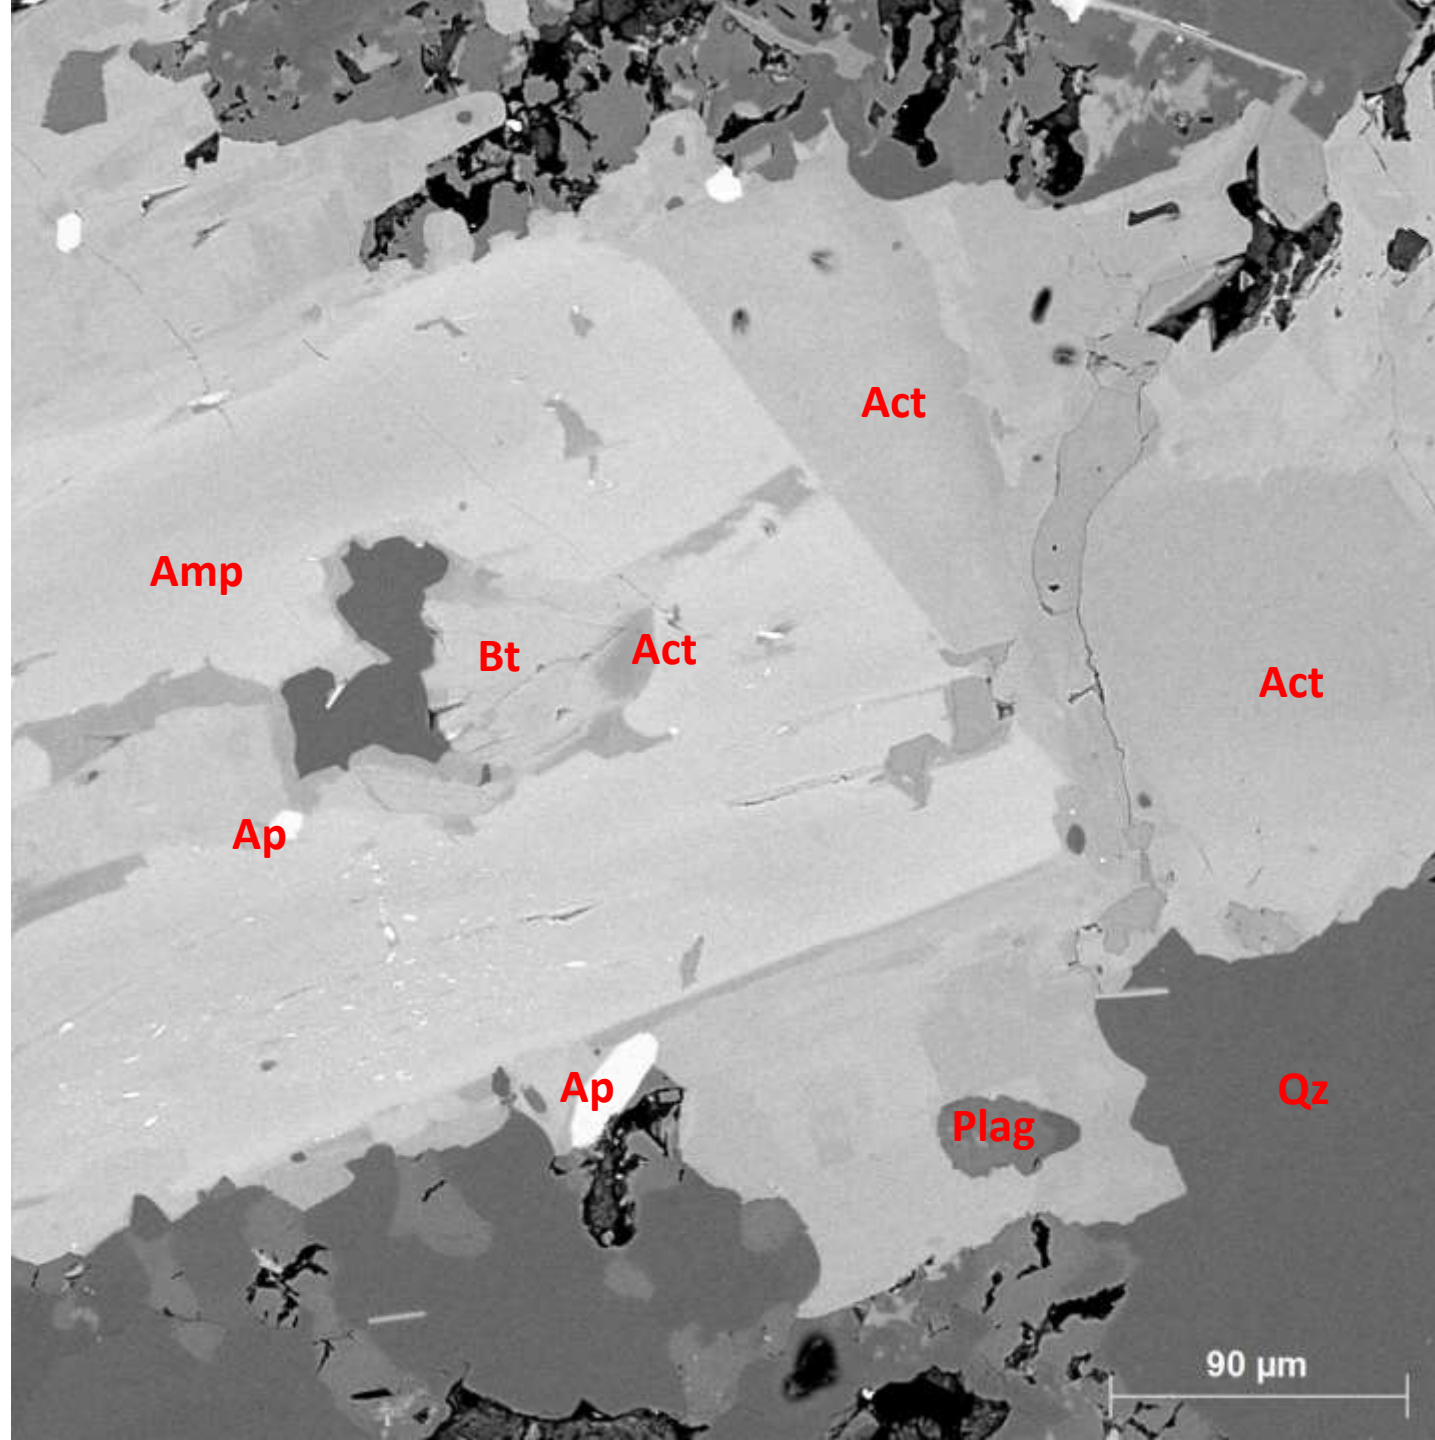

TR03

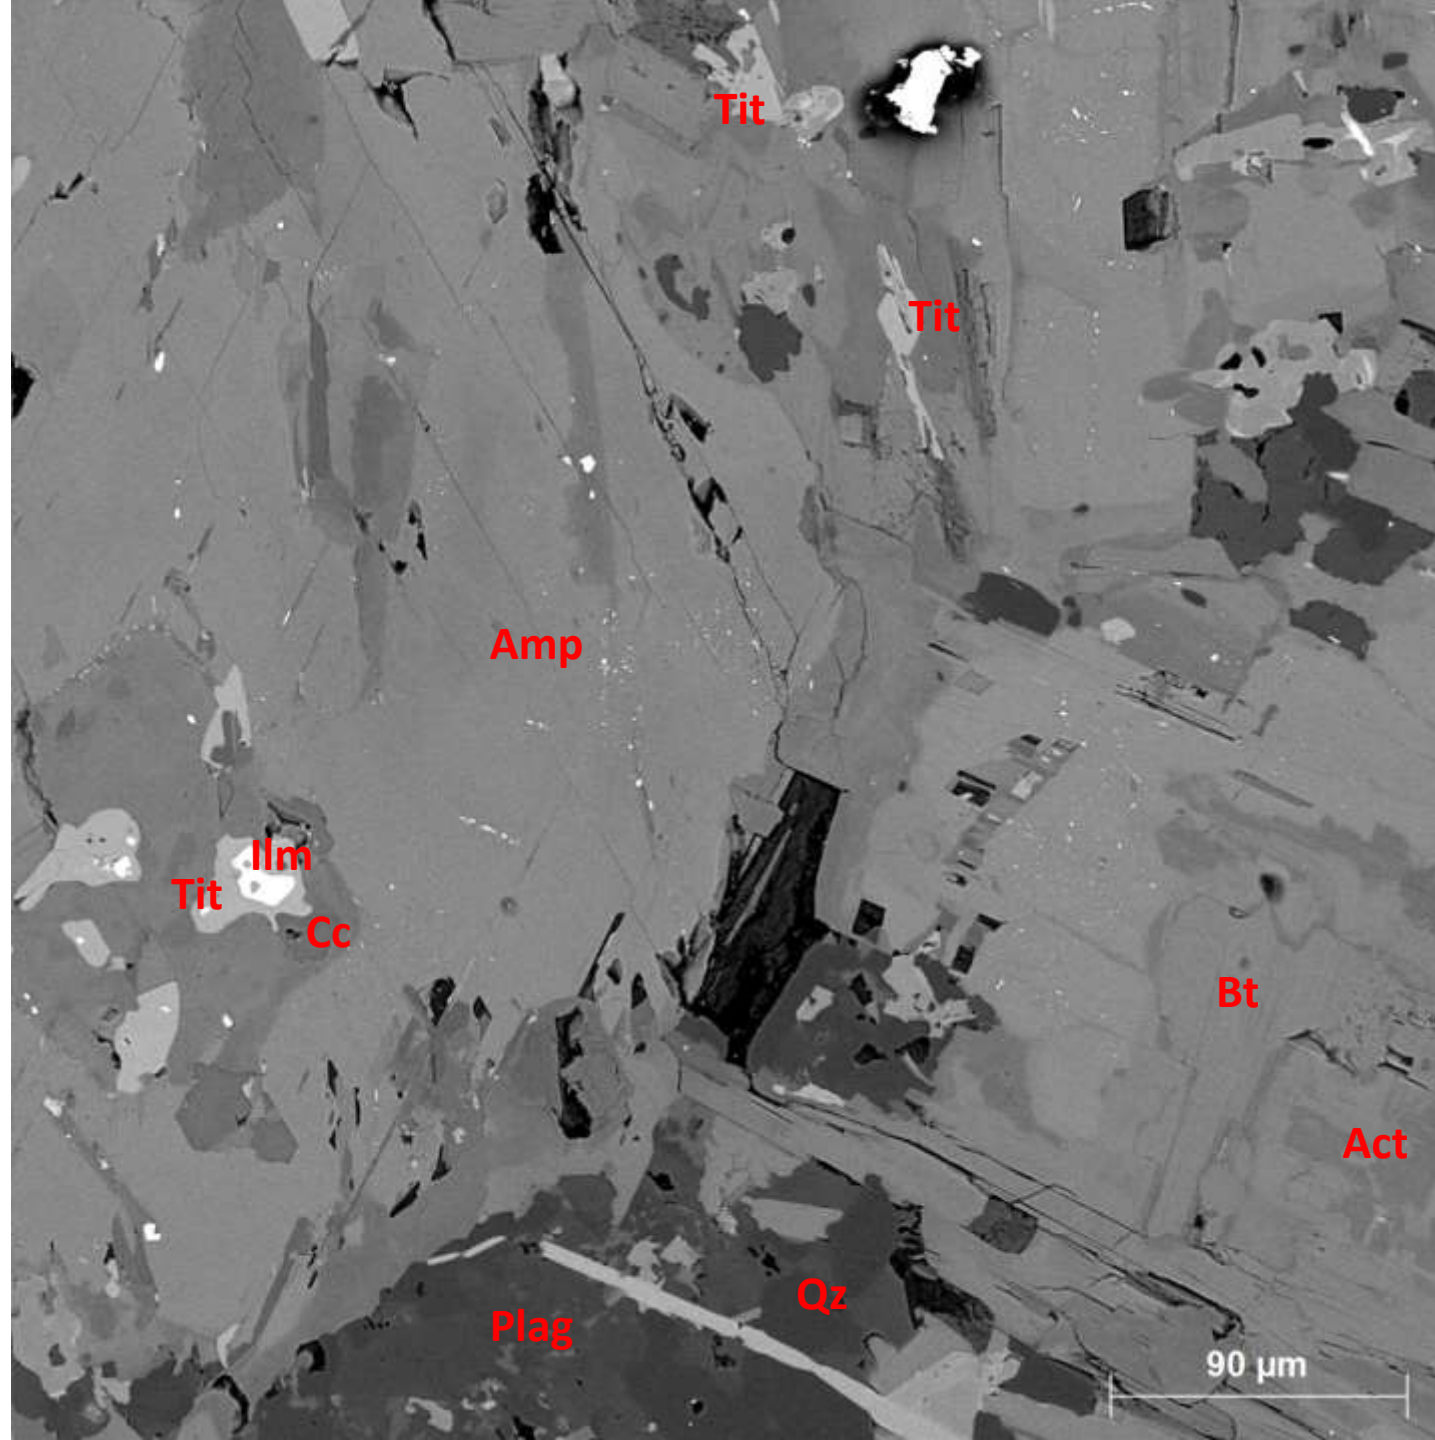



TR04

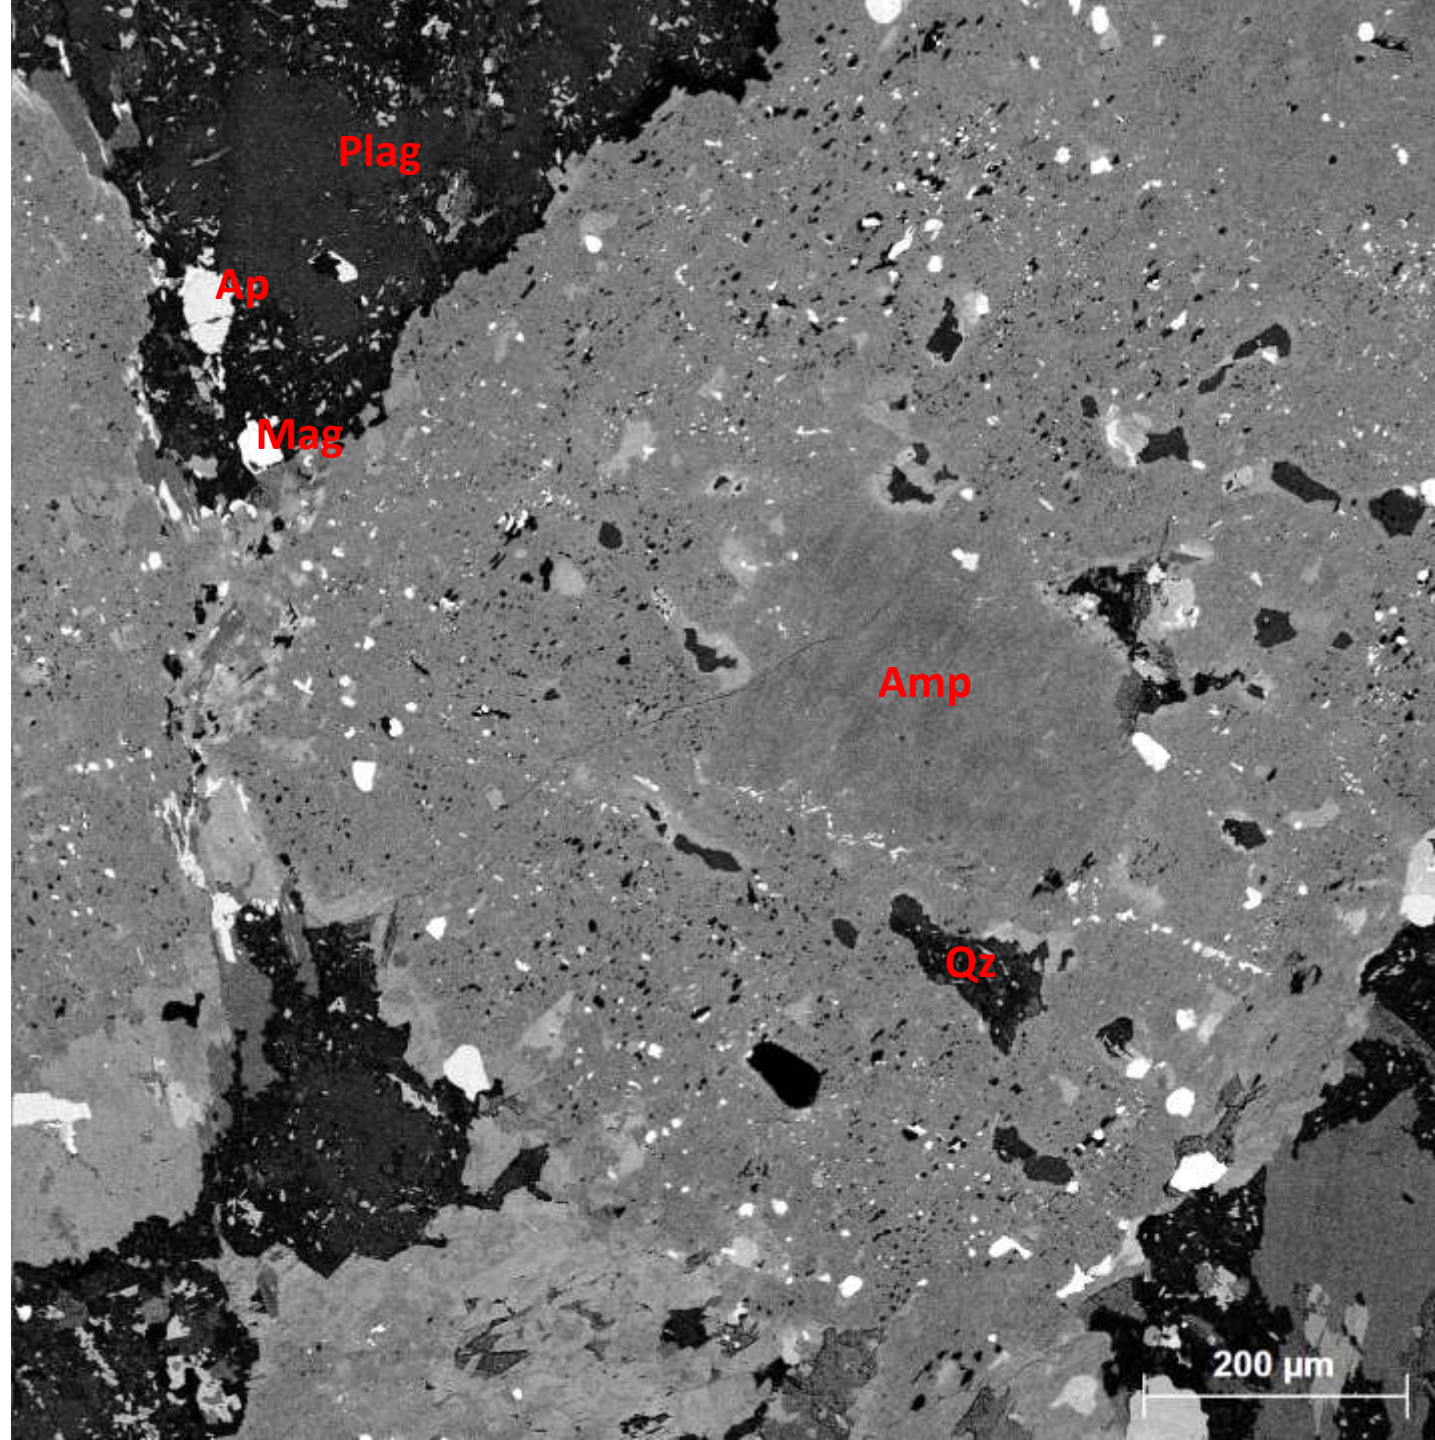

TR04

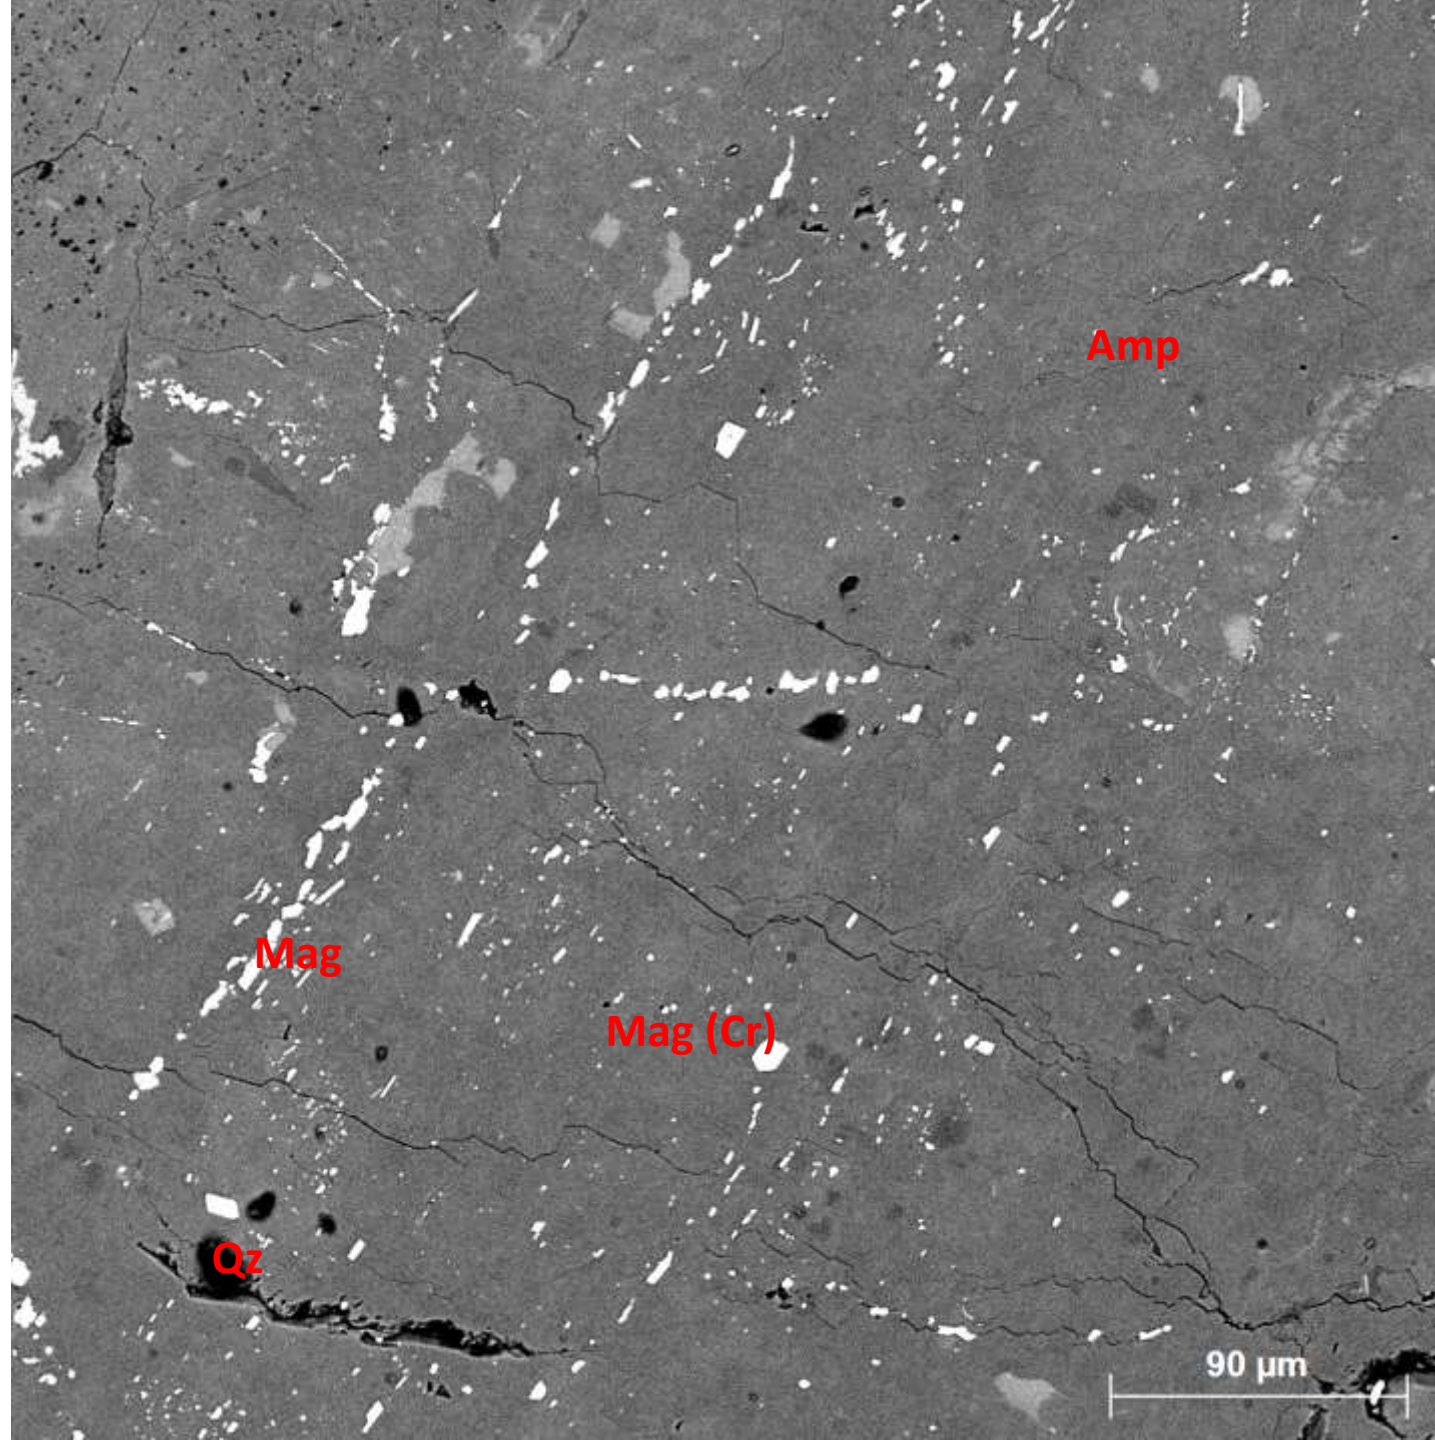



TR05

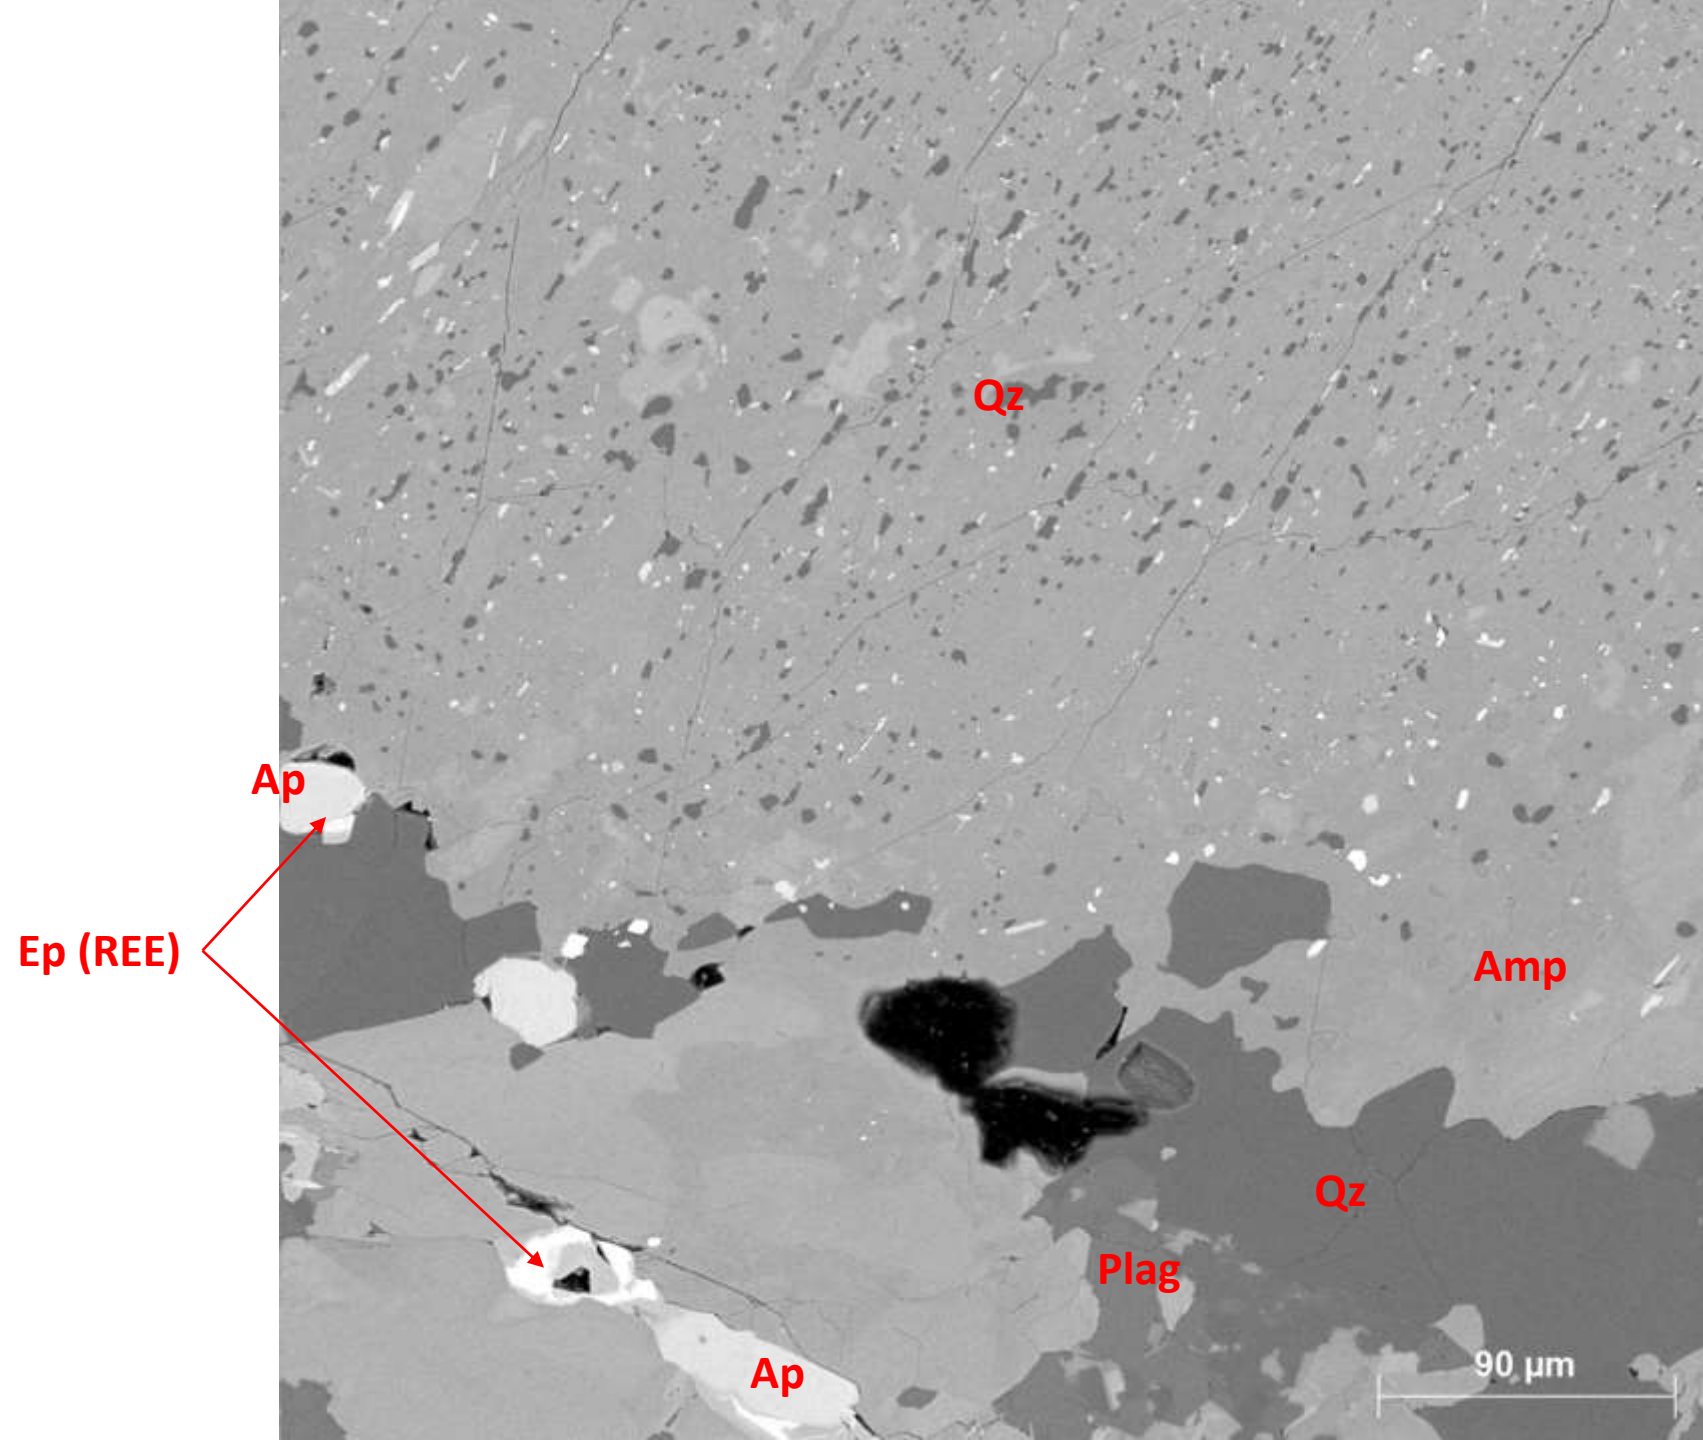

TR05

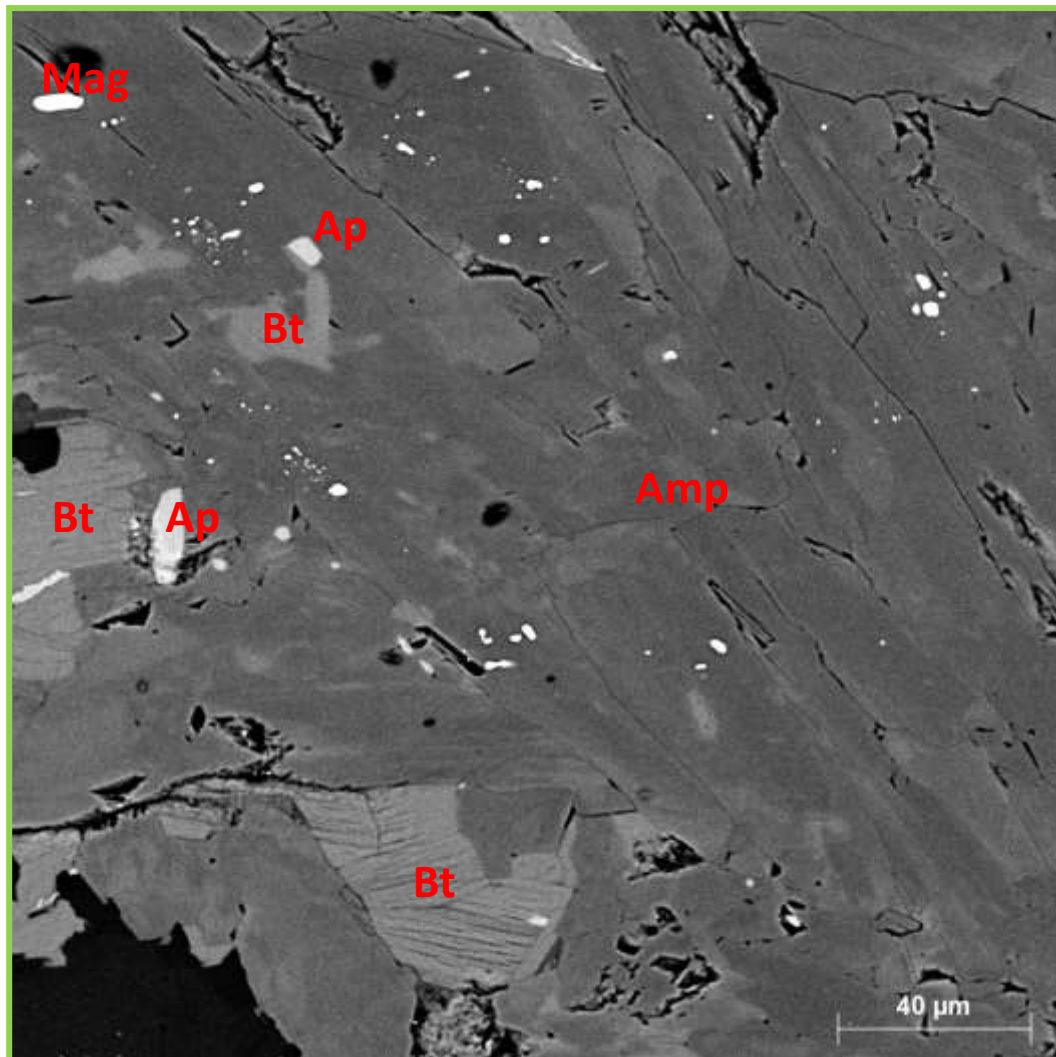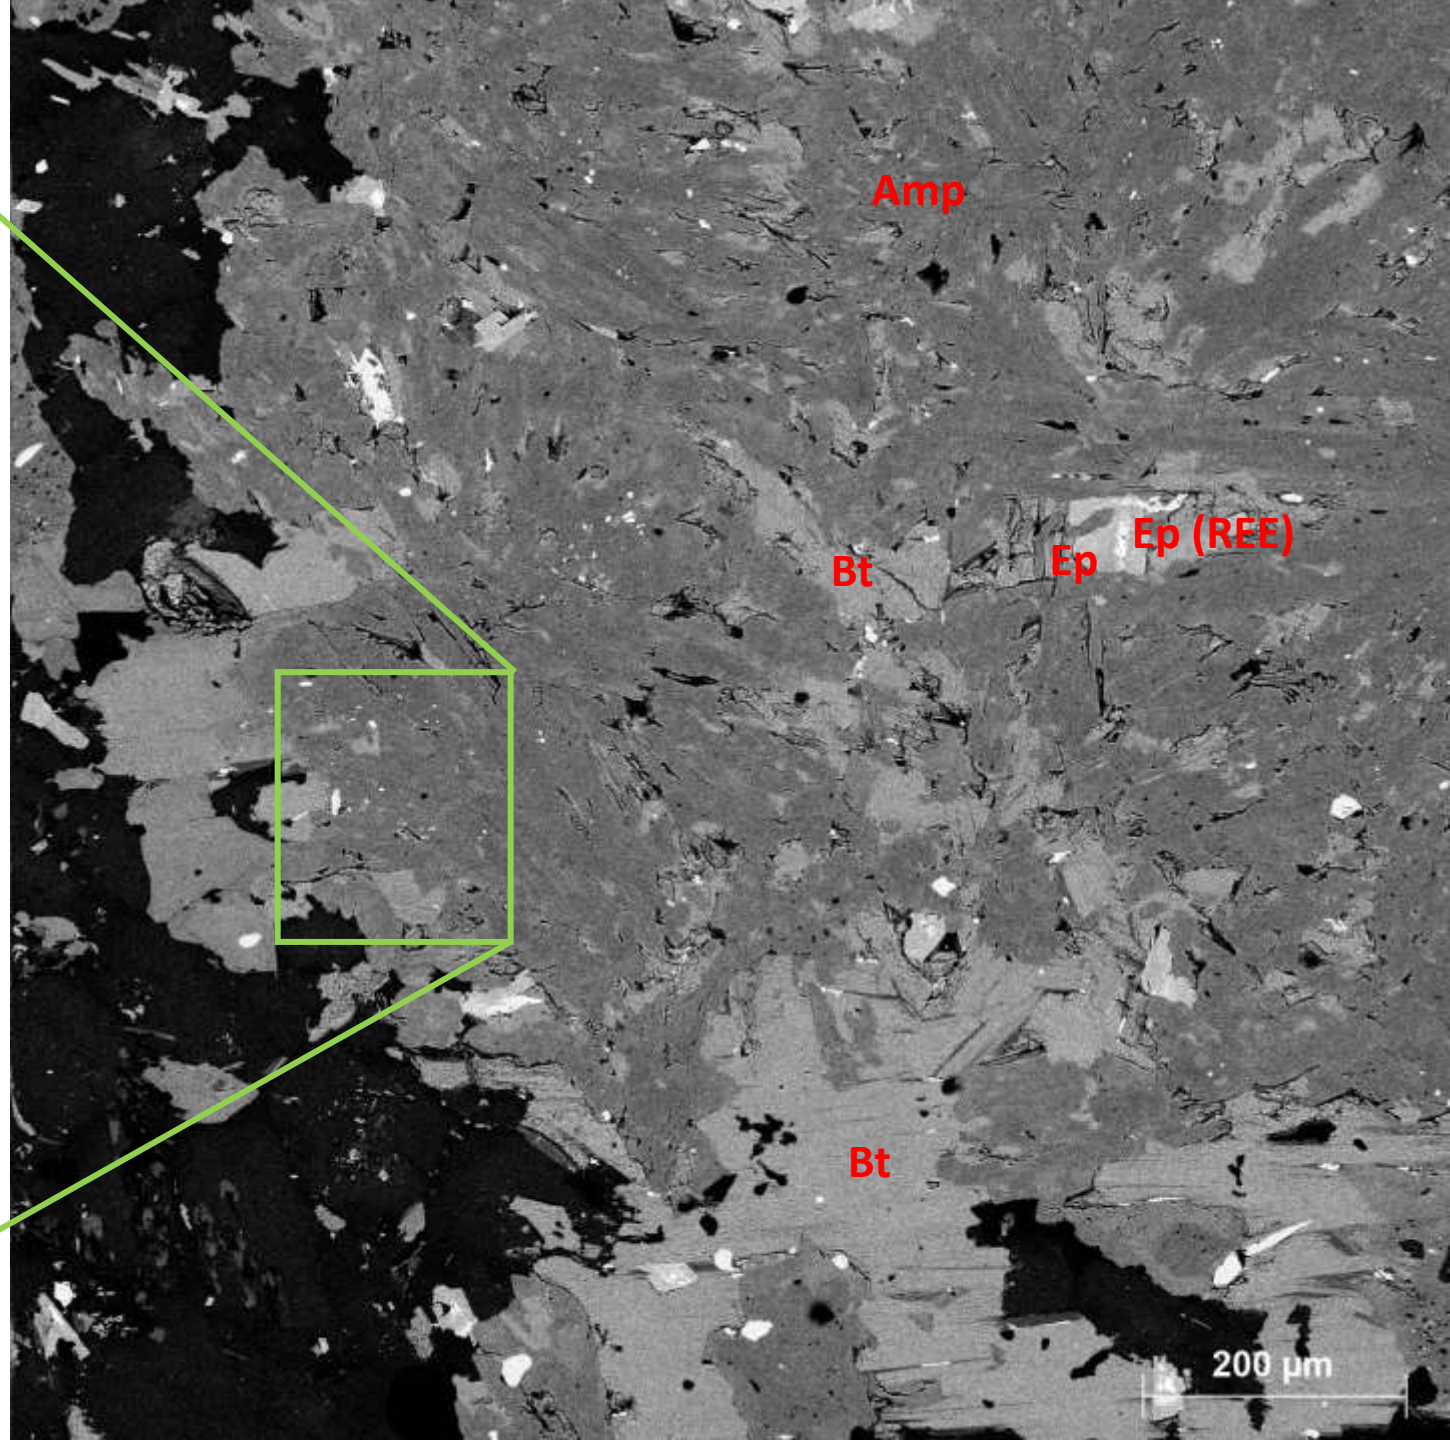



TR05

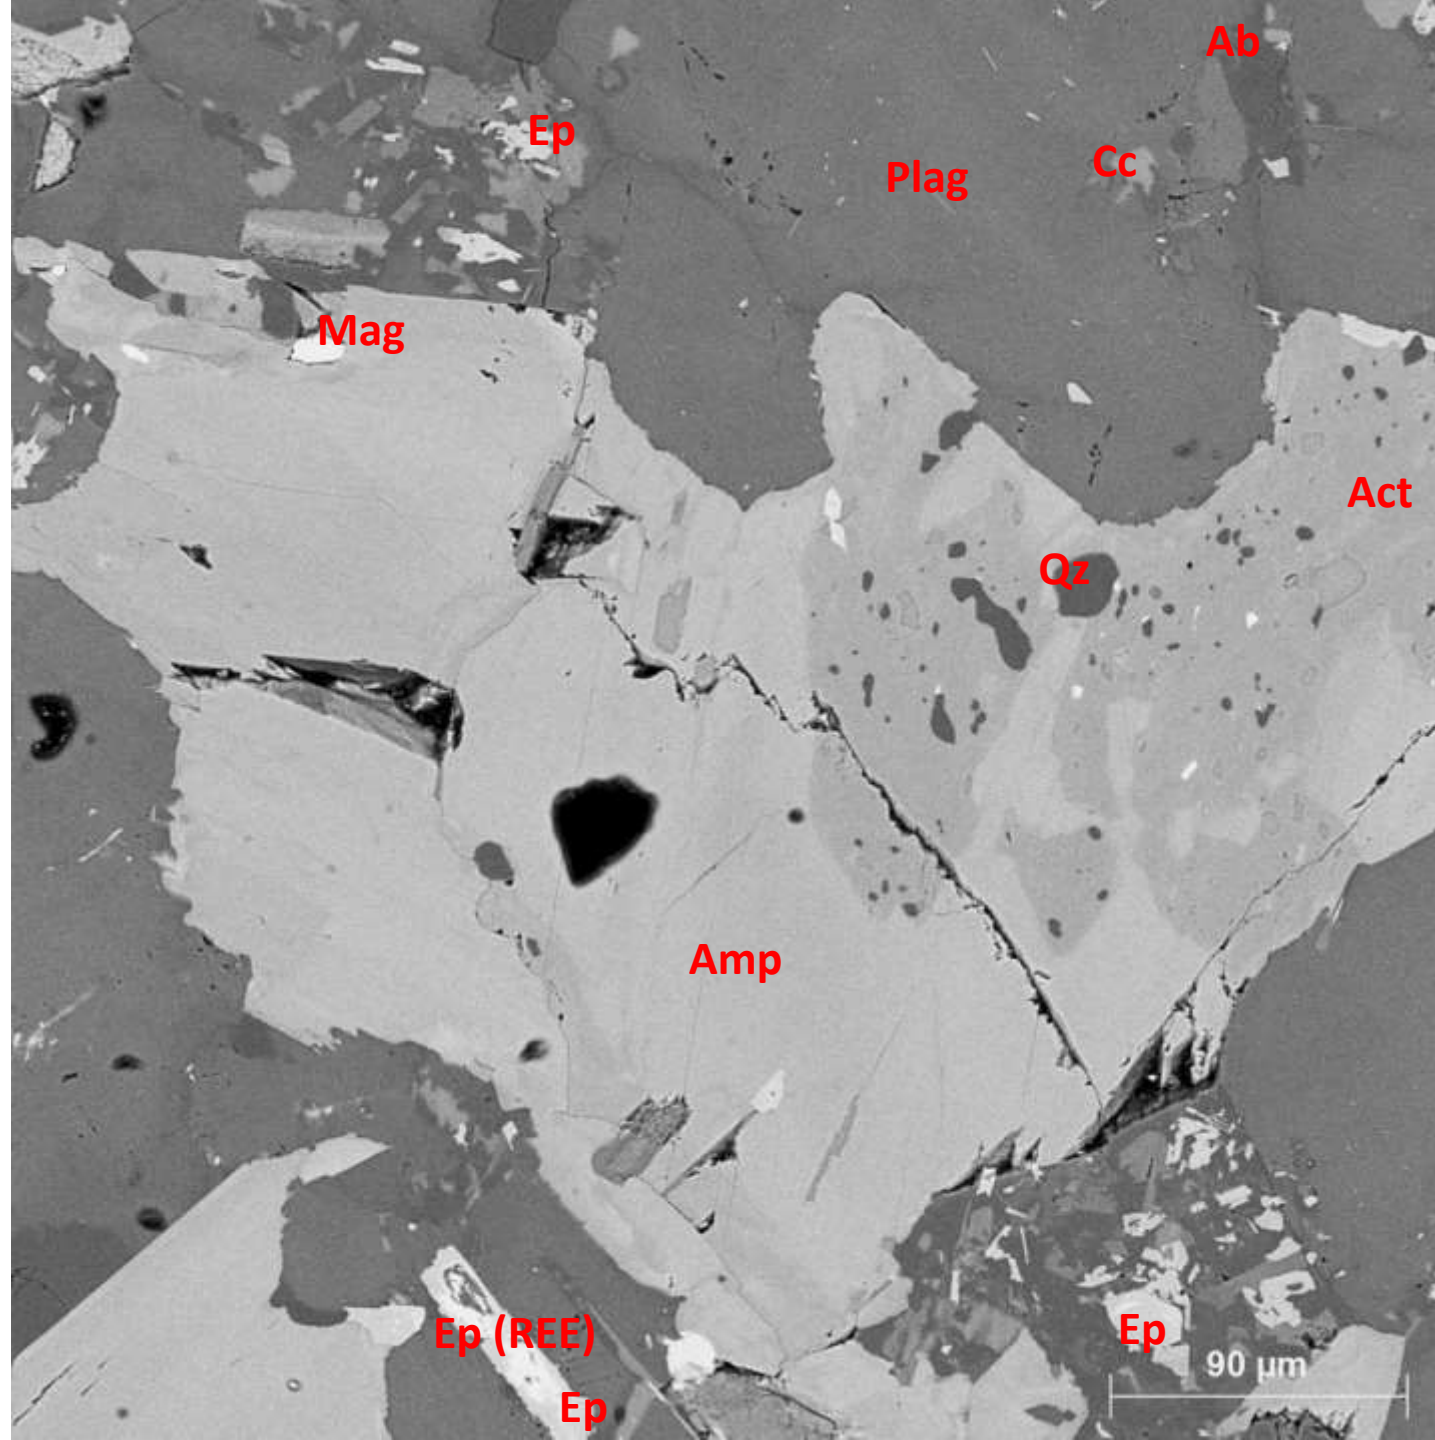

TR06

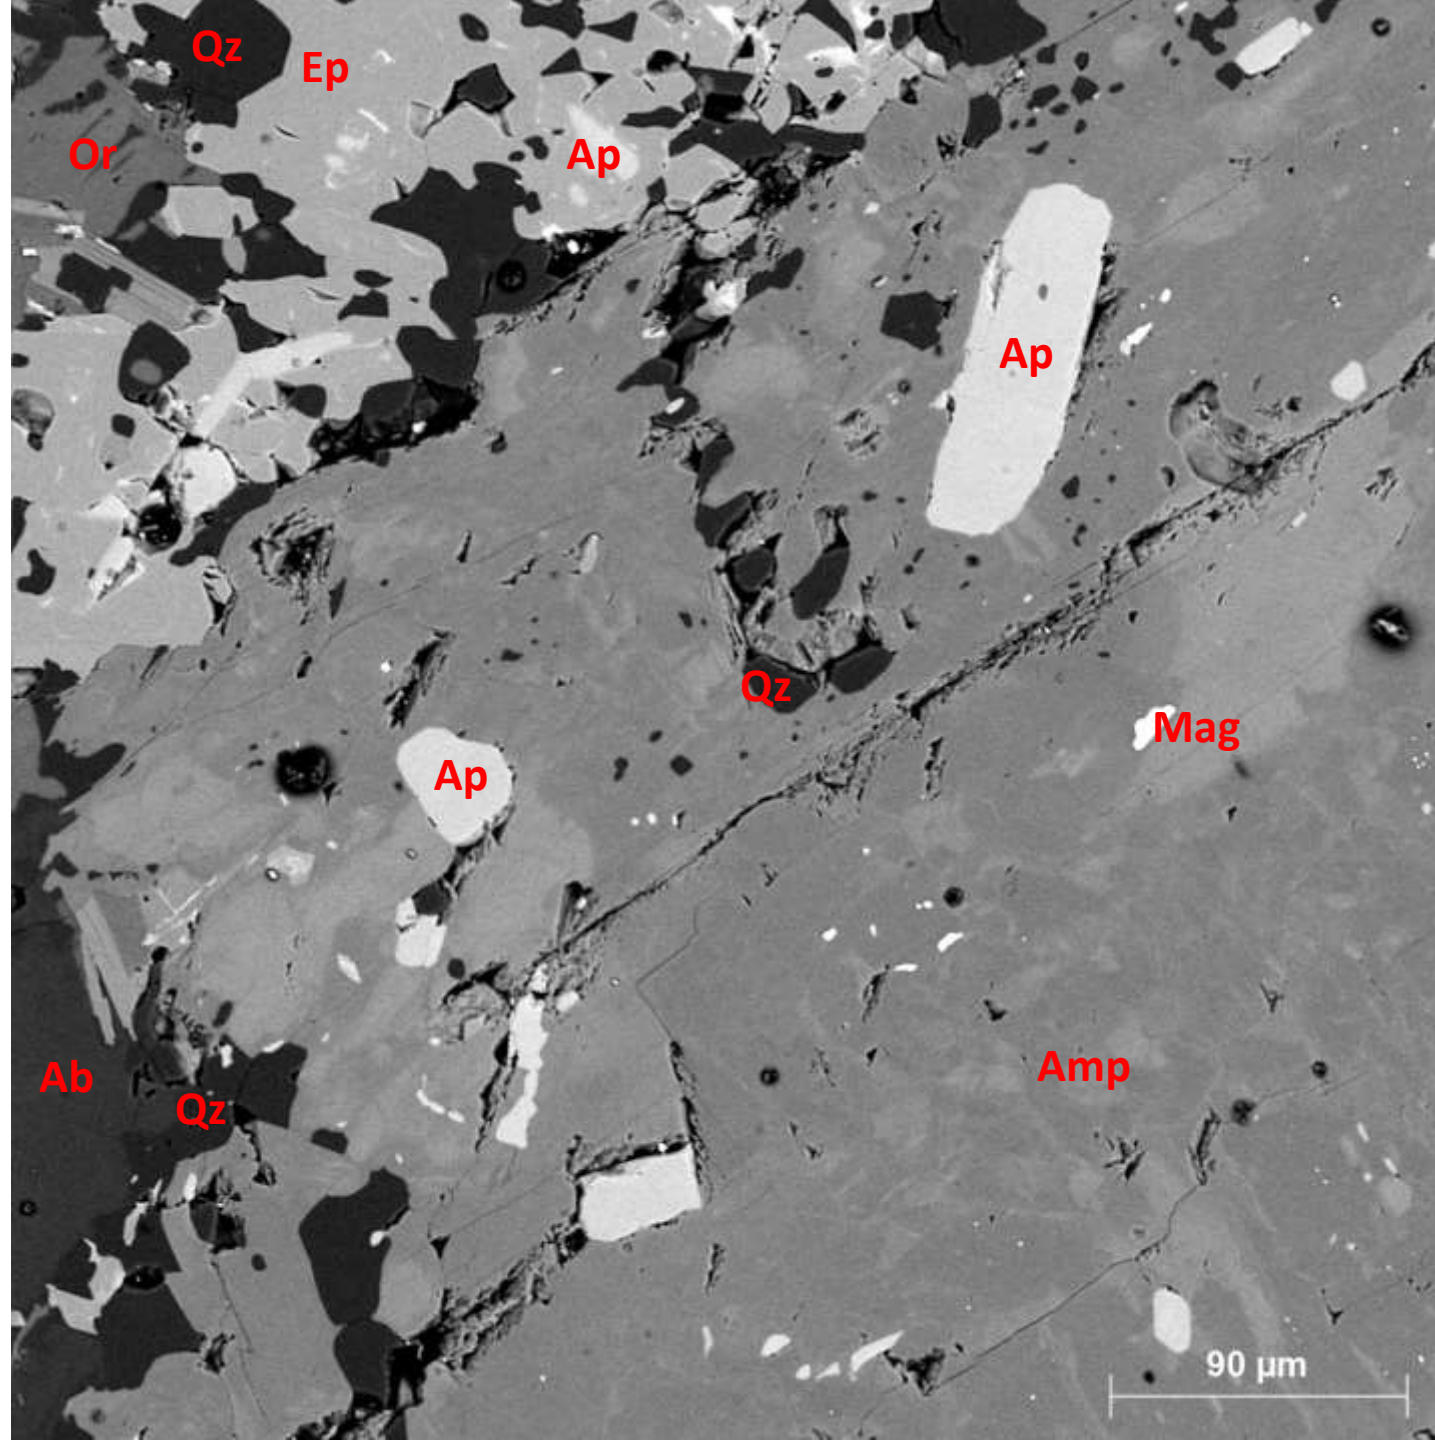



TR06

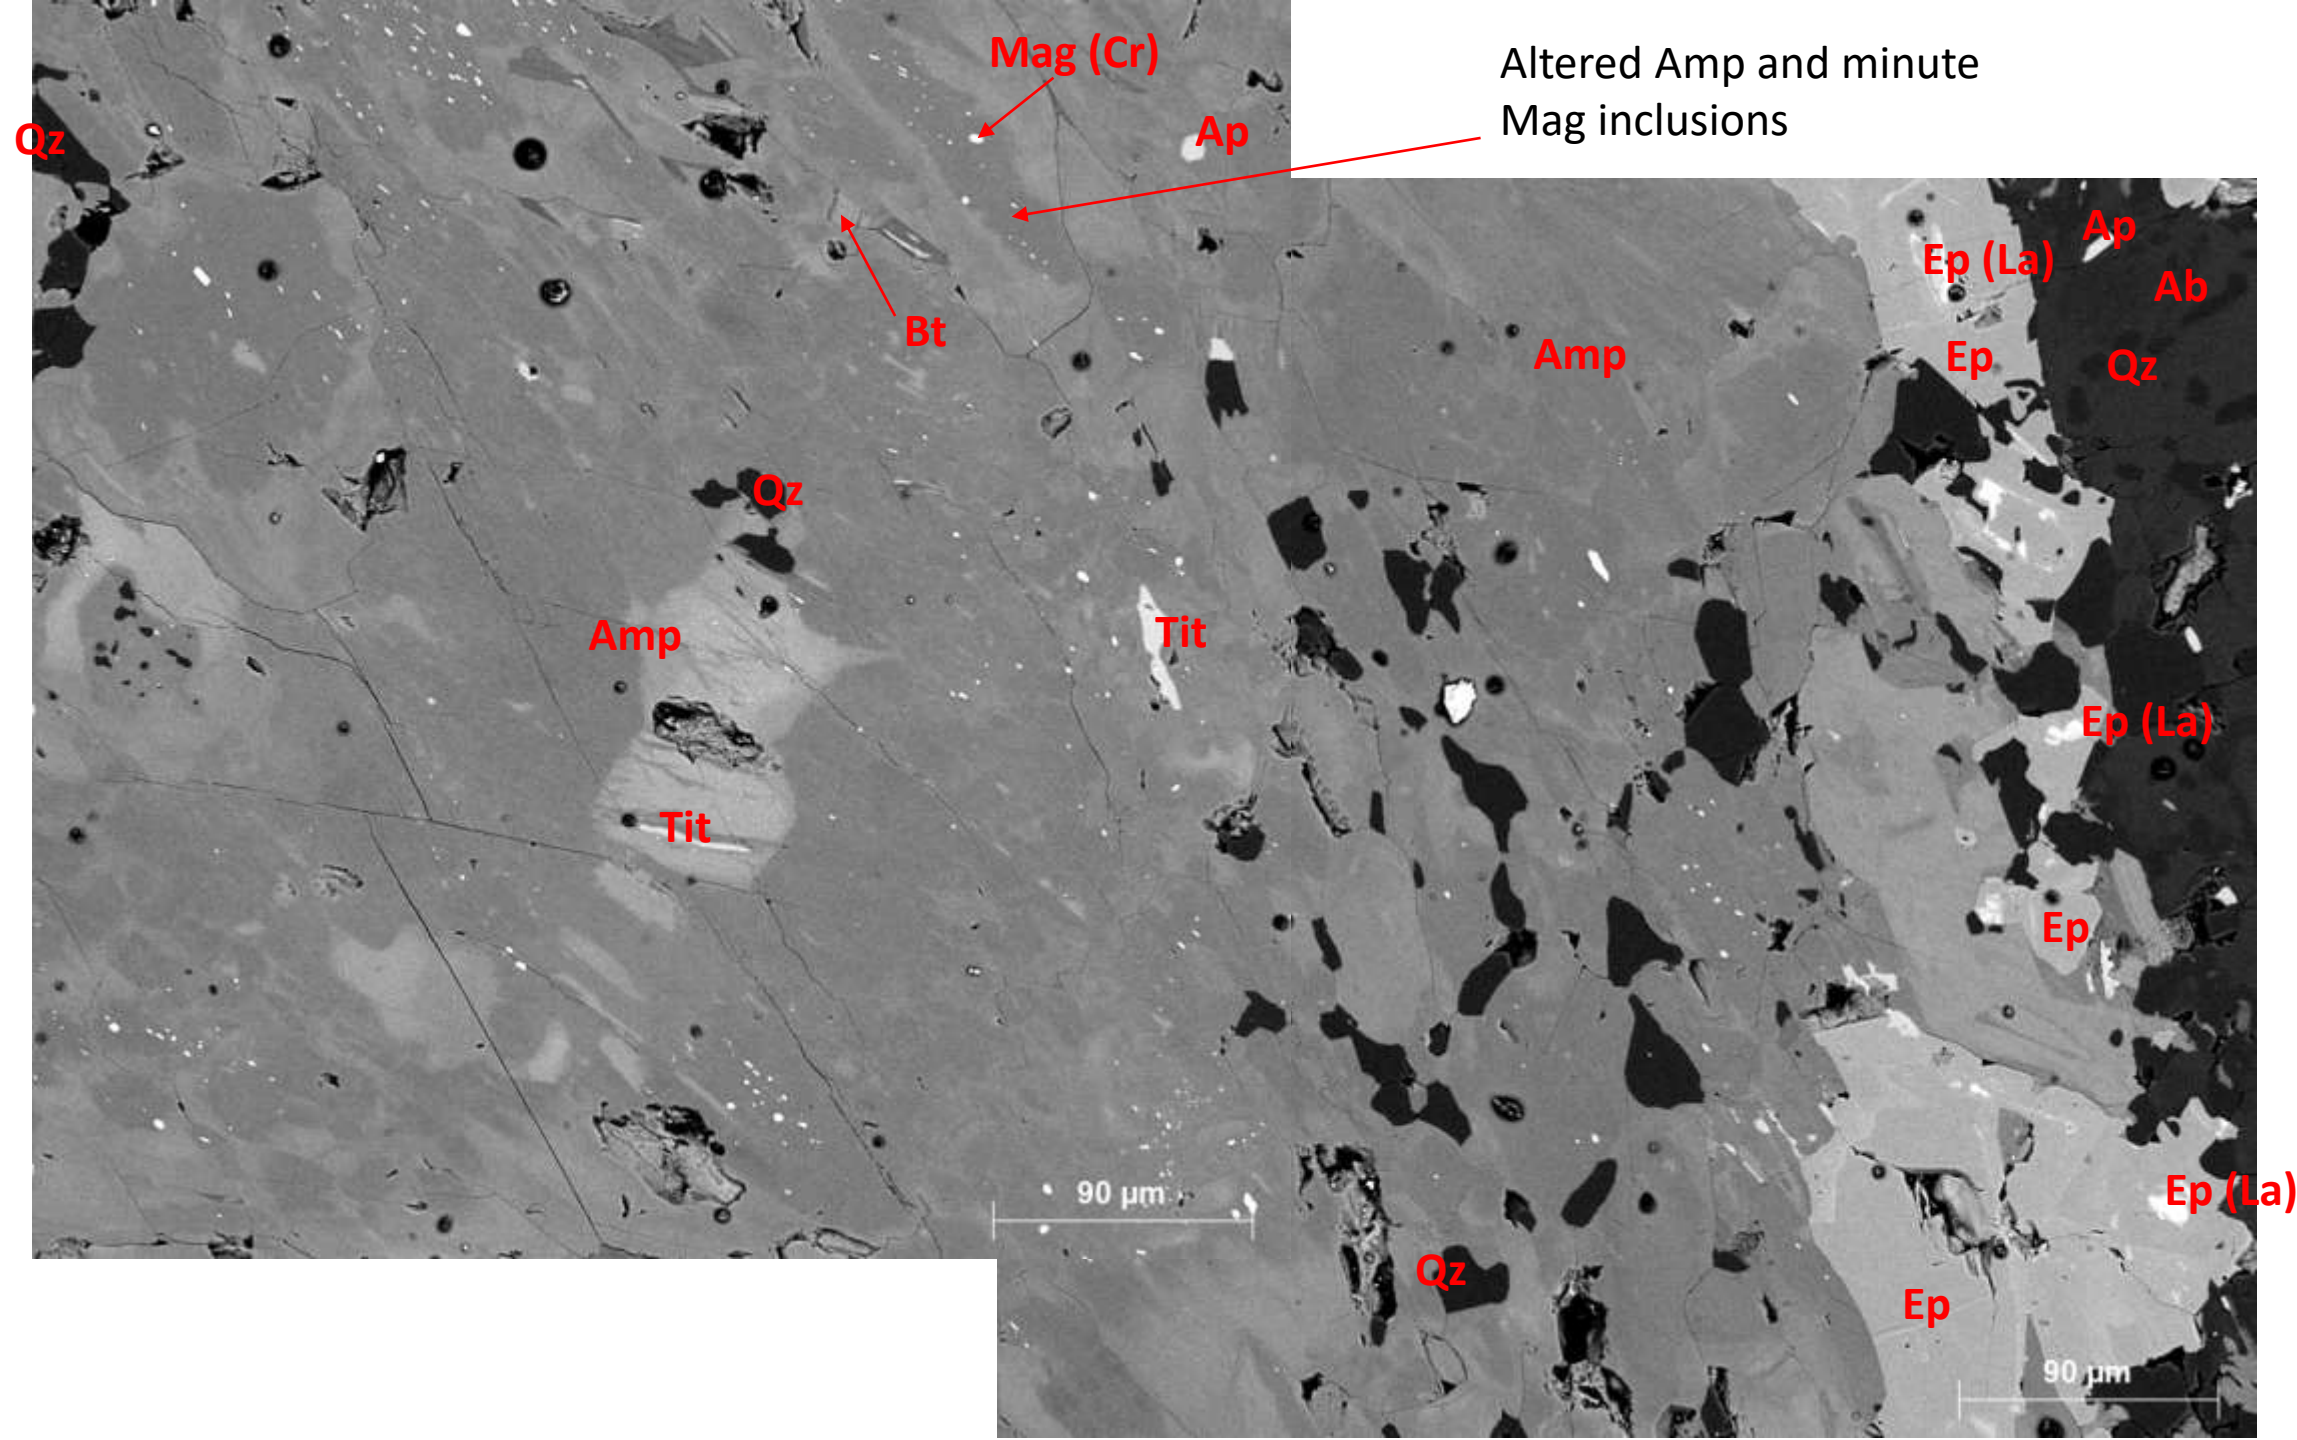

TR06

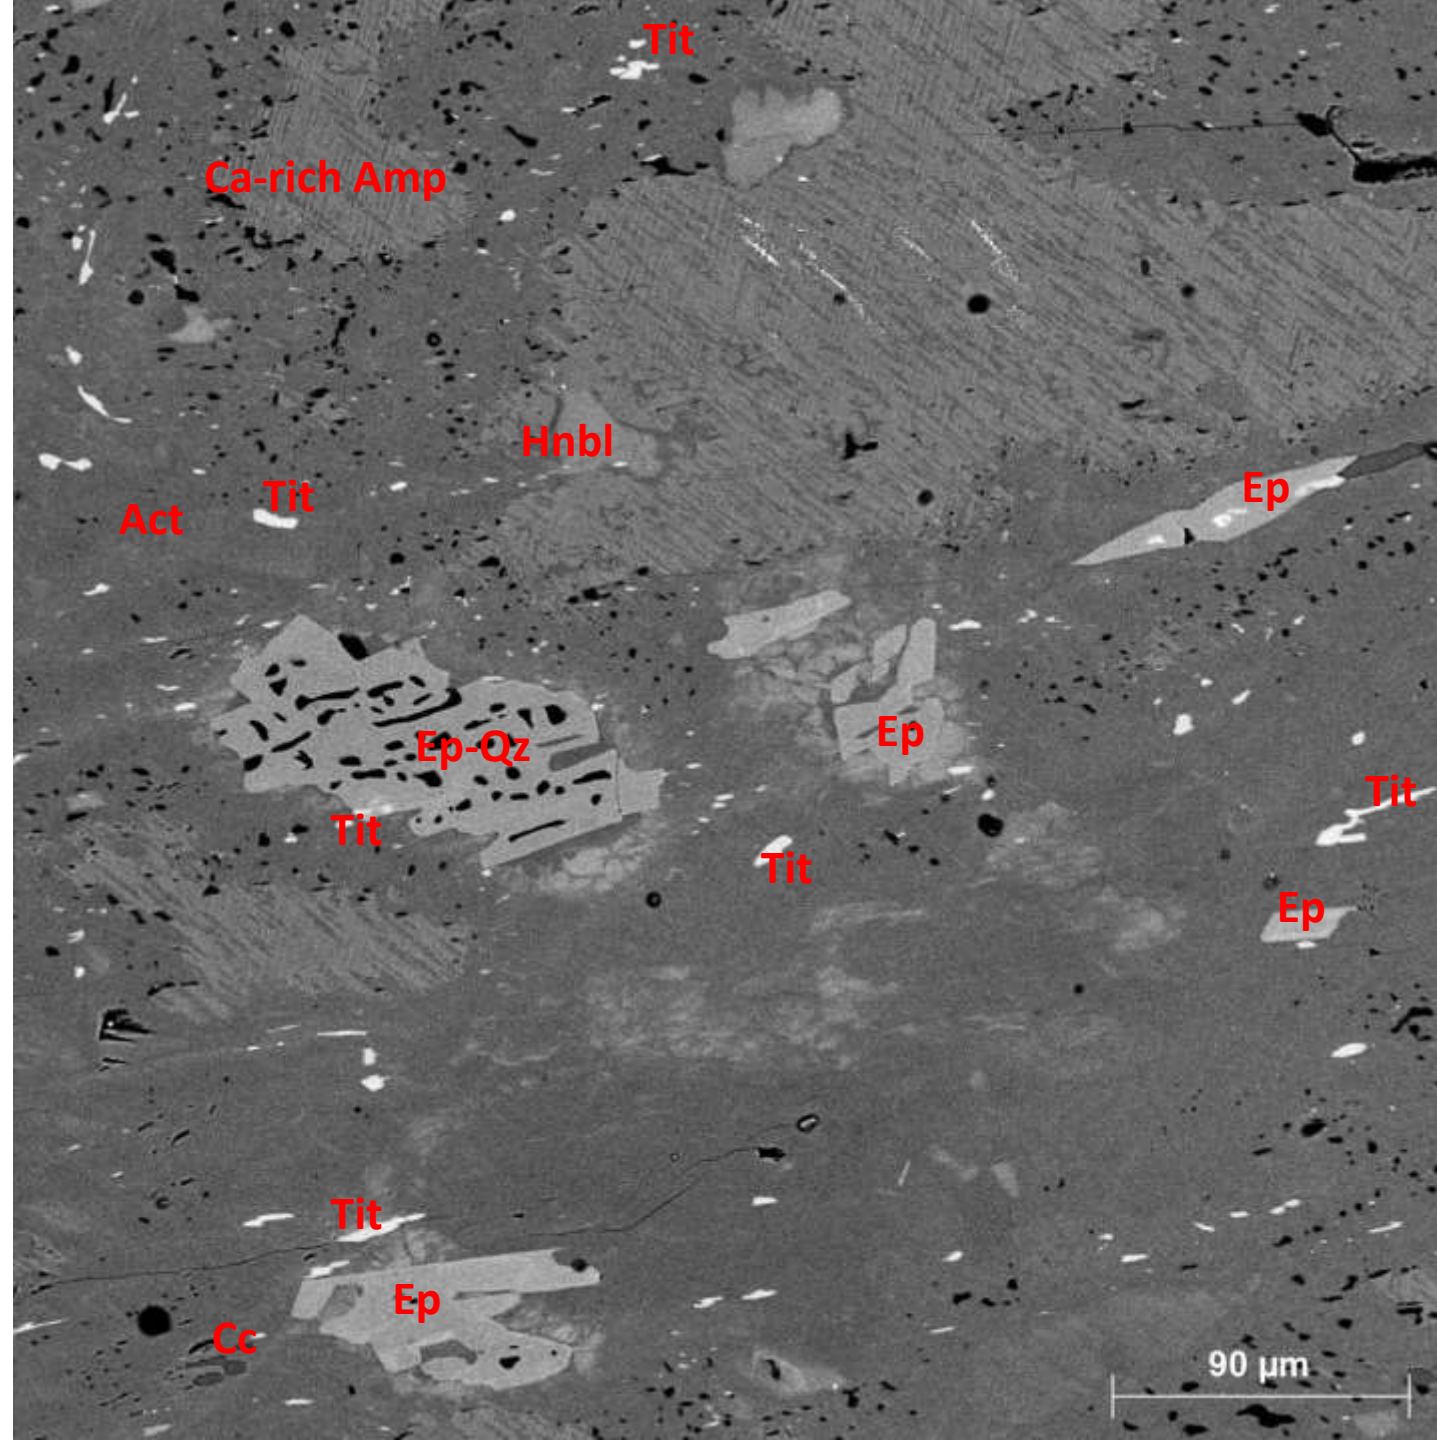



TR06

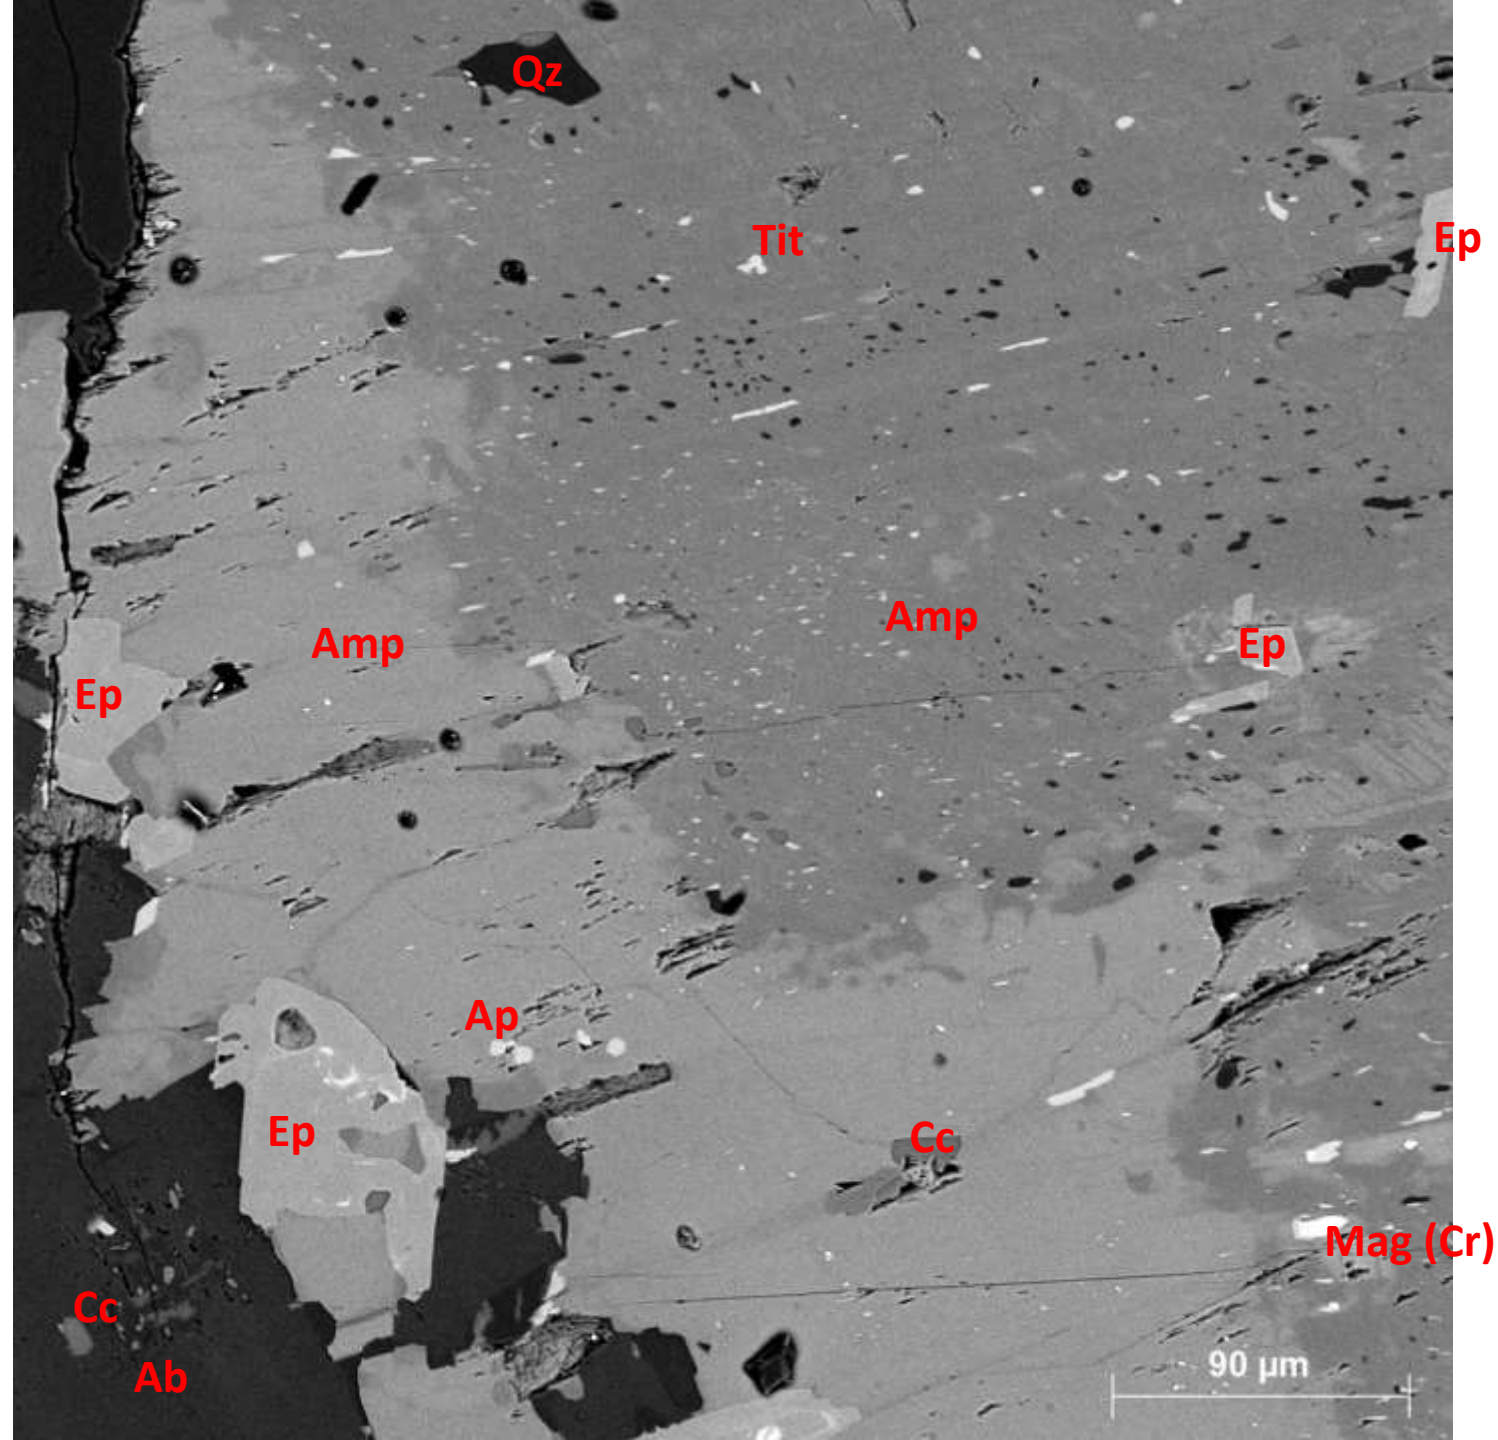

TR06

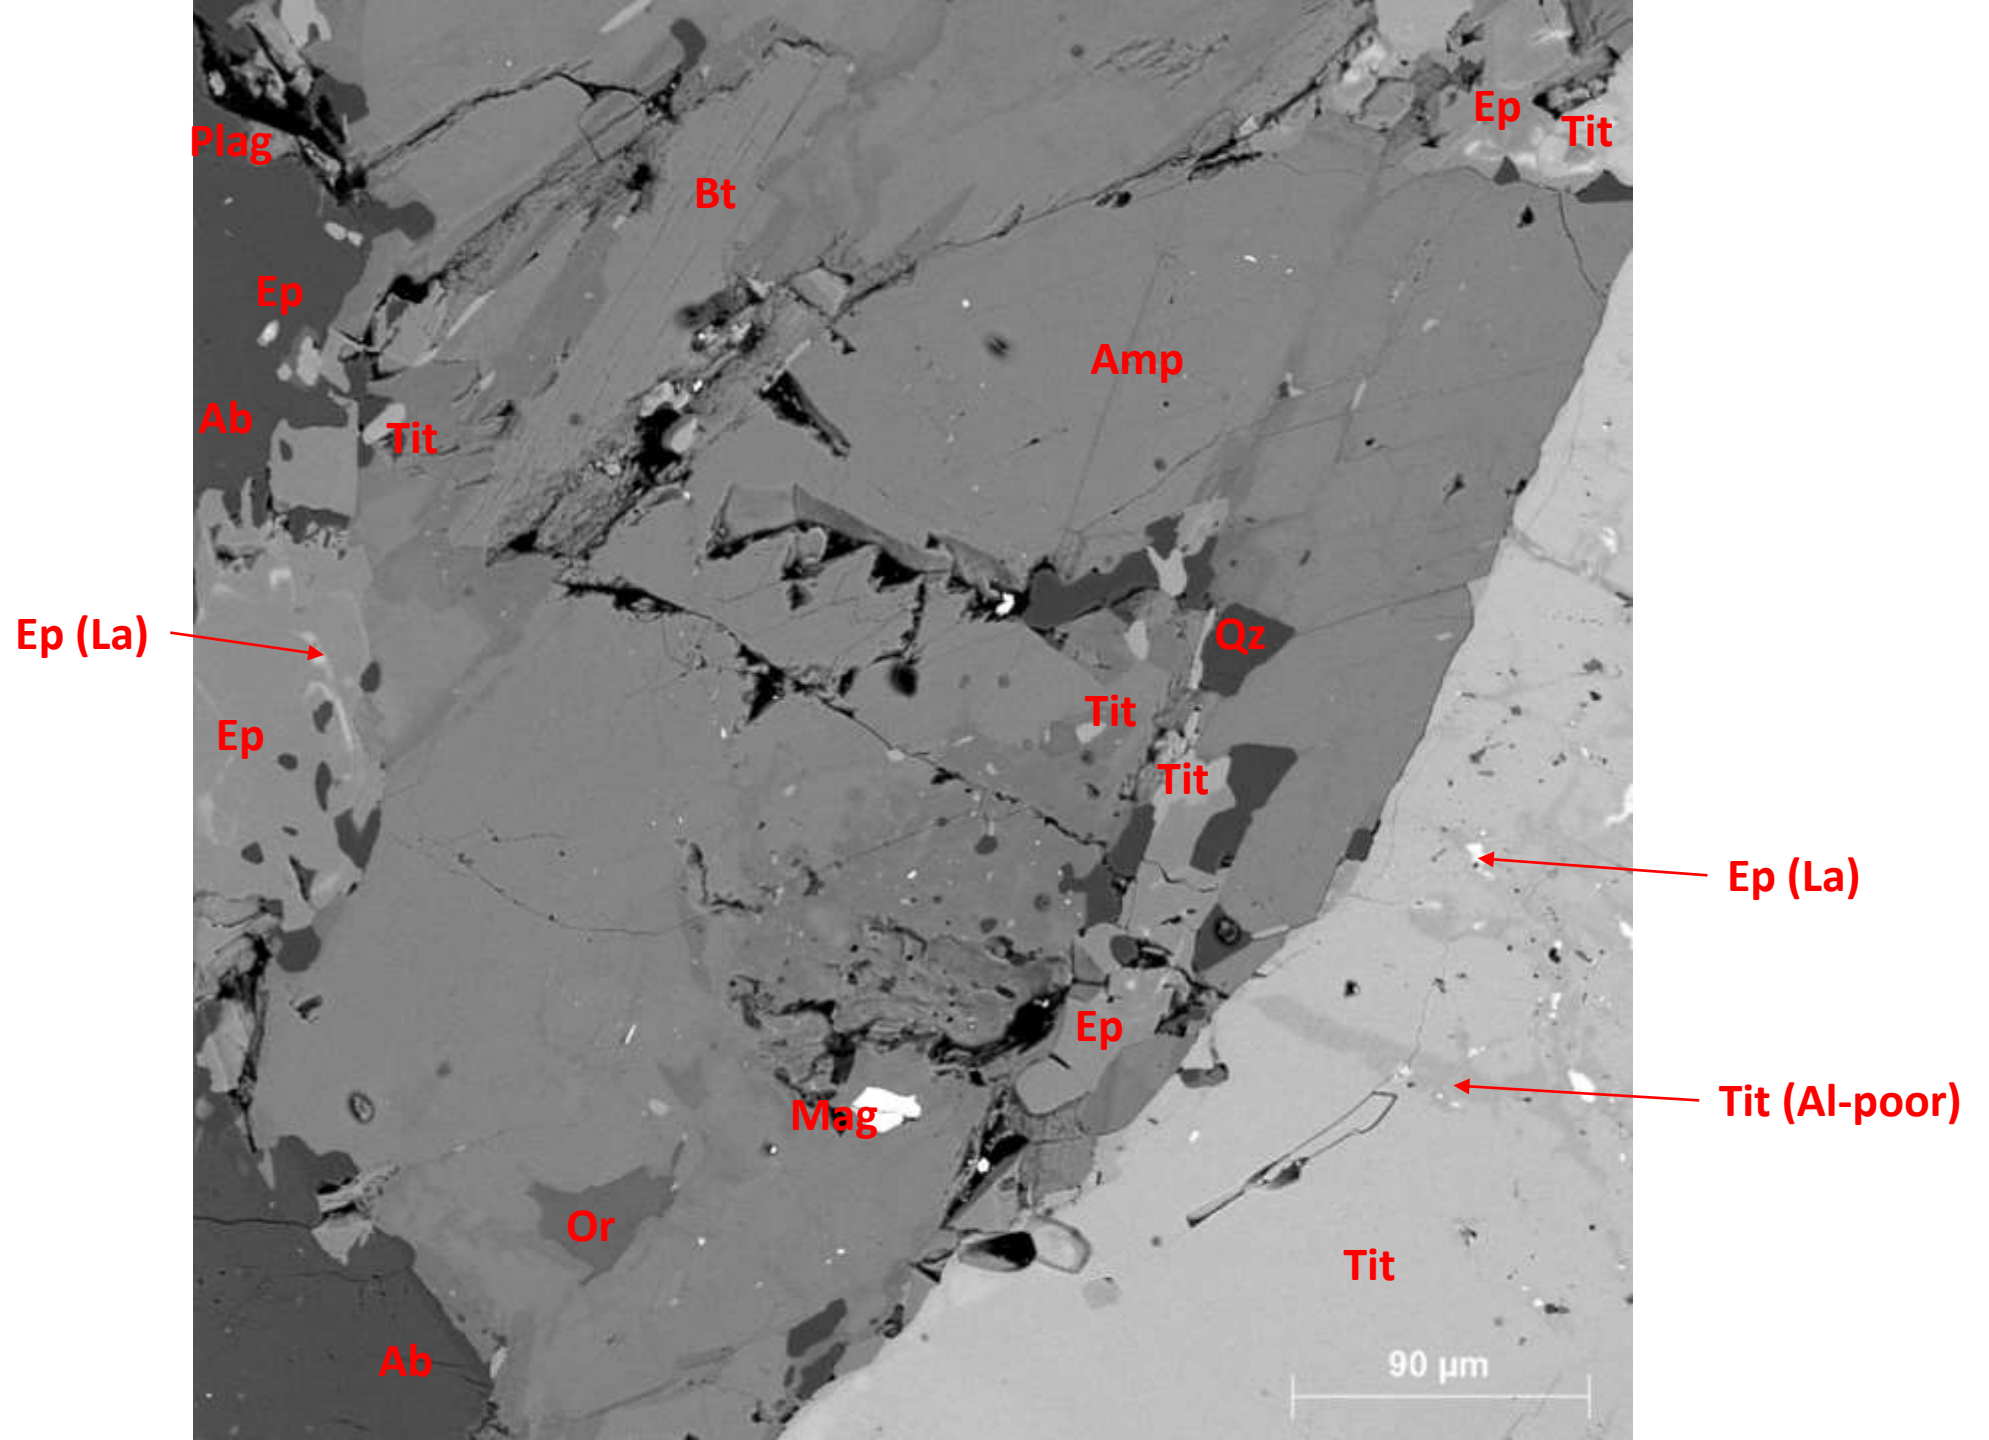



TR10

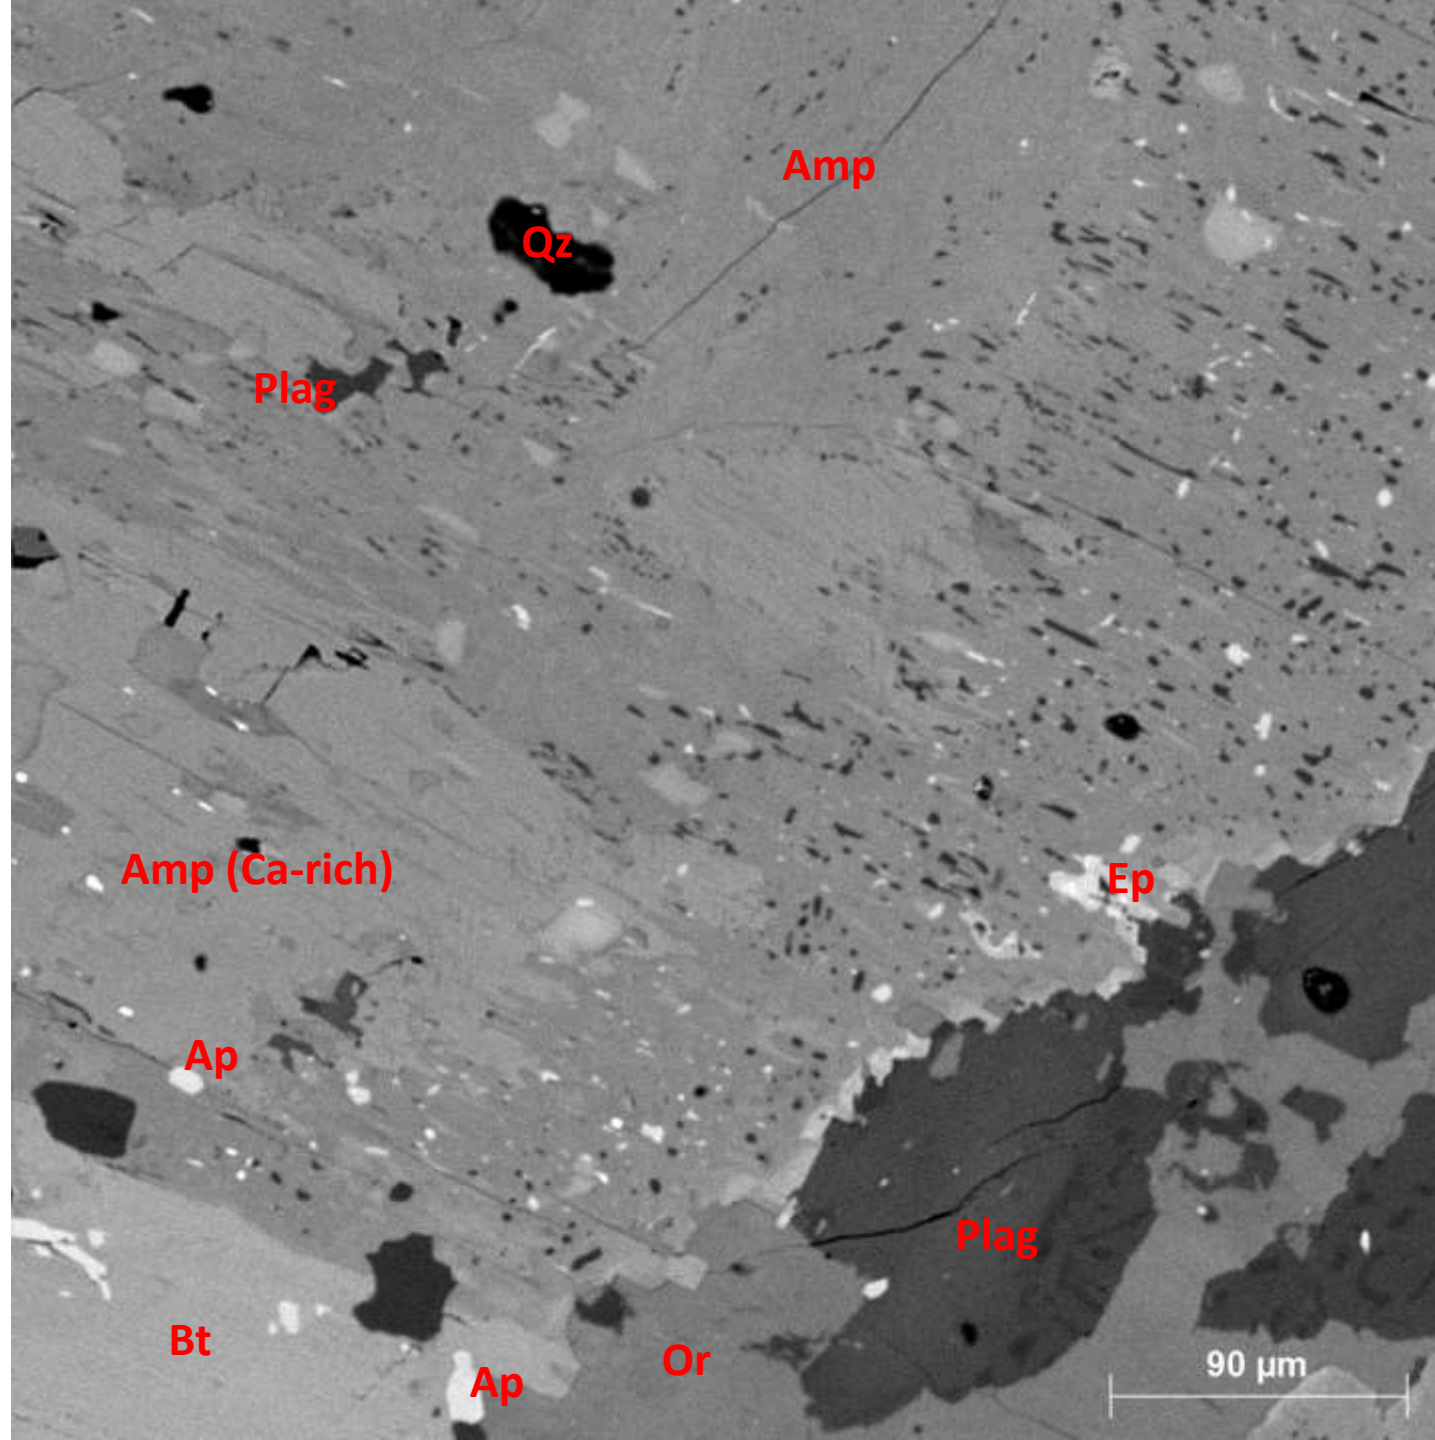

TR10

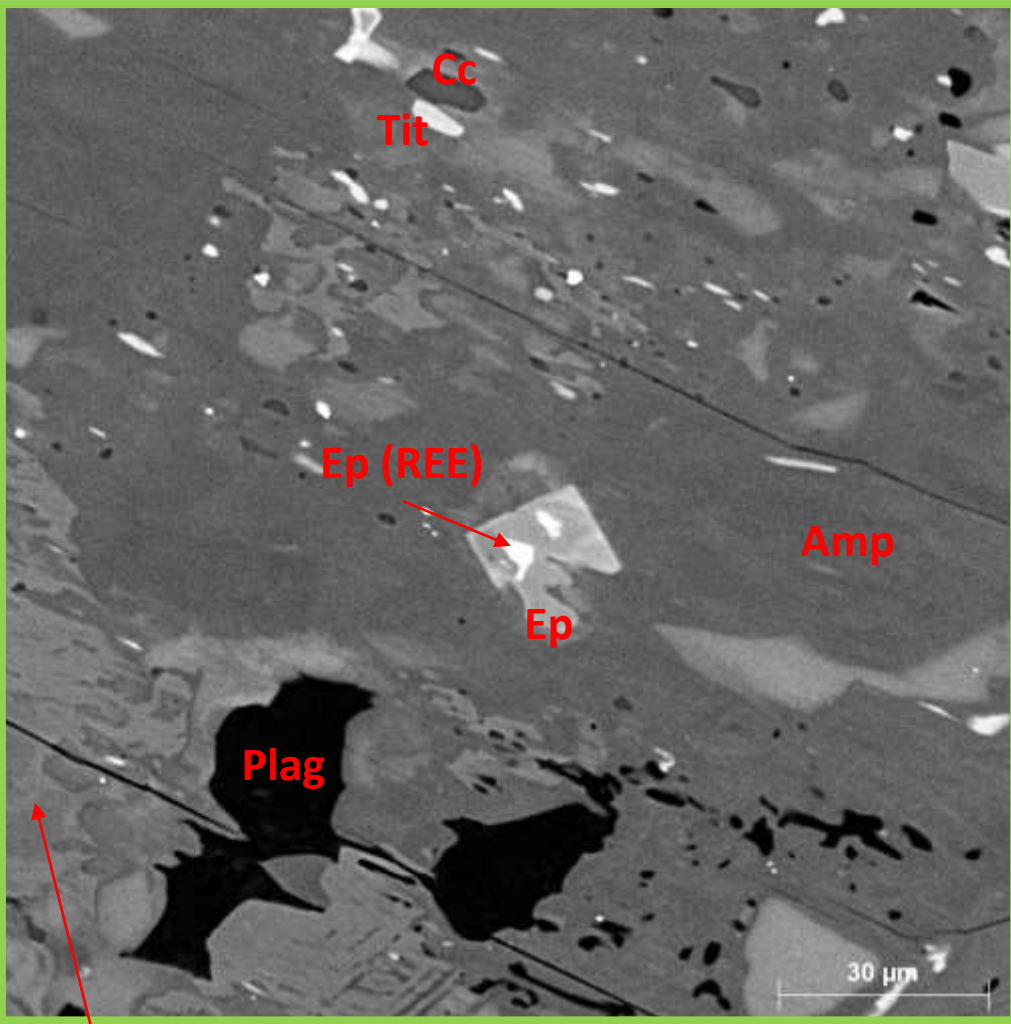

Amp (Ca-rich)

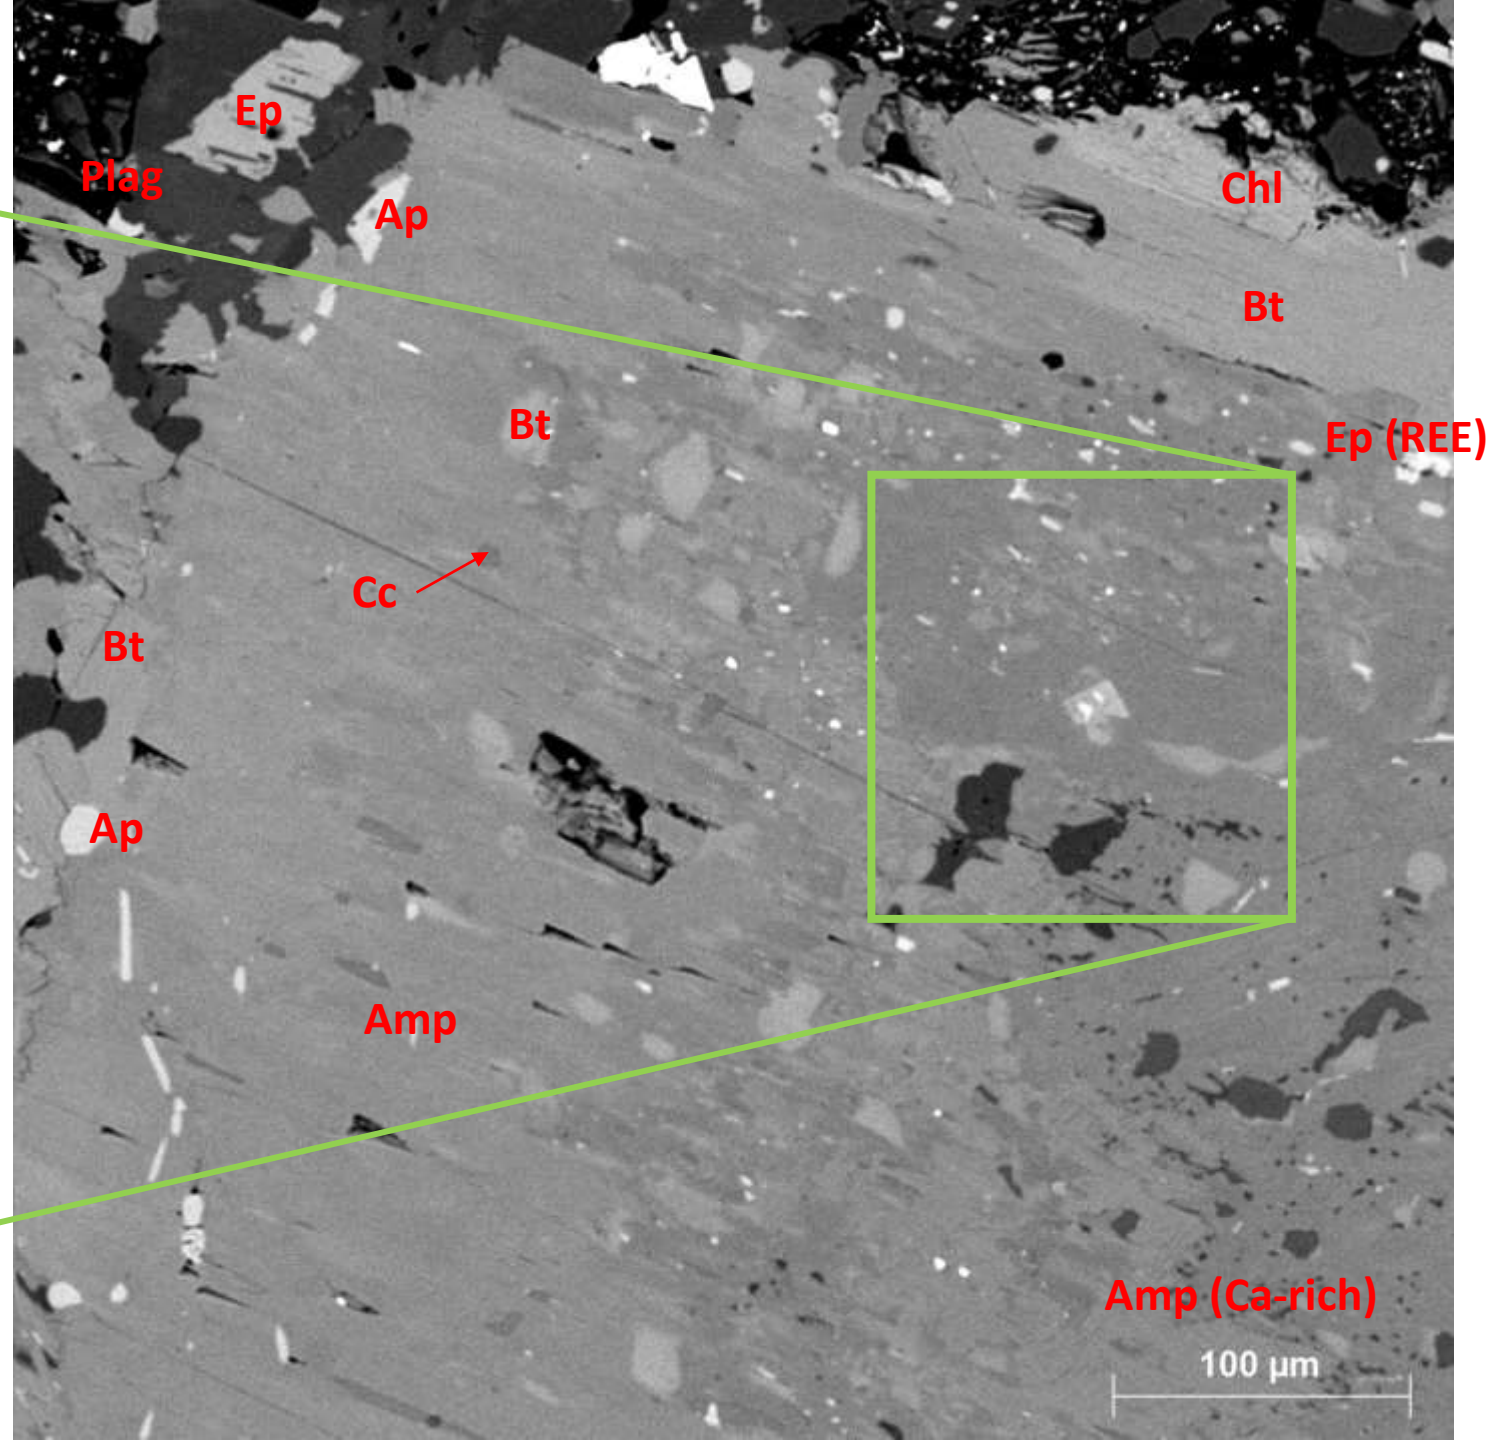



TR10

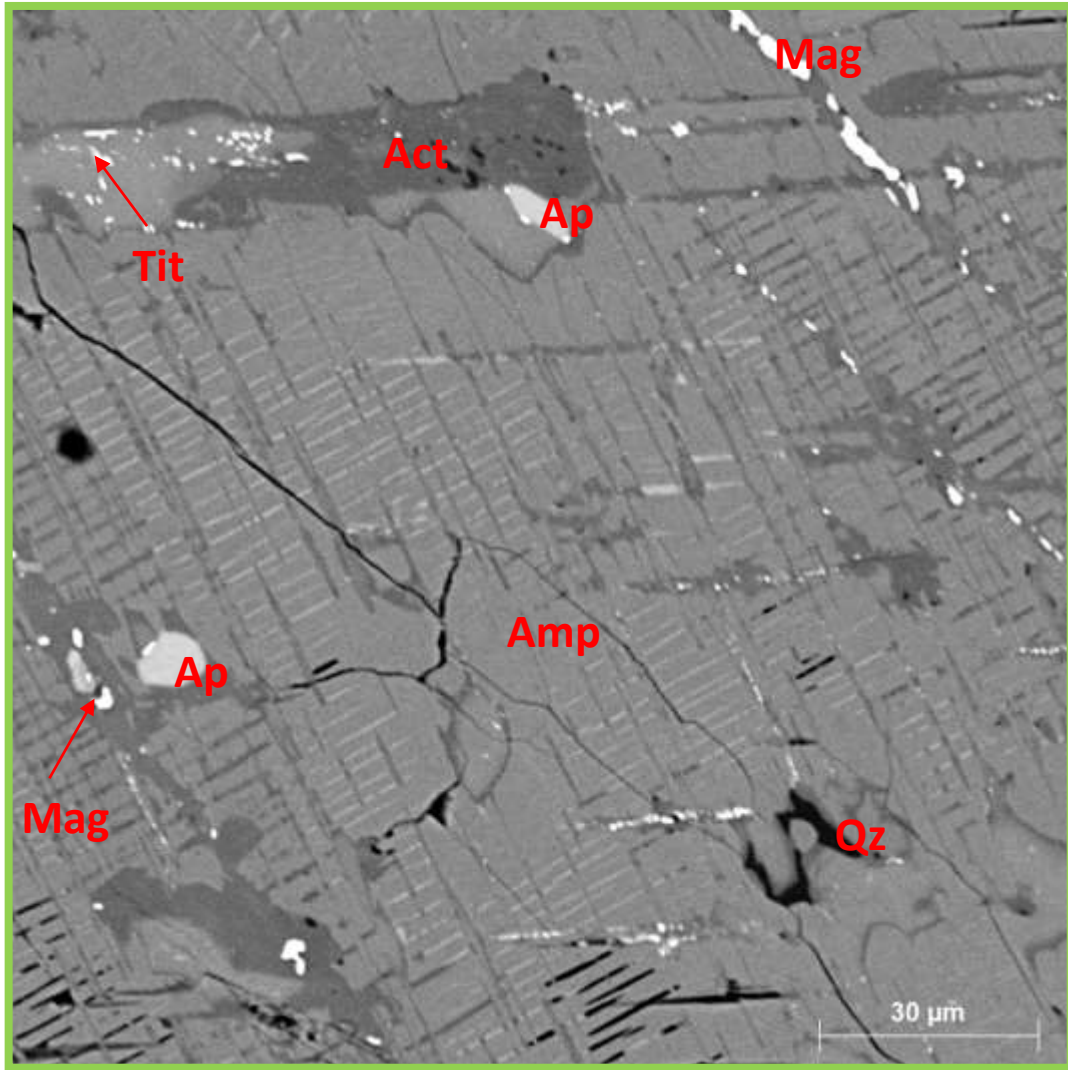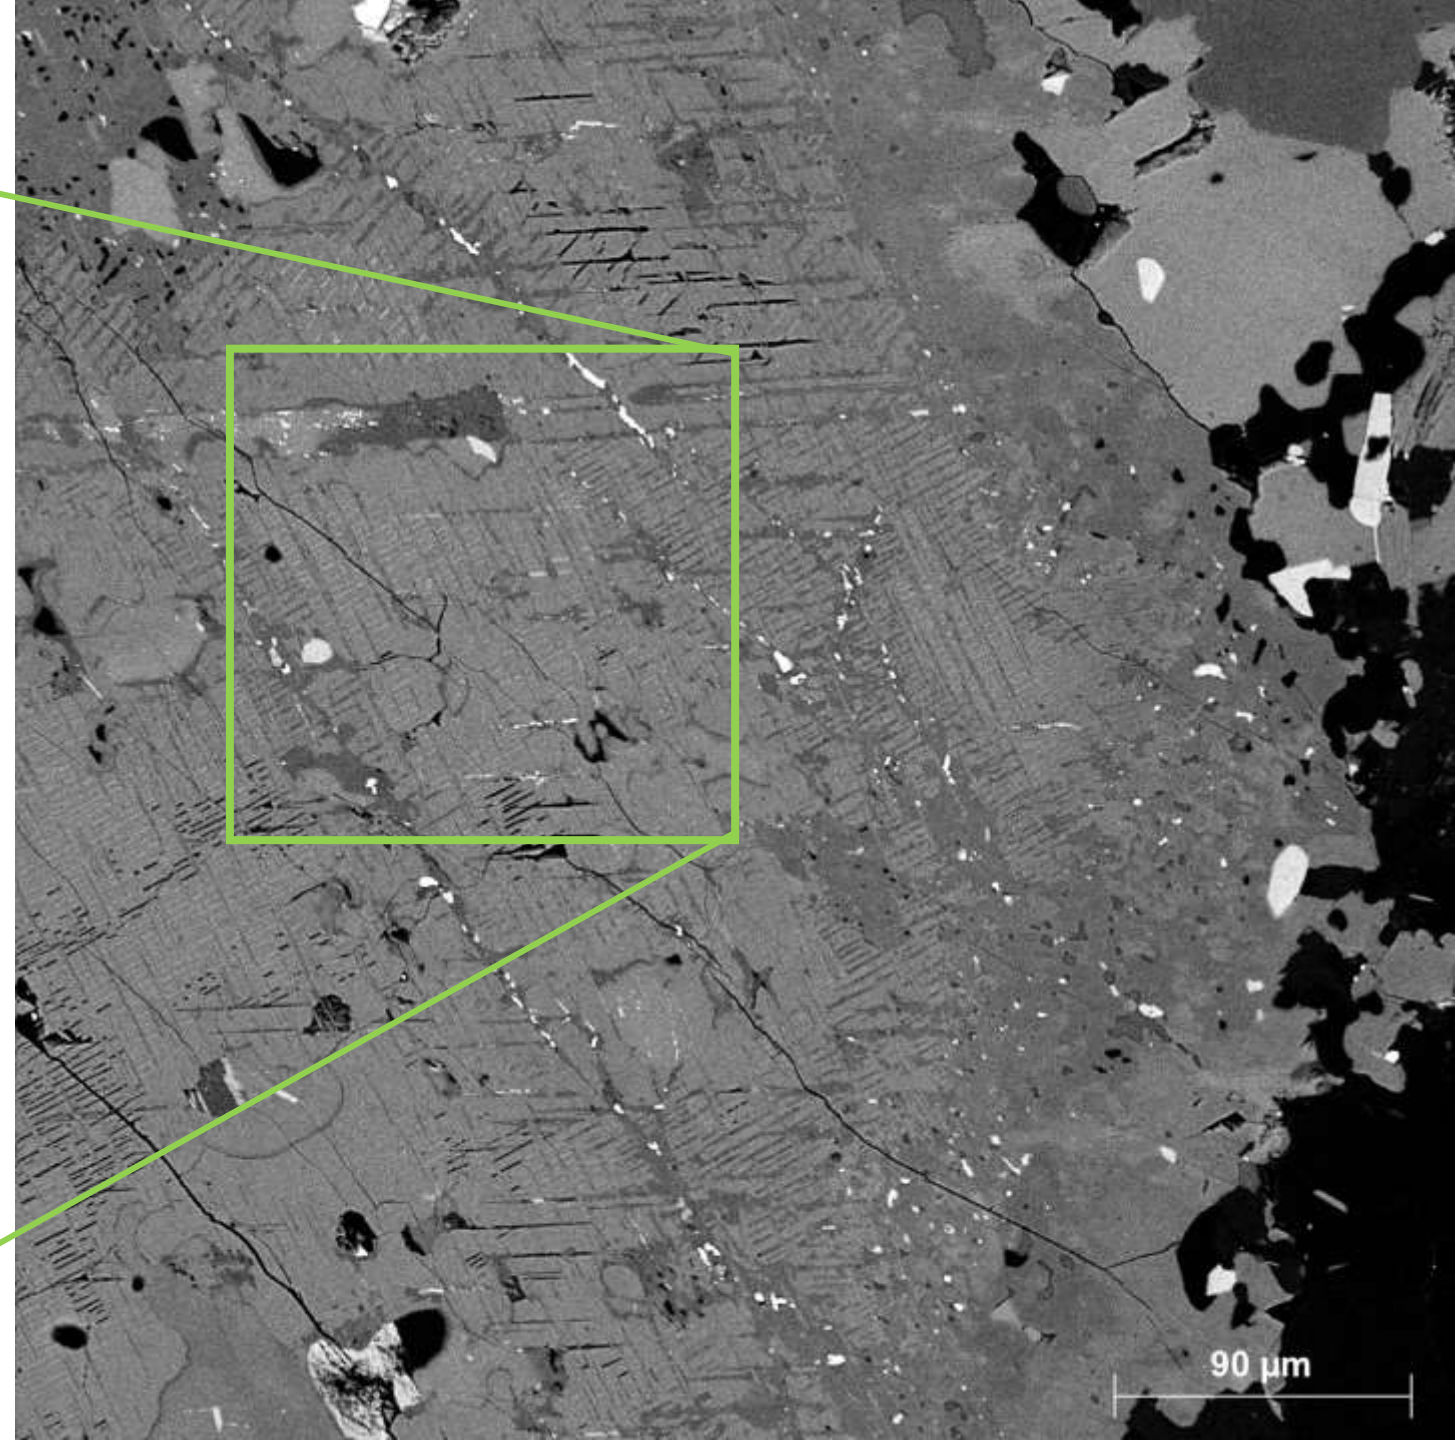



TR10

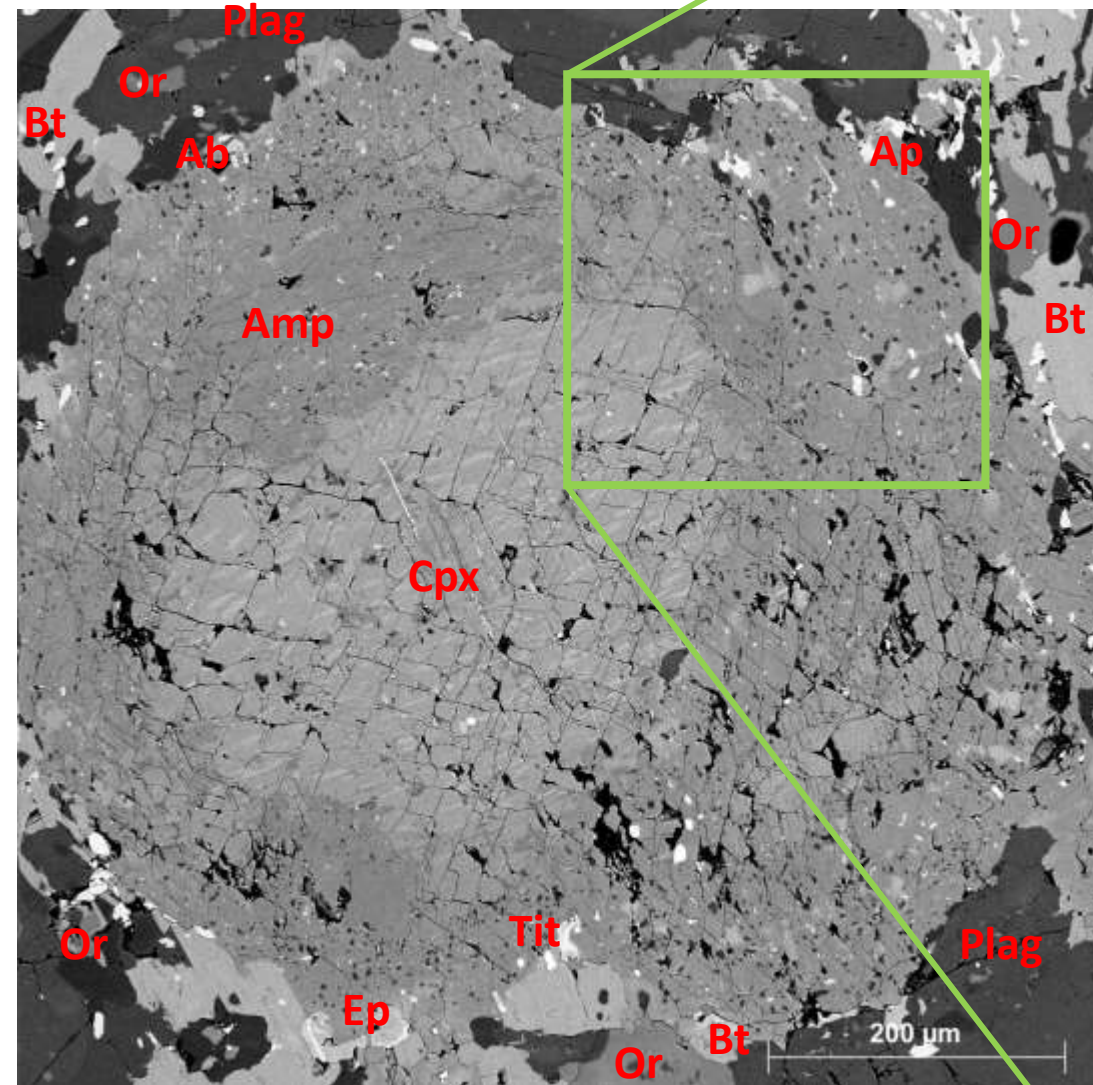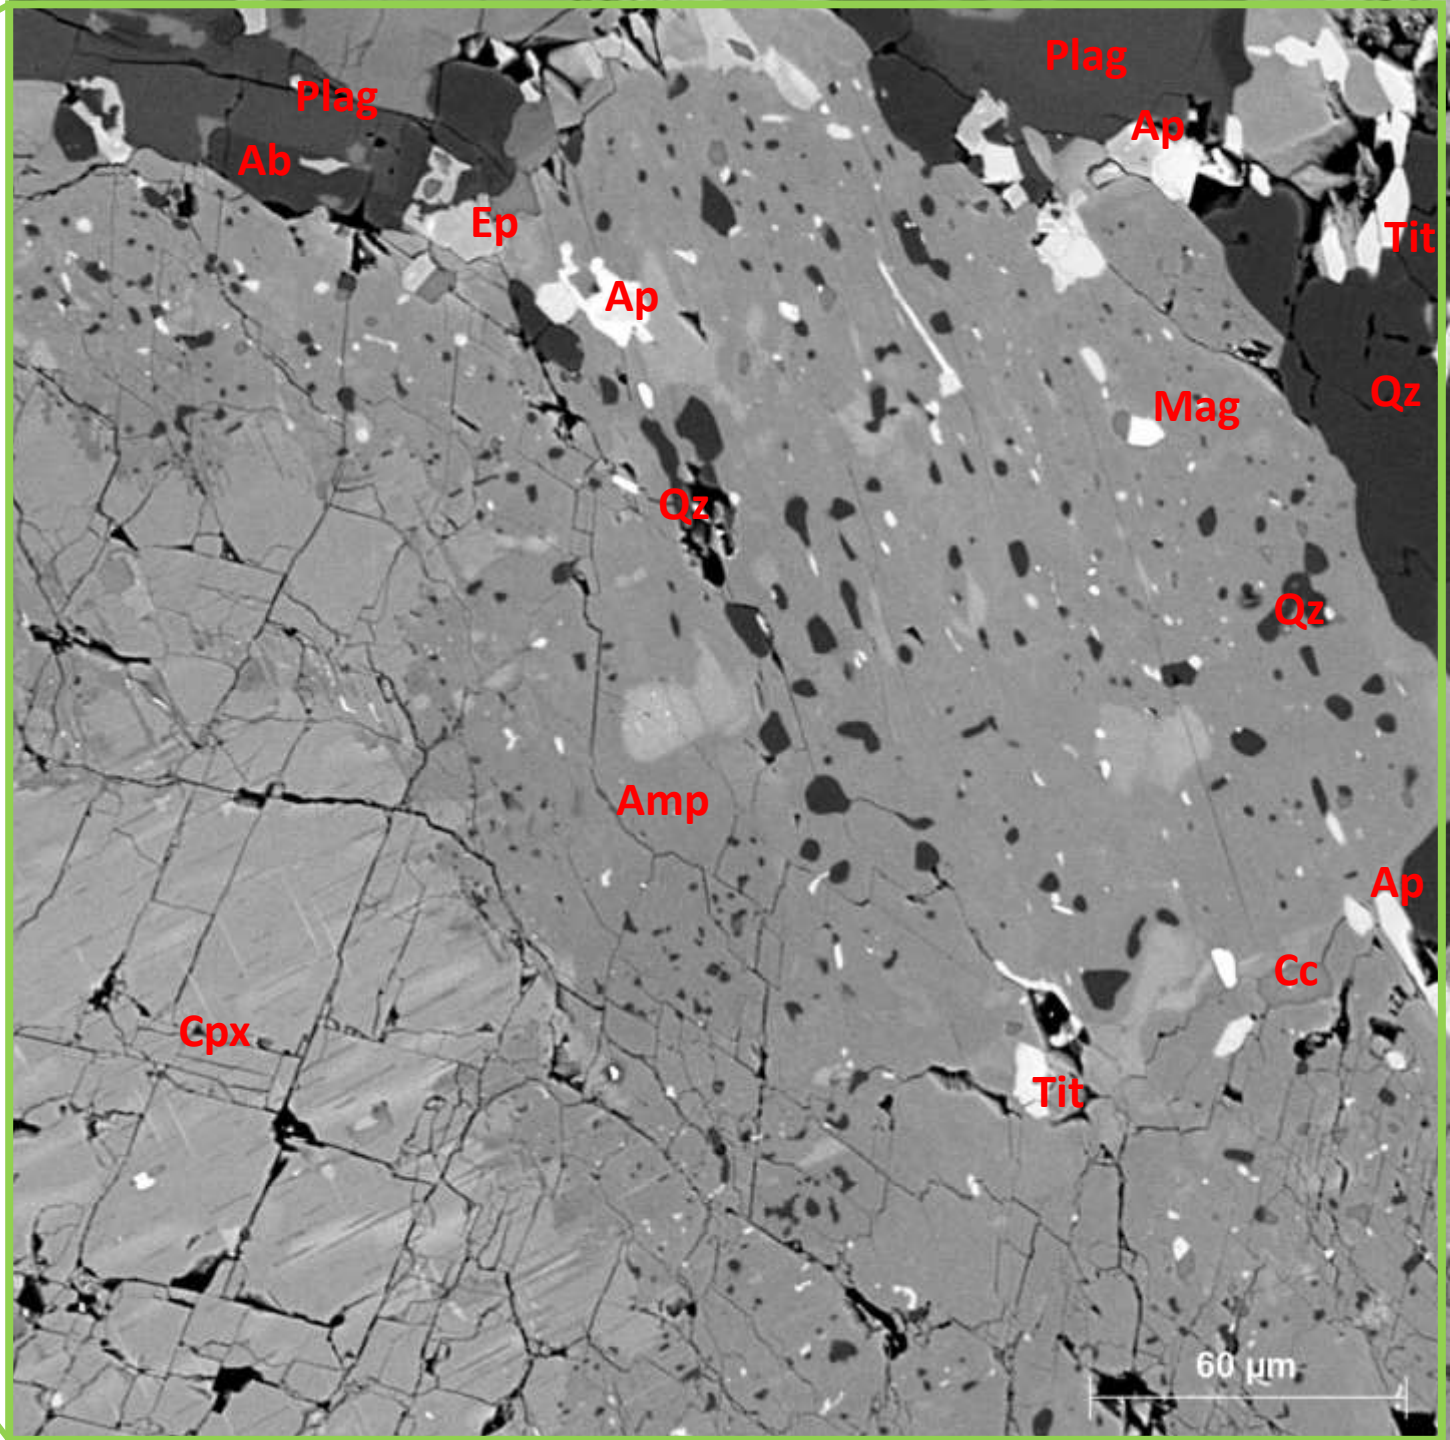



TR10

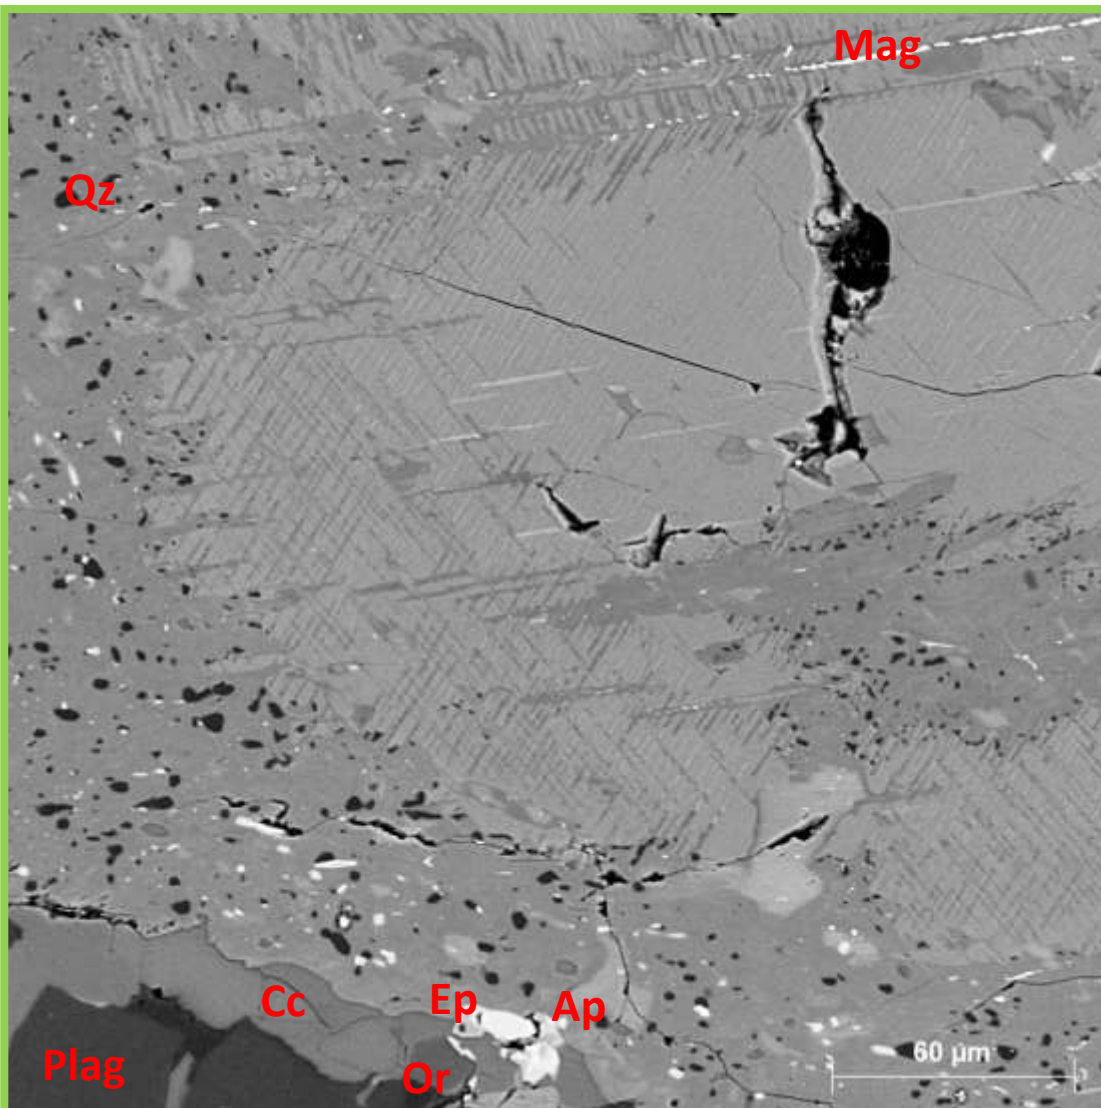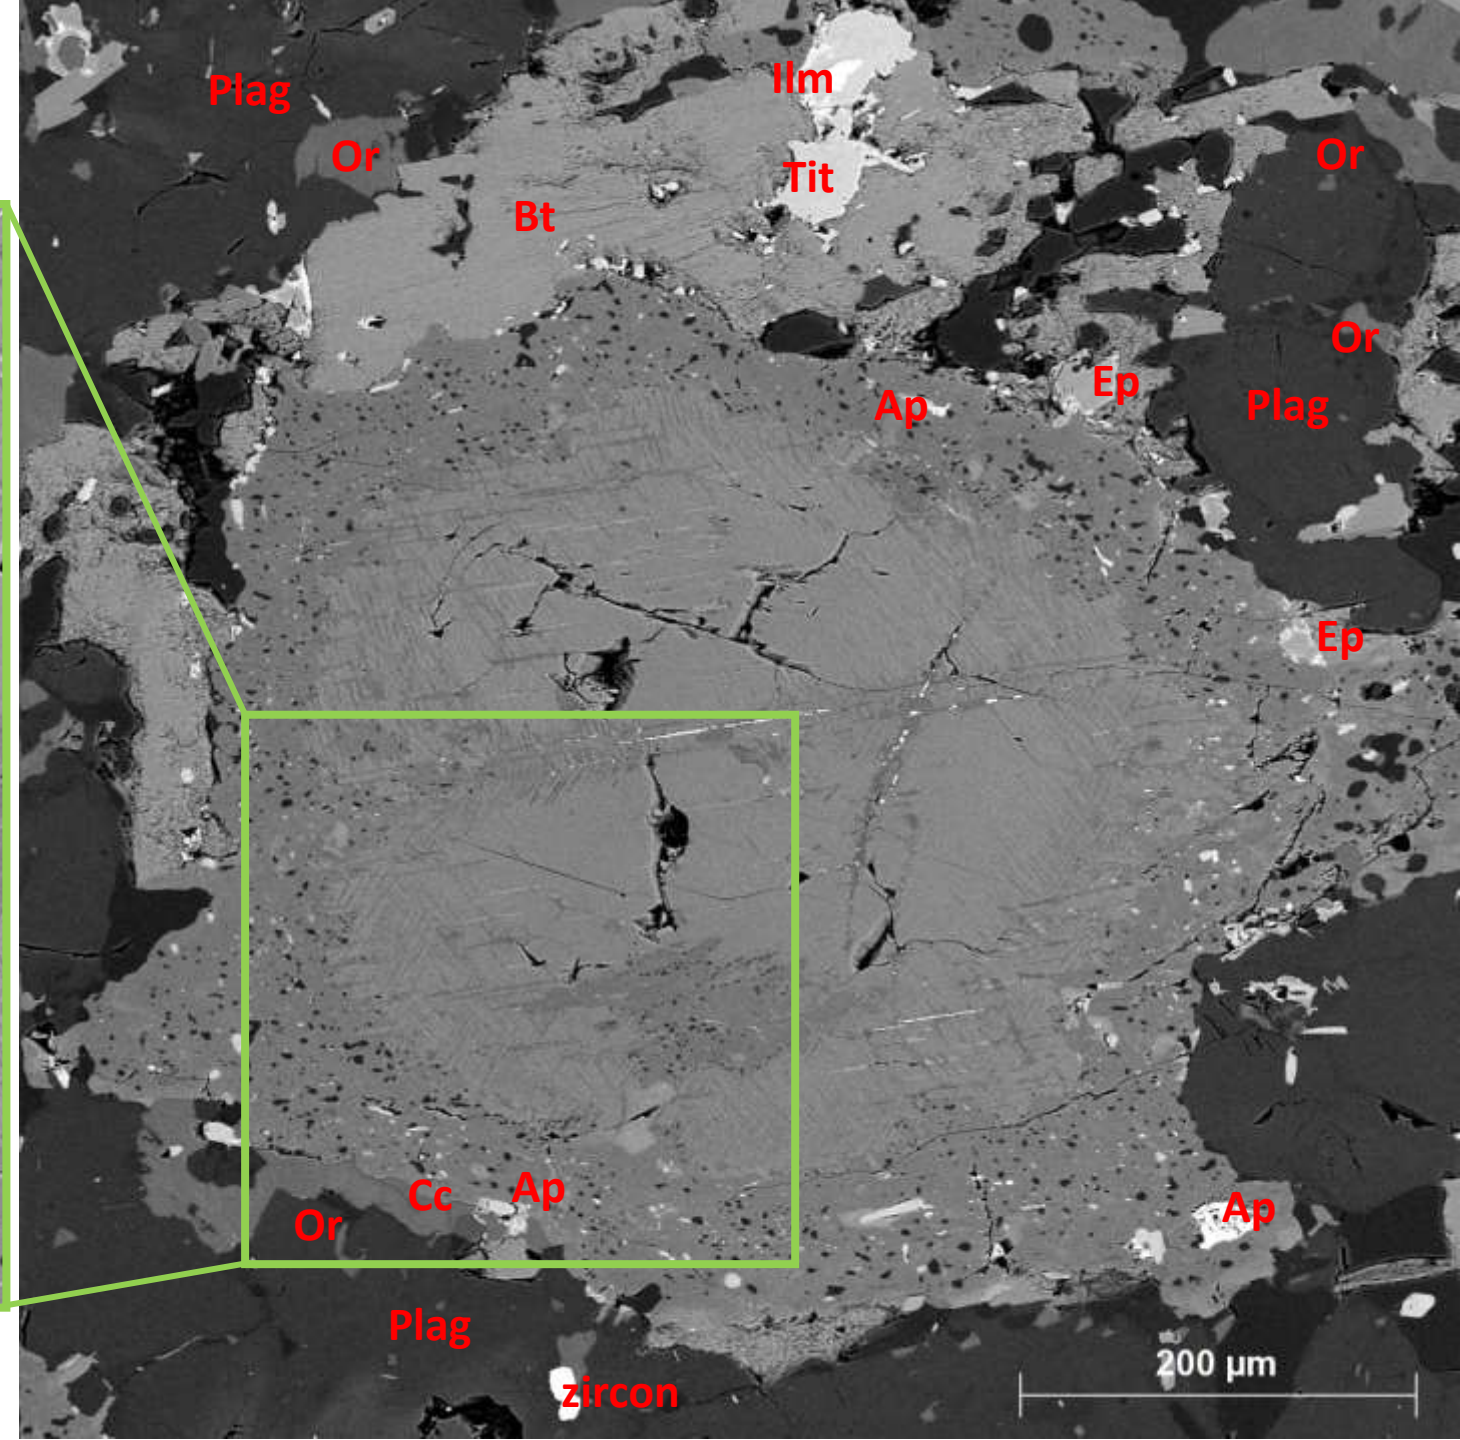

TR13

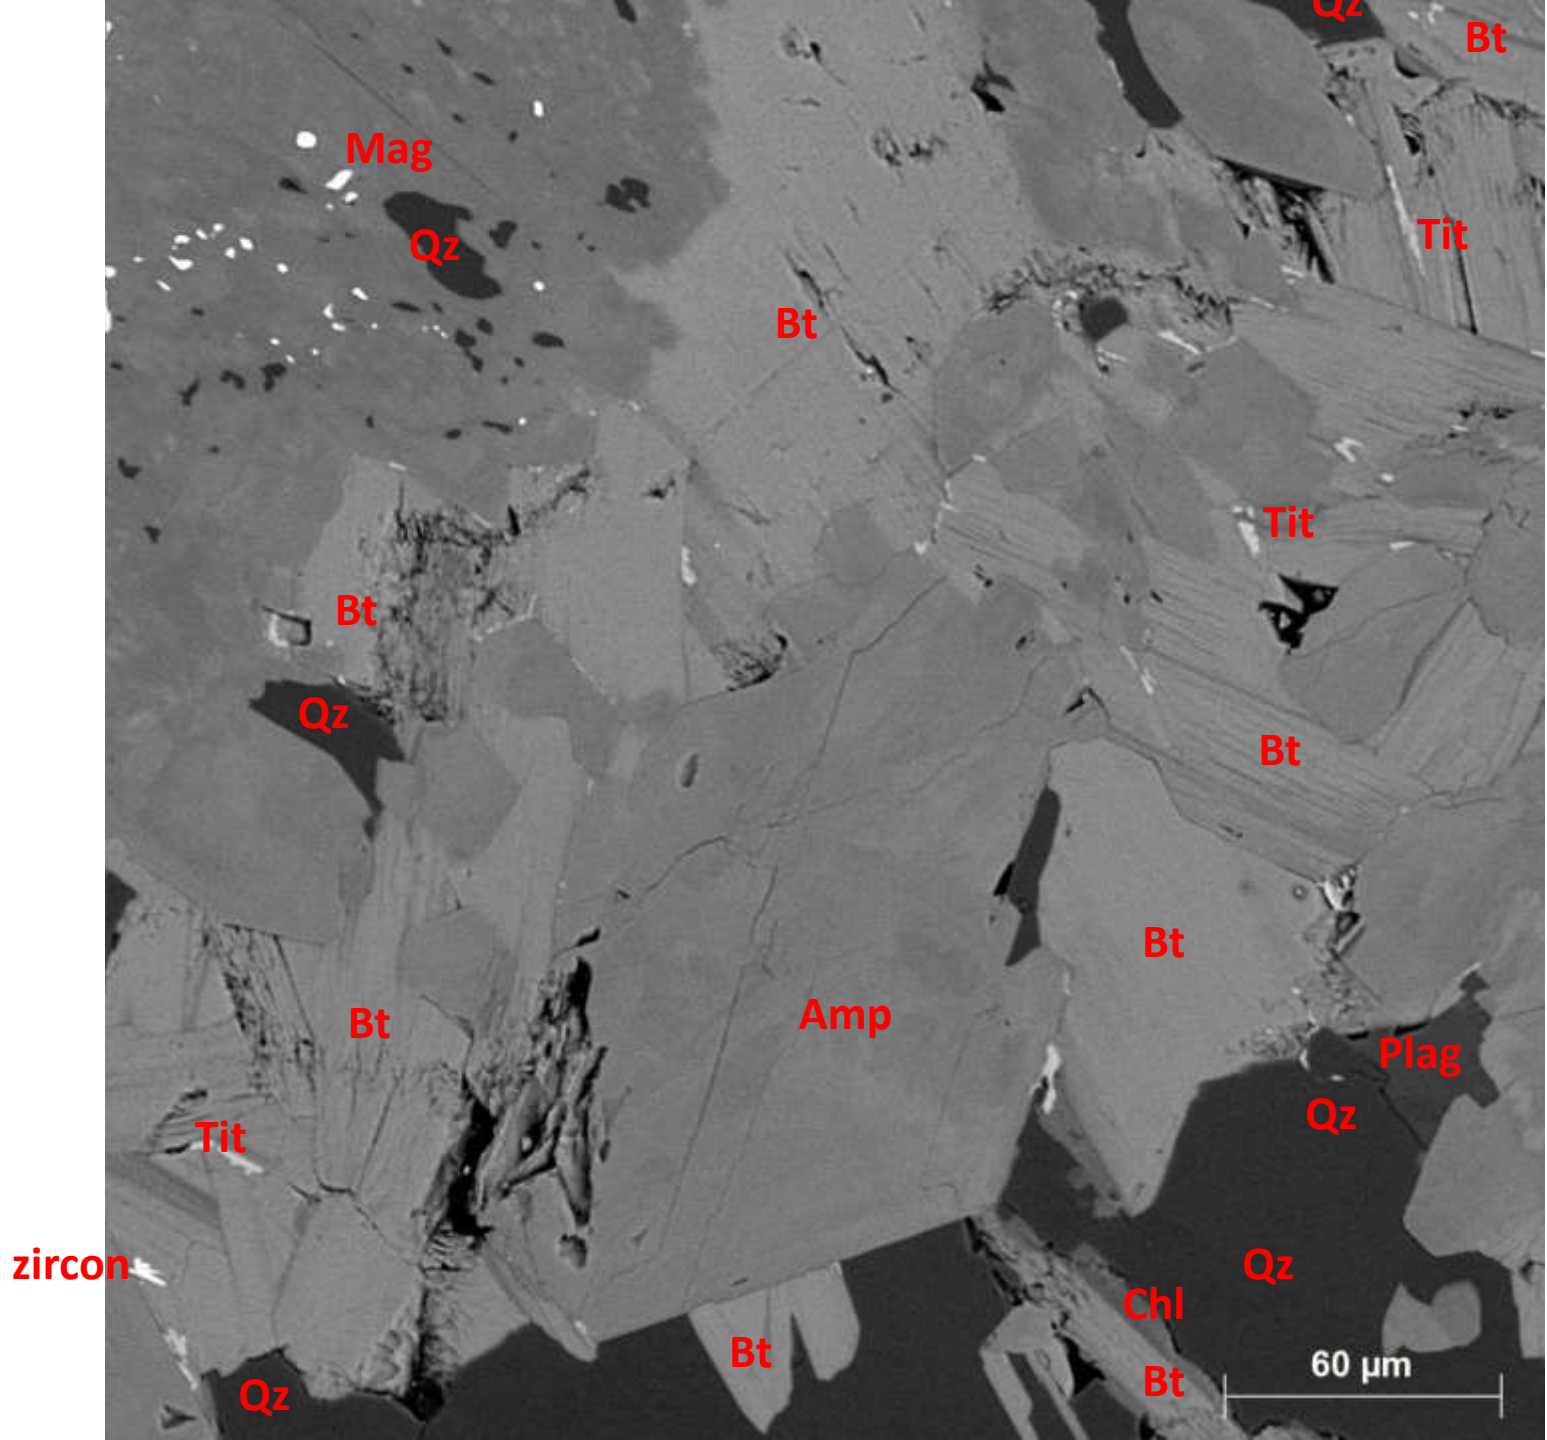



TR13

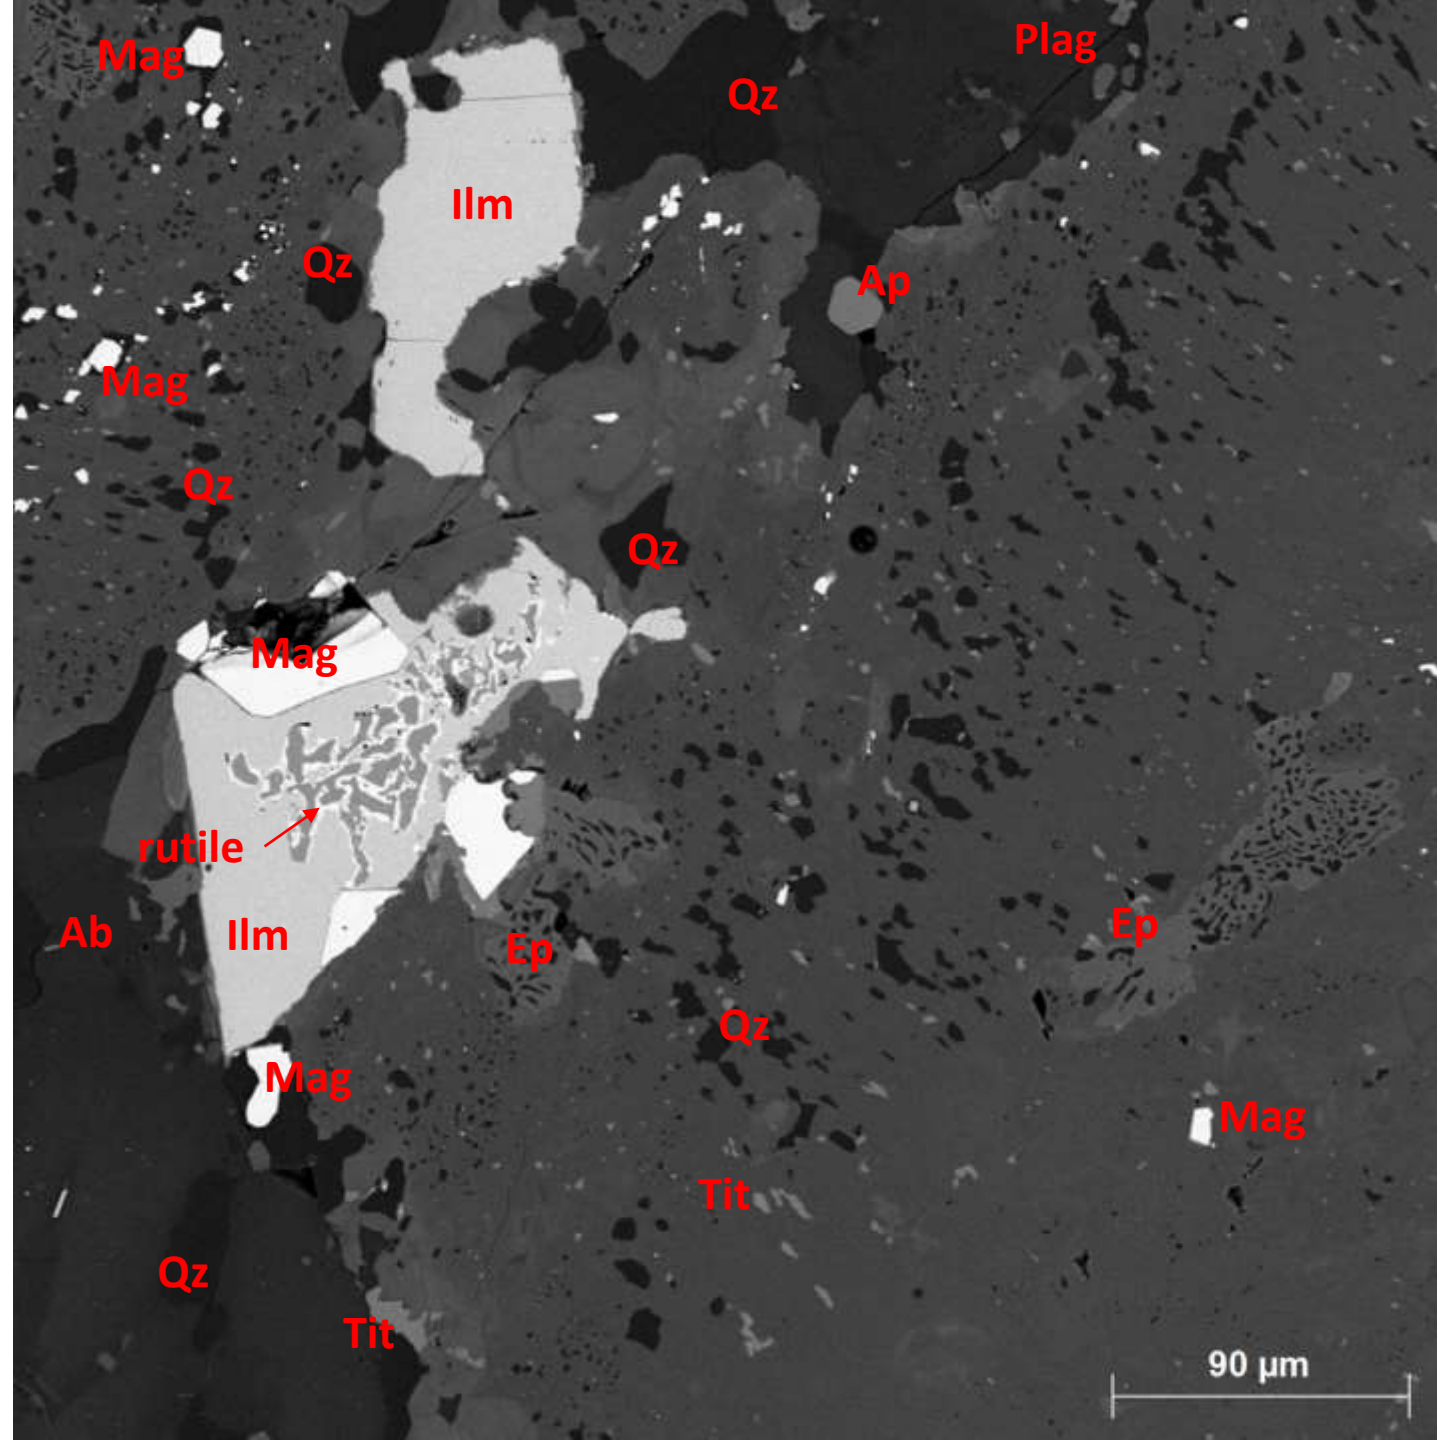

TR13

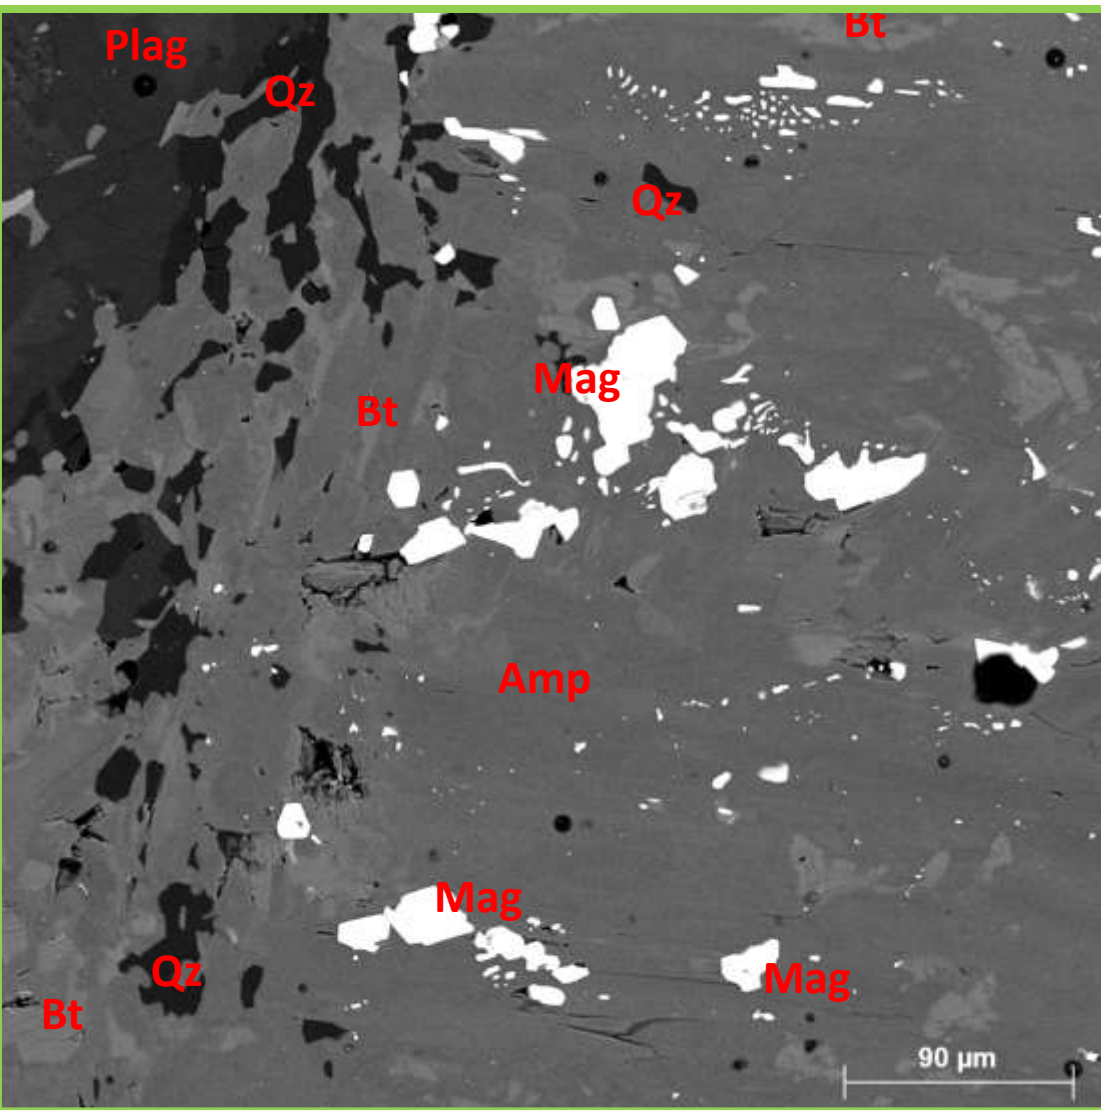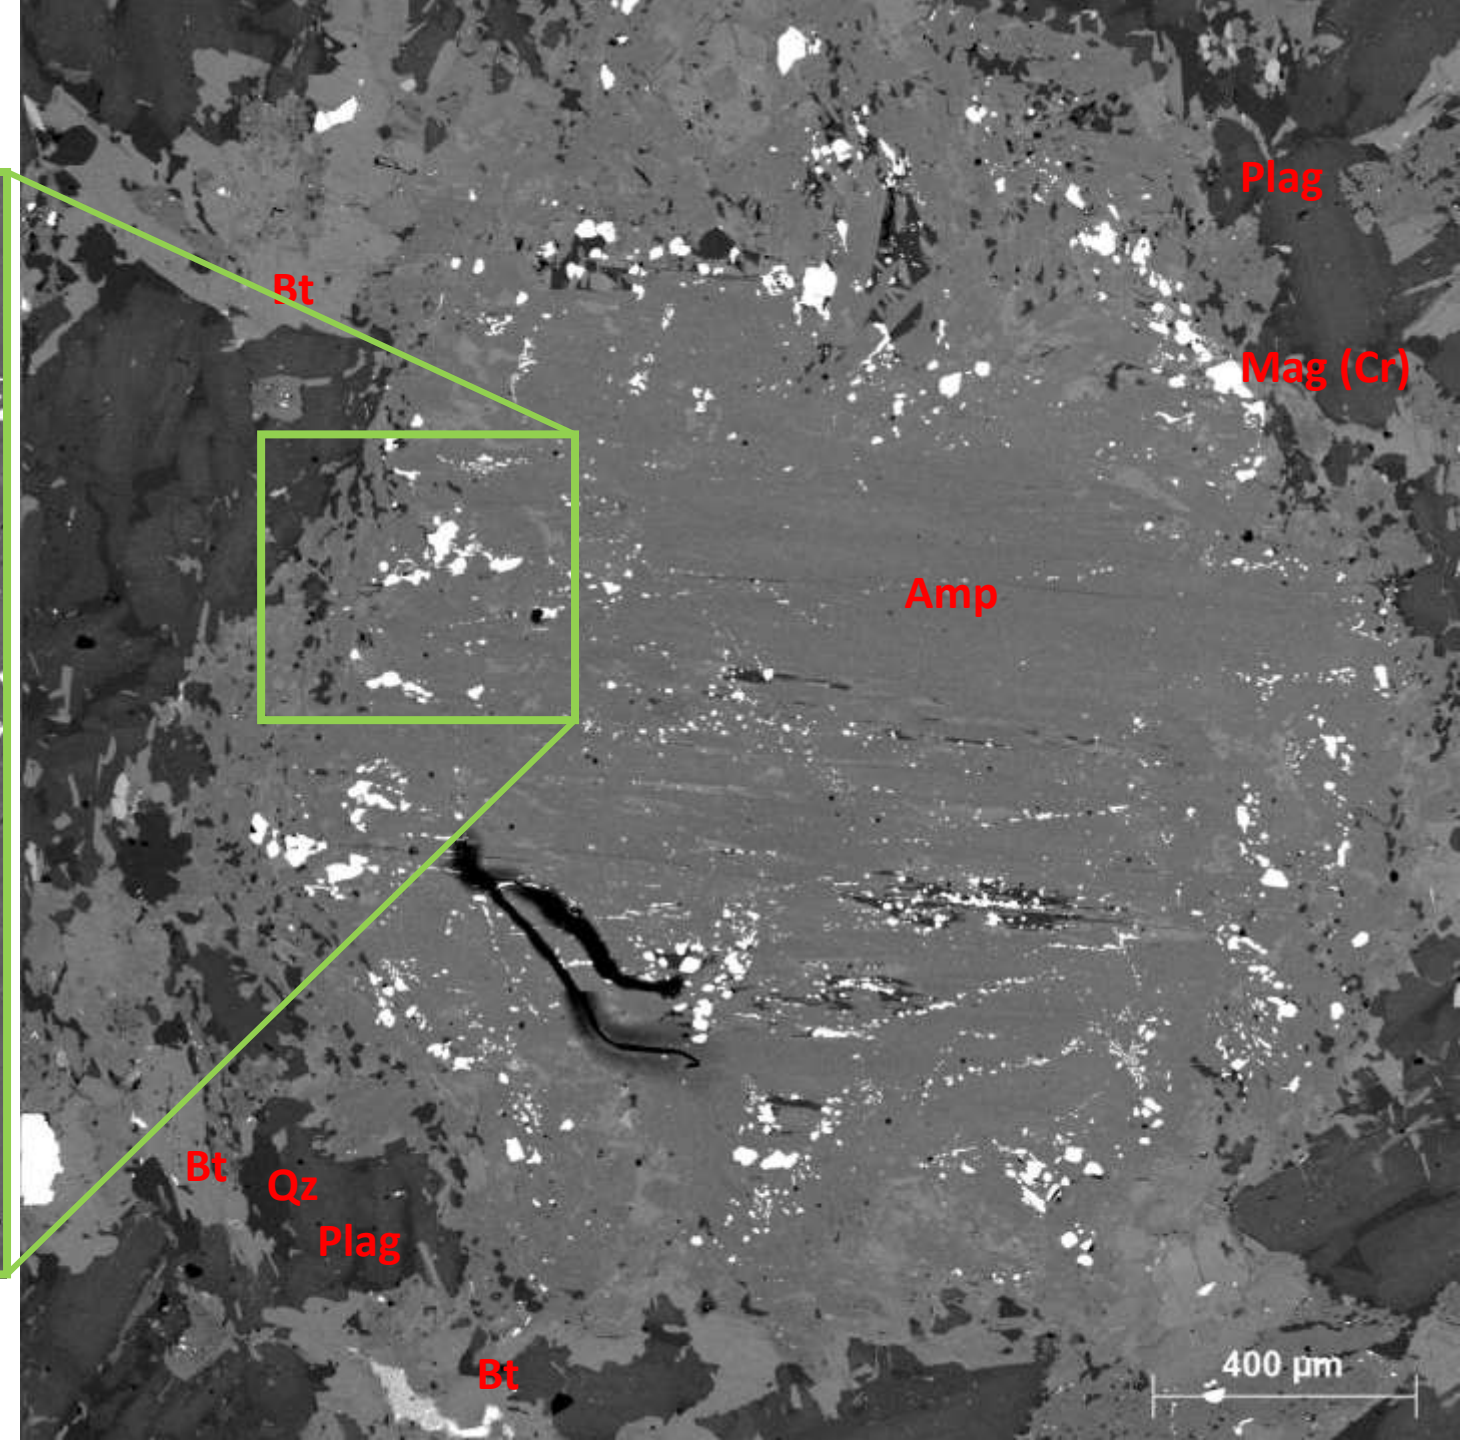



TR13

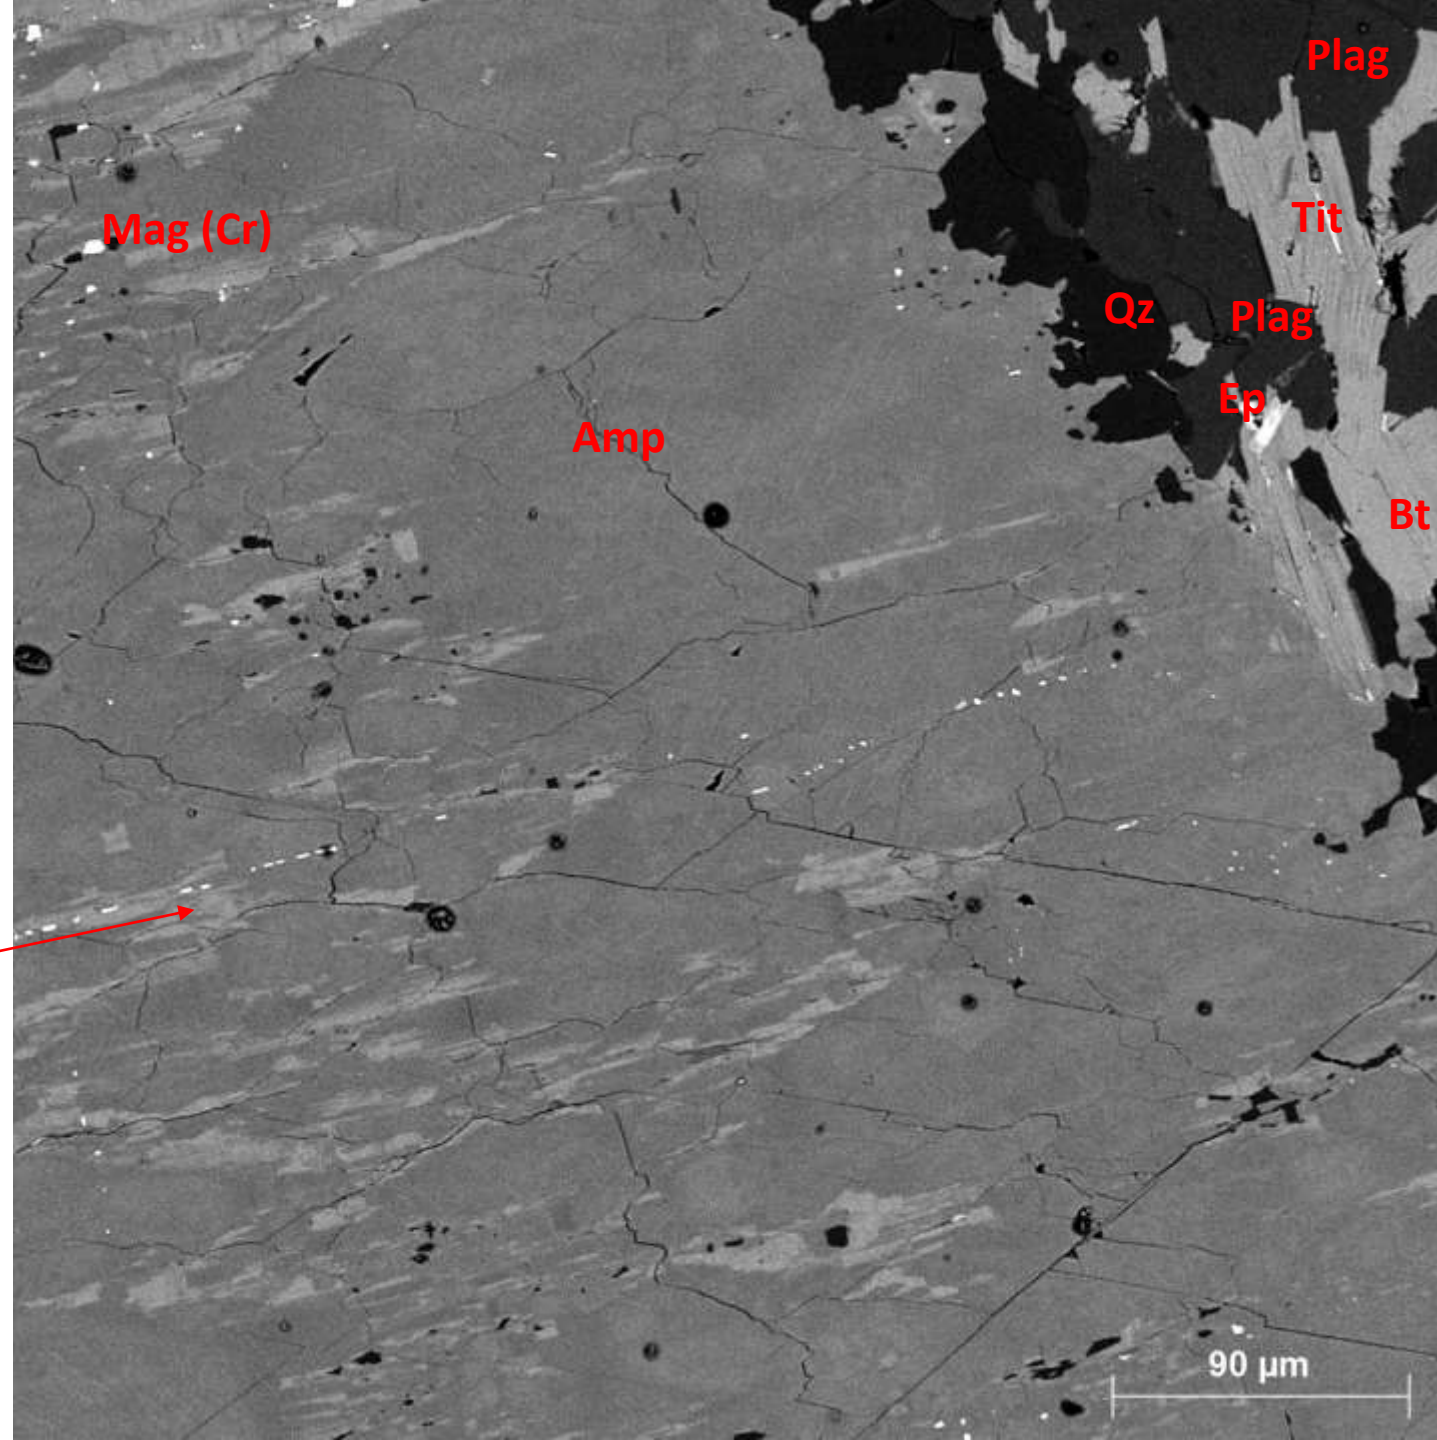

TR13

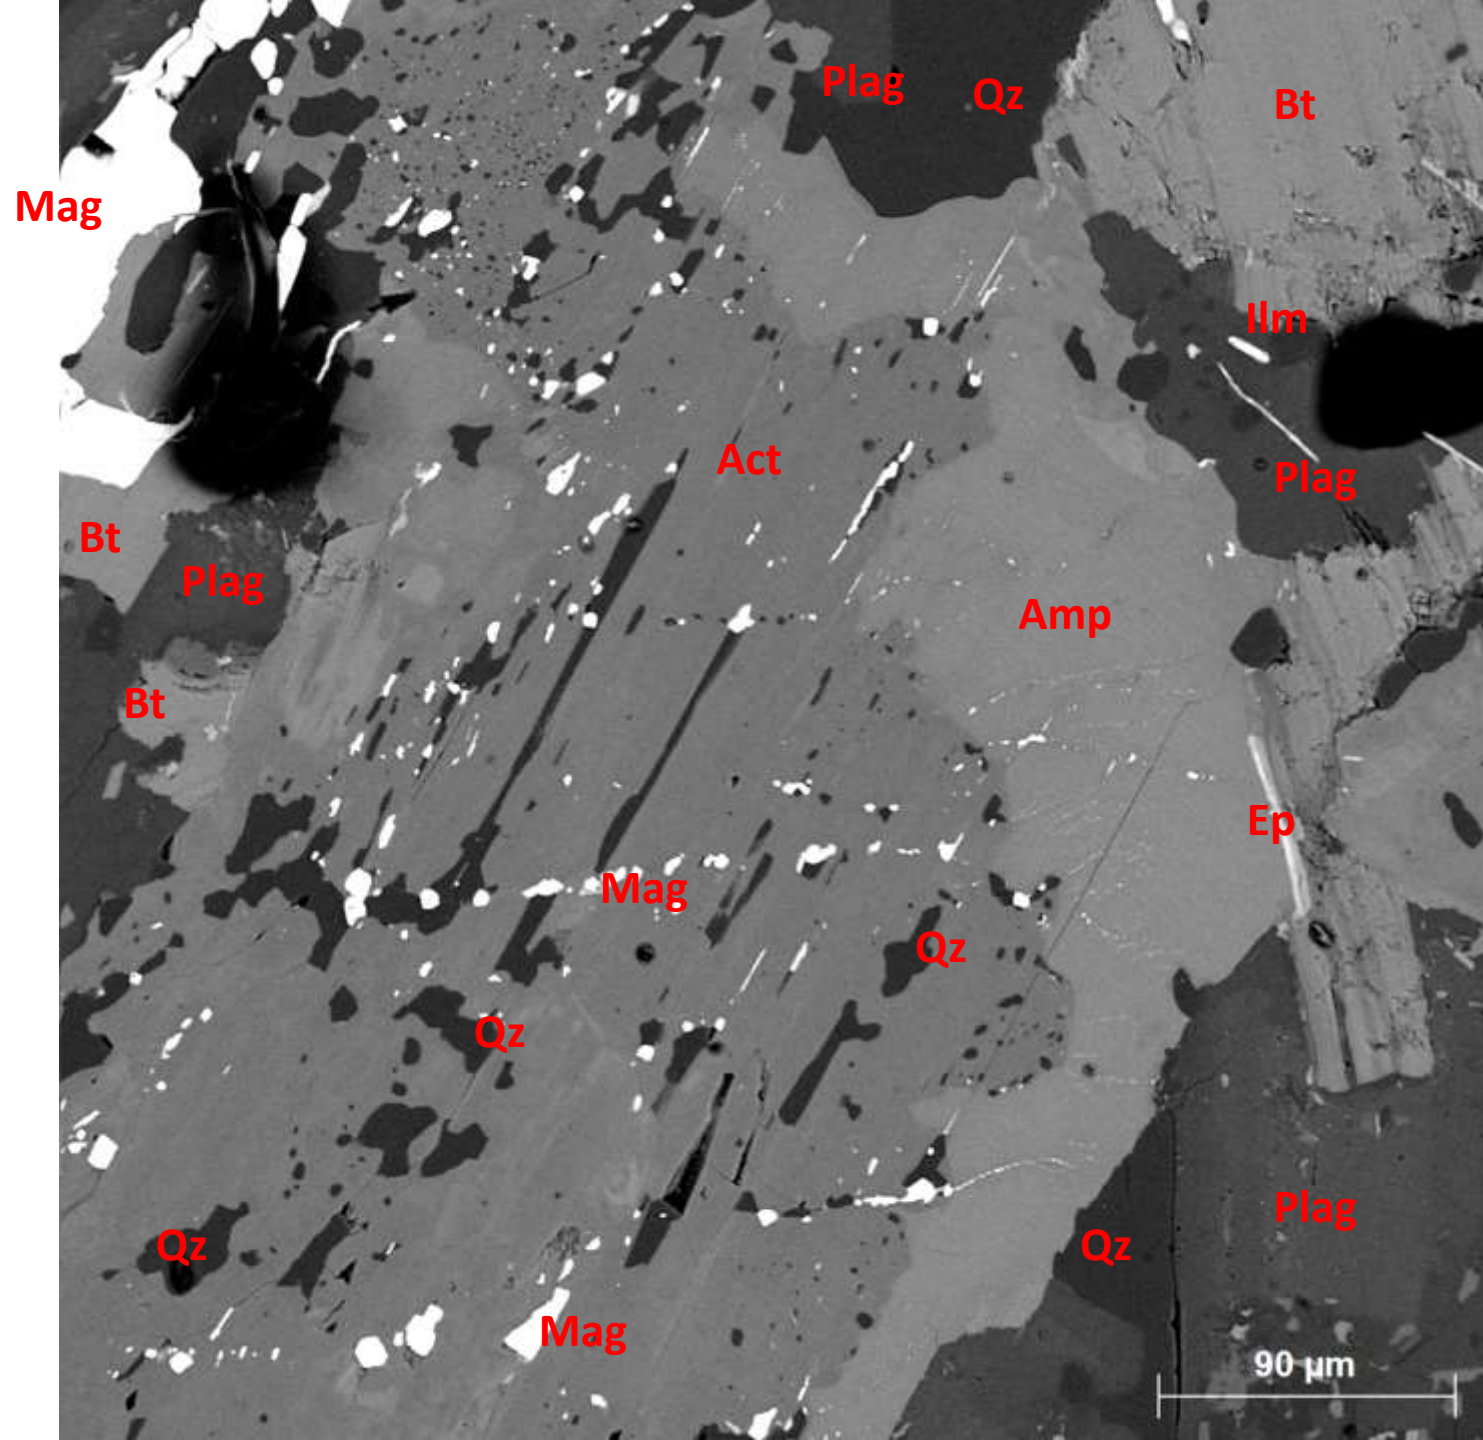



TR15

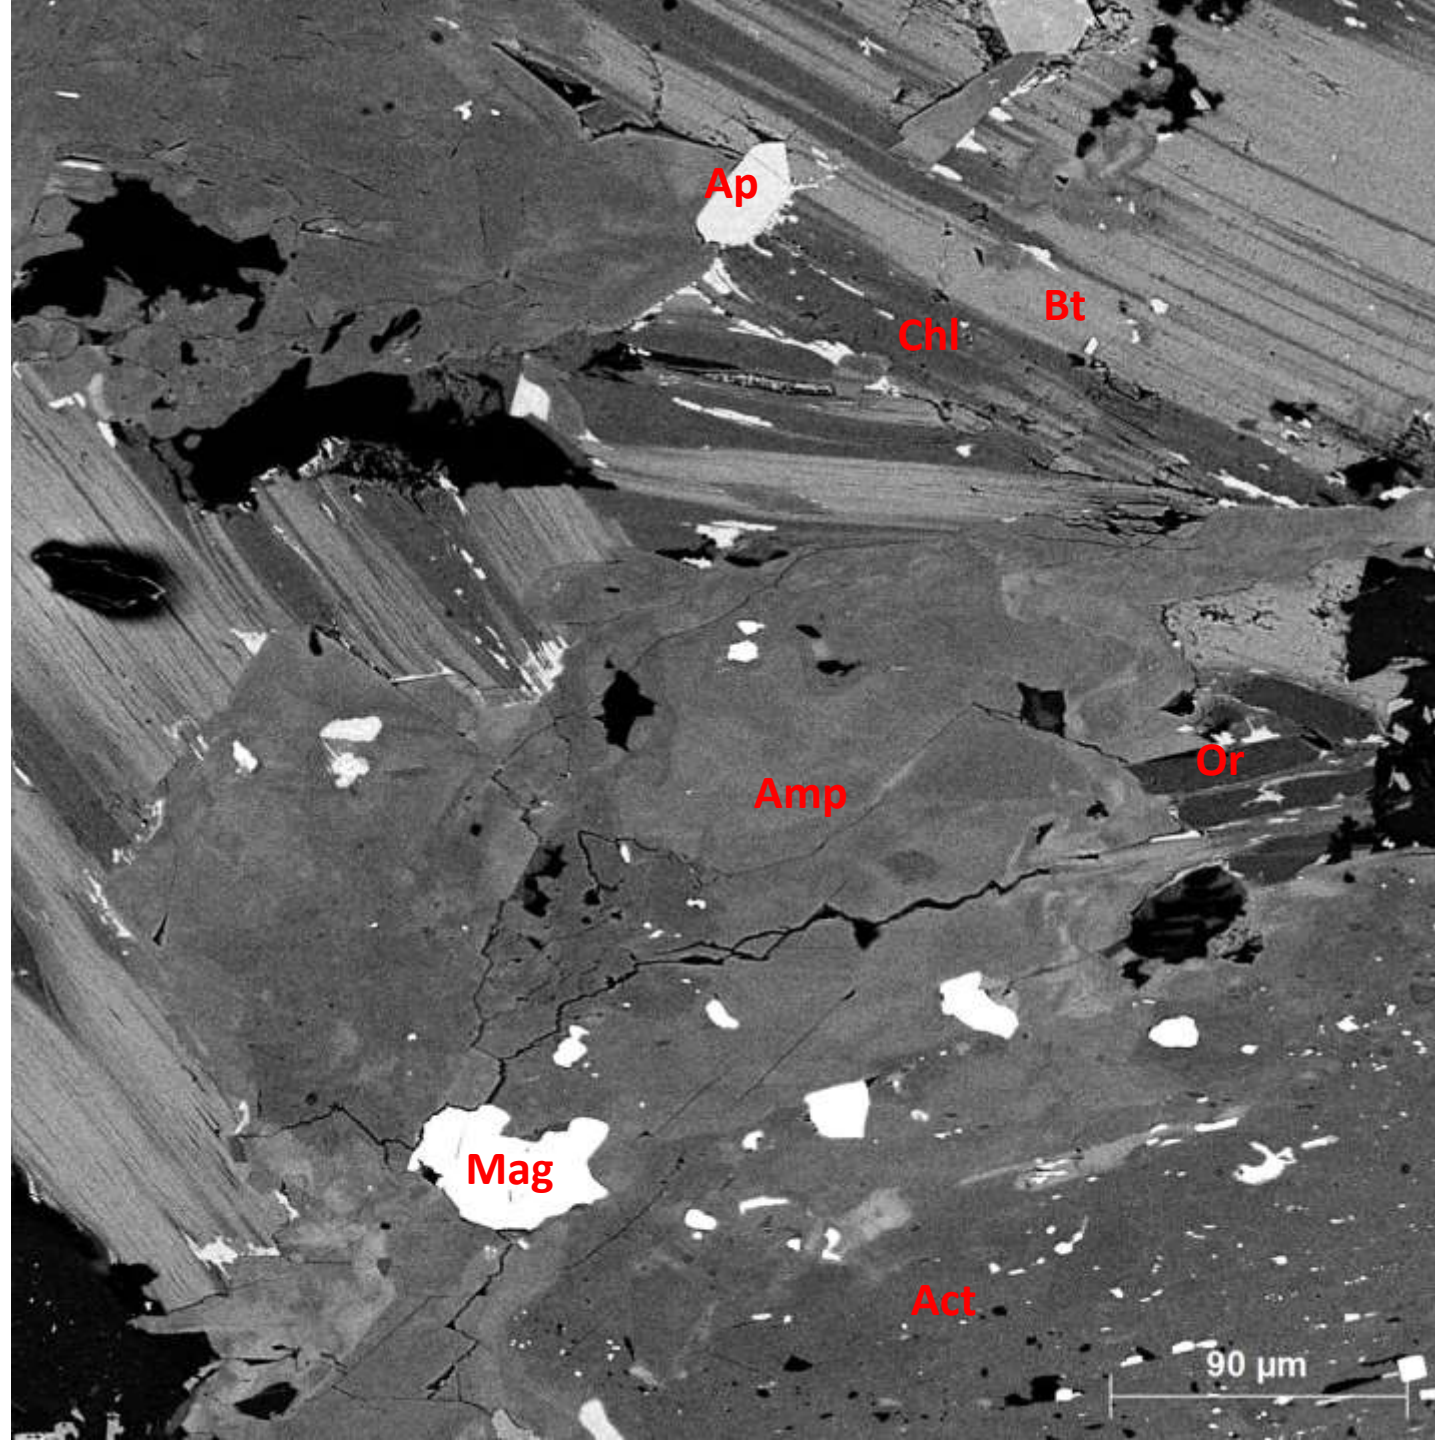

TR15

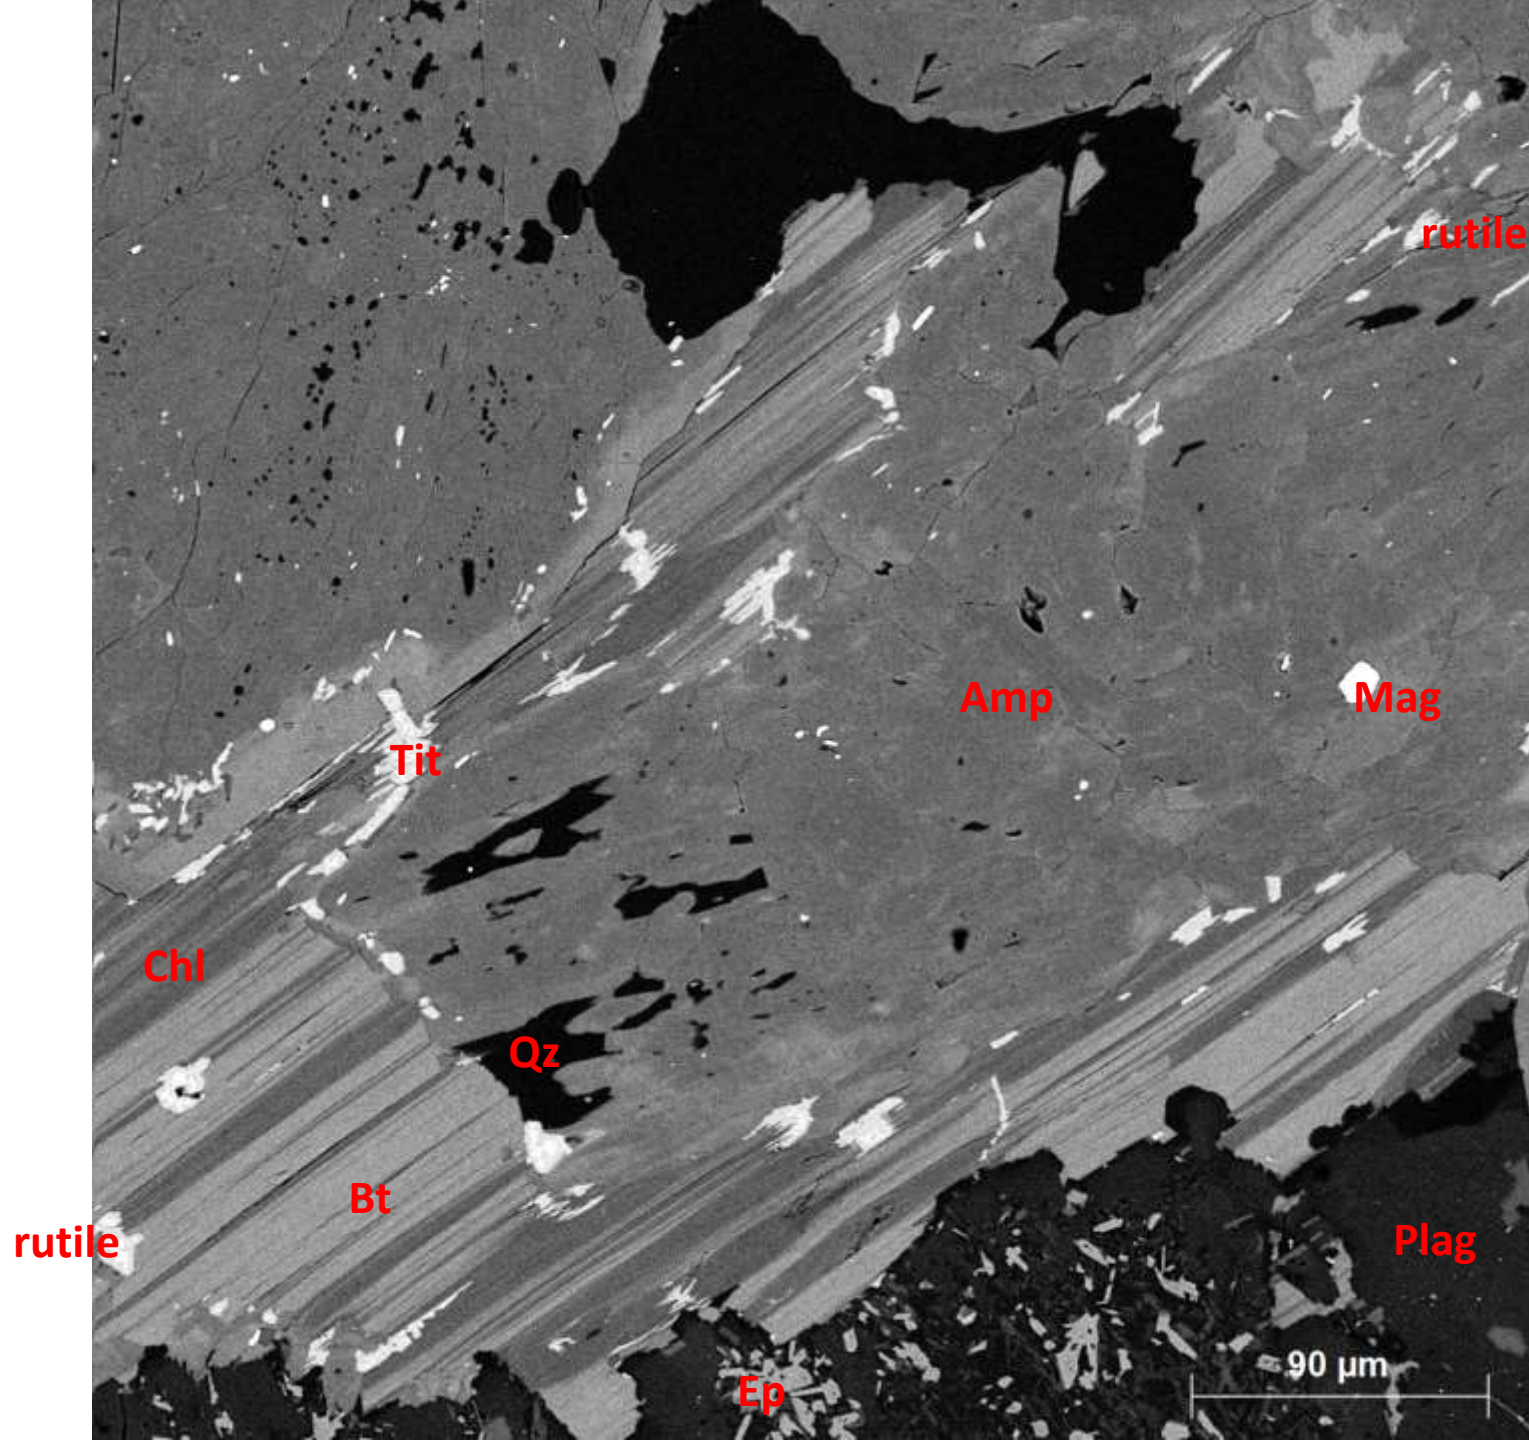



TR15

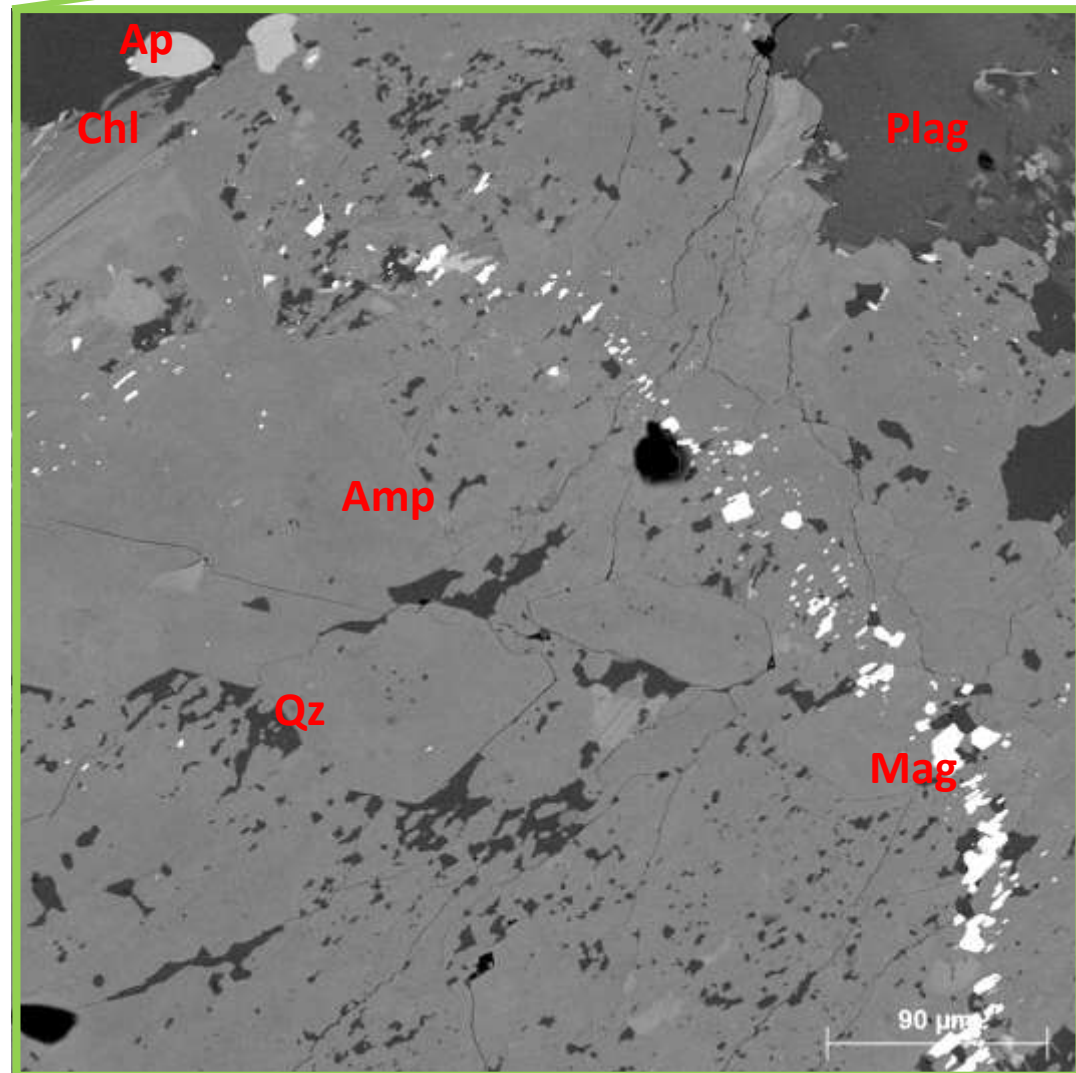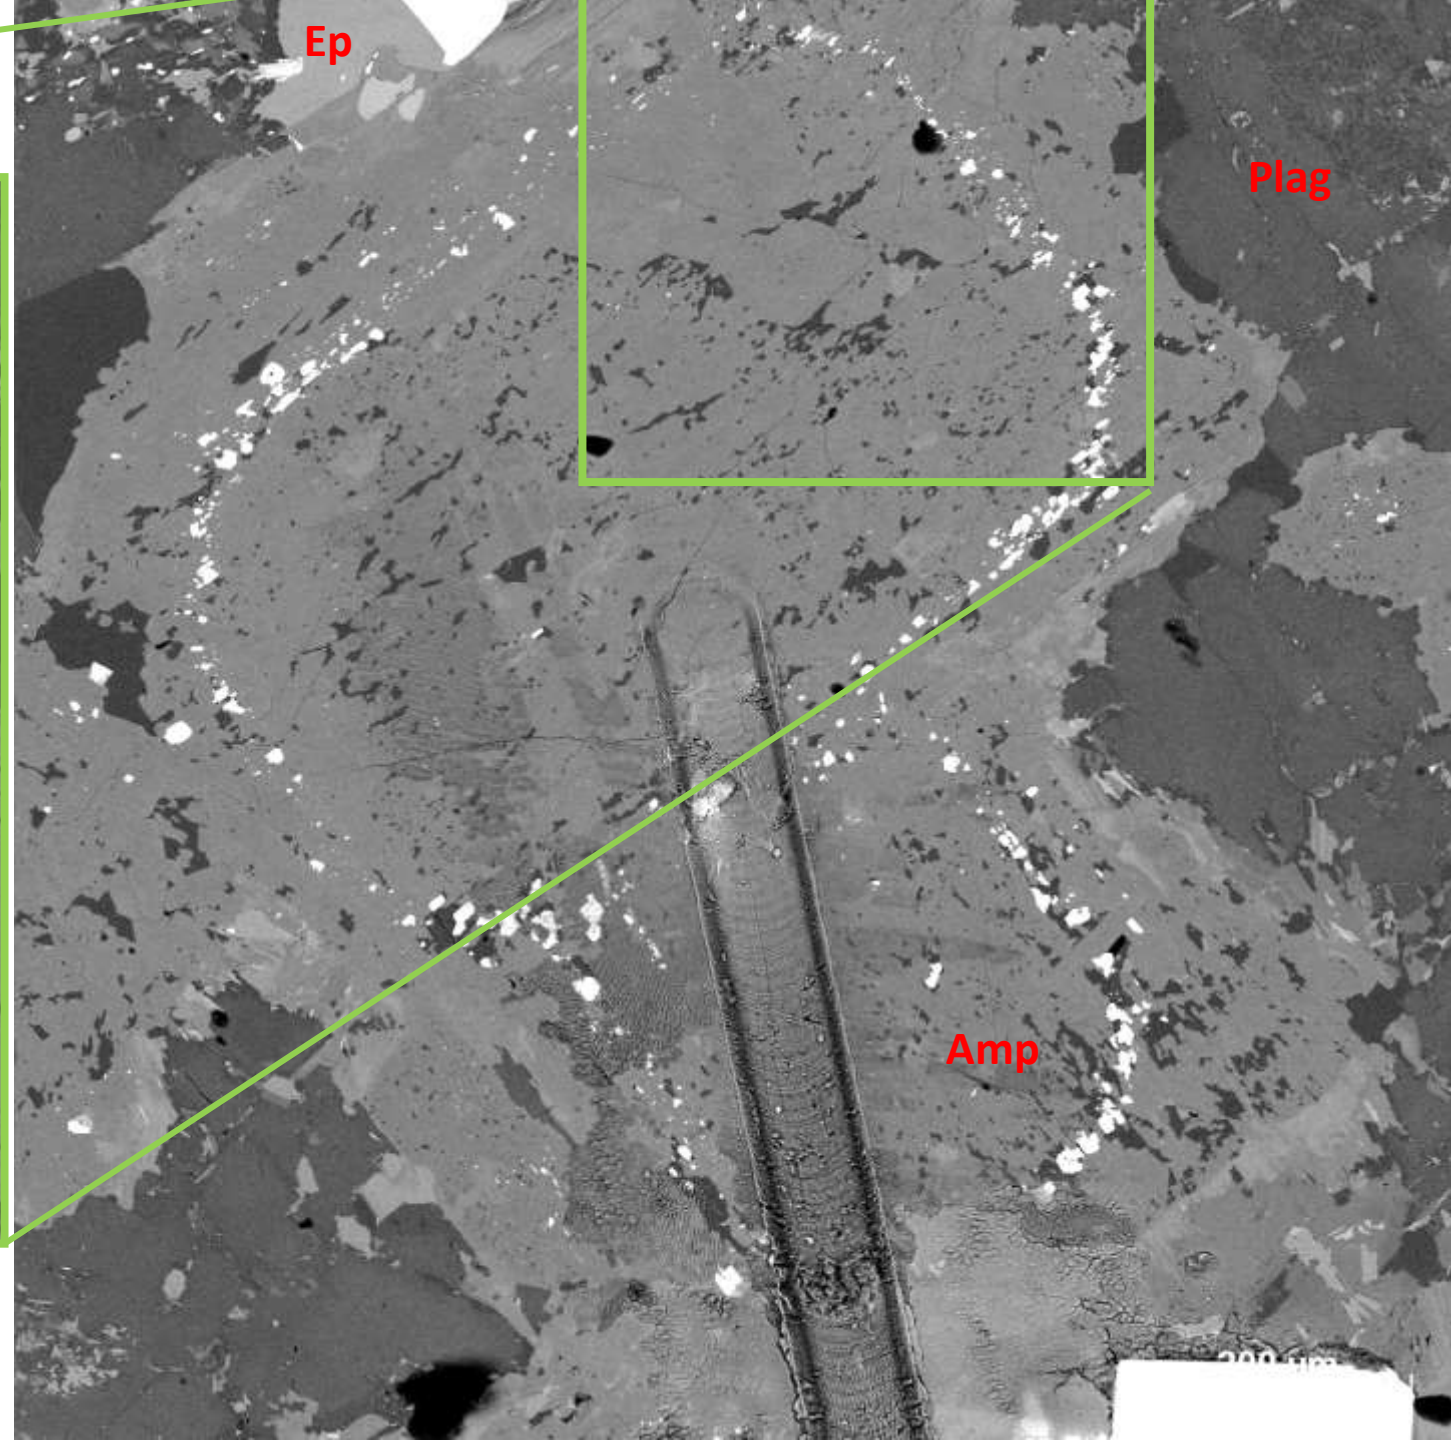

TR21

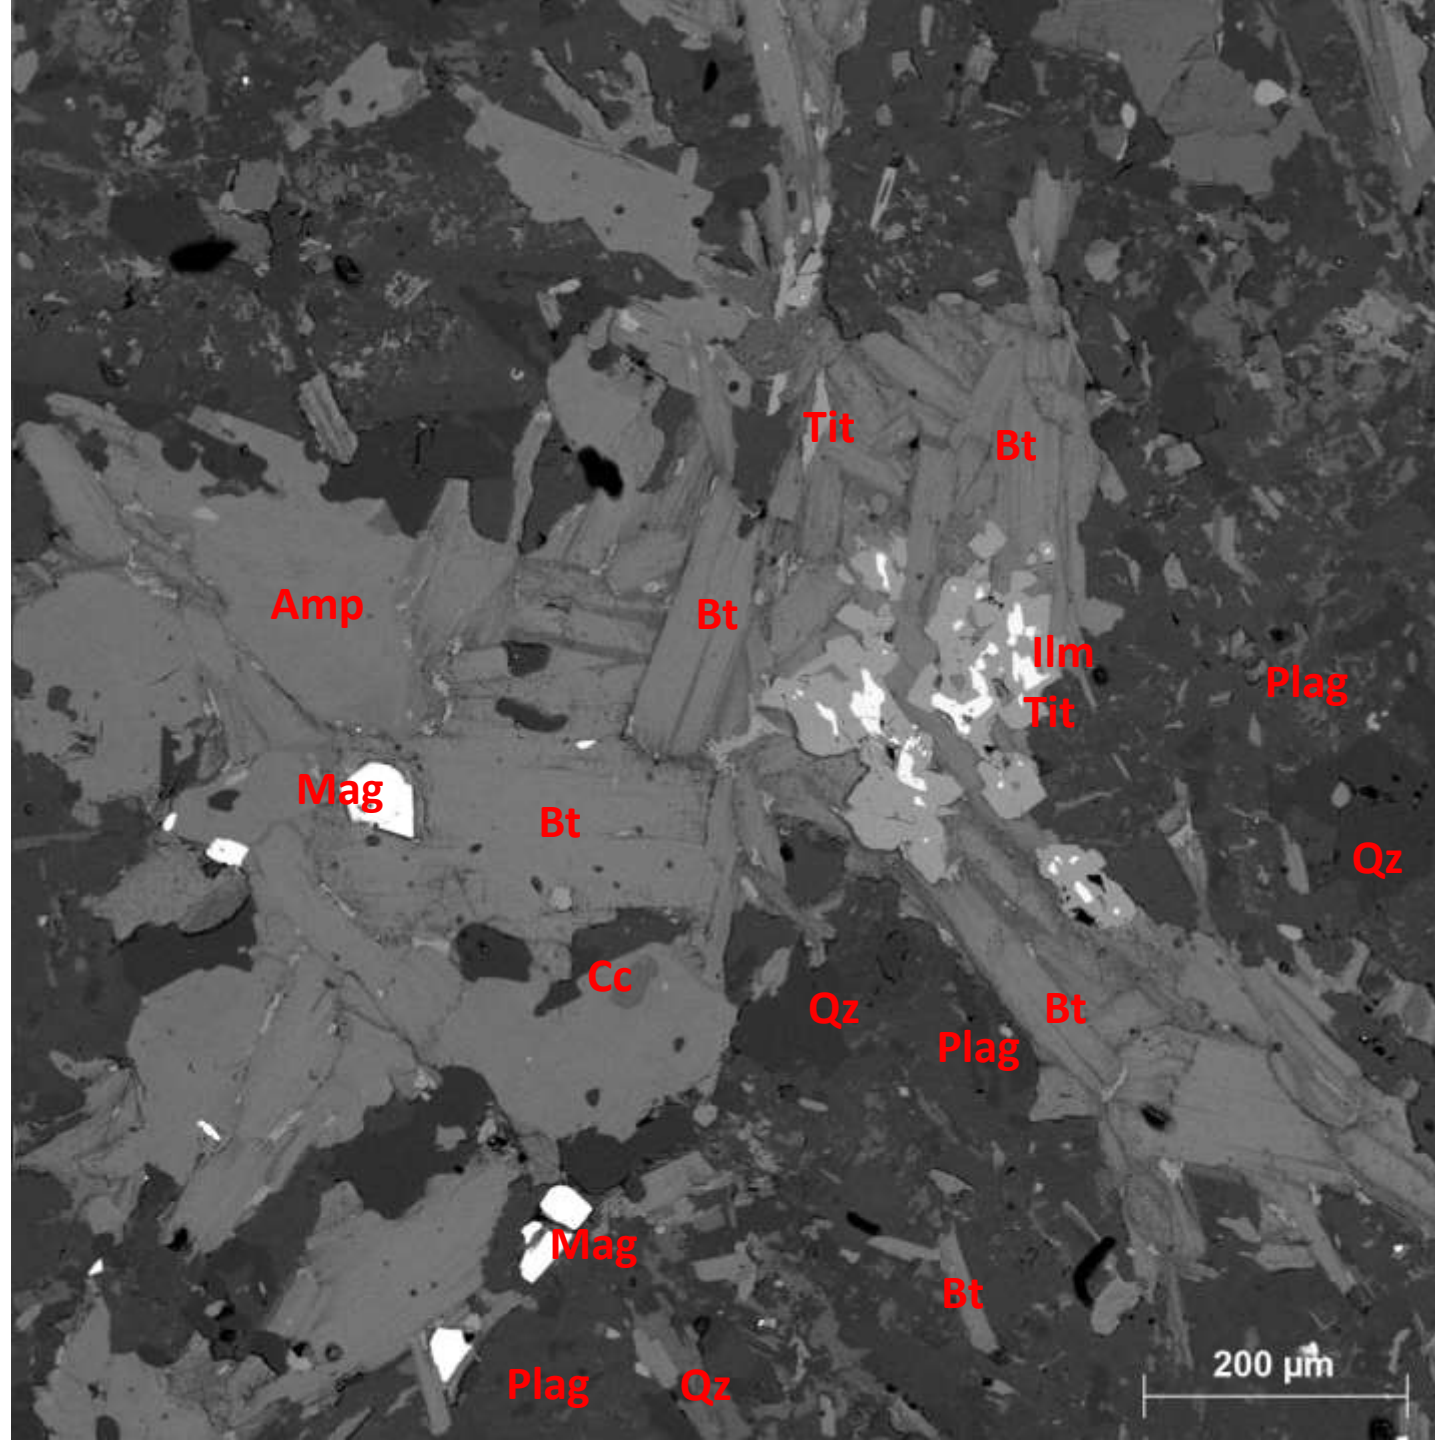



TR26

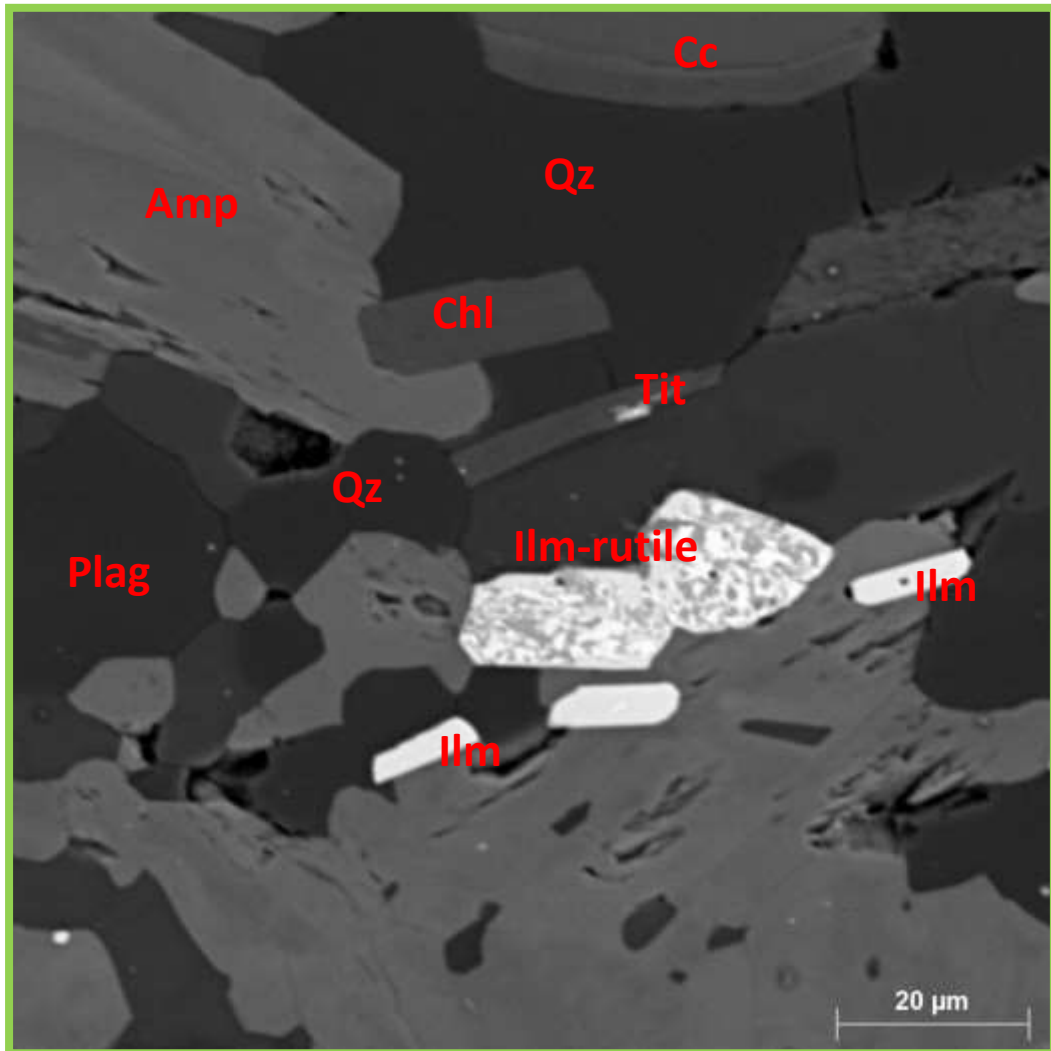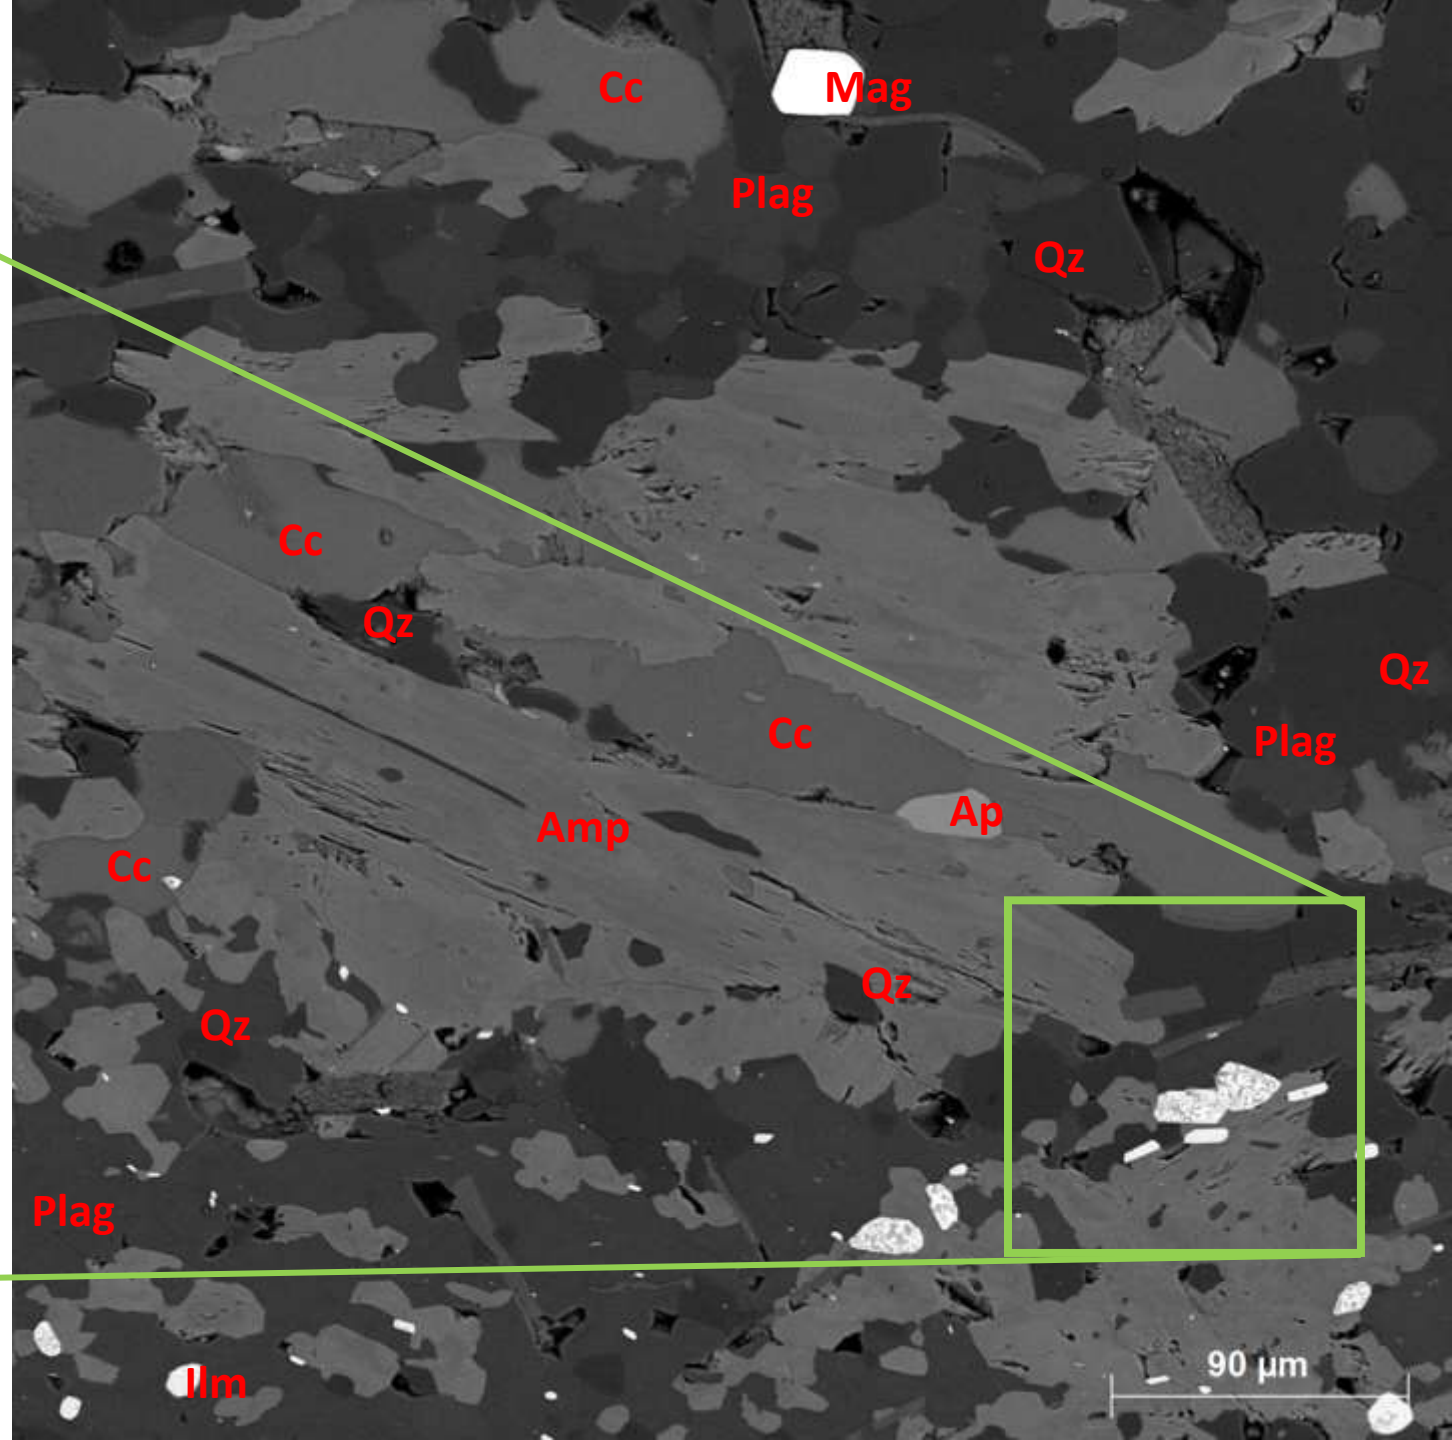

TR29

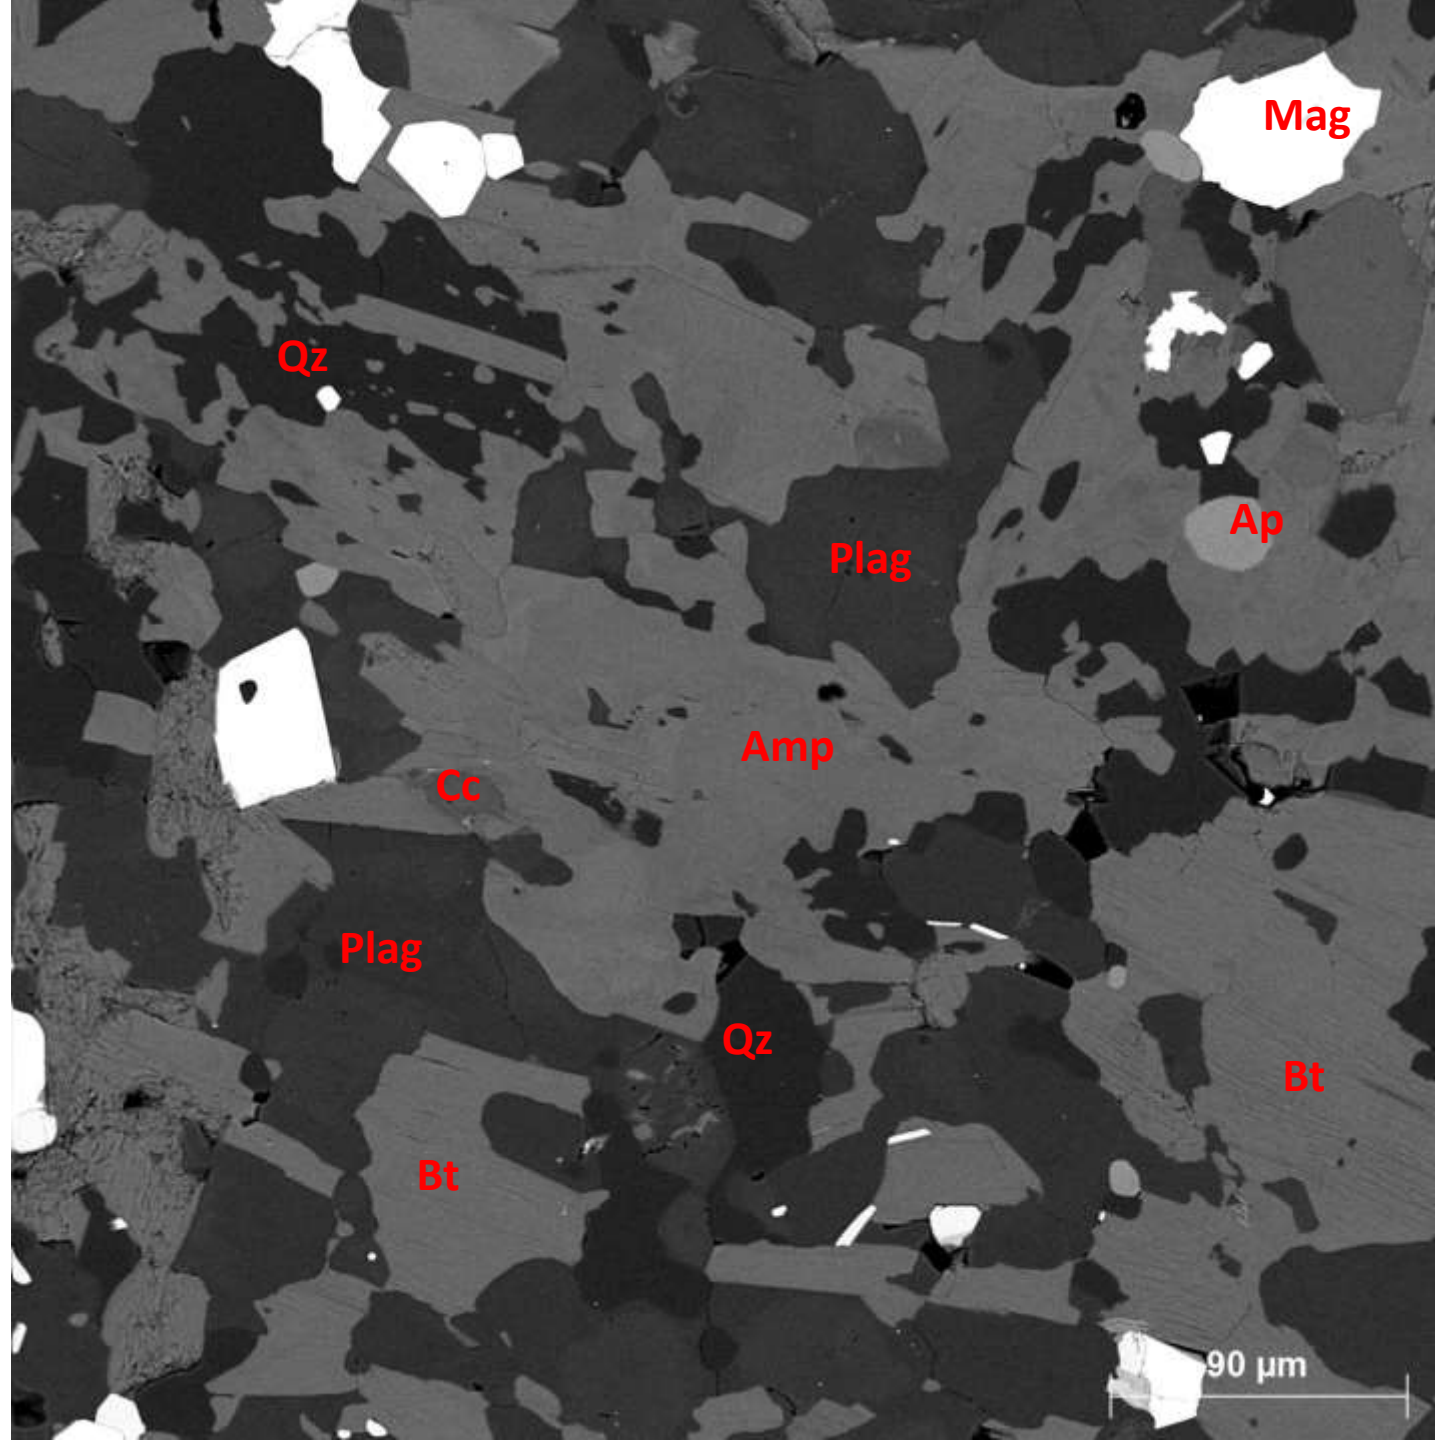



TR29

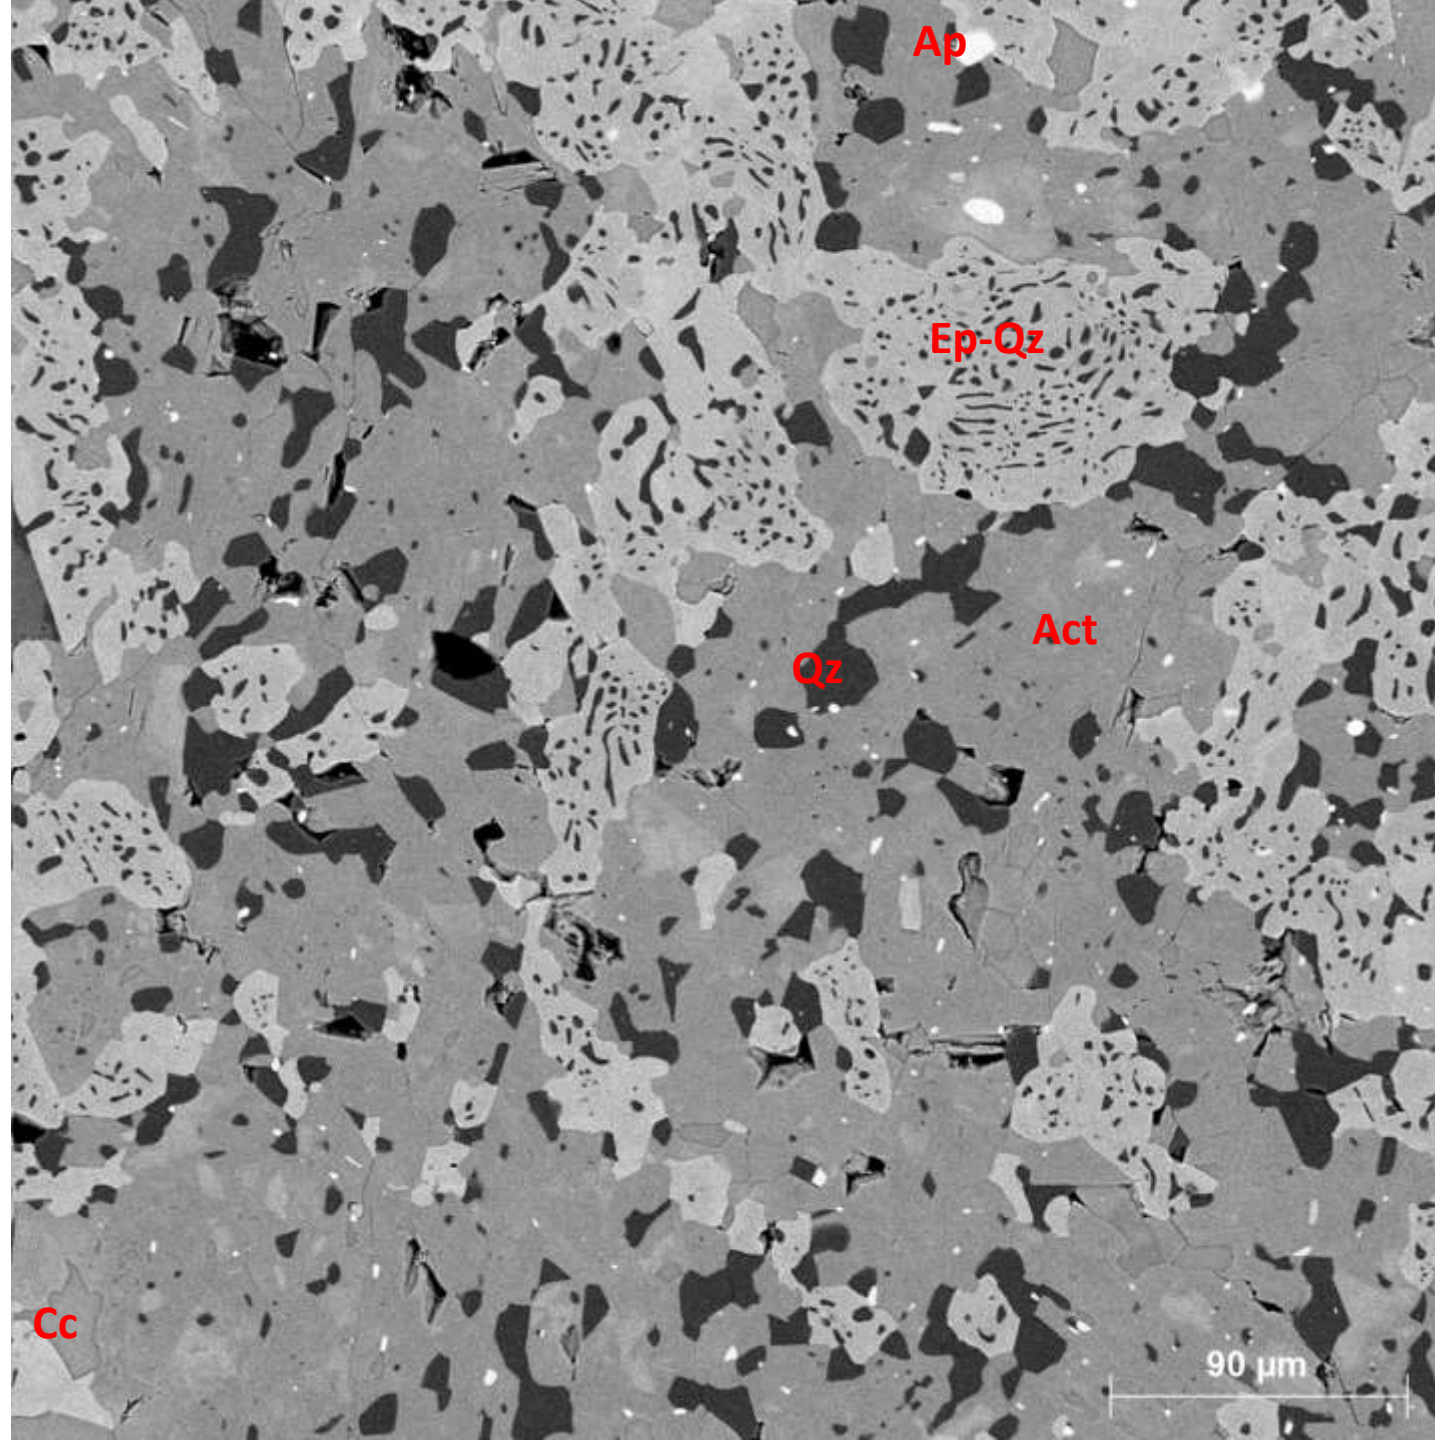

TR29

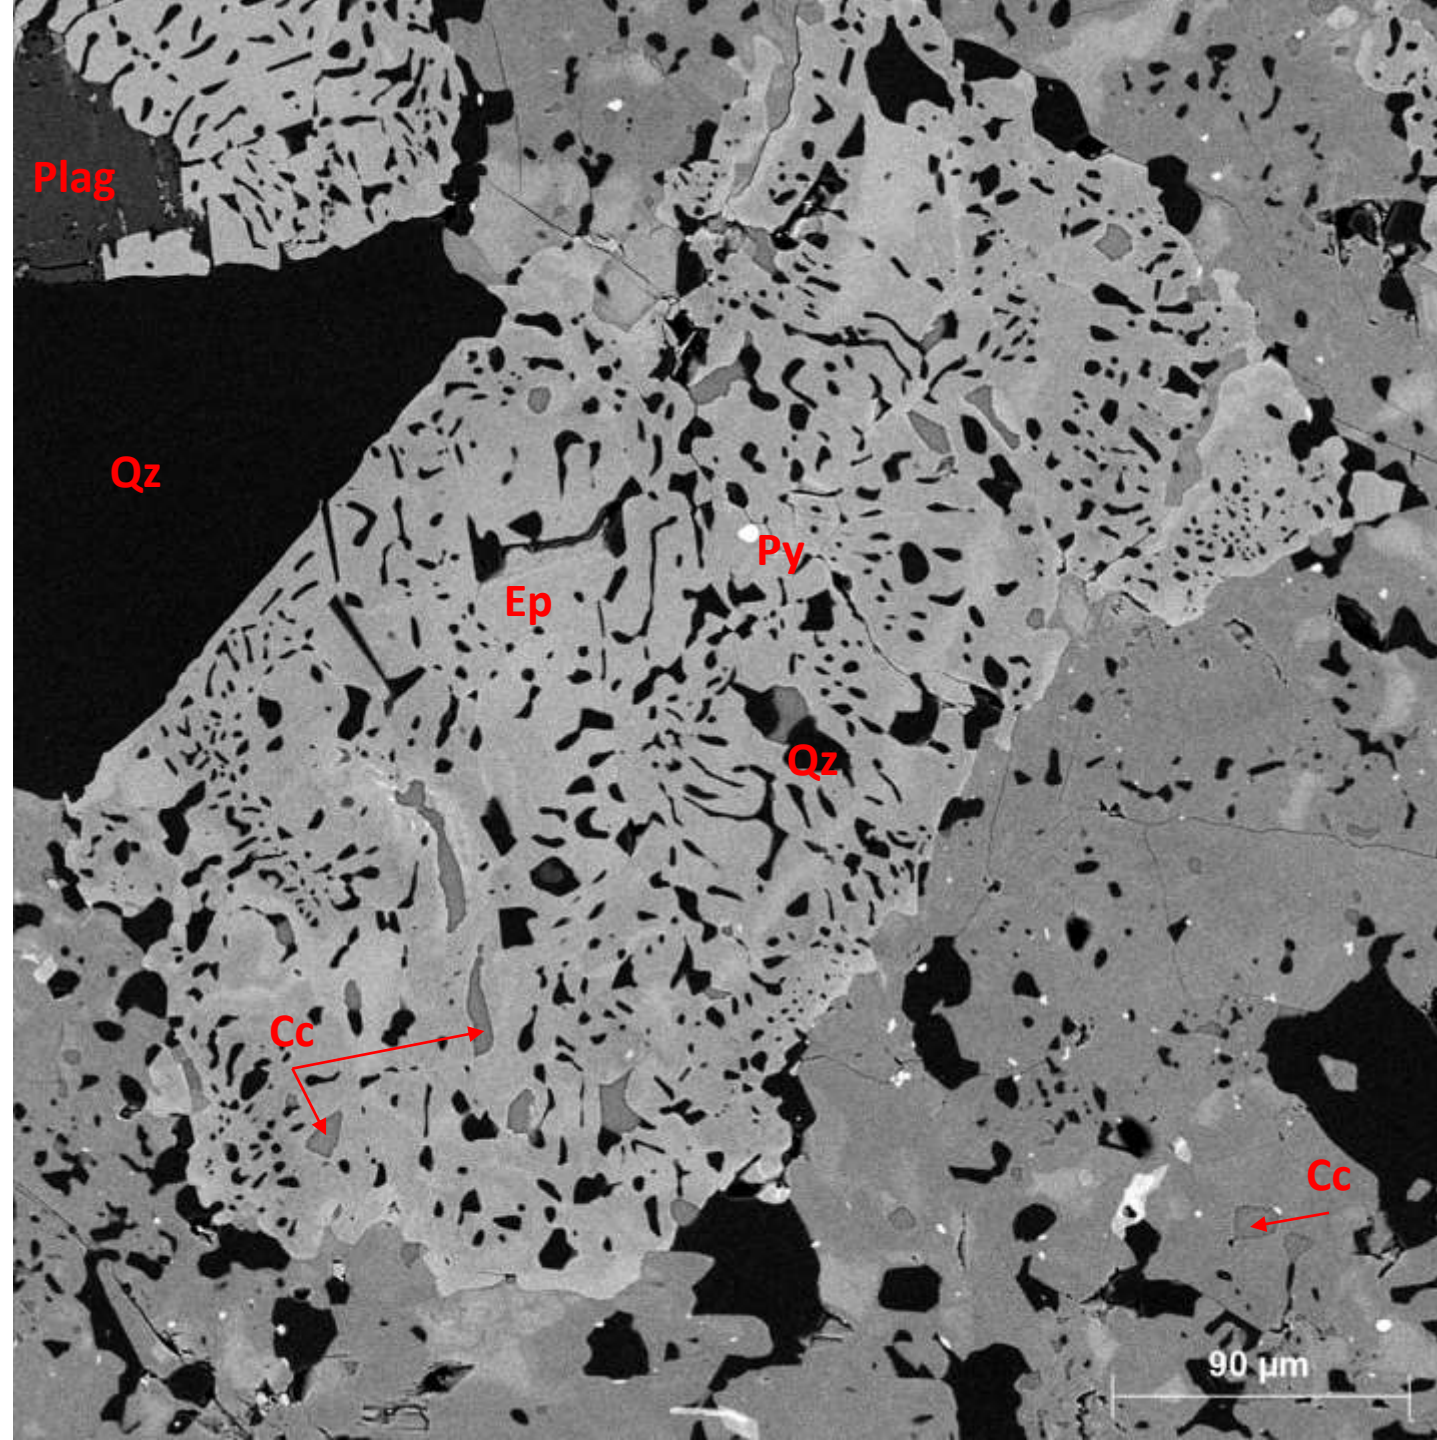



TR35

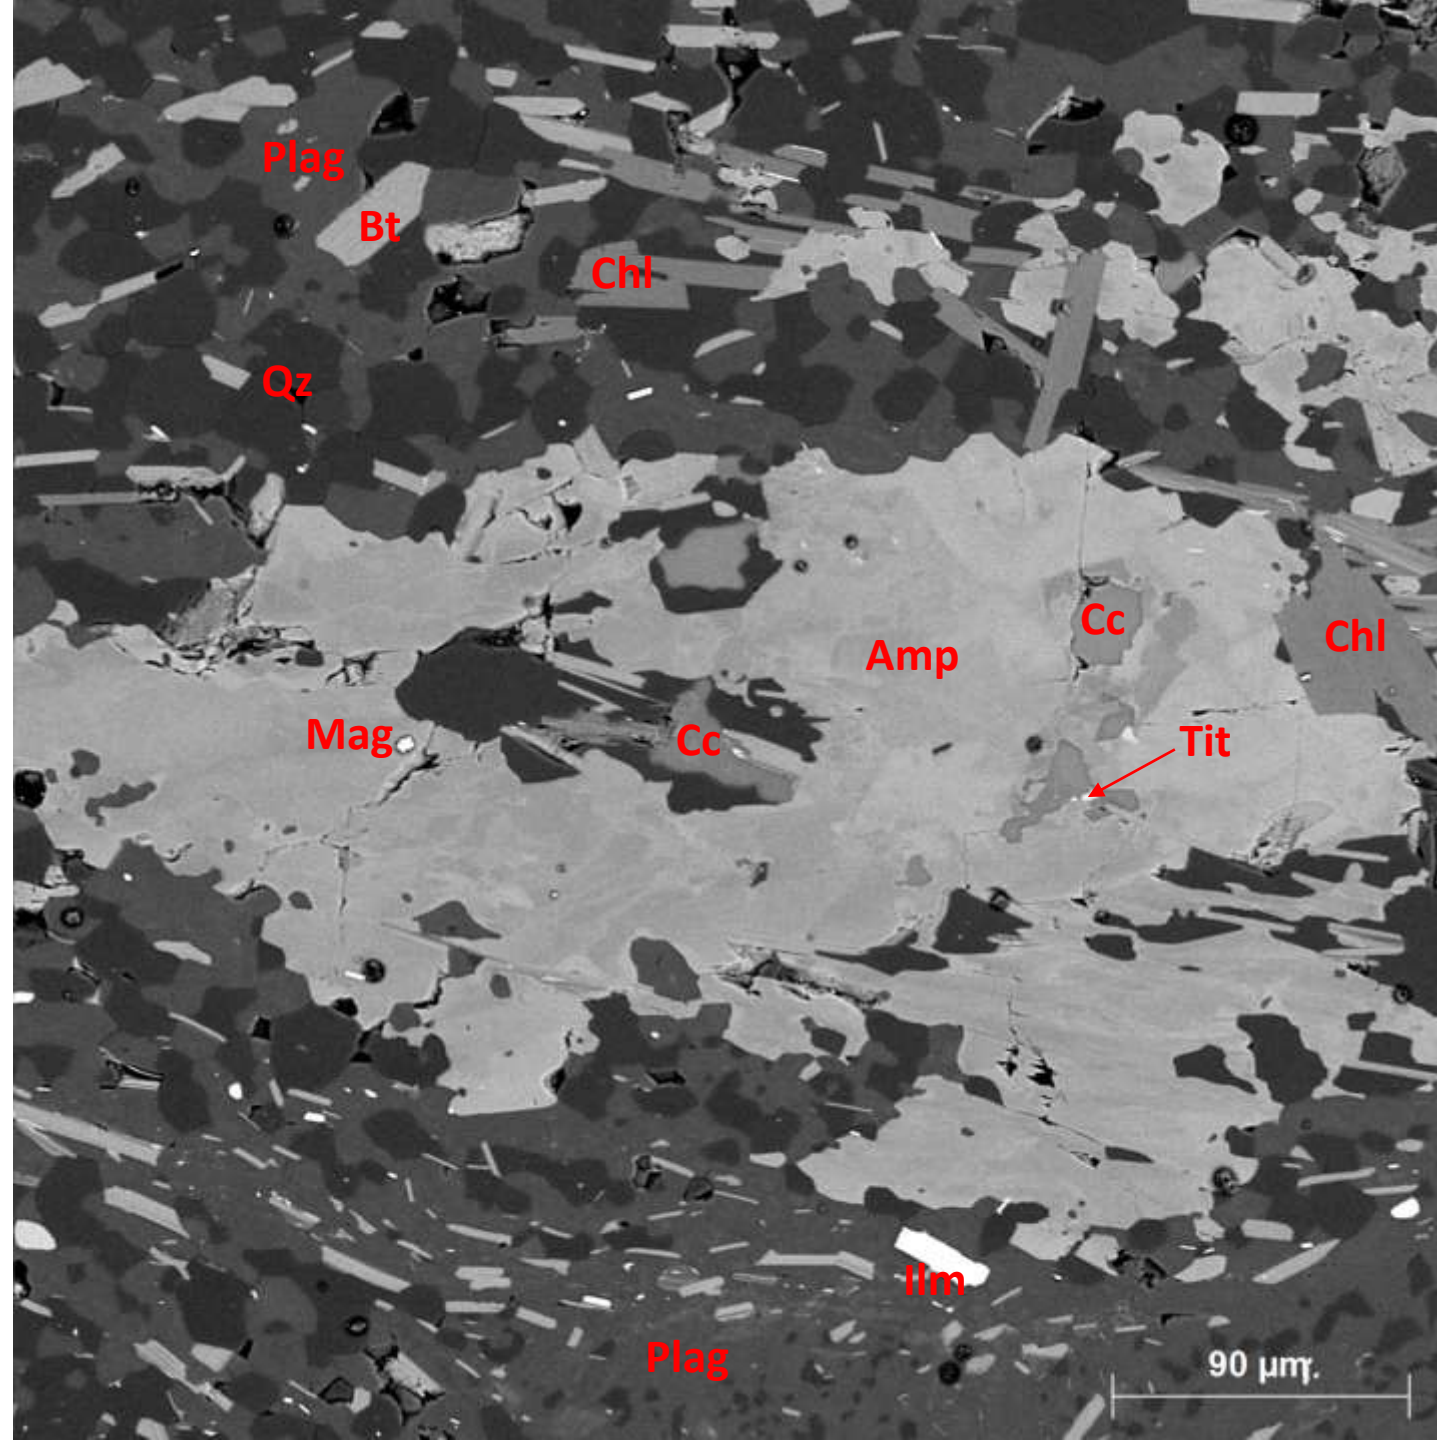

TR40

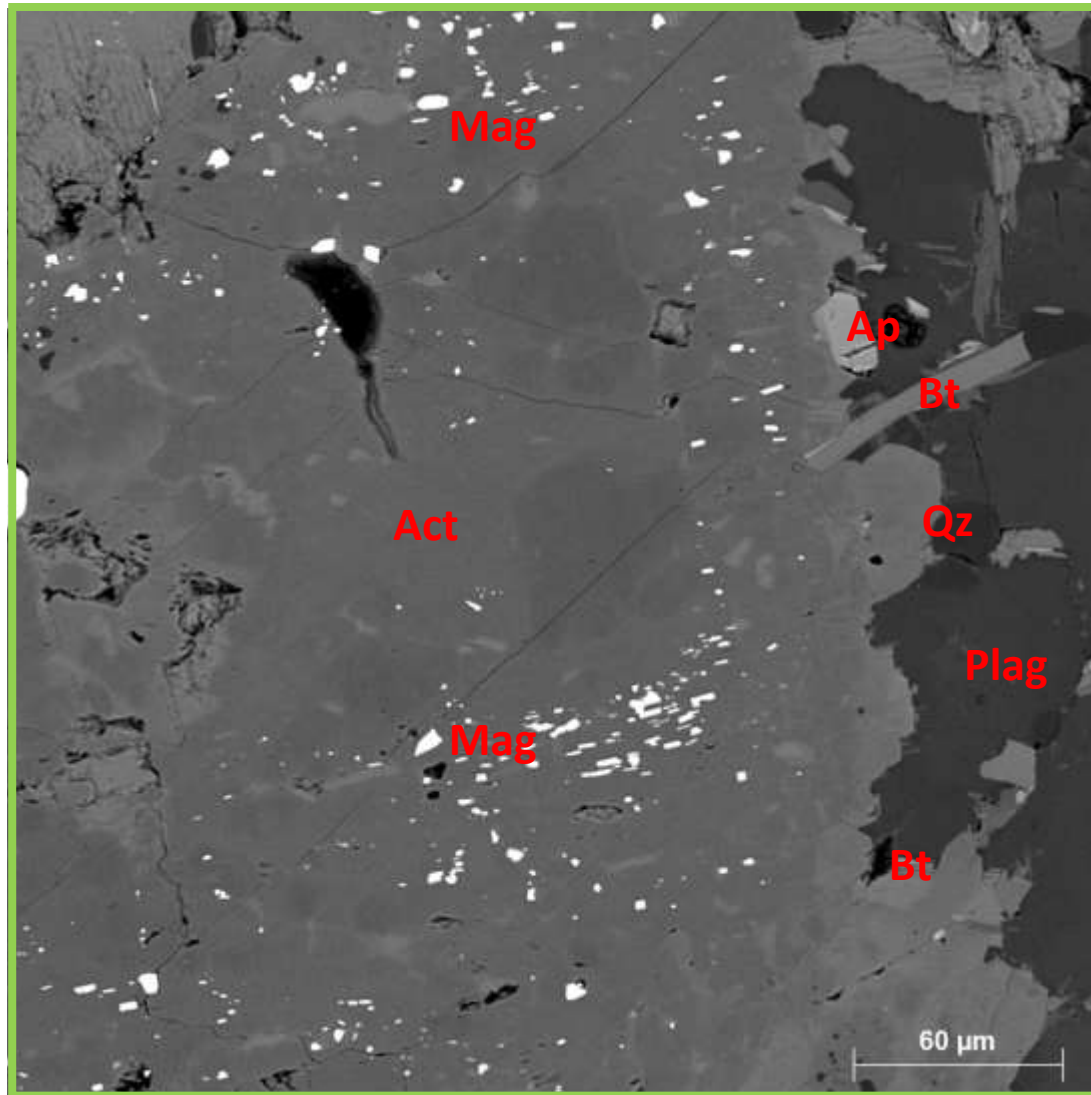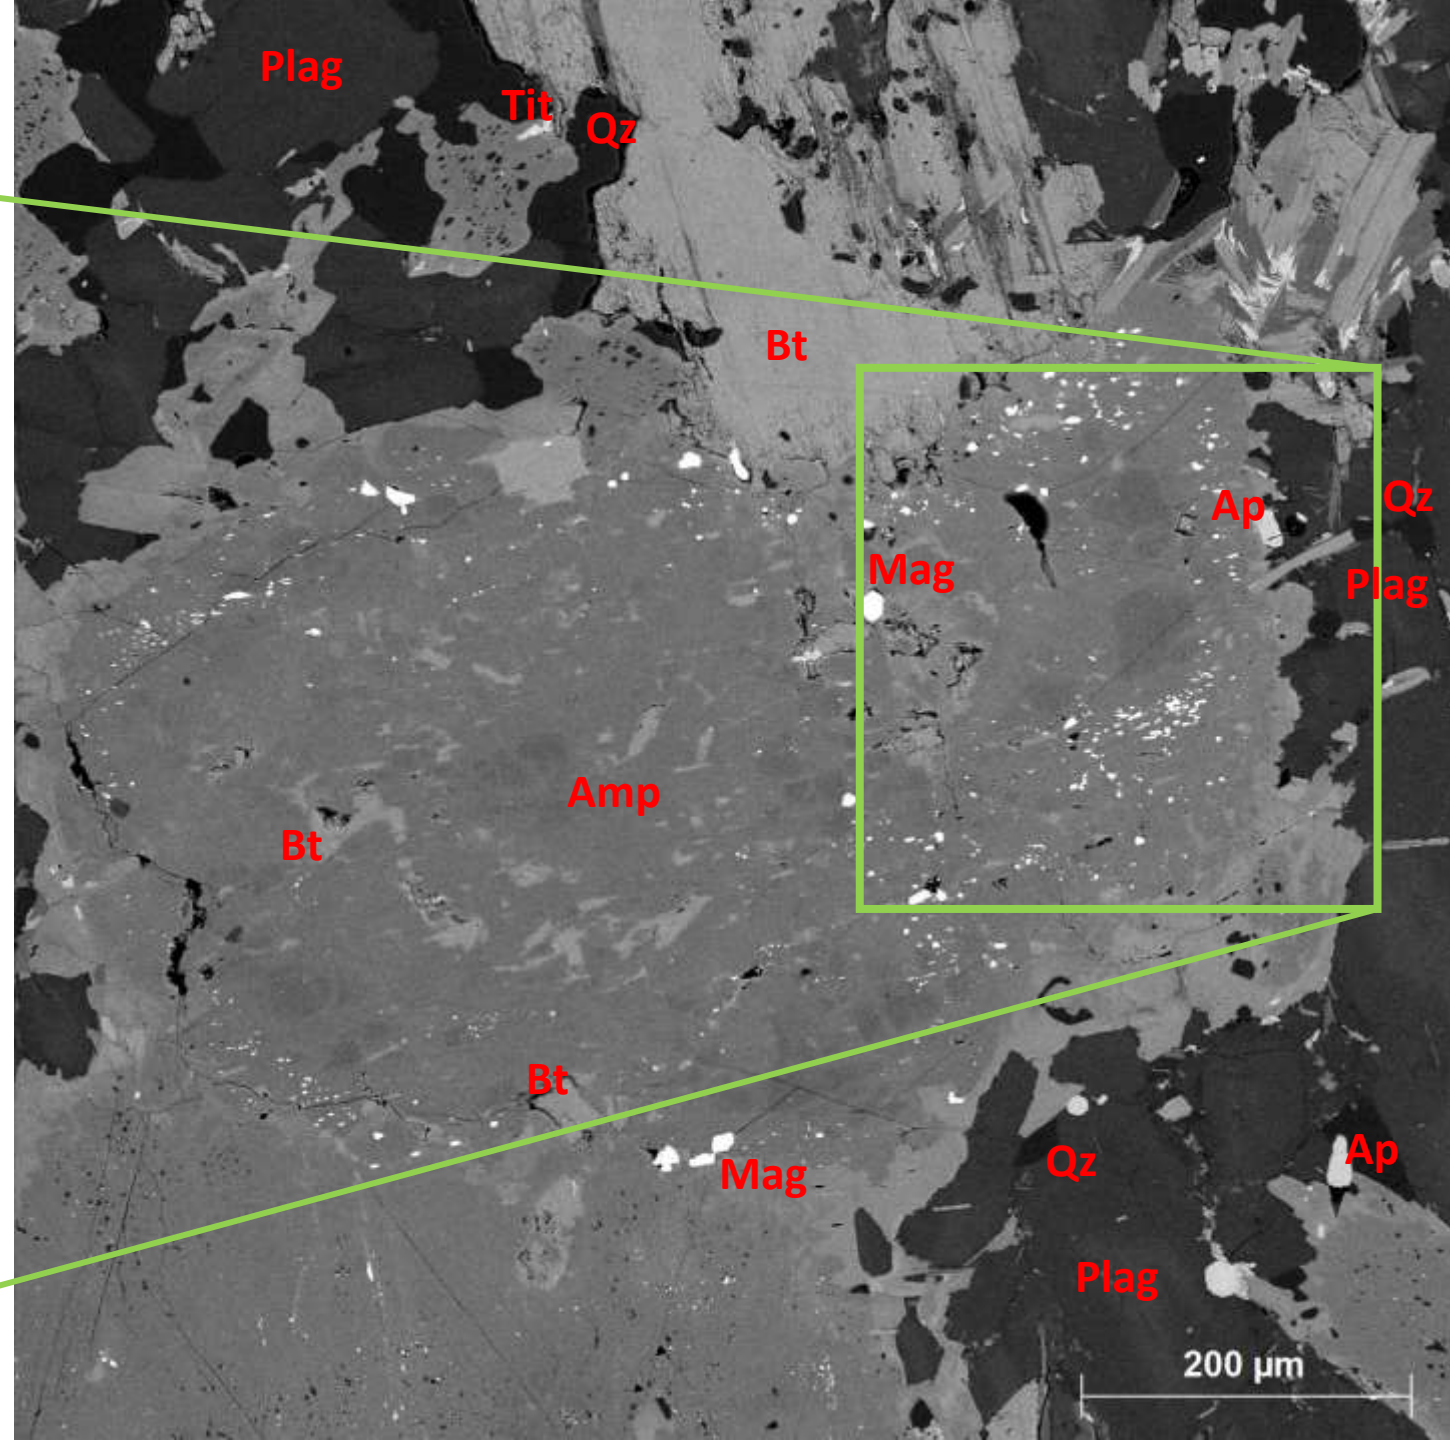



TR40

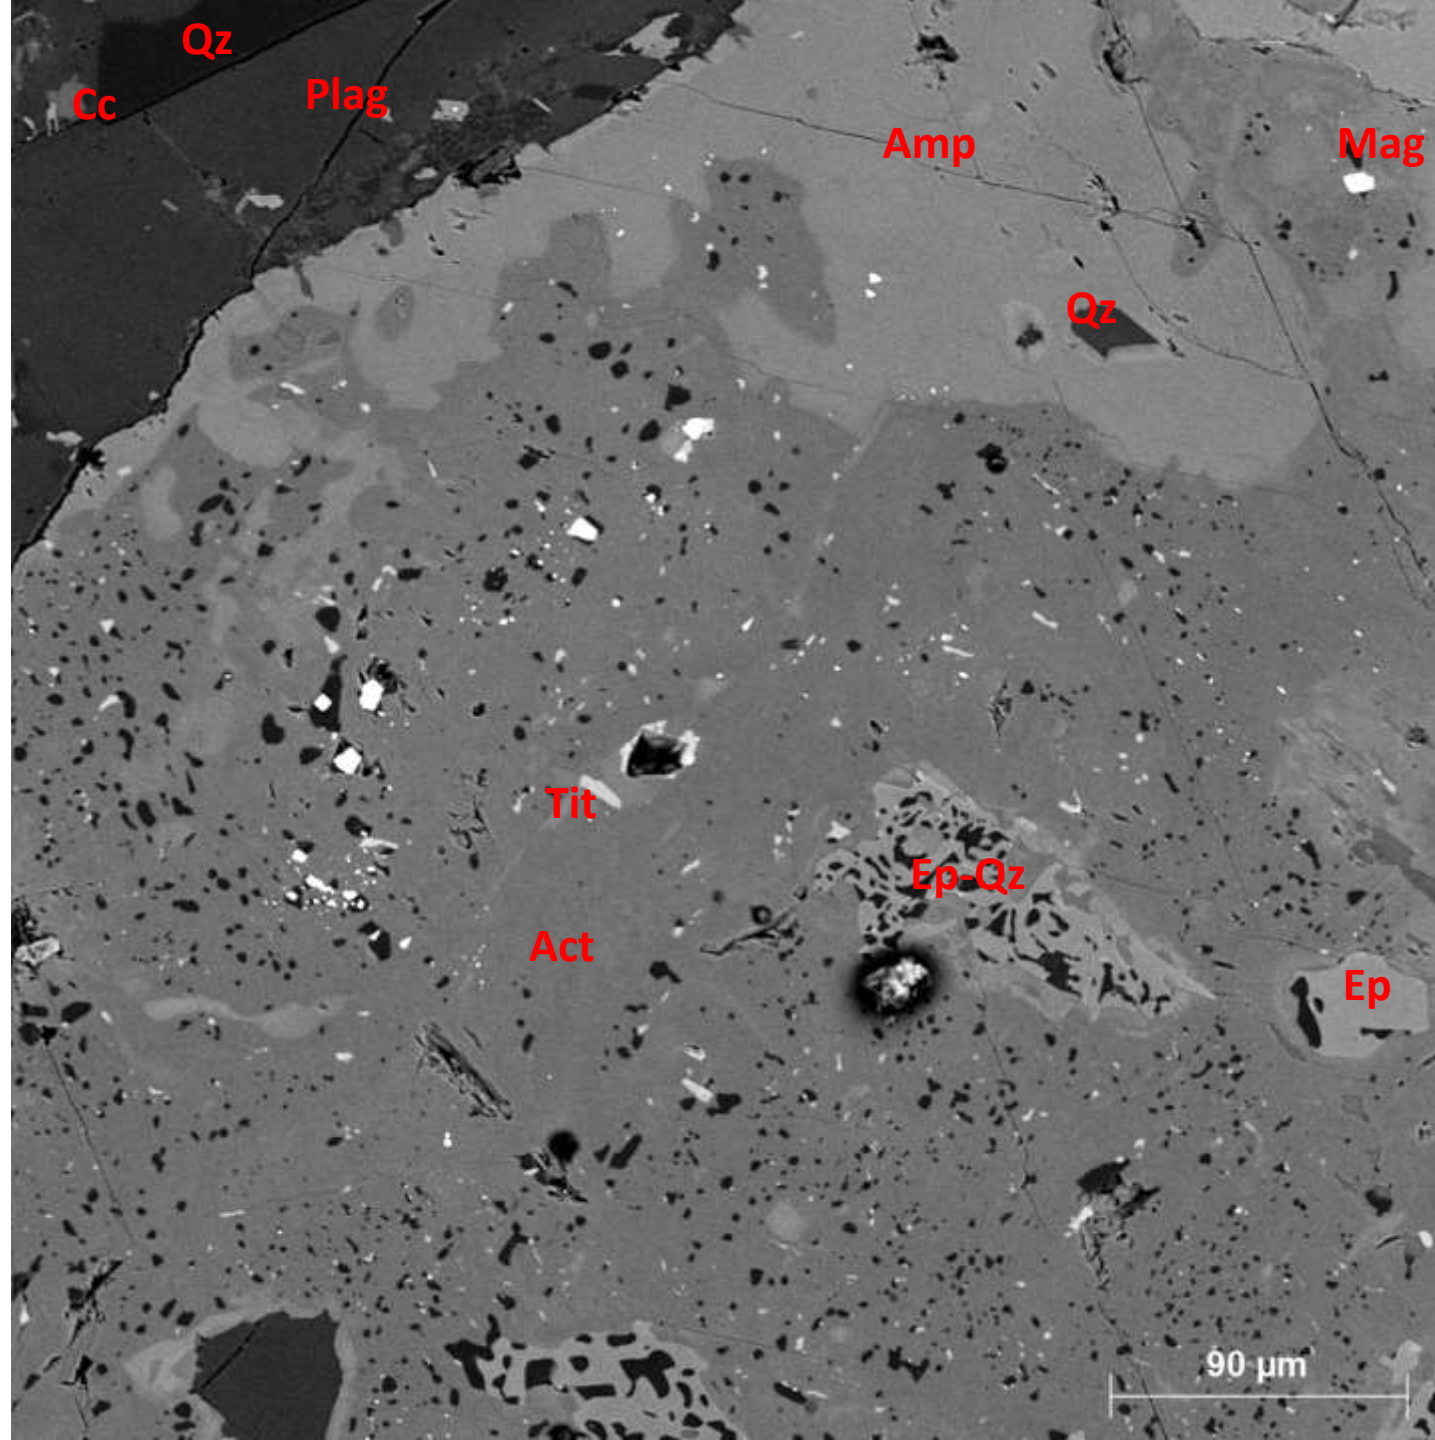

TR40

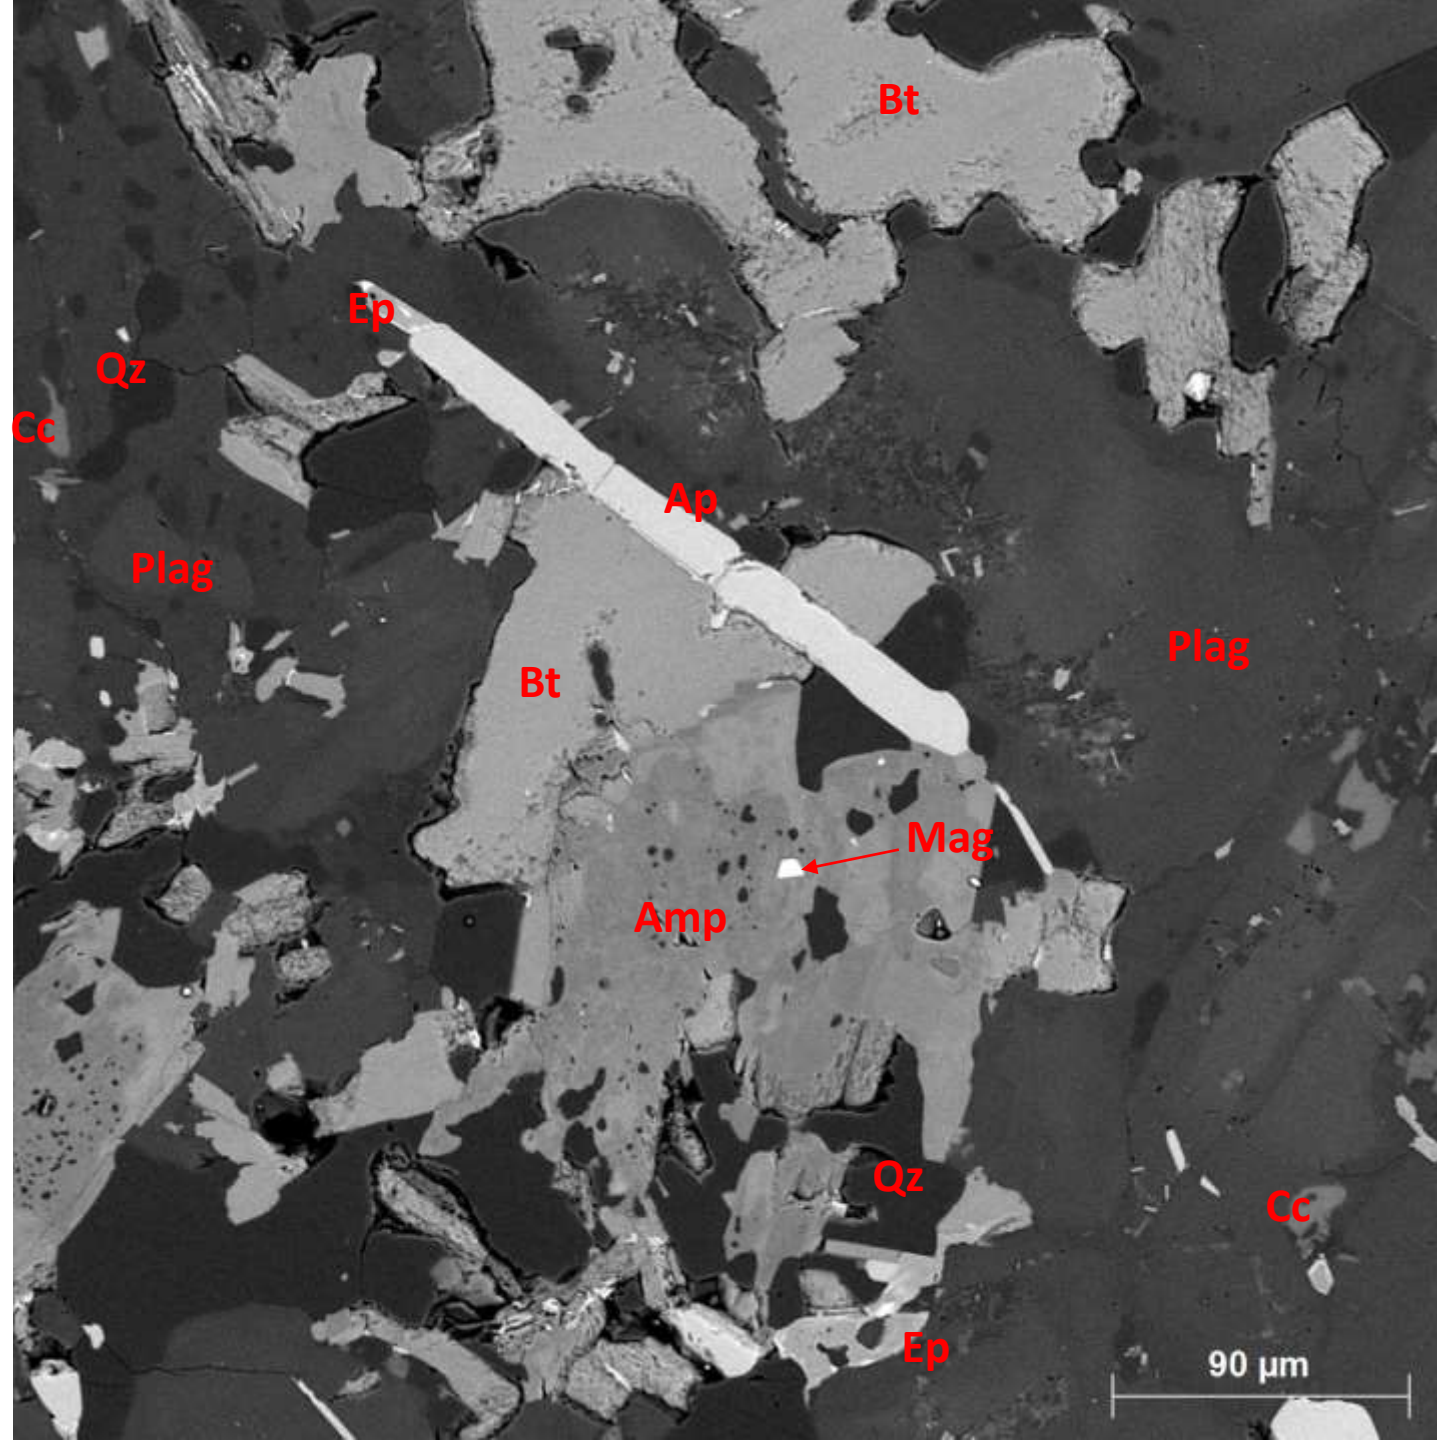



TR43

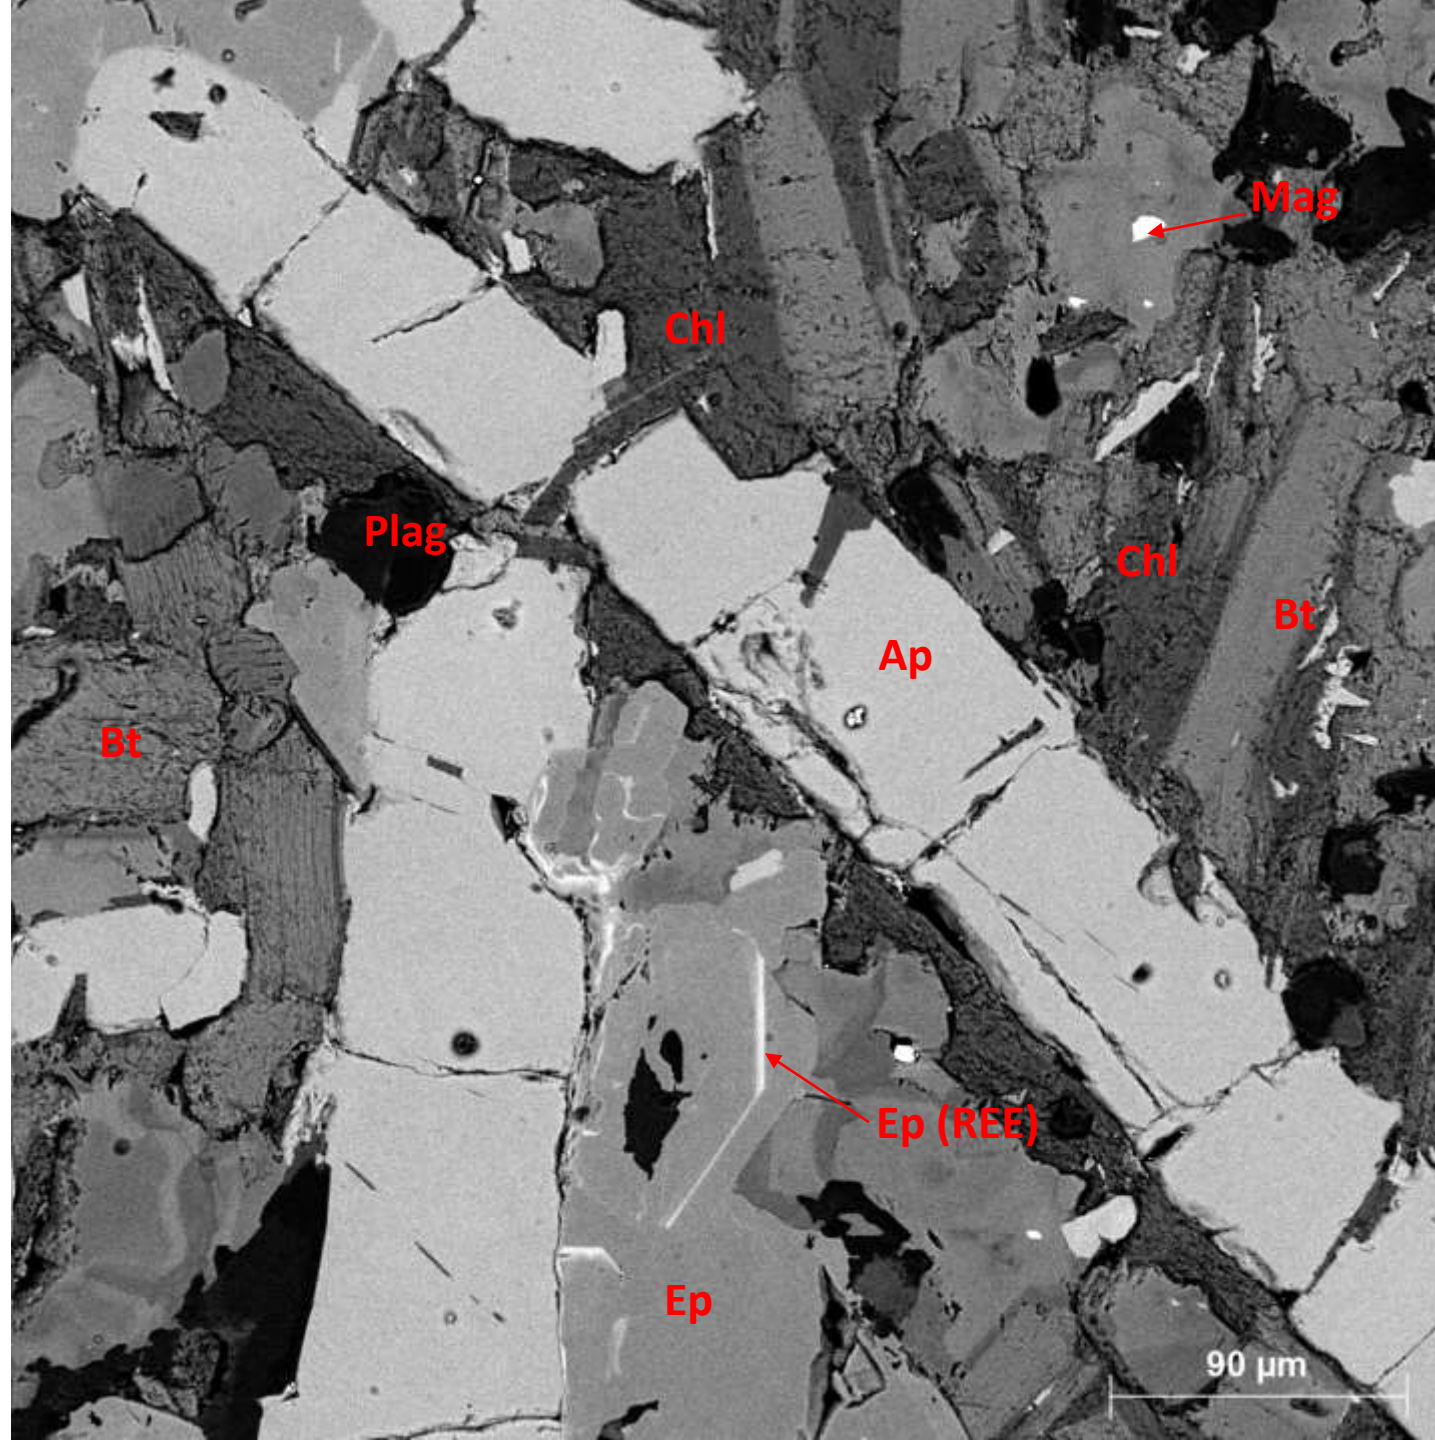

TR43

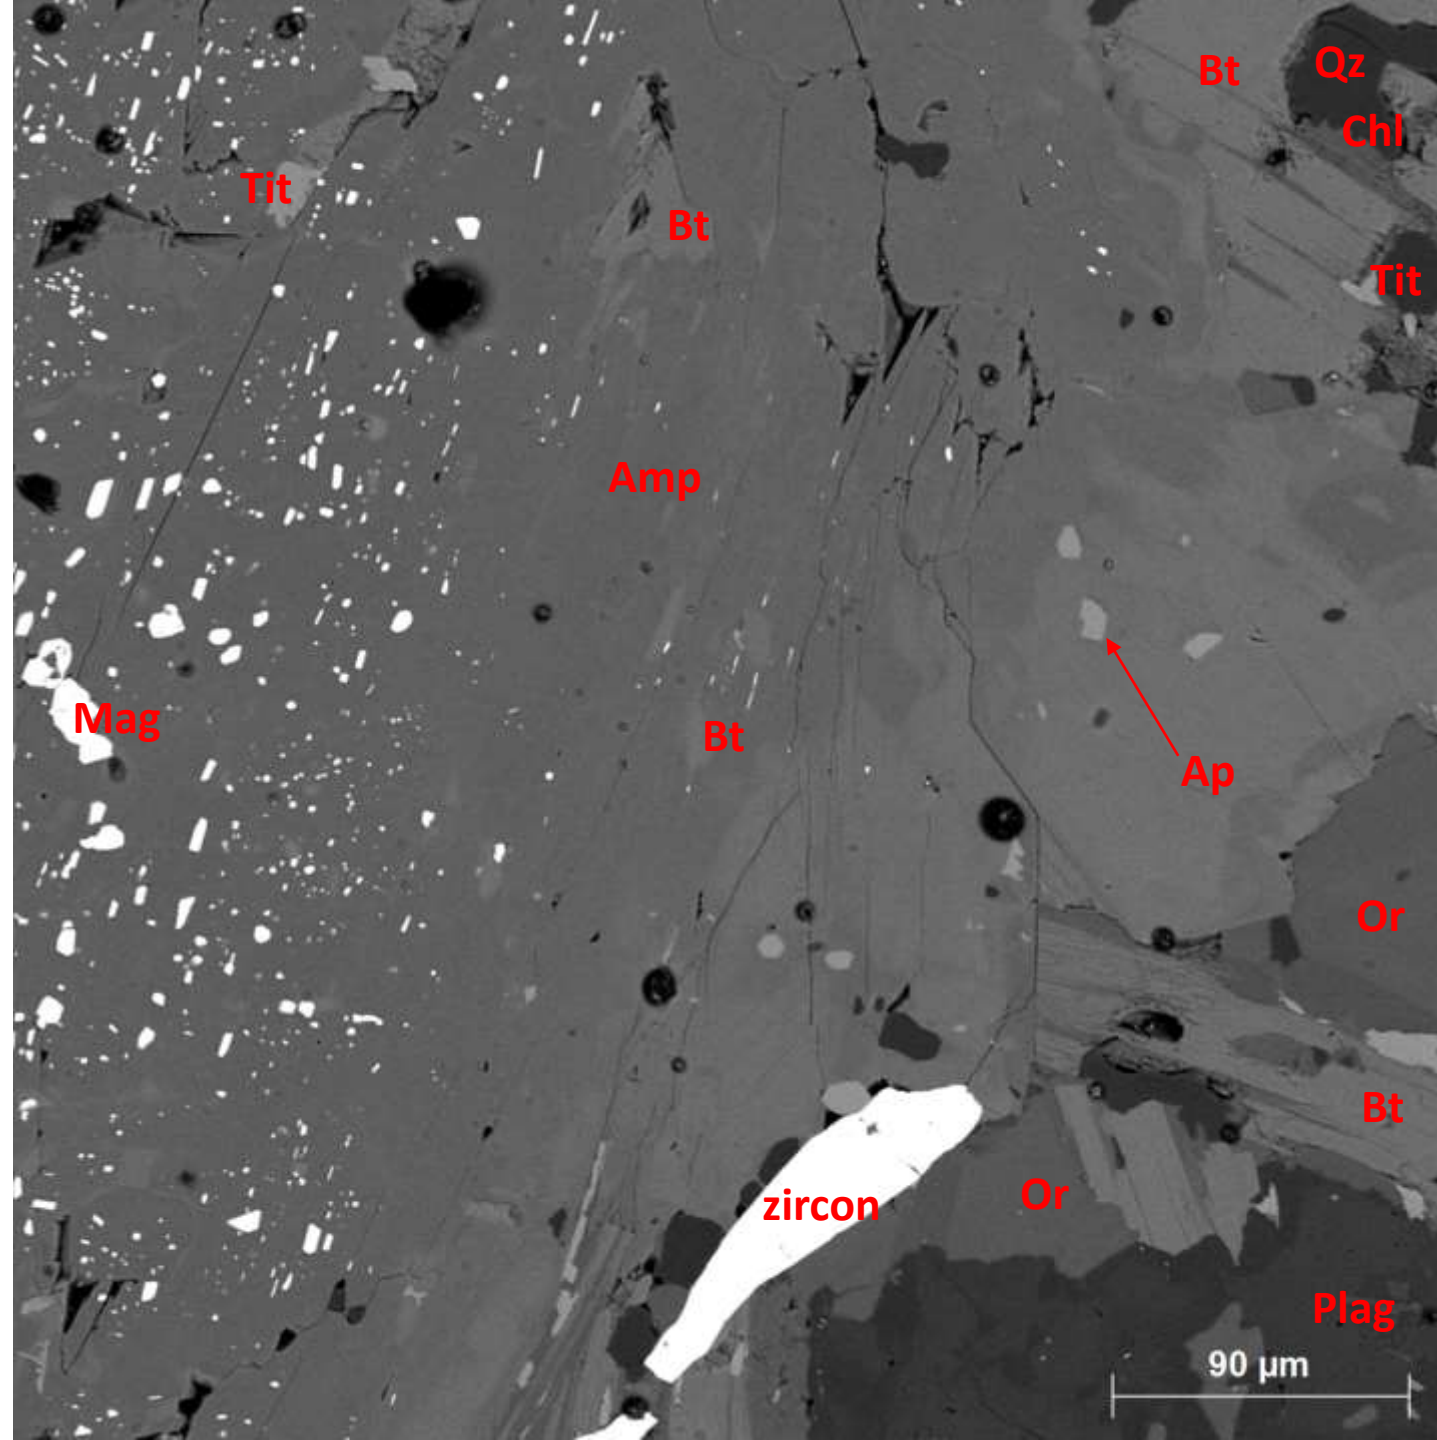



TR43

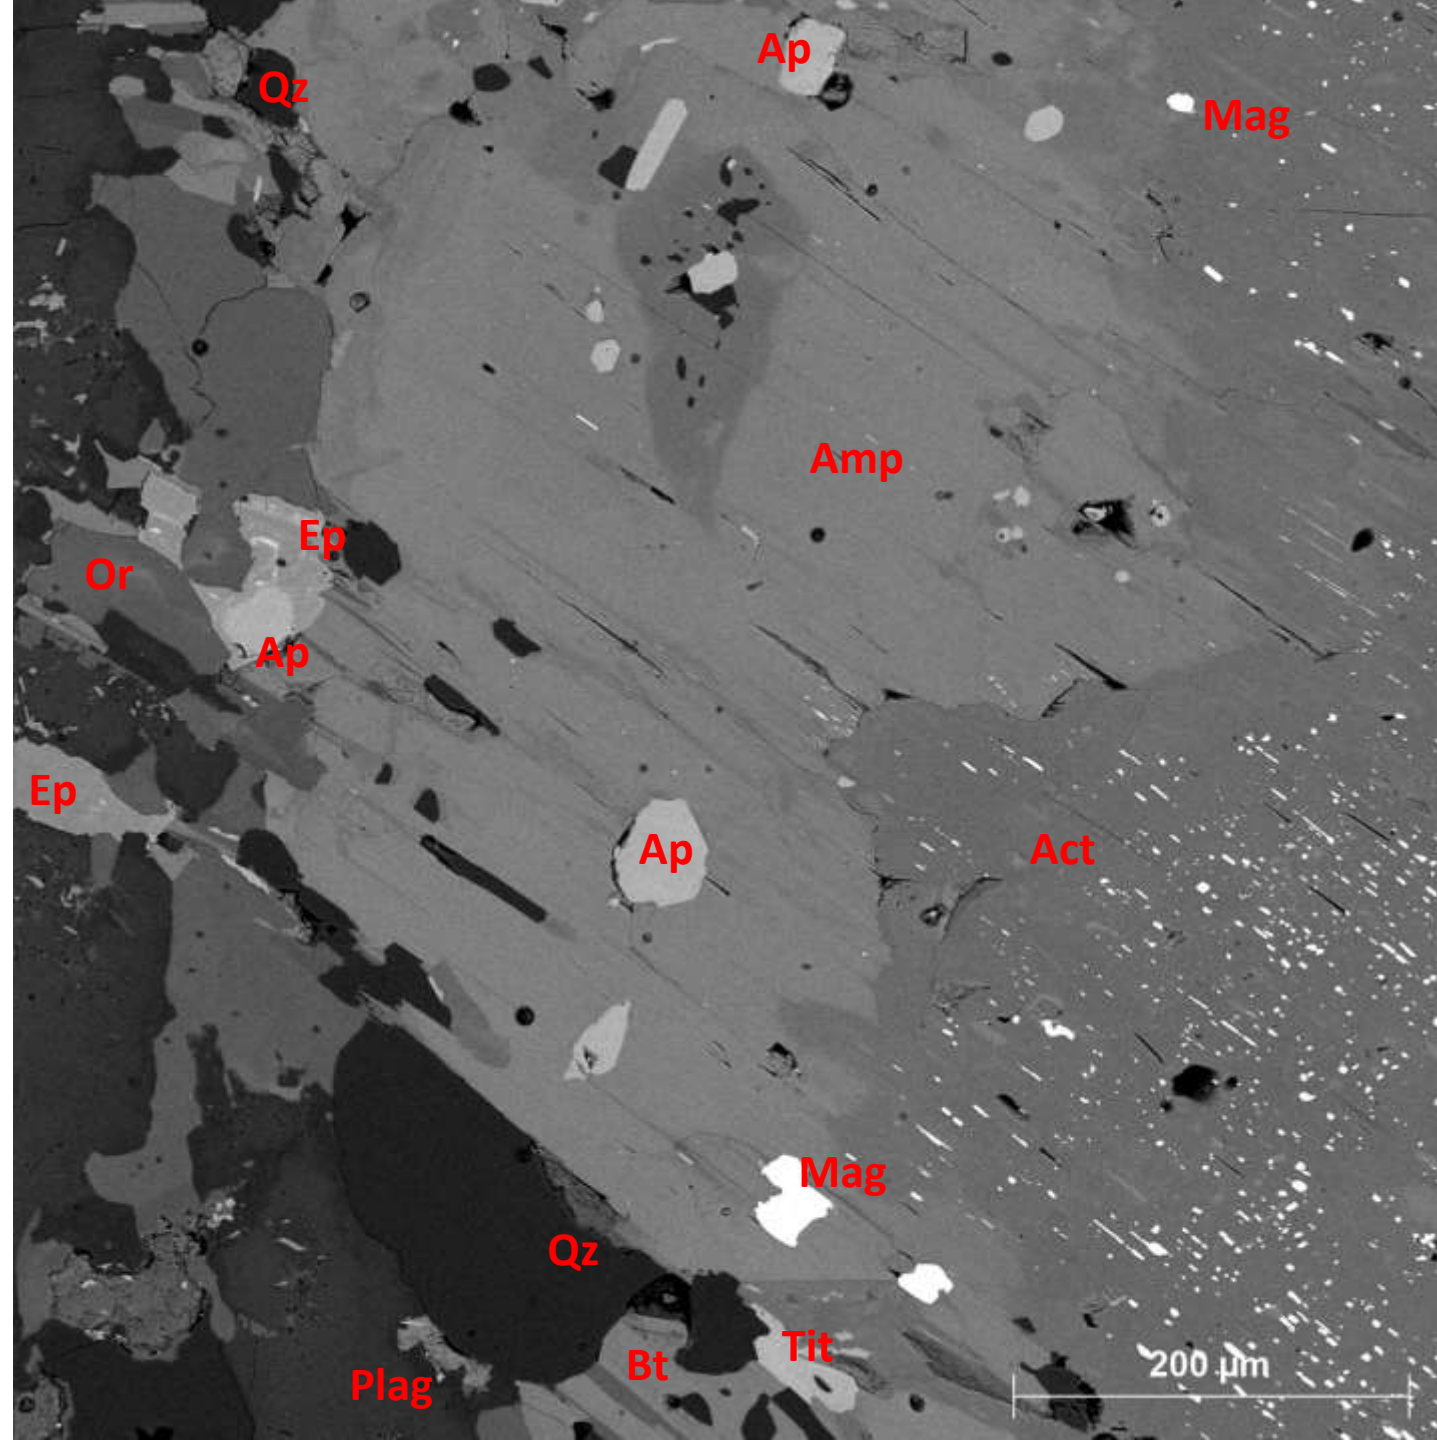

TR43

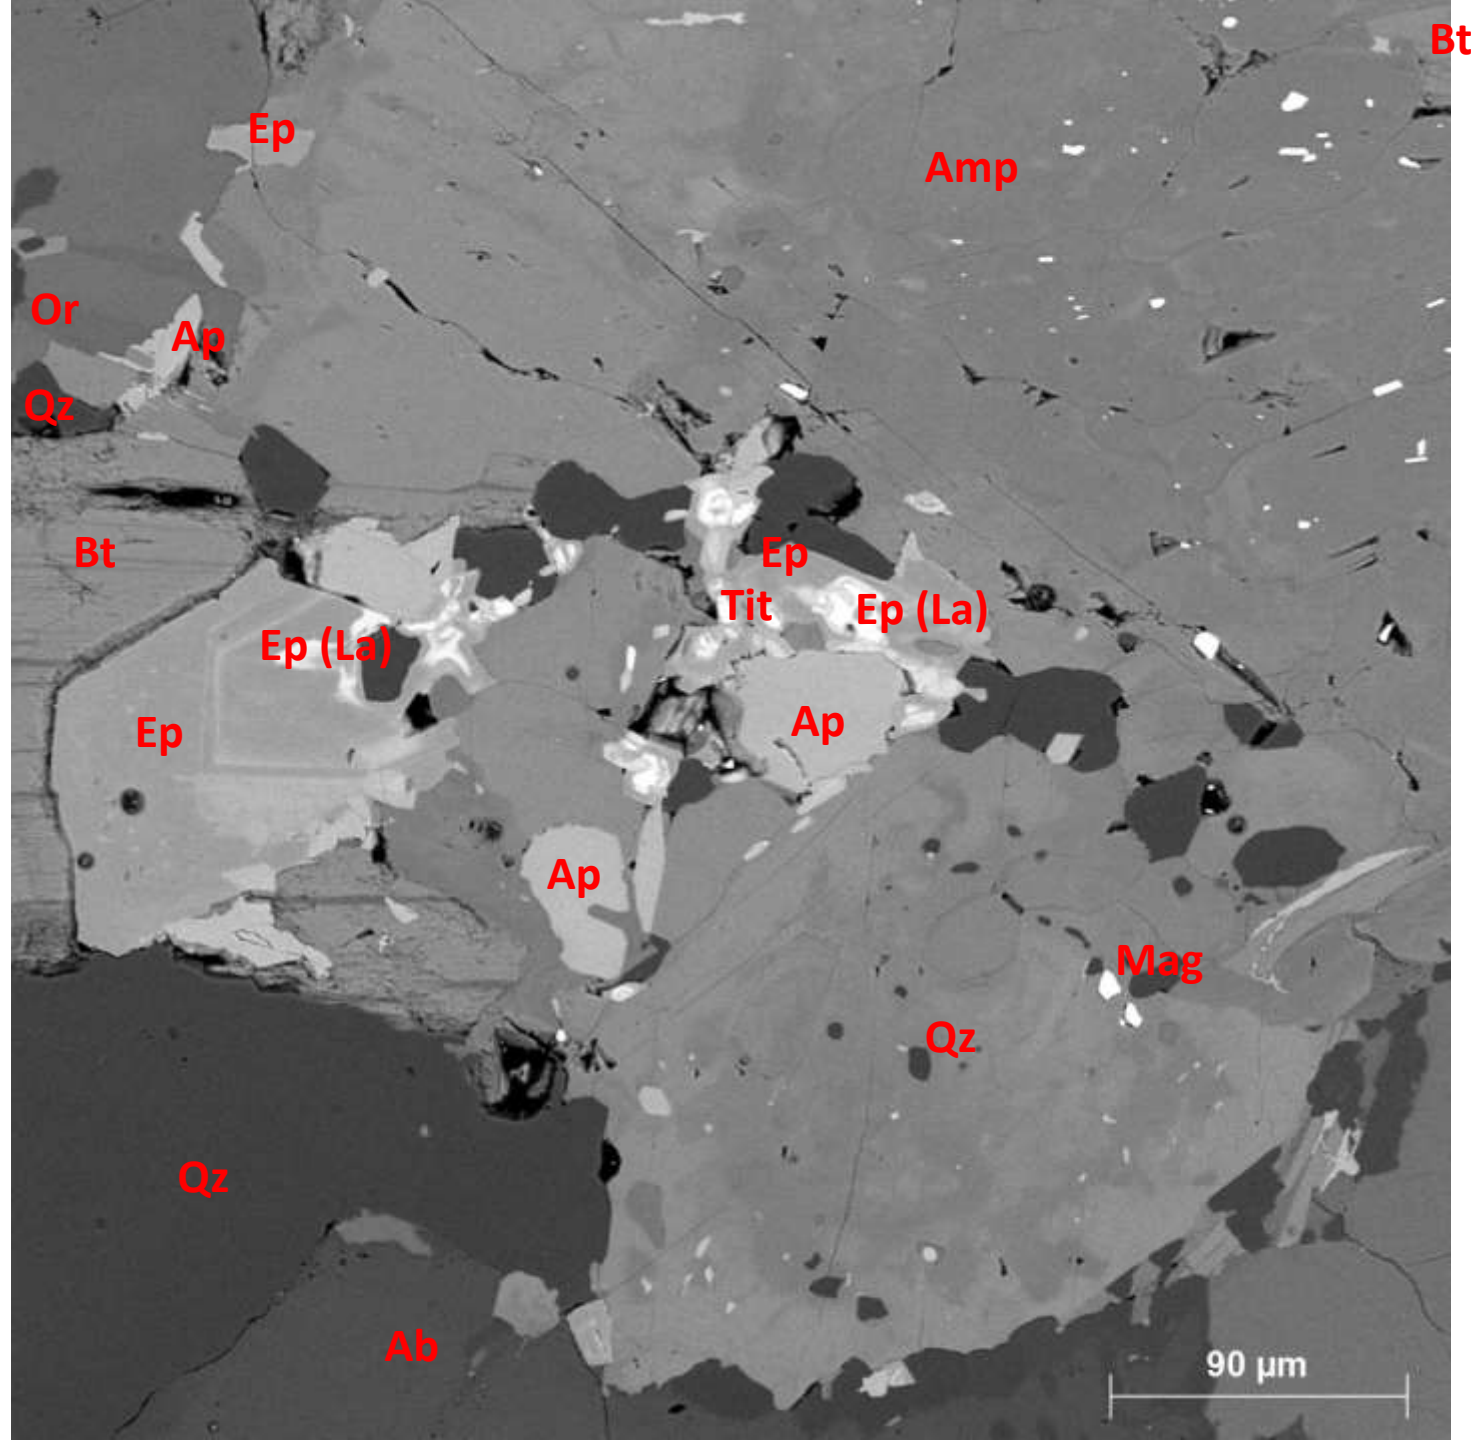



TR43

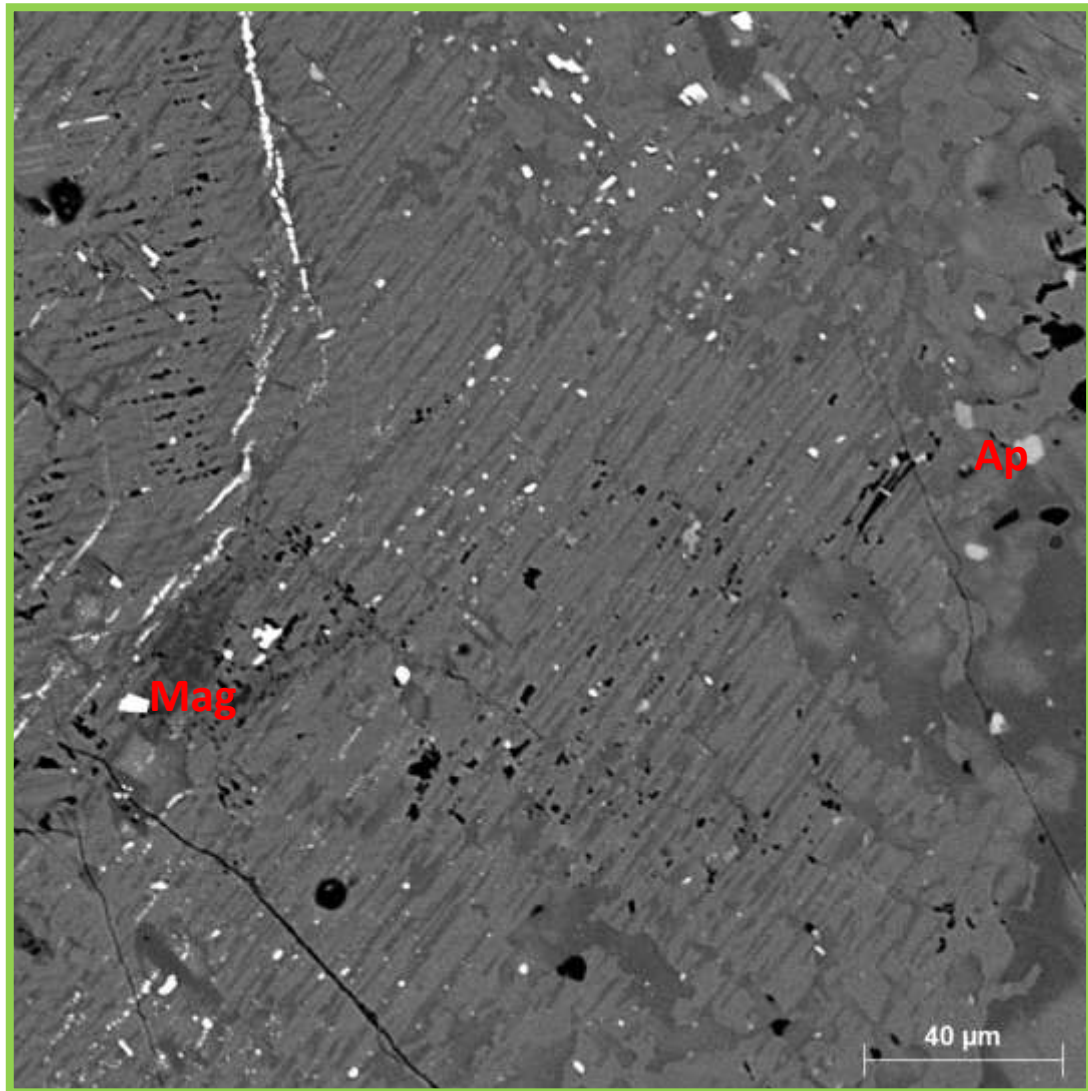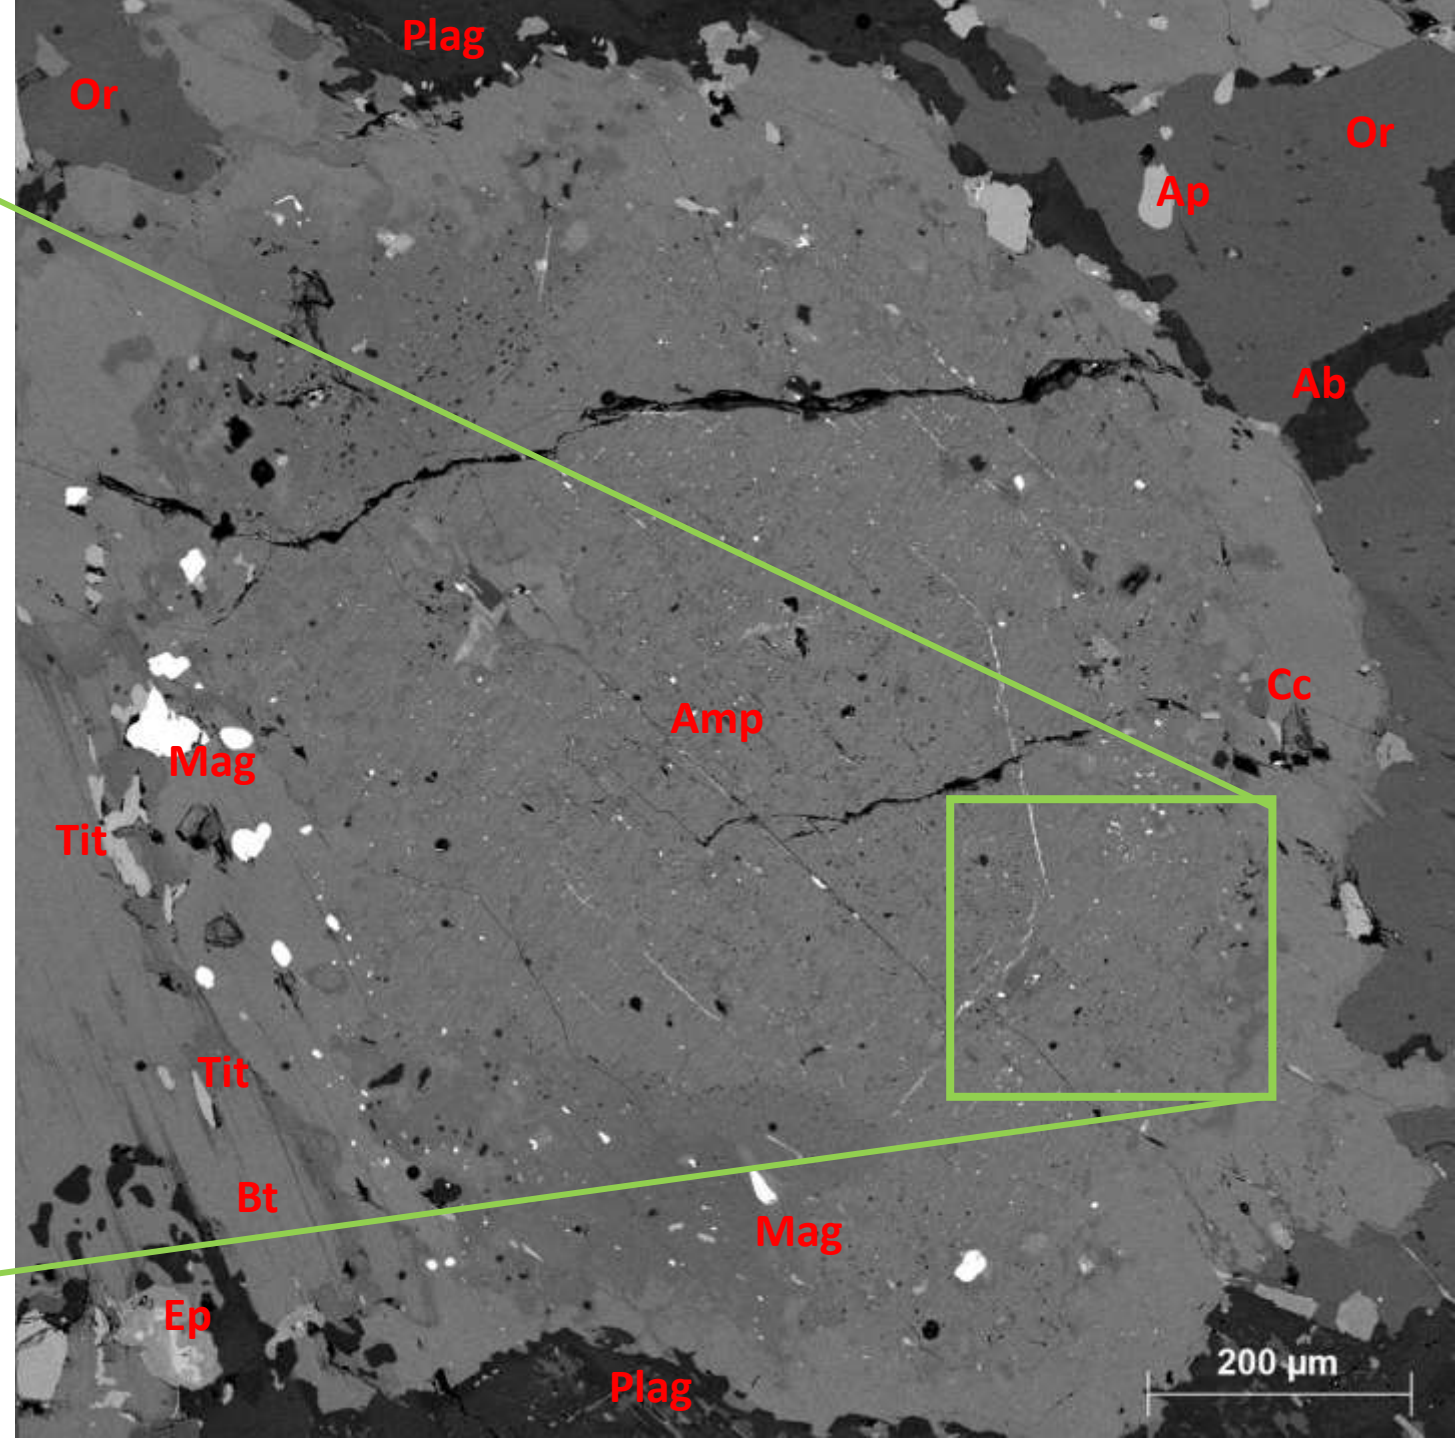

TR43

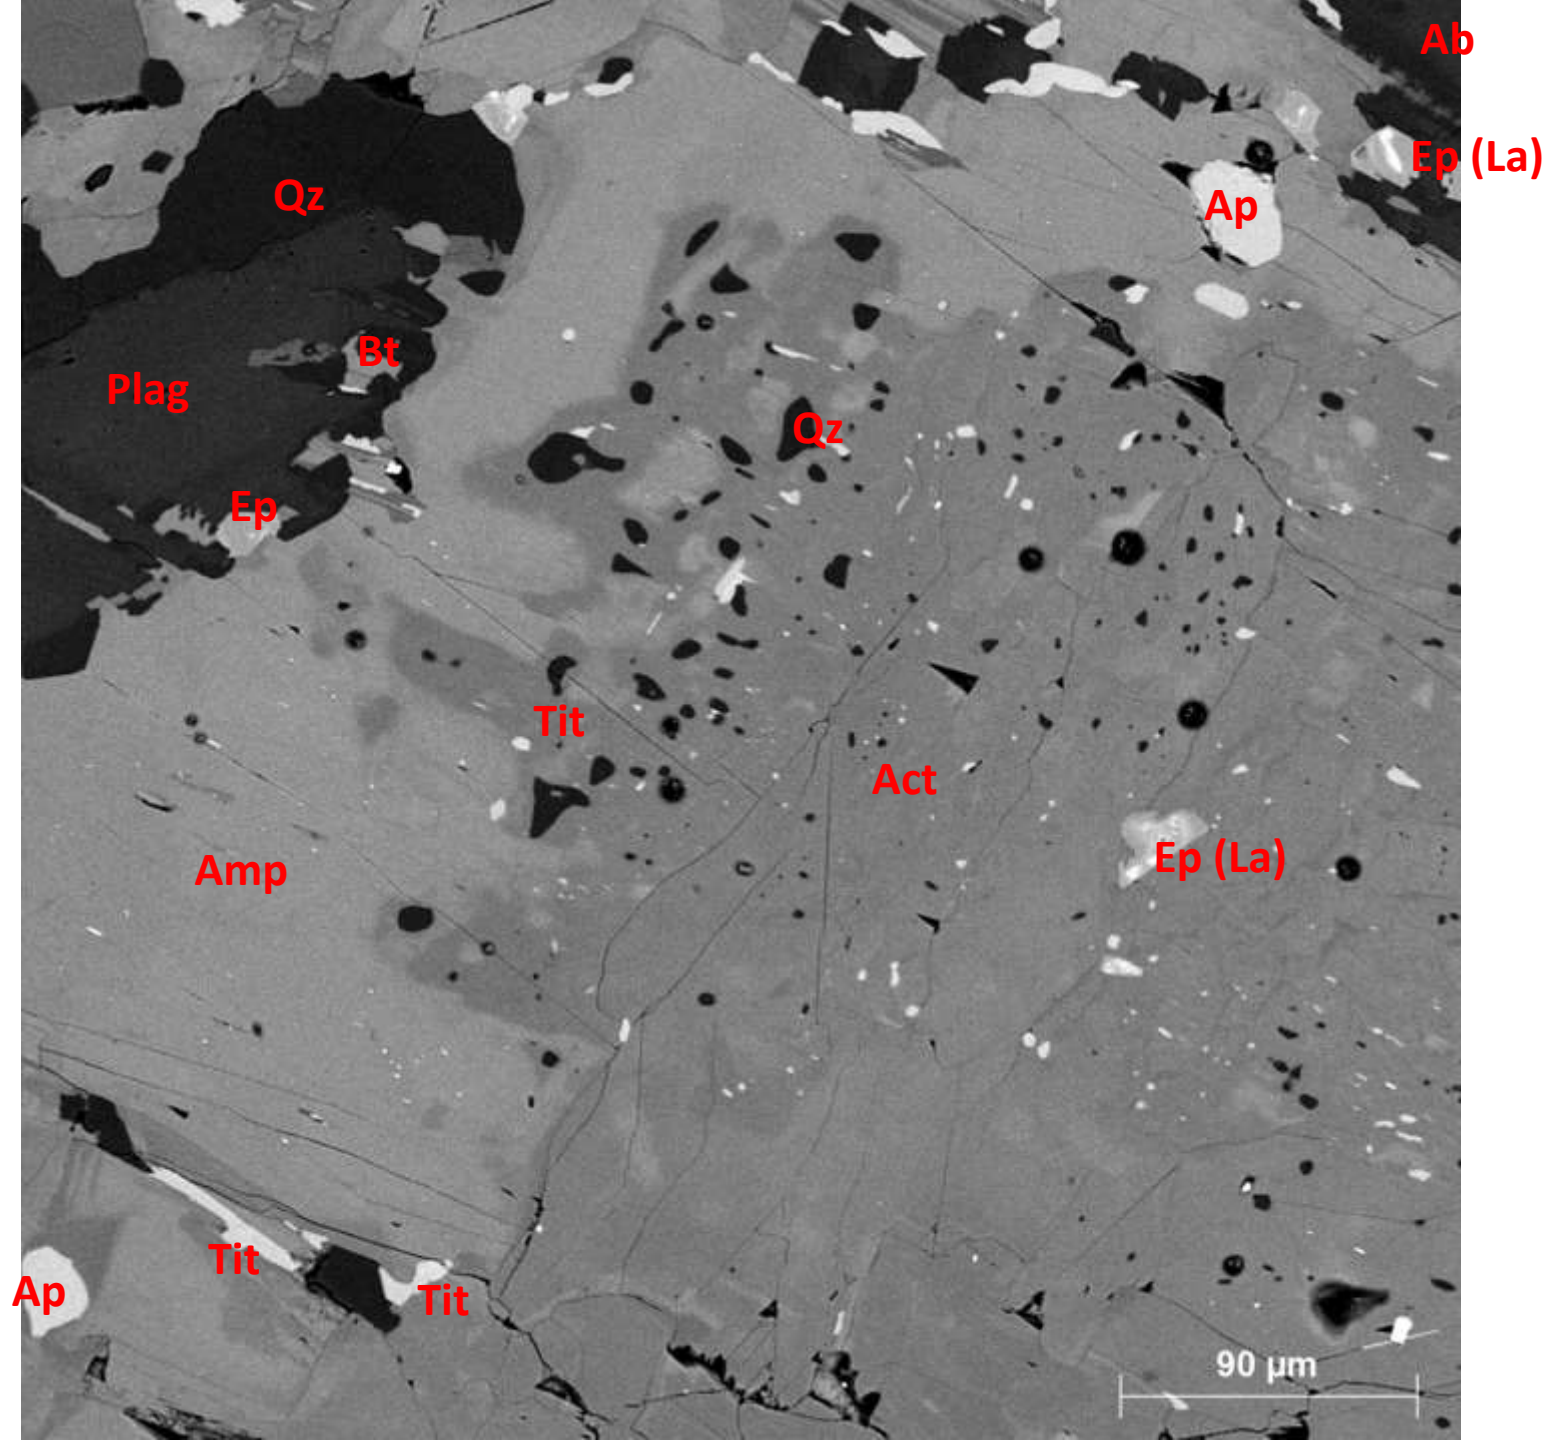

Supplement: s1 [file s1]
