# Supplementary material
Source: MDPI journal article supplement (https://www.mdpi.com/2075-163X/12/2/128)

Supplementary material S5 for the following article:

**Petrography of the intrusive rocks at the diorite-hosted Regnault Au mineralization**

**by L. Mathieu, F. MacDonald**

Journal: MDPI – Minerals

**Information.** Diorite and other samples observed in cathodoluminescence. This document contains images that complete Figure 5.

TR06 – phase 1a

K-feldspar

Carbonate

Apatite

Amphibole

Euhedral  
plagioclase

1 mm

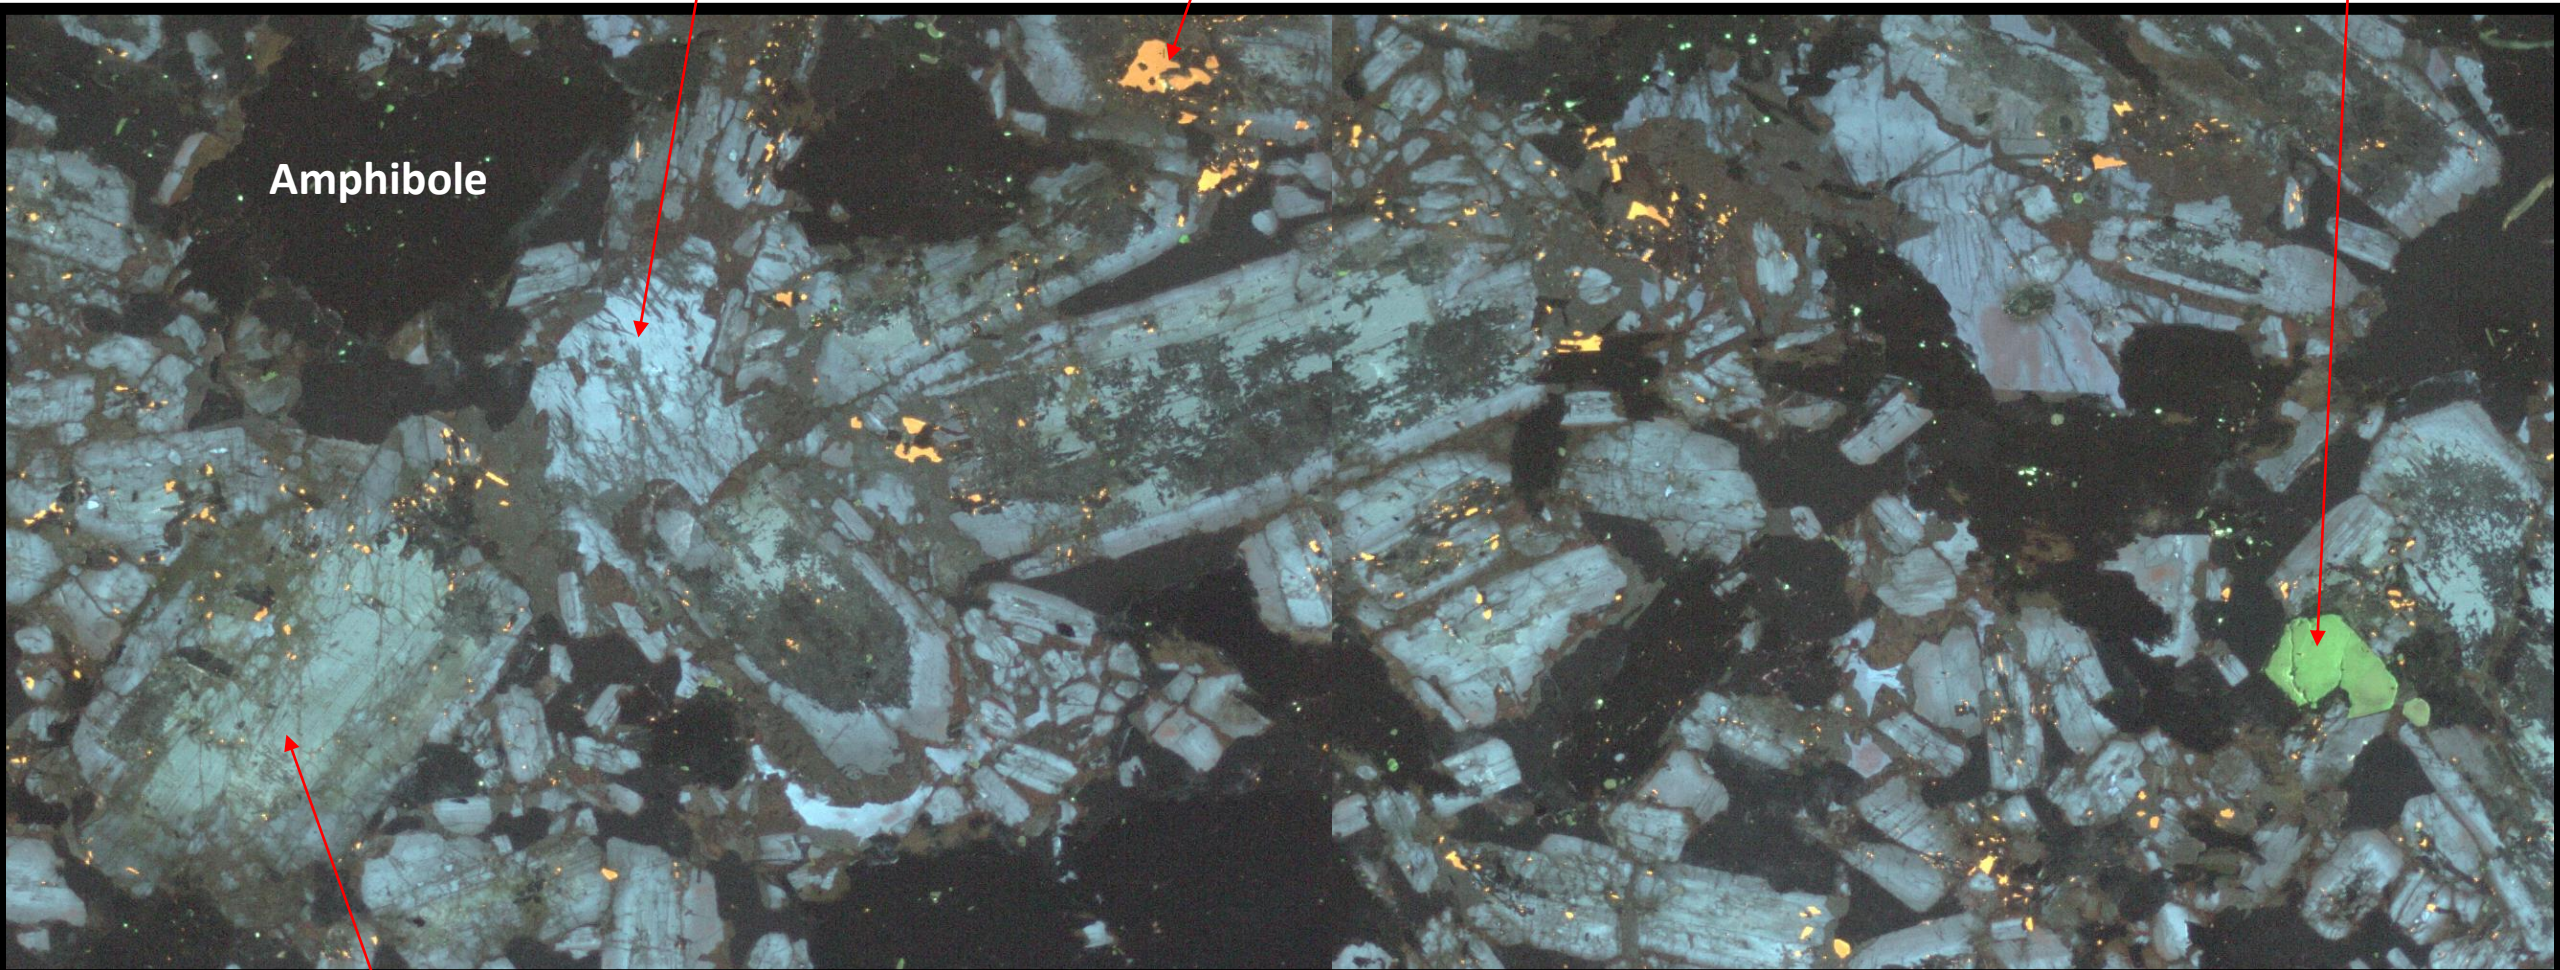



TR10 –  
phase 1a

1 mm

Feldspar

Carbonate

Amphibole

Interstitial  
quartz

Euhedral  
plagioclase

1 mm

Carbonate in  
fracture

Interstitial  
K-feldspar

Albitisation



TR41 –  
phase 1a

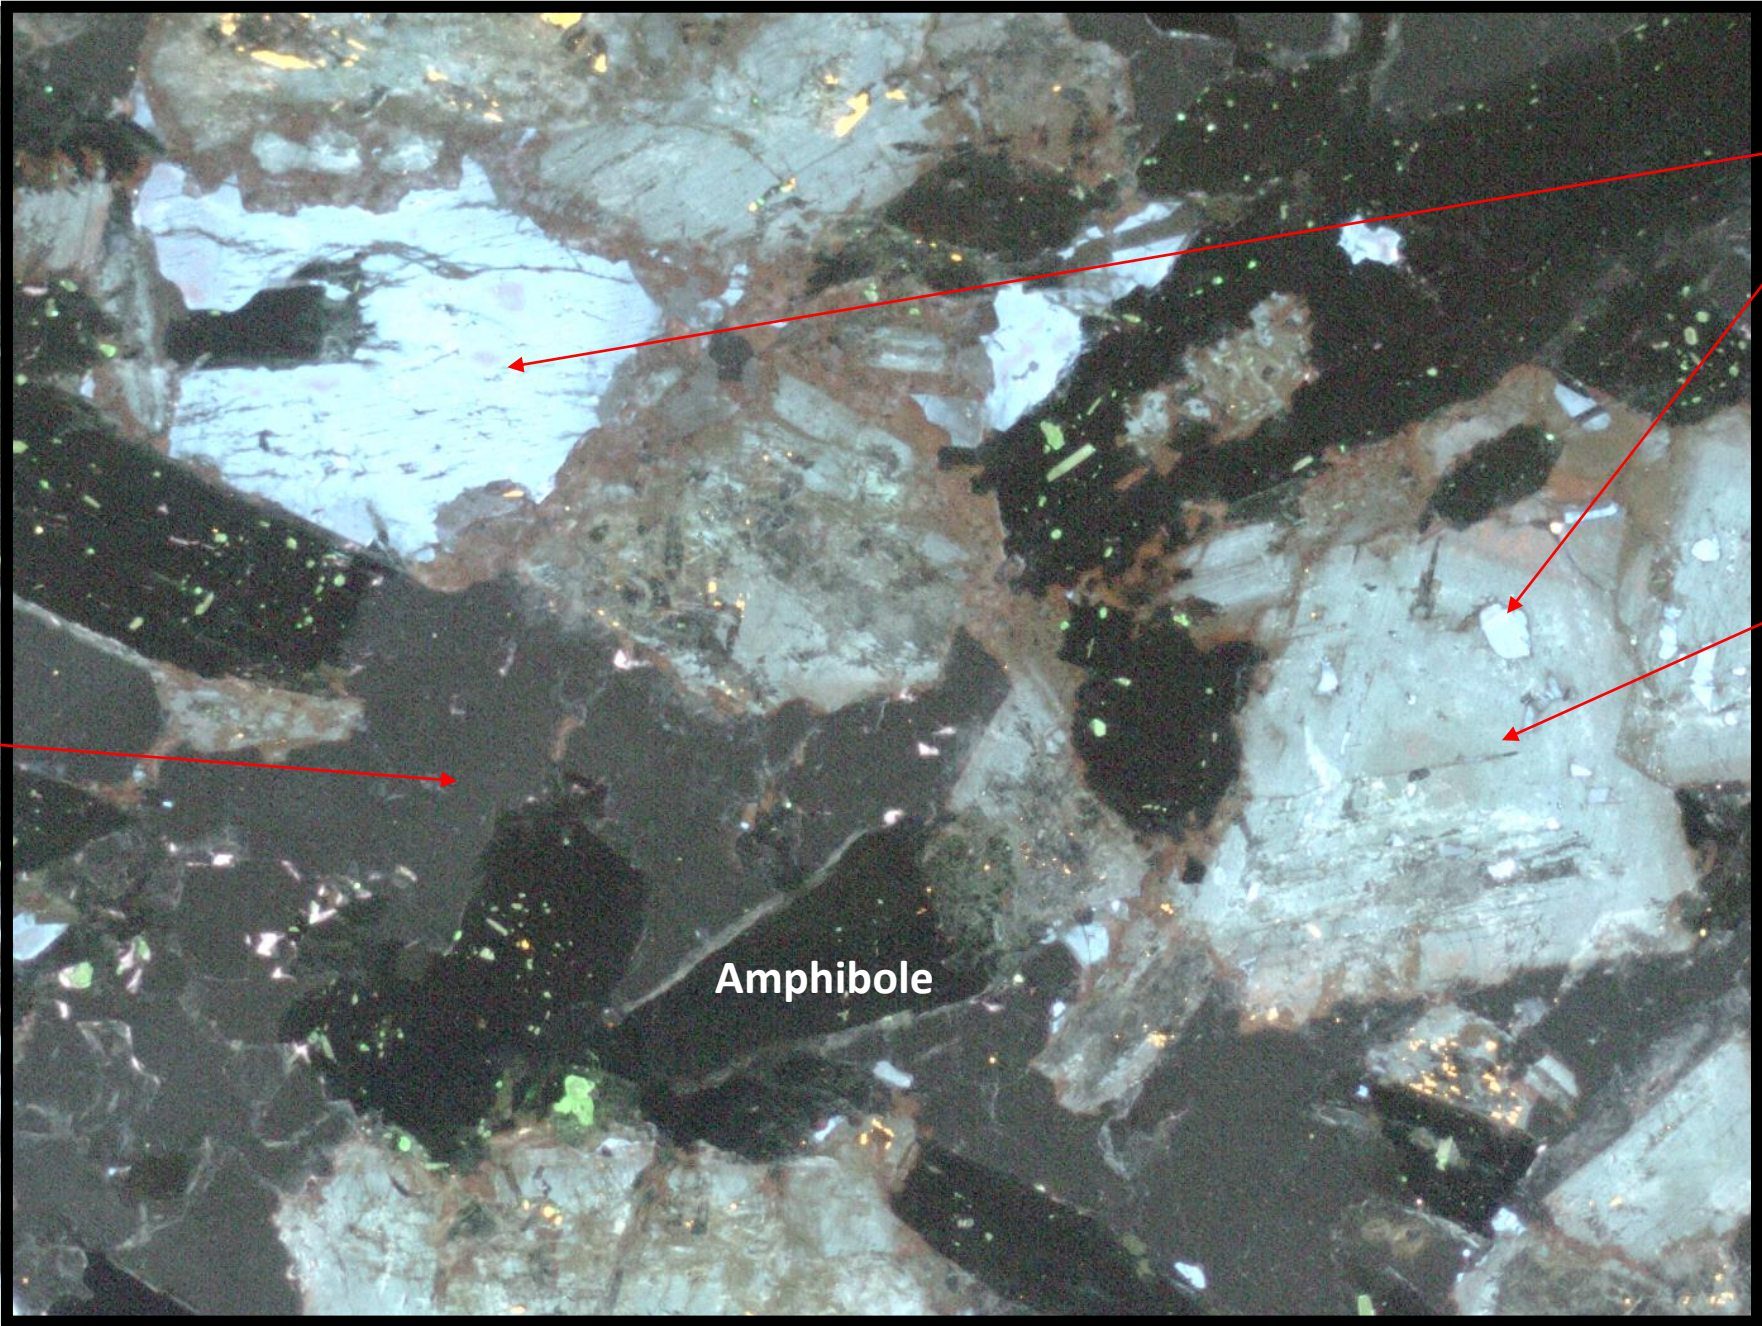

K-feldspar

Plagioclase

Amphibole

Interstitial  
quartz

1 mm



TR43 – phase 1a

Apatite

K-feldspar

Amphibole

Plagioclase

Quartz

1 mm

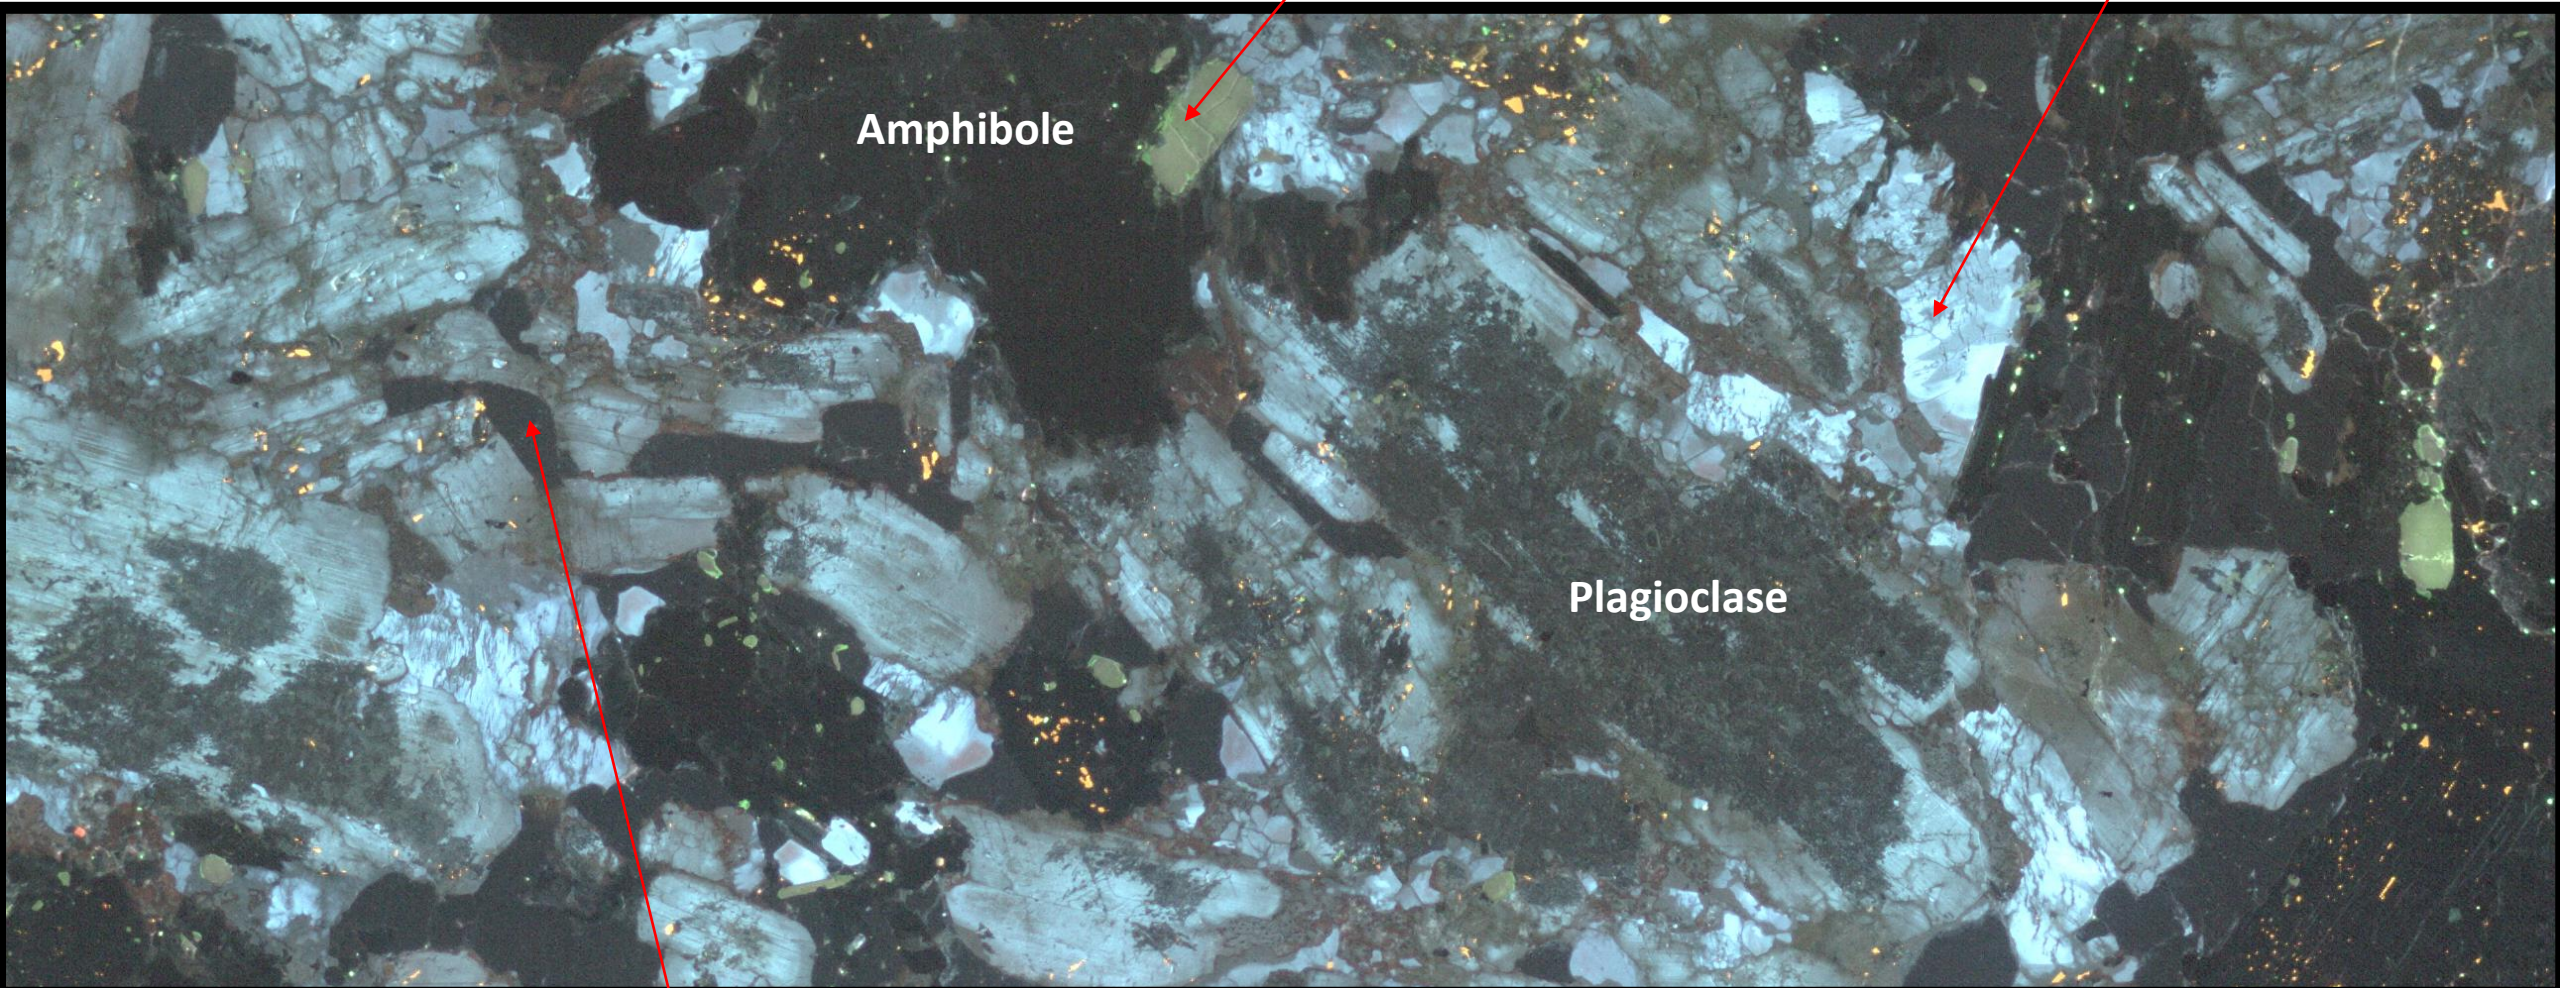



TR44 – phase 1a

Albitised  
plagioclase

Plagioclase

Interstitial  
K-feldspar

Carbonate

Amphibole

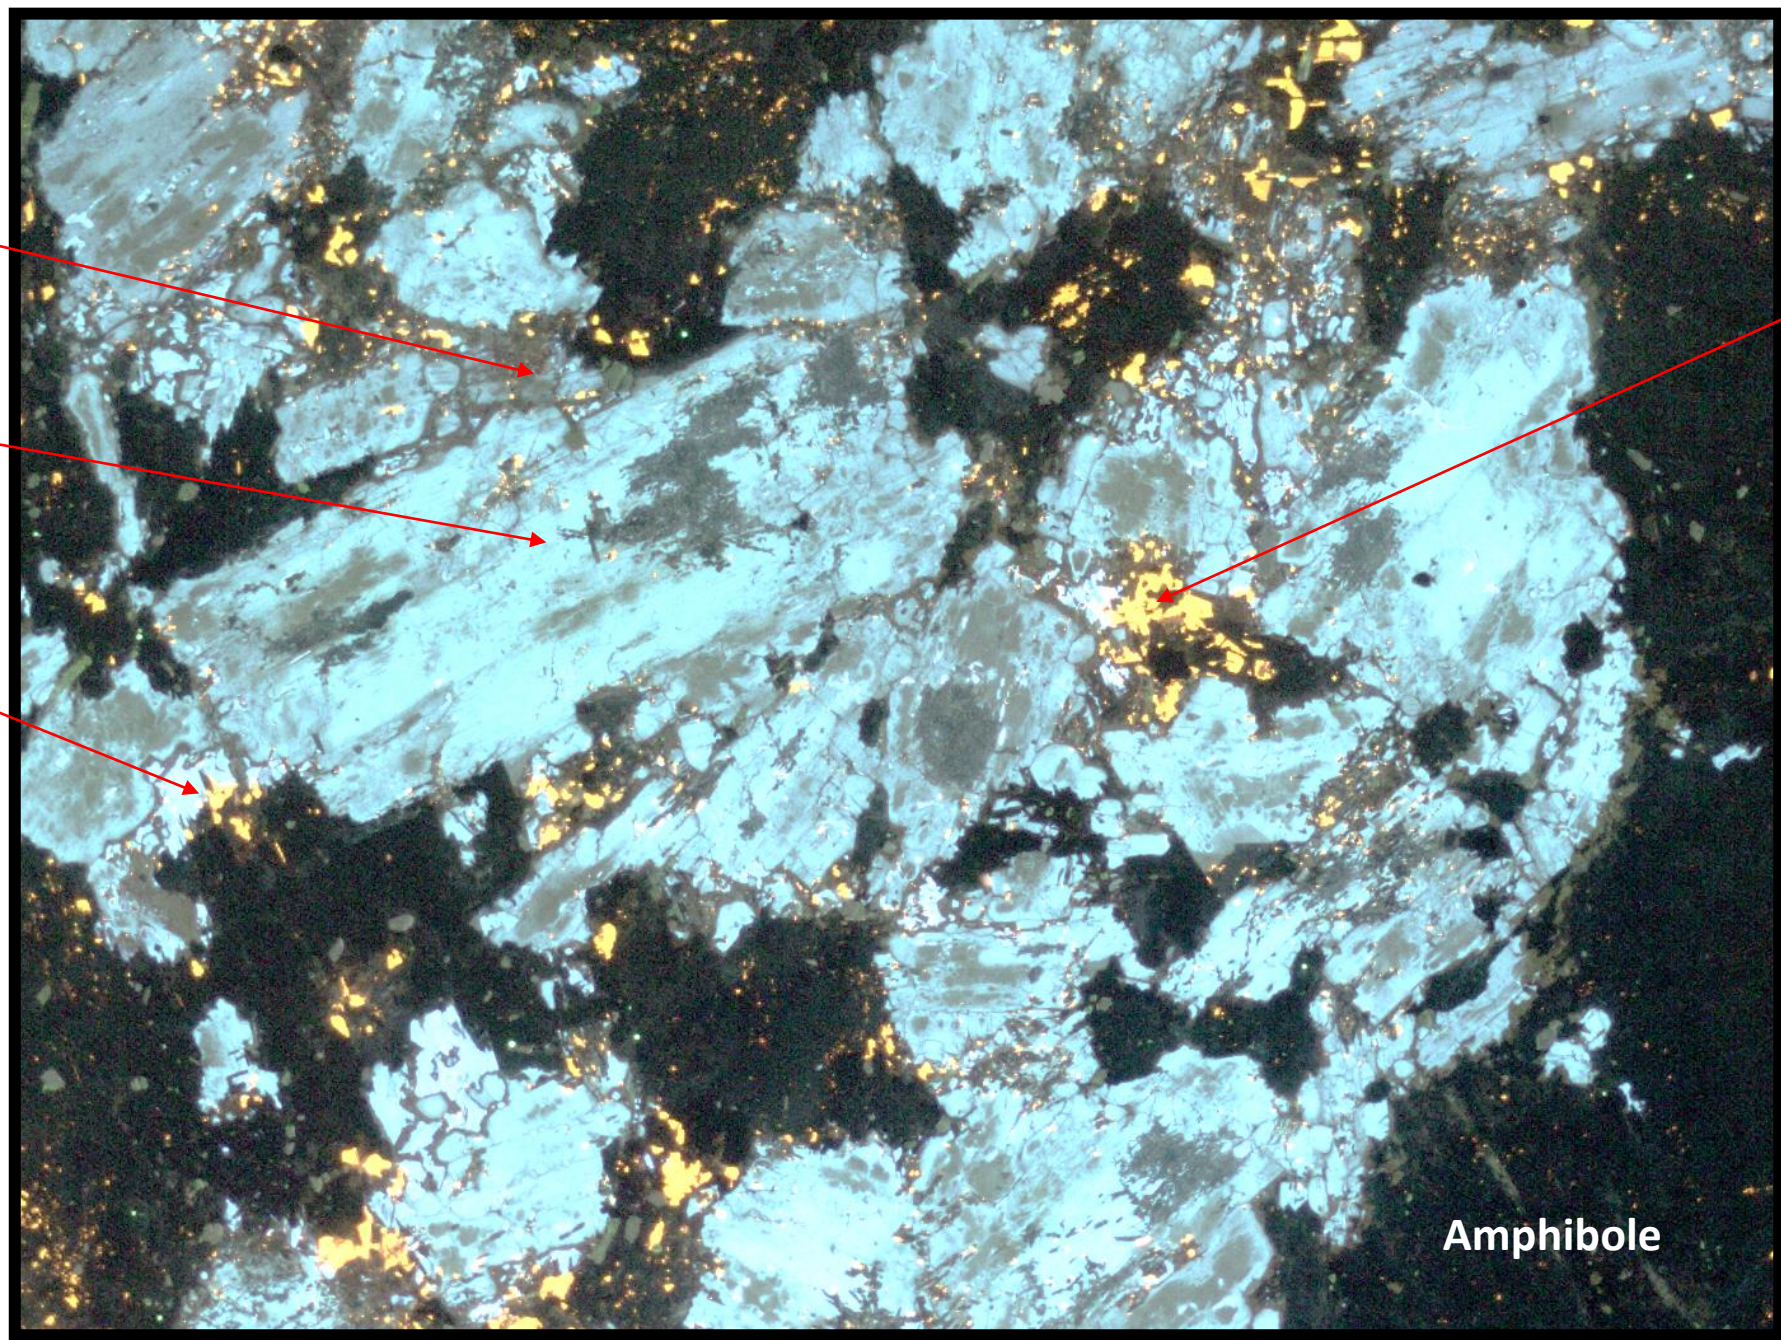

1 mm

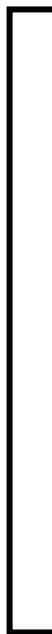



TR03 –  
phase 1b

Amphibole  
-biotite

Elongated  
apatite

Altered  
feldspar

1 mm

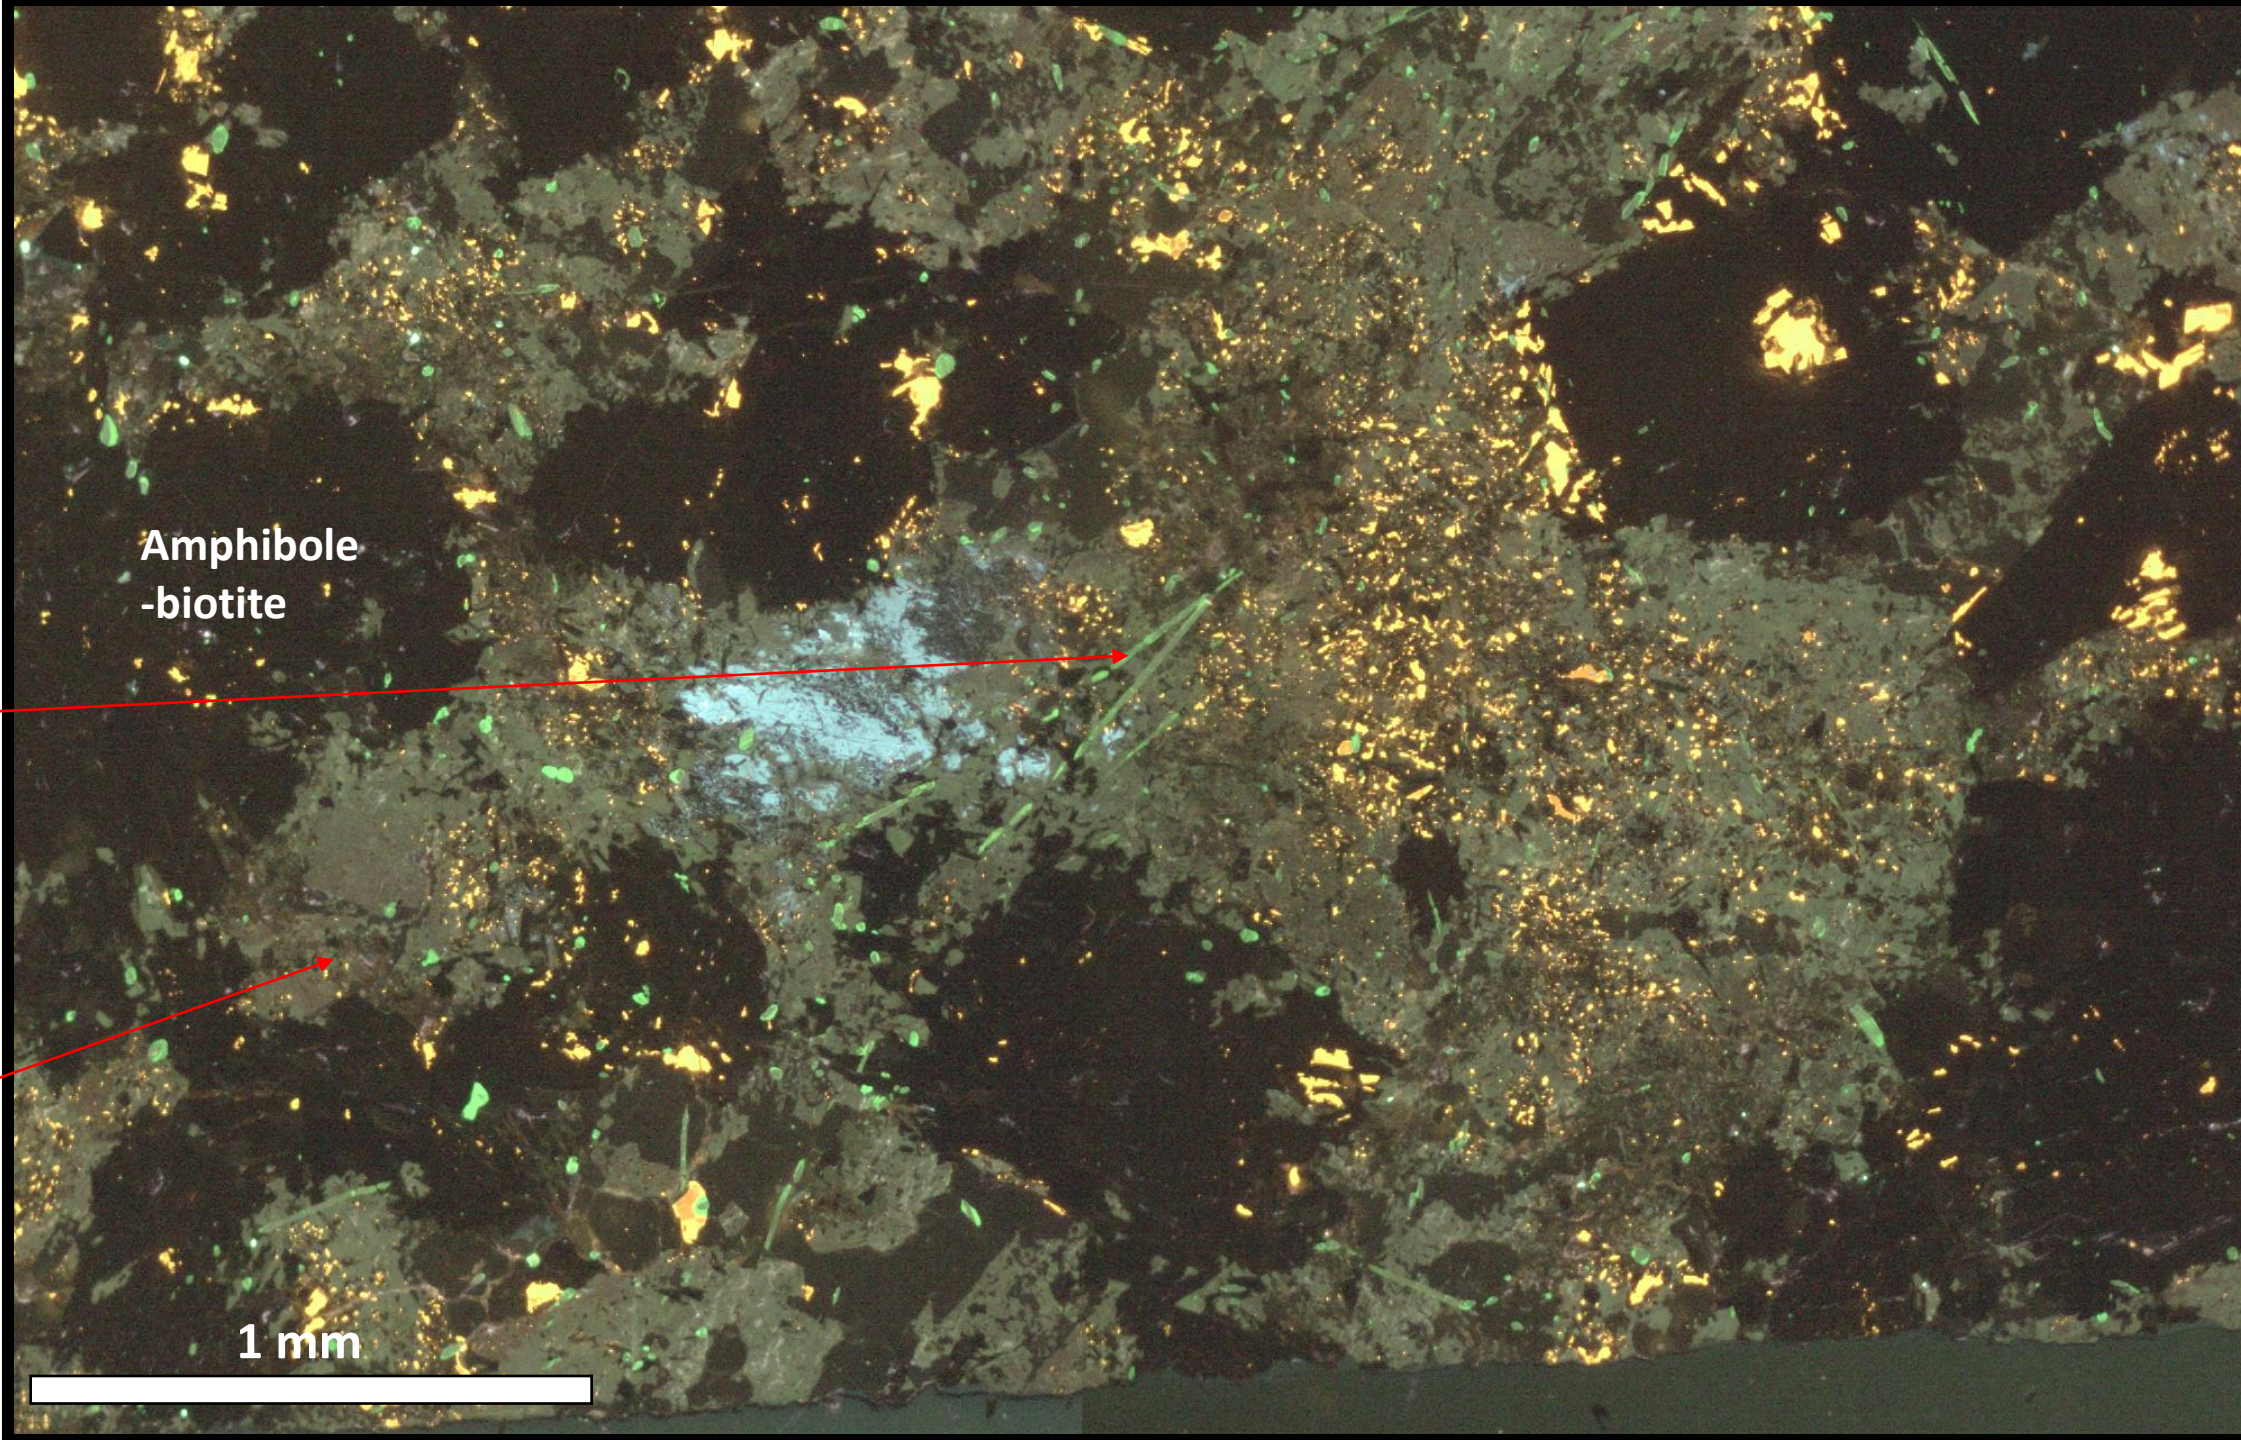



TR05 –  
phase 1b

Plagioclase

Amphibole  
(and  
carbonates)

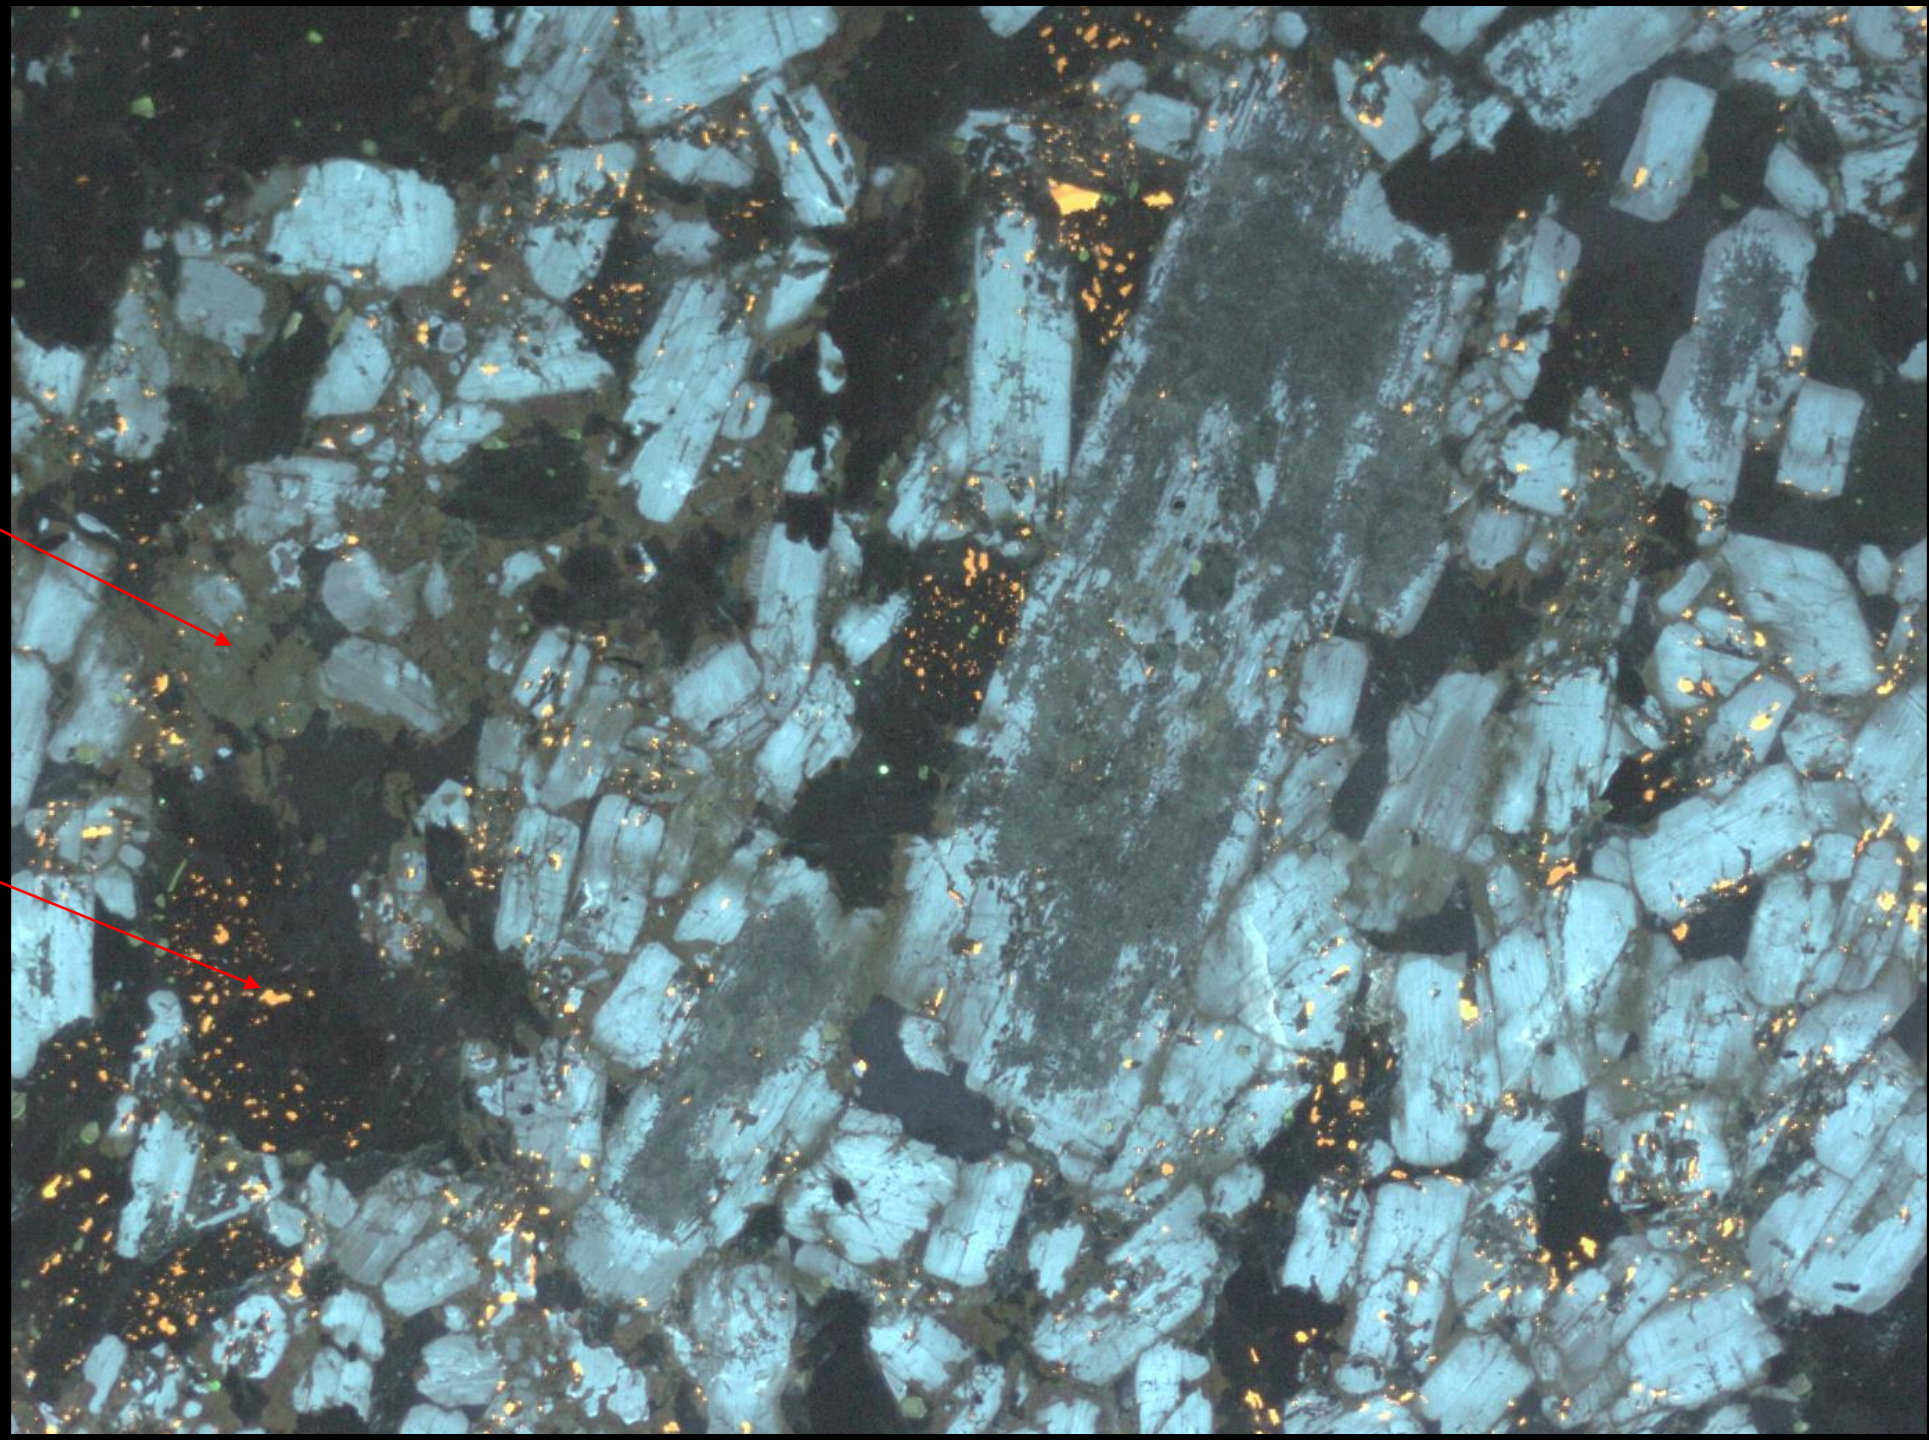

1 mm



TR07 –  
phase 1b

1 mm

Elongated  
apatite

Interstitial  
quartz

Feldspar  
(weakly  
altered)

Carbonate

Feldspar  
(sericitised)

Elongated  
and euhedral  
feldspar

Amphibole

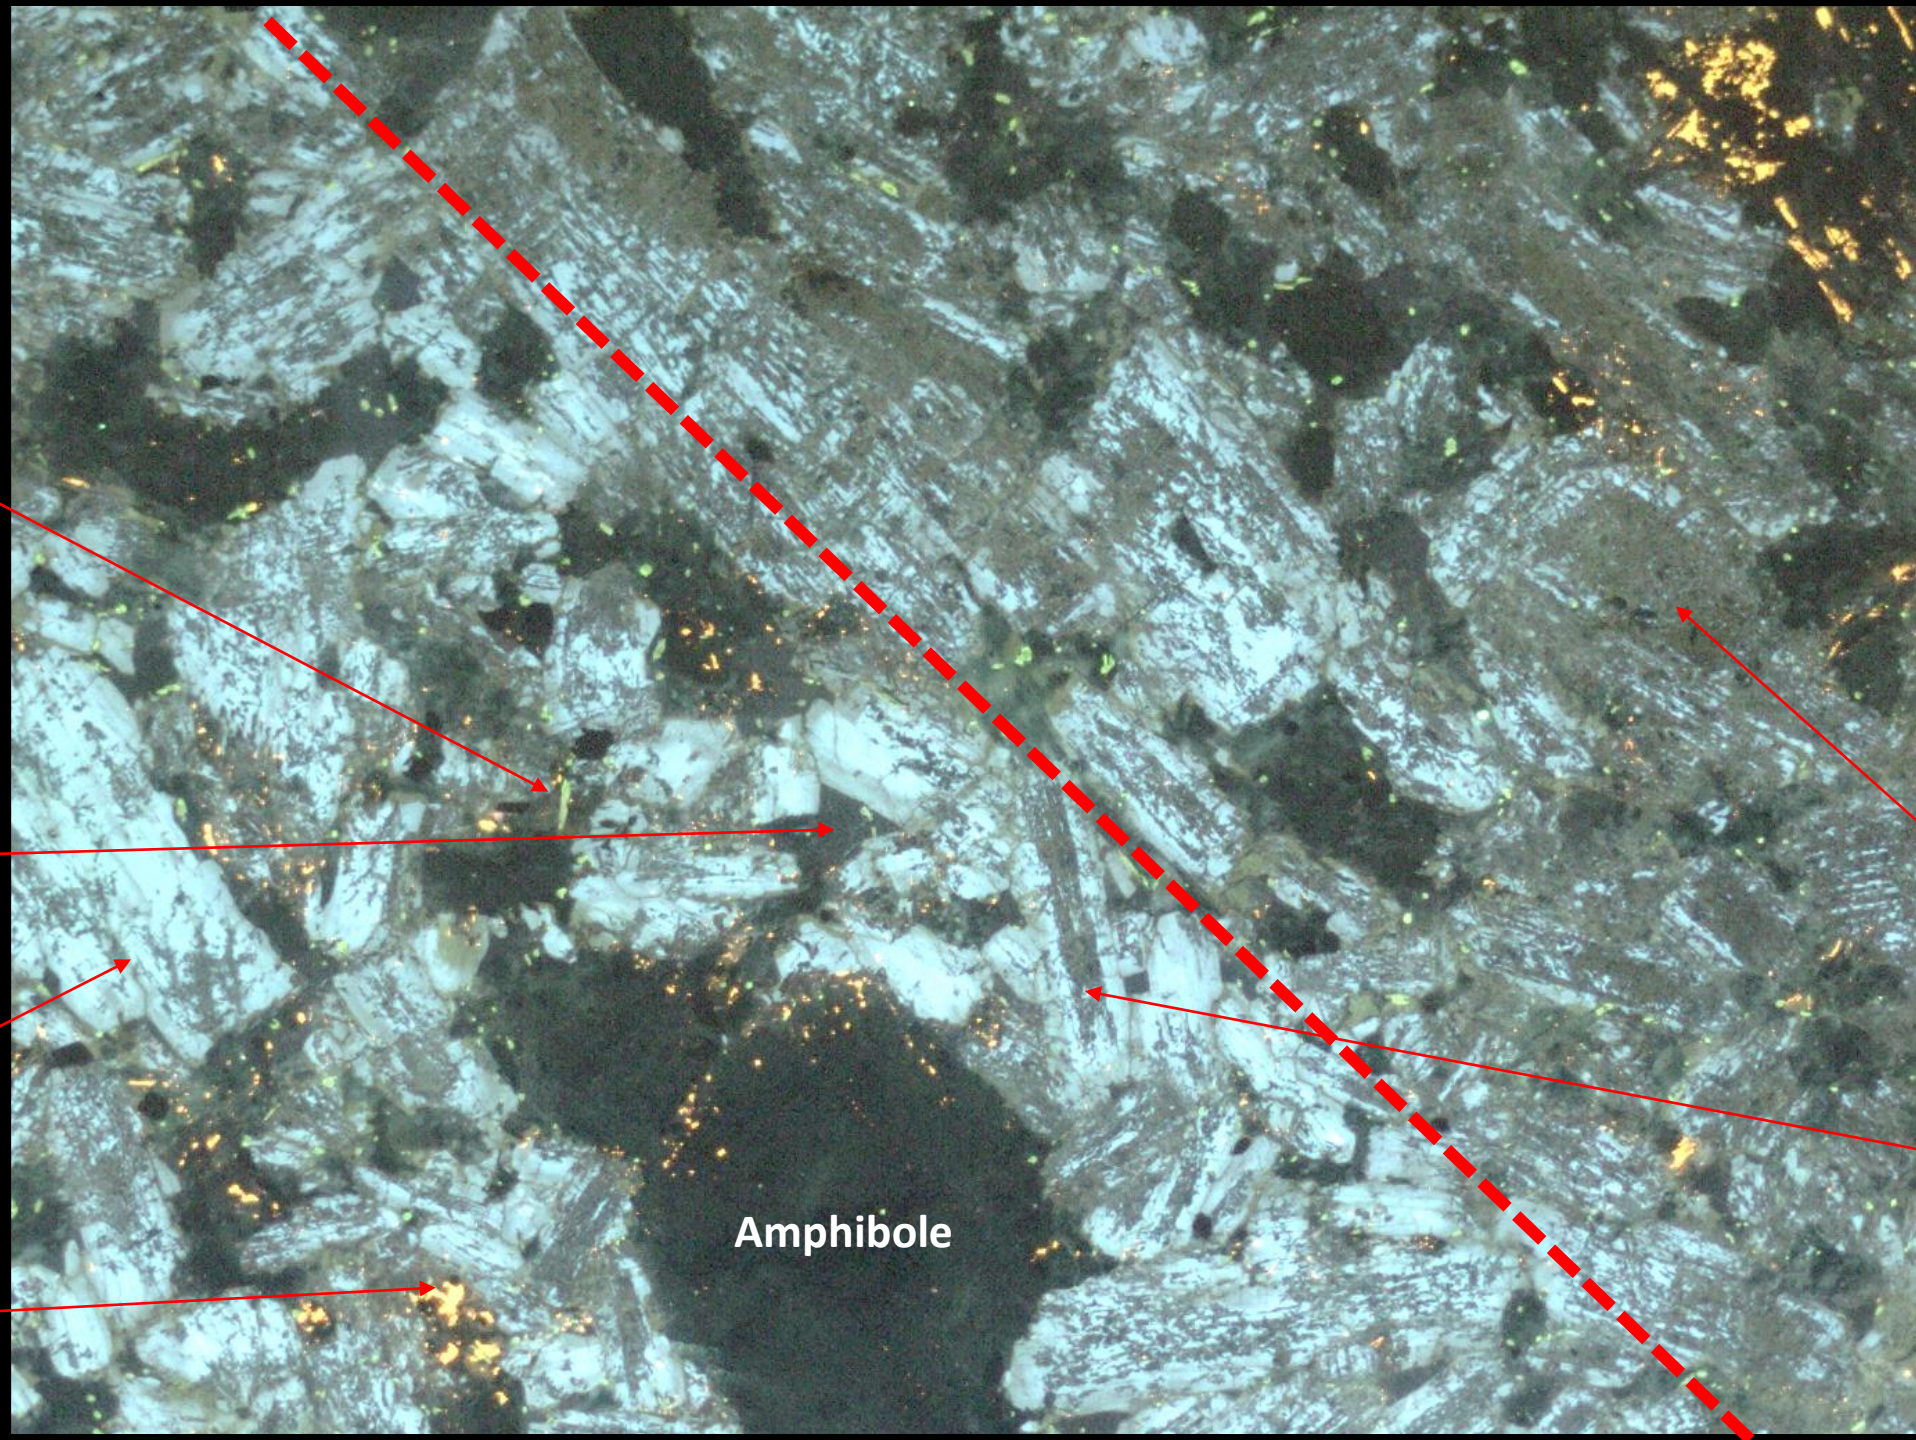



TR13 – phase 1b

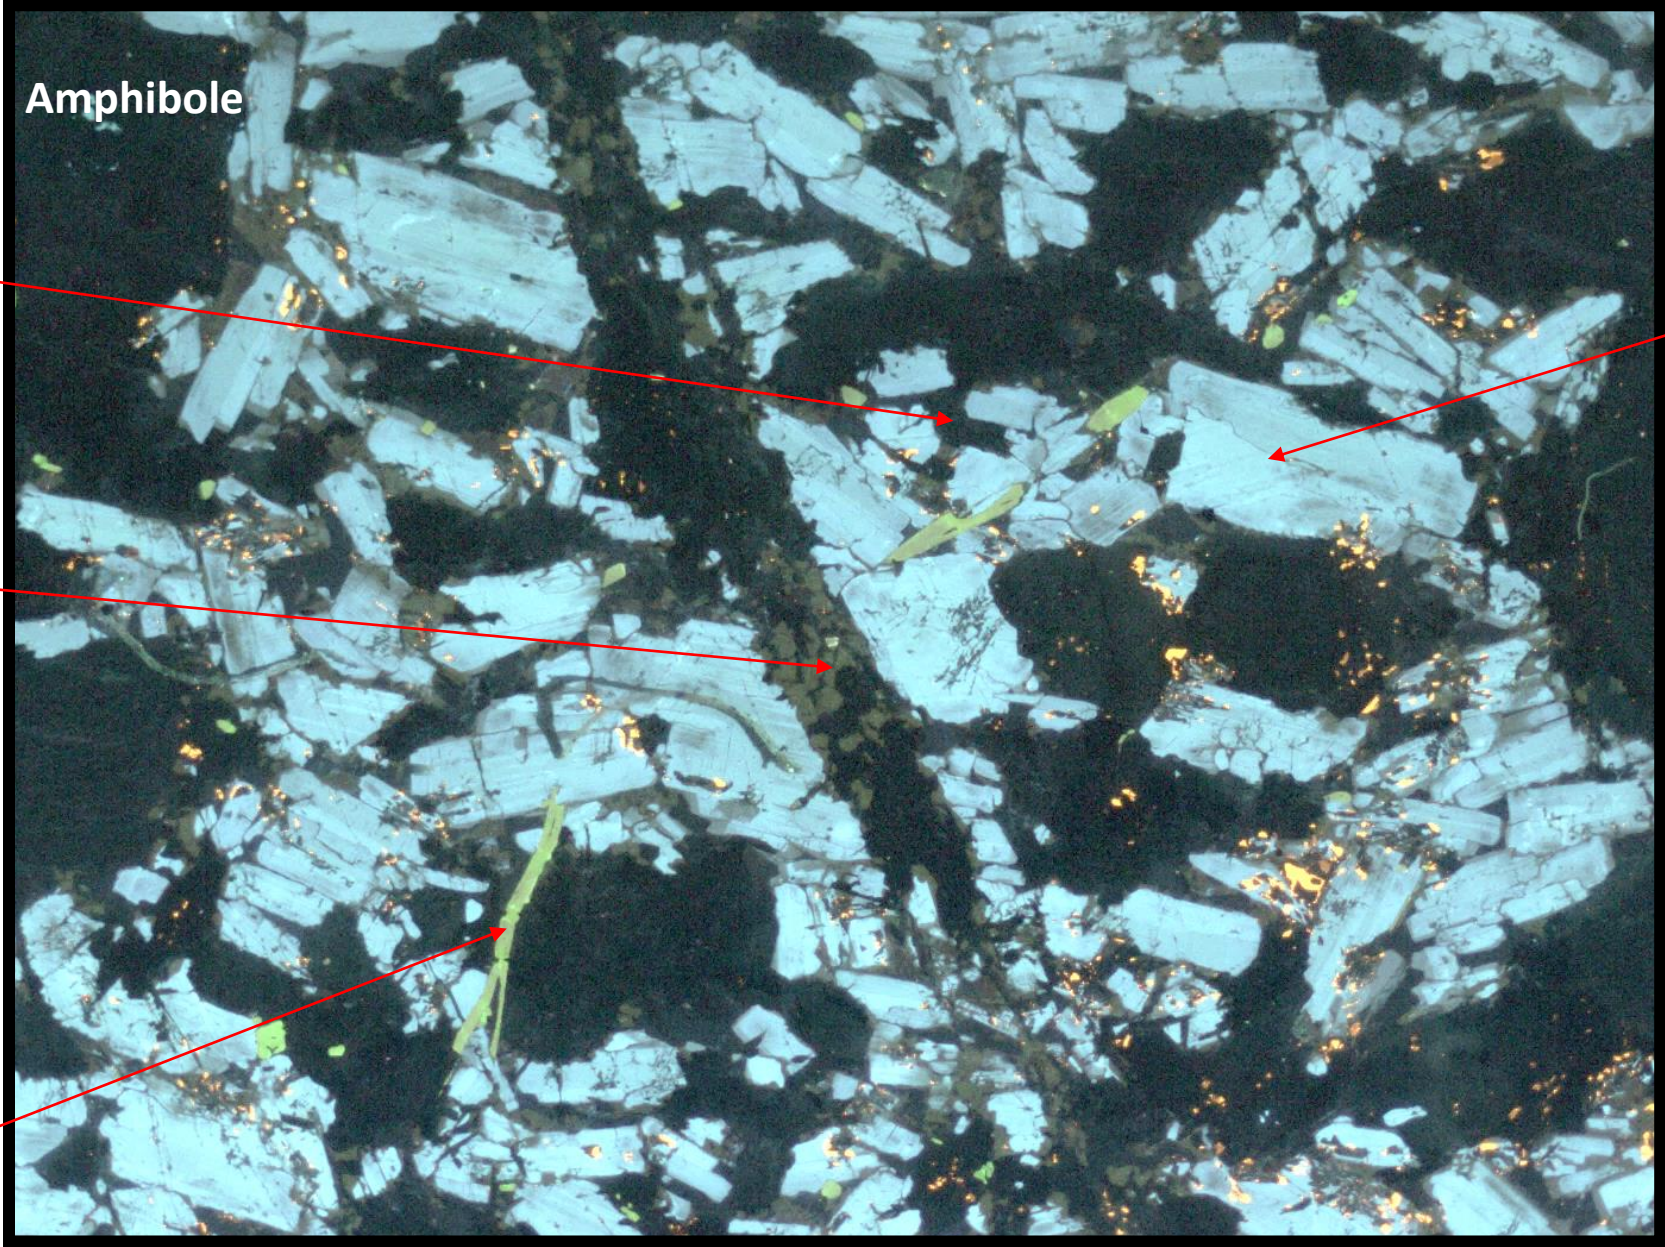

Amphibole

Interstitial  
quartz

Albitisation  
along fracture

Elongated  
apatite

Euhedral  
plagioclase

1 mm



TR15 – phase 1b

1 mm

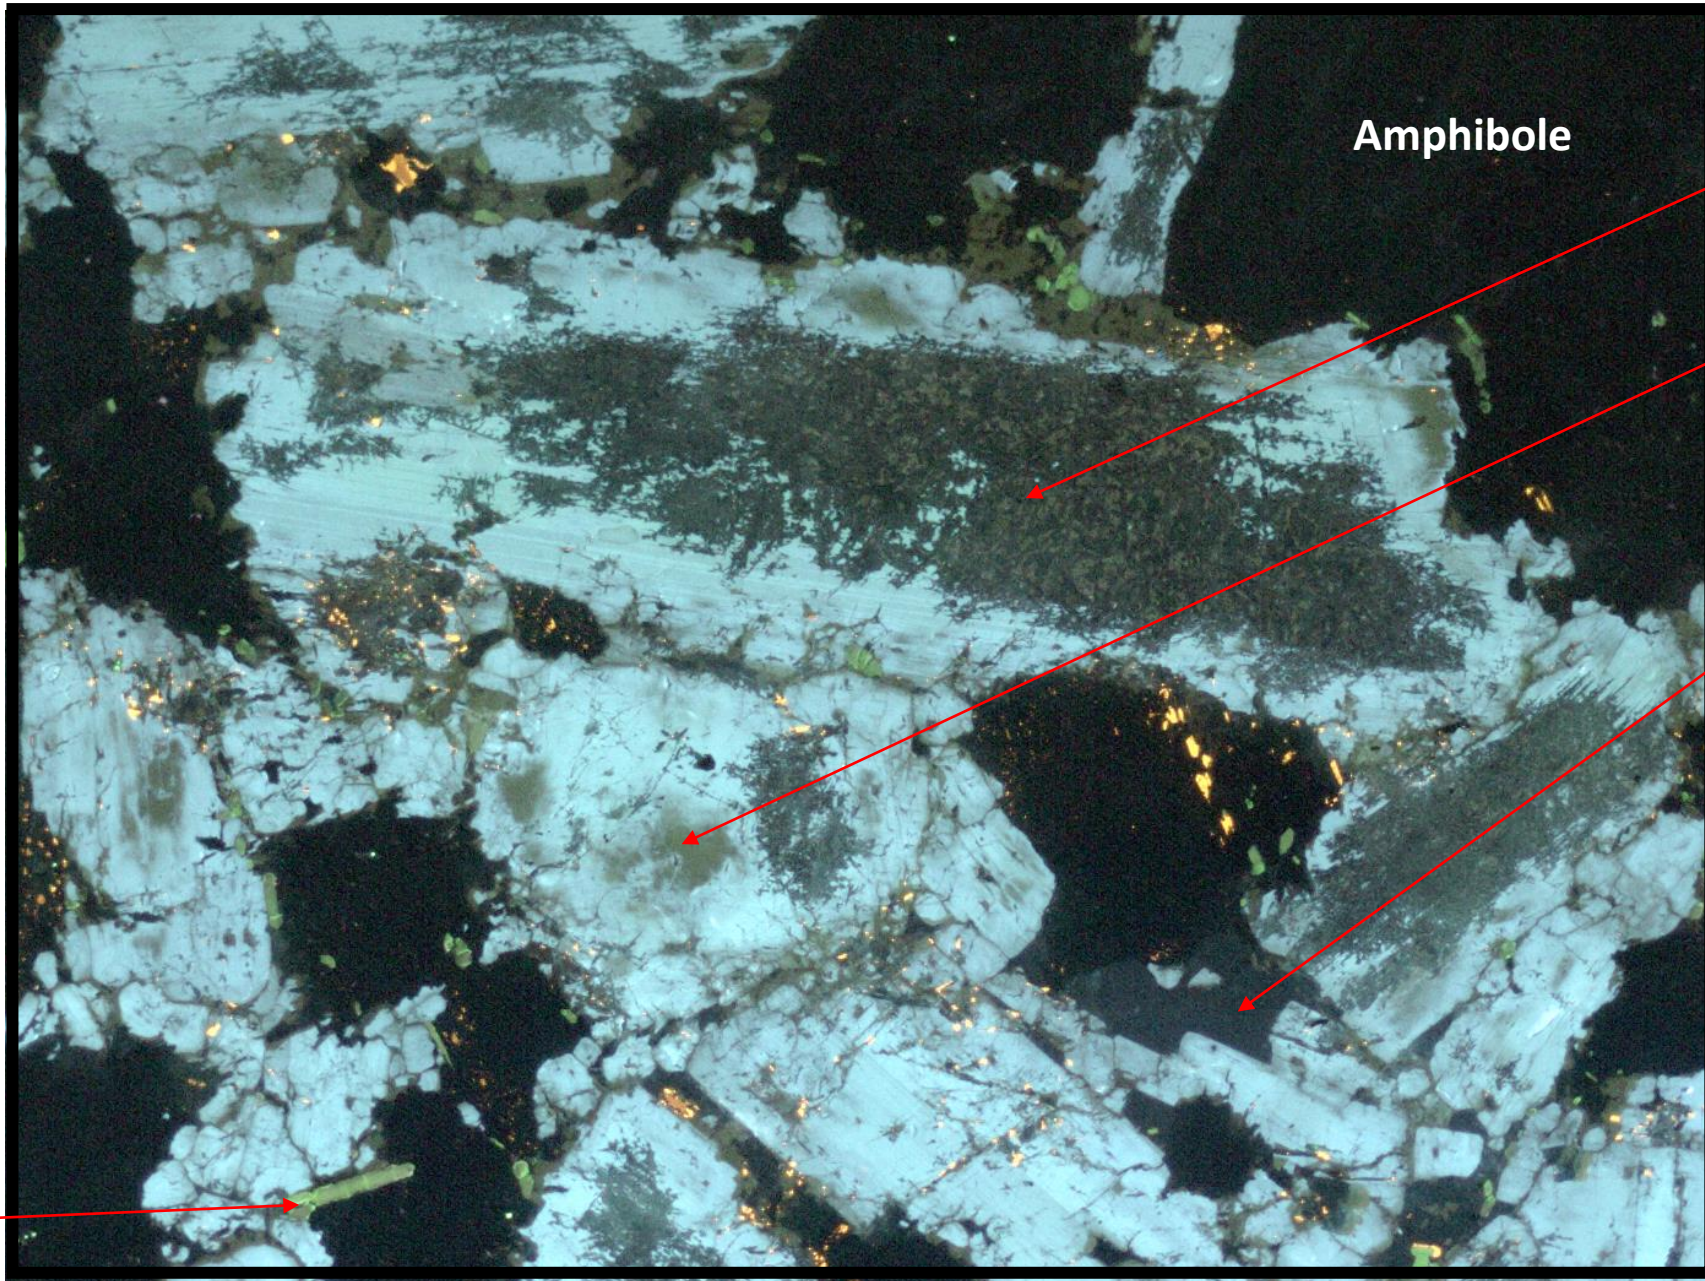

Amphibole

sericitisation

Albitisation

Interstitial  
quartz

Elongated  
apatite



TR40 – phase 1b

Plagioclase

Interstitial  
quartz

Elongated  
apatite

Amphibole

1 mm

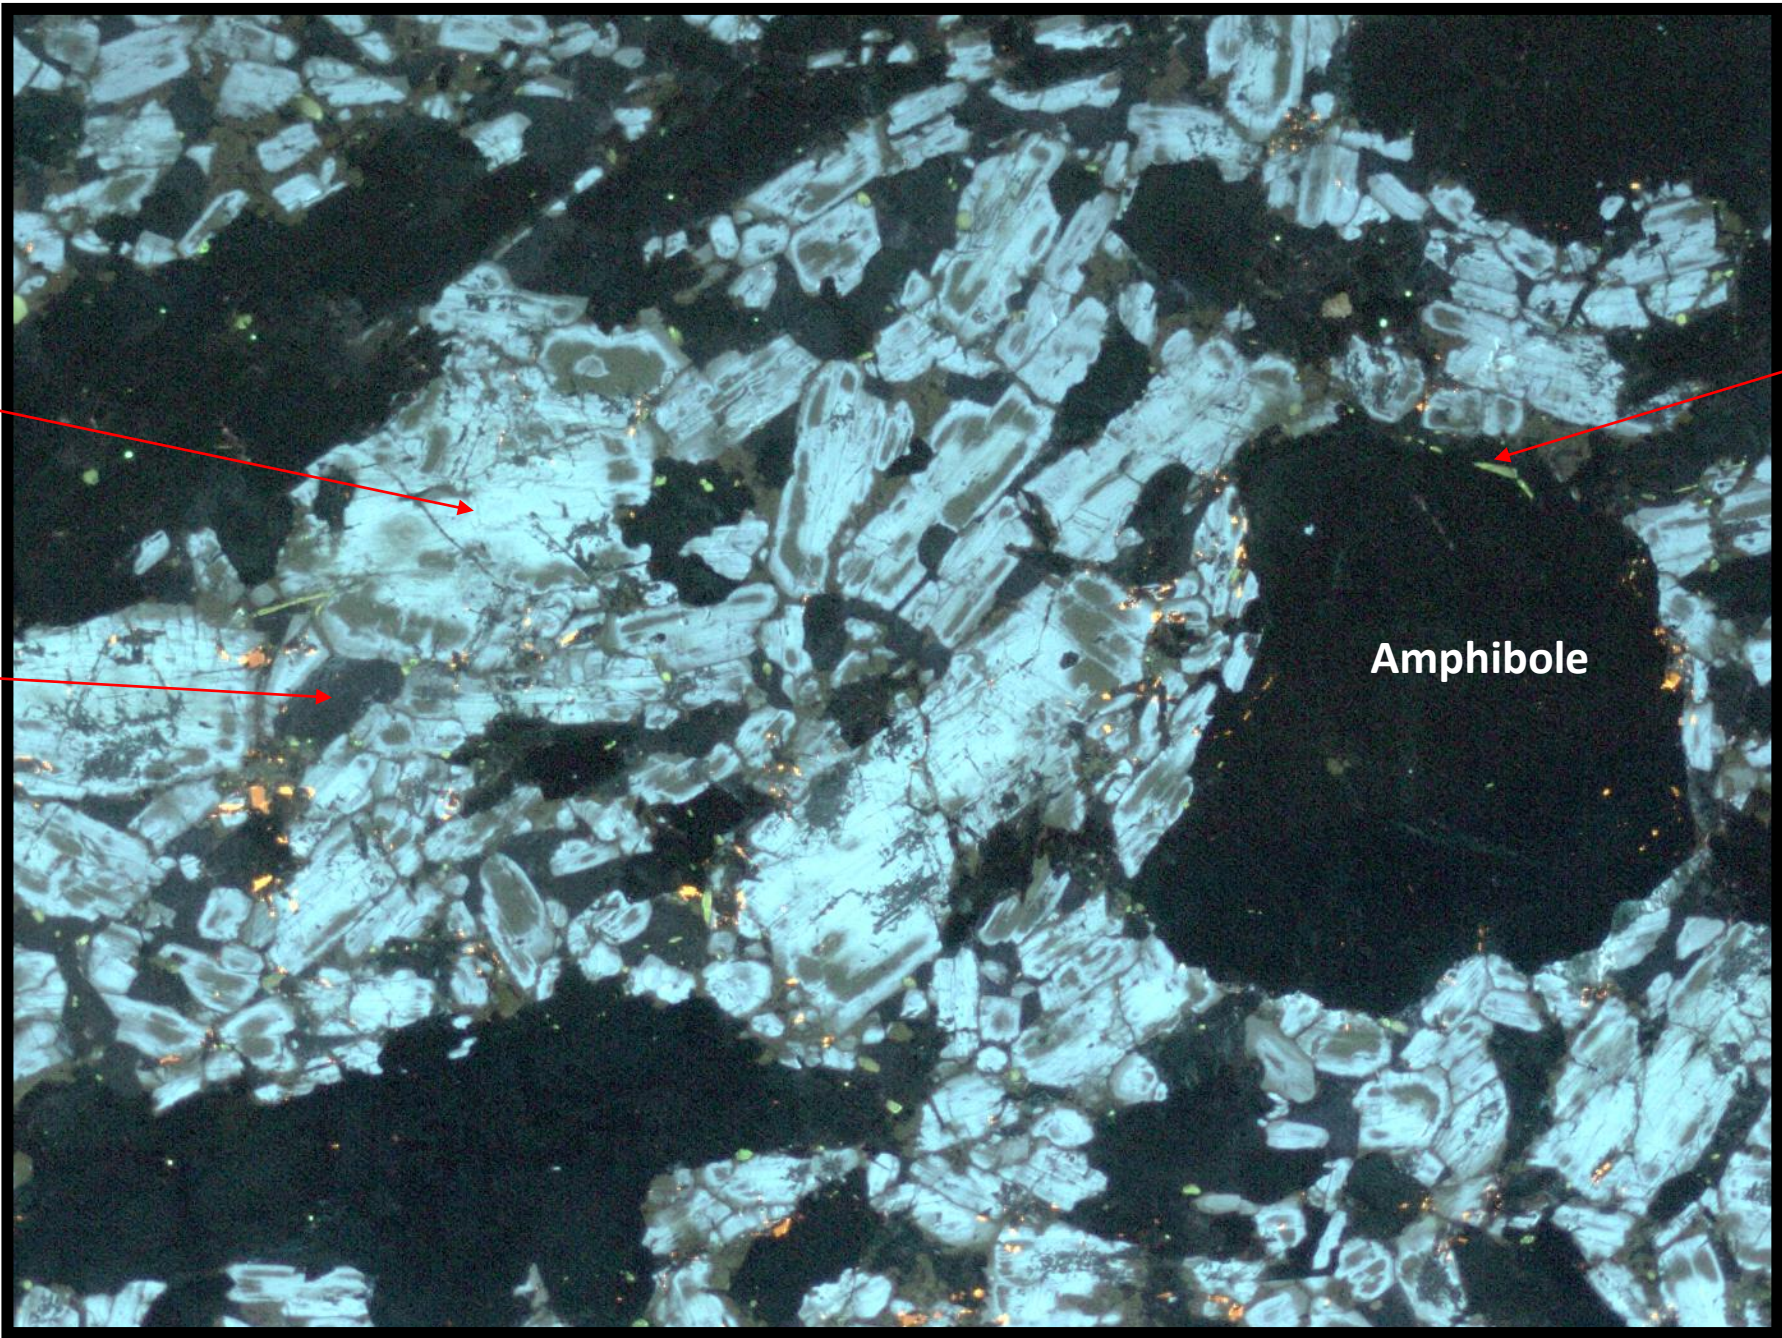



TR16 – phase 1c

Carbonate

Plagioclase  
phenocryst

Albitised  
plagioclase

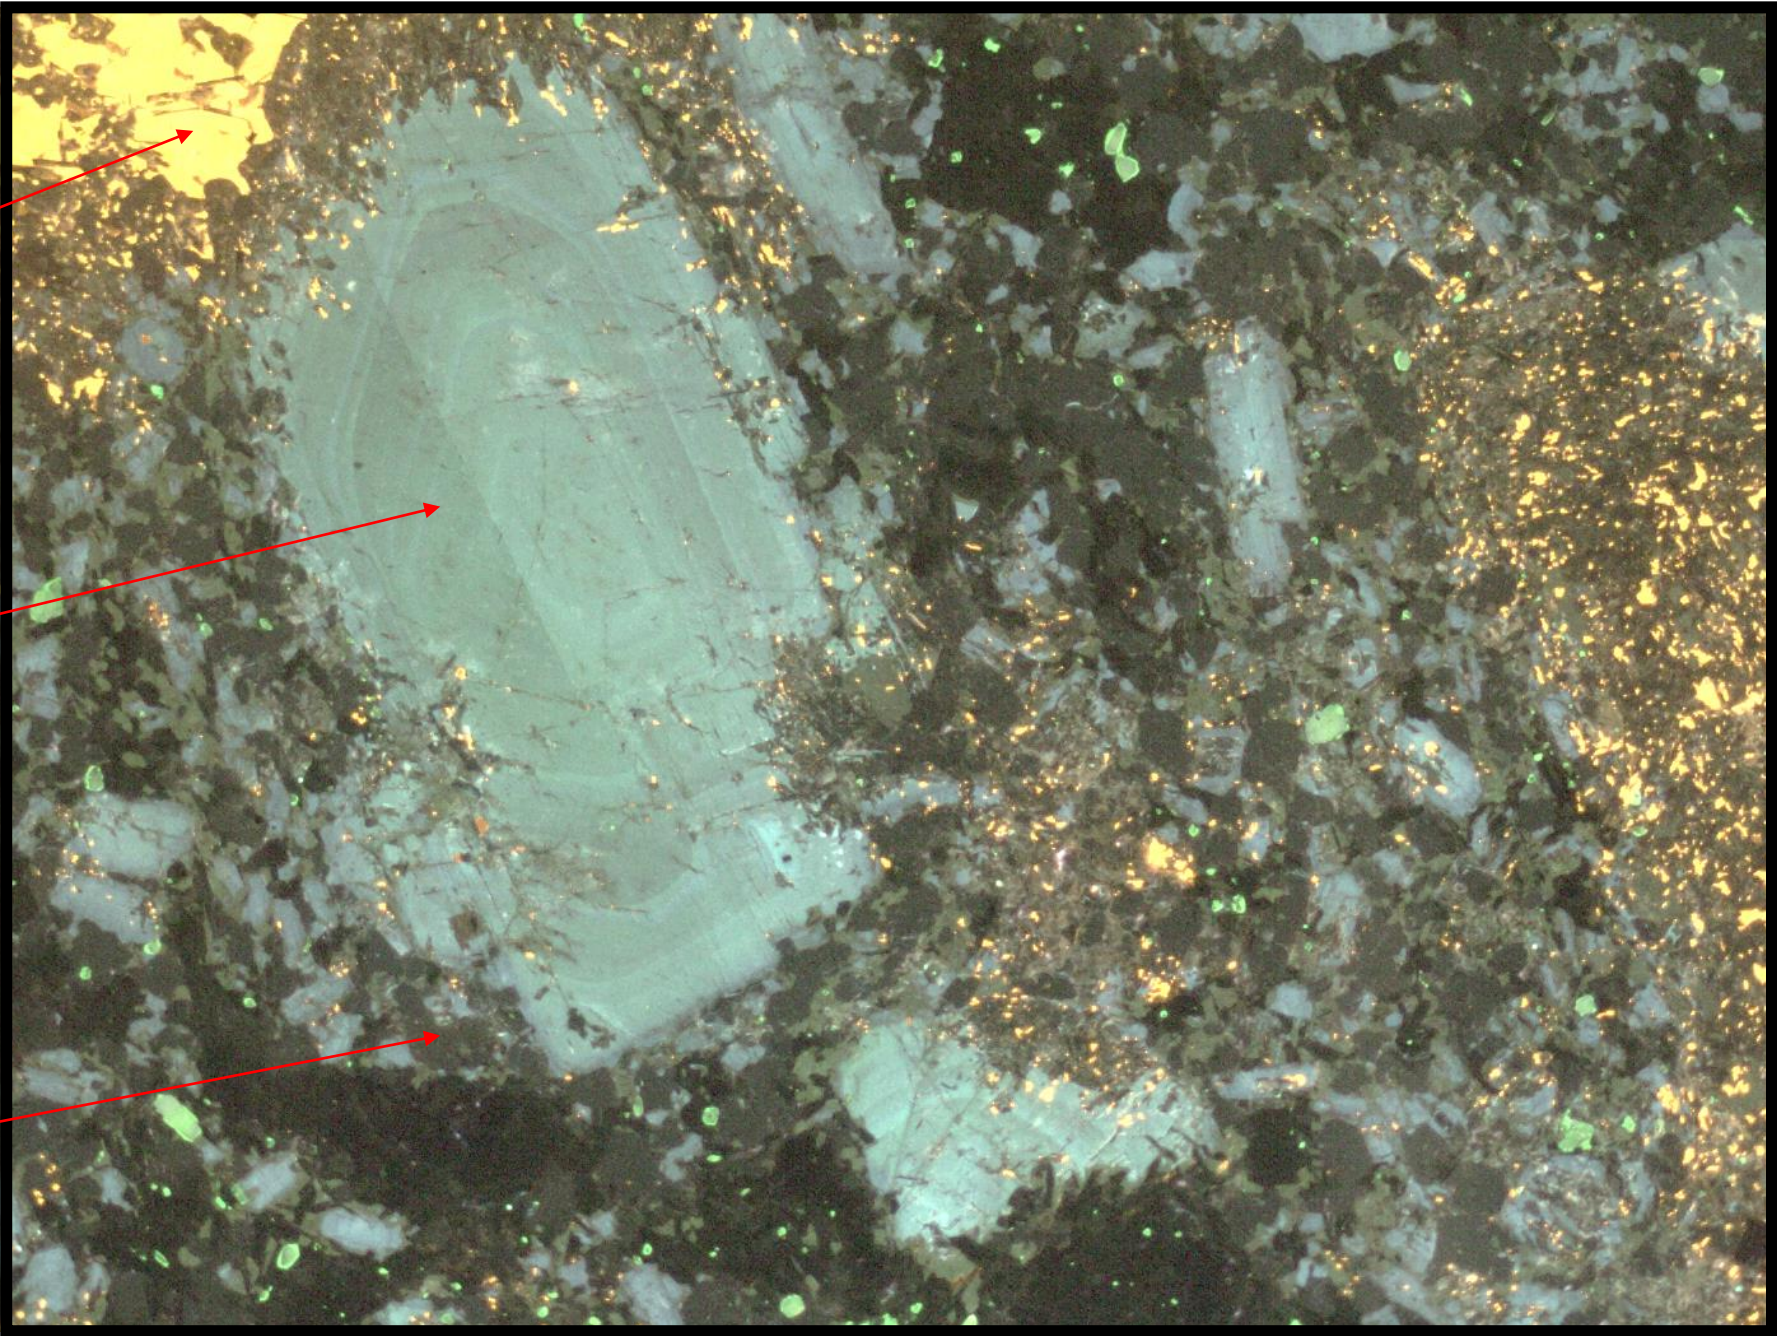

1 mm

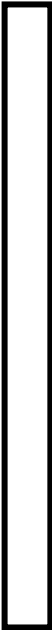



TR21 – phase 1c

Carbonate

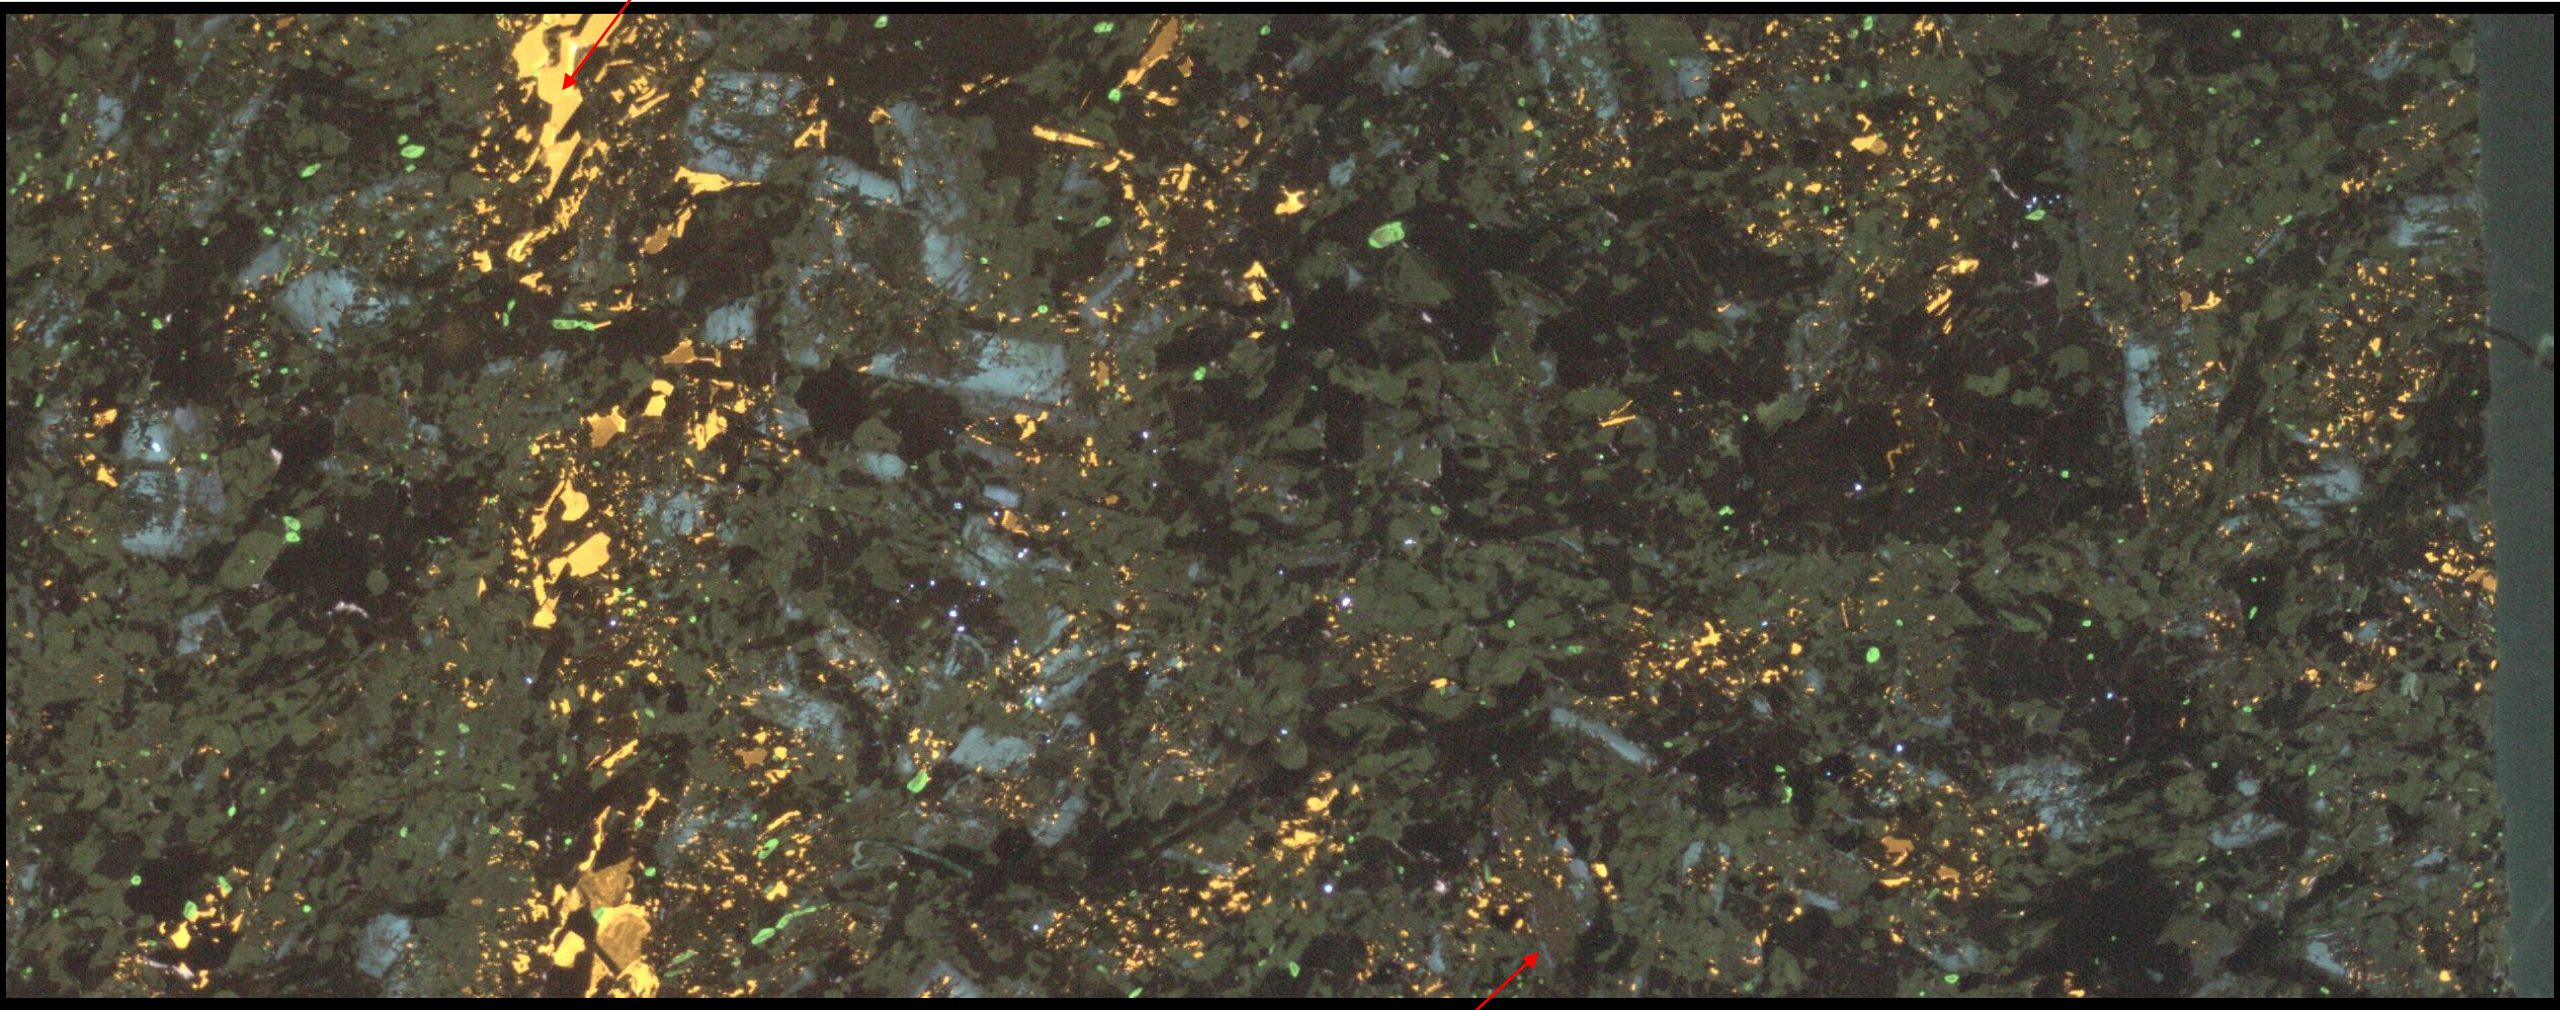

Albitised  
plagioclase

1 mm

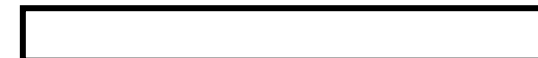



TR29 –  
phase 1c

Carbonate

Feldspar

Amphibole-  
biotite

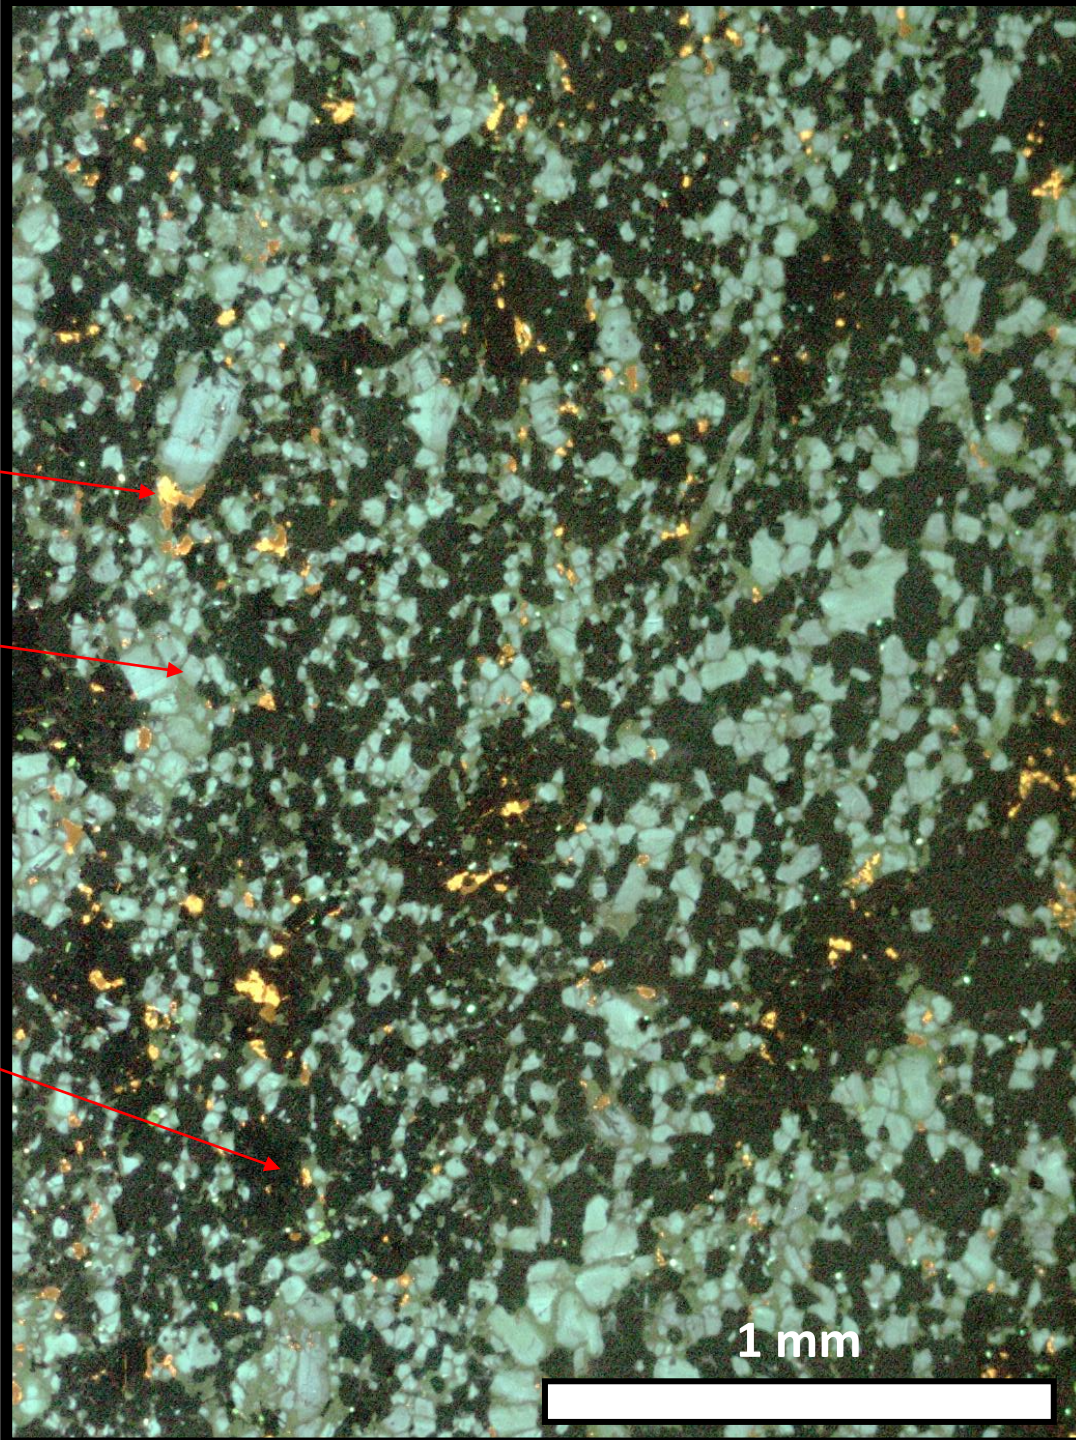

1 mm

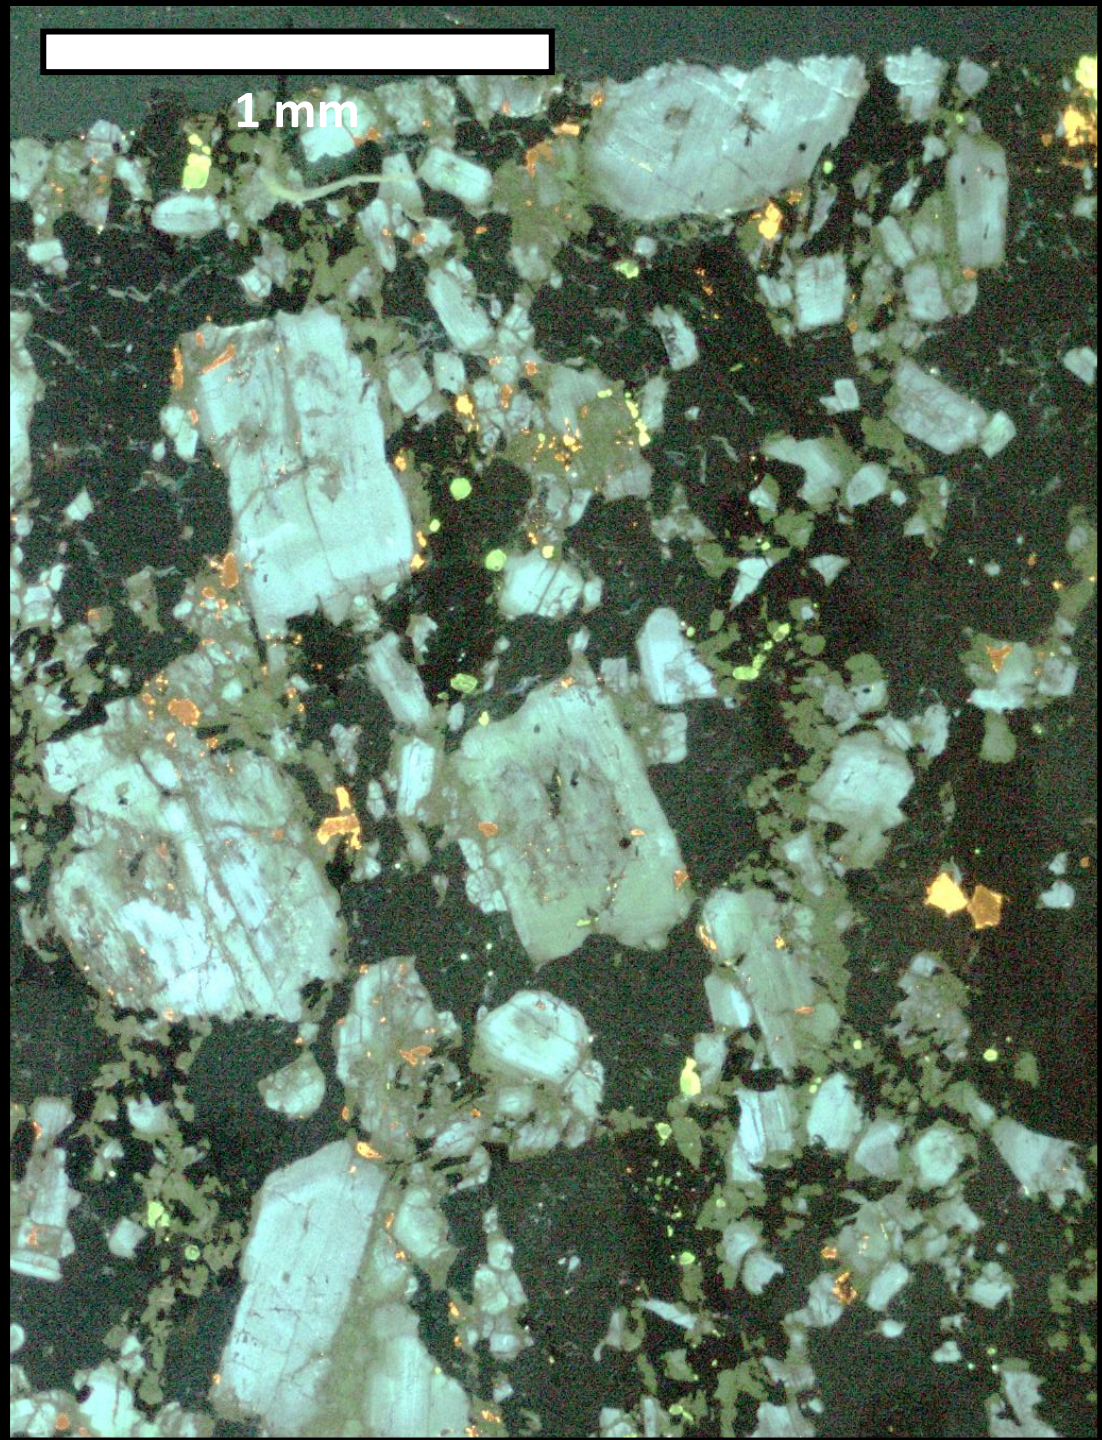

1 mm



TR04 – phase 2

Apatite

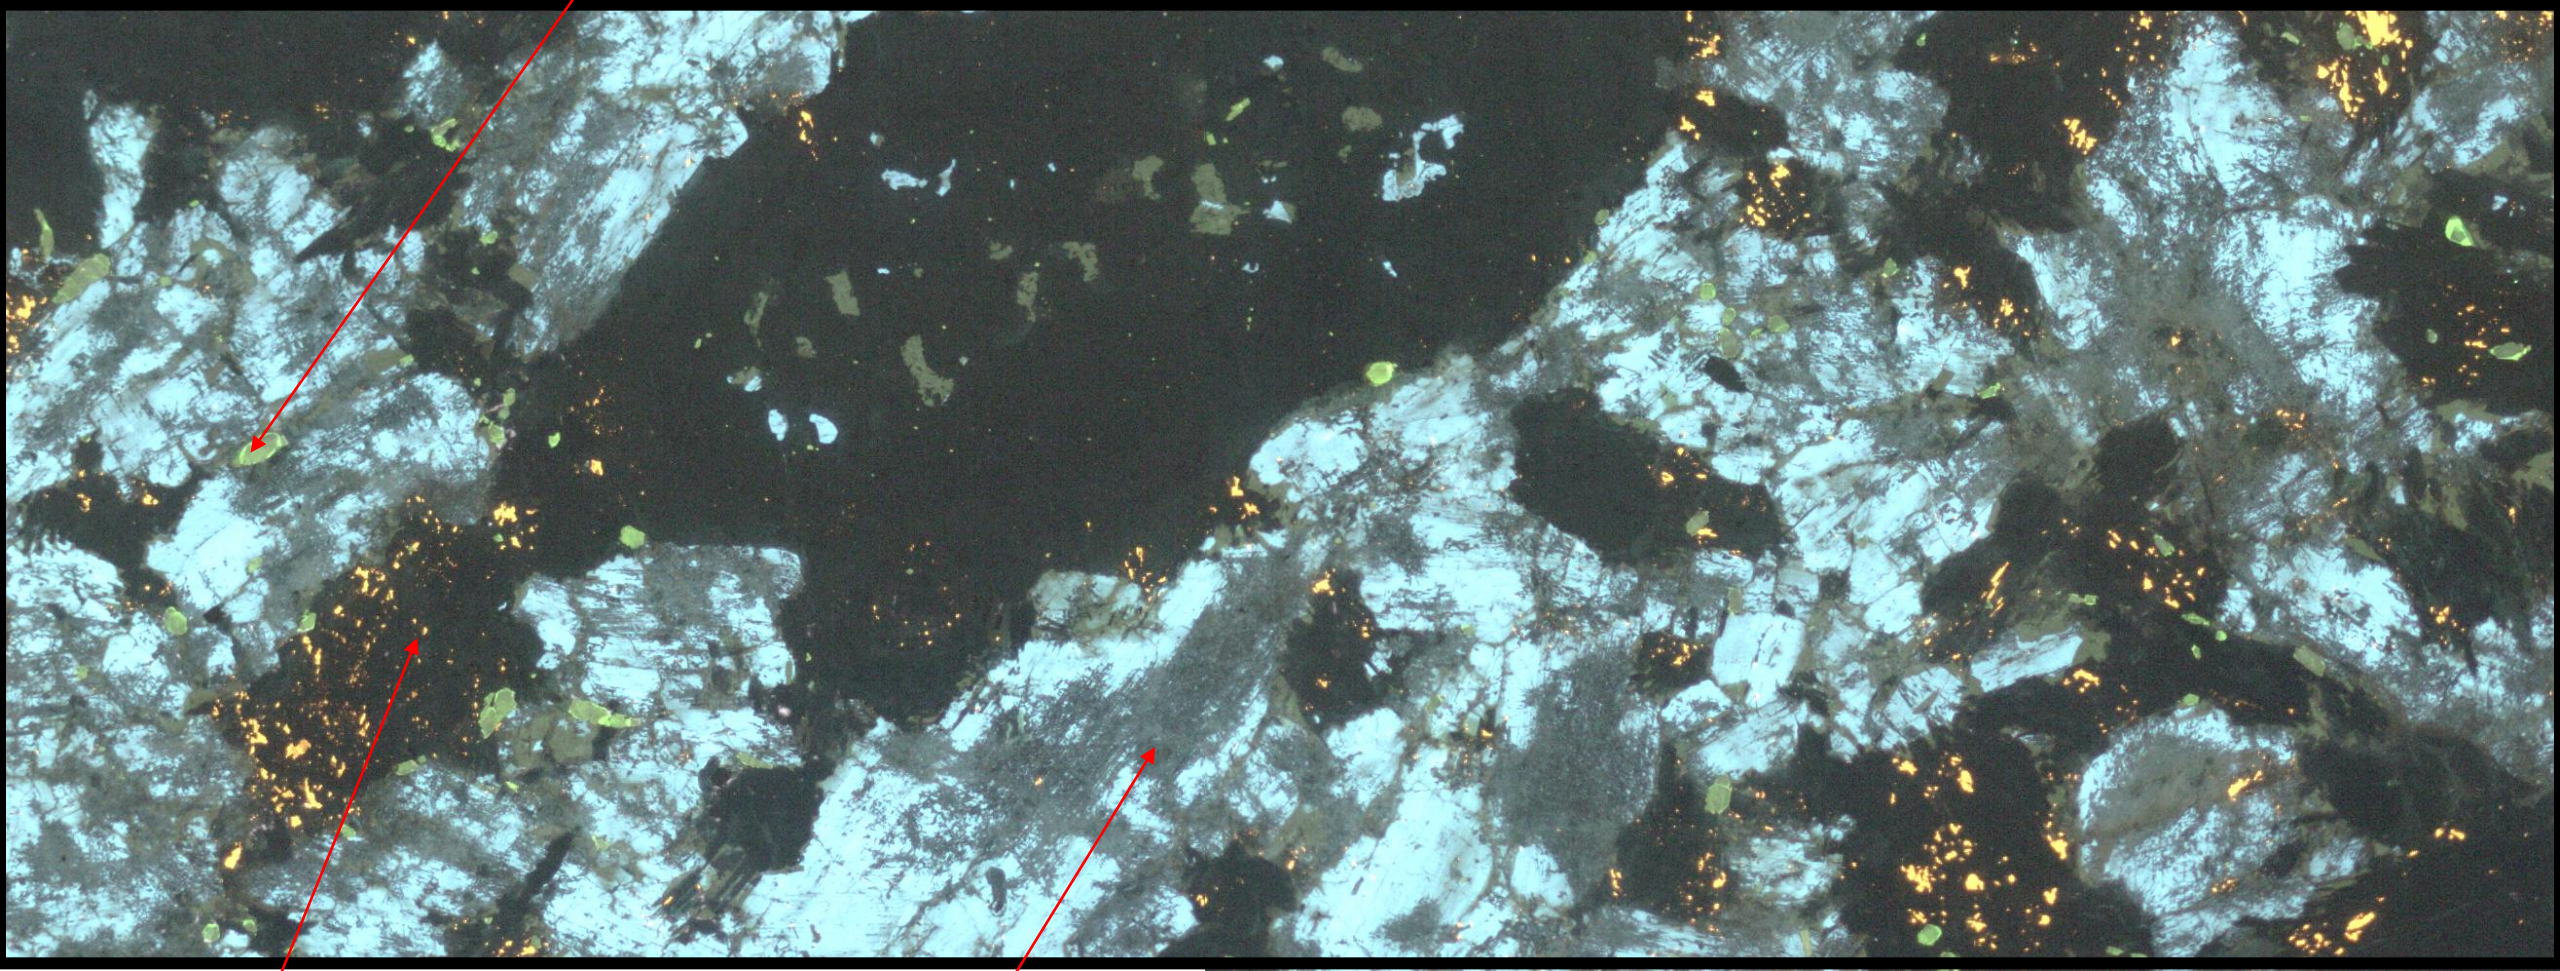

Amphibole (and  
carbonates)

Plagioclase  
(sericitised core)

1 mm

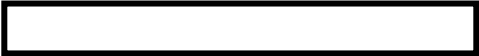



TR28 - andesite

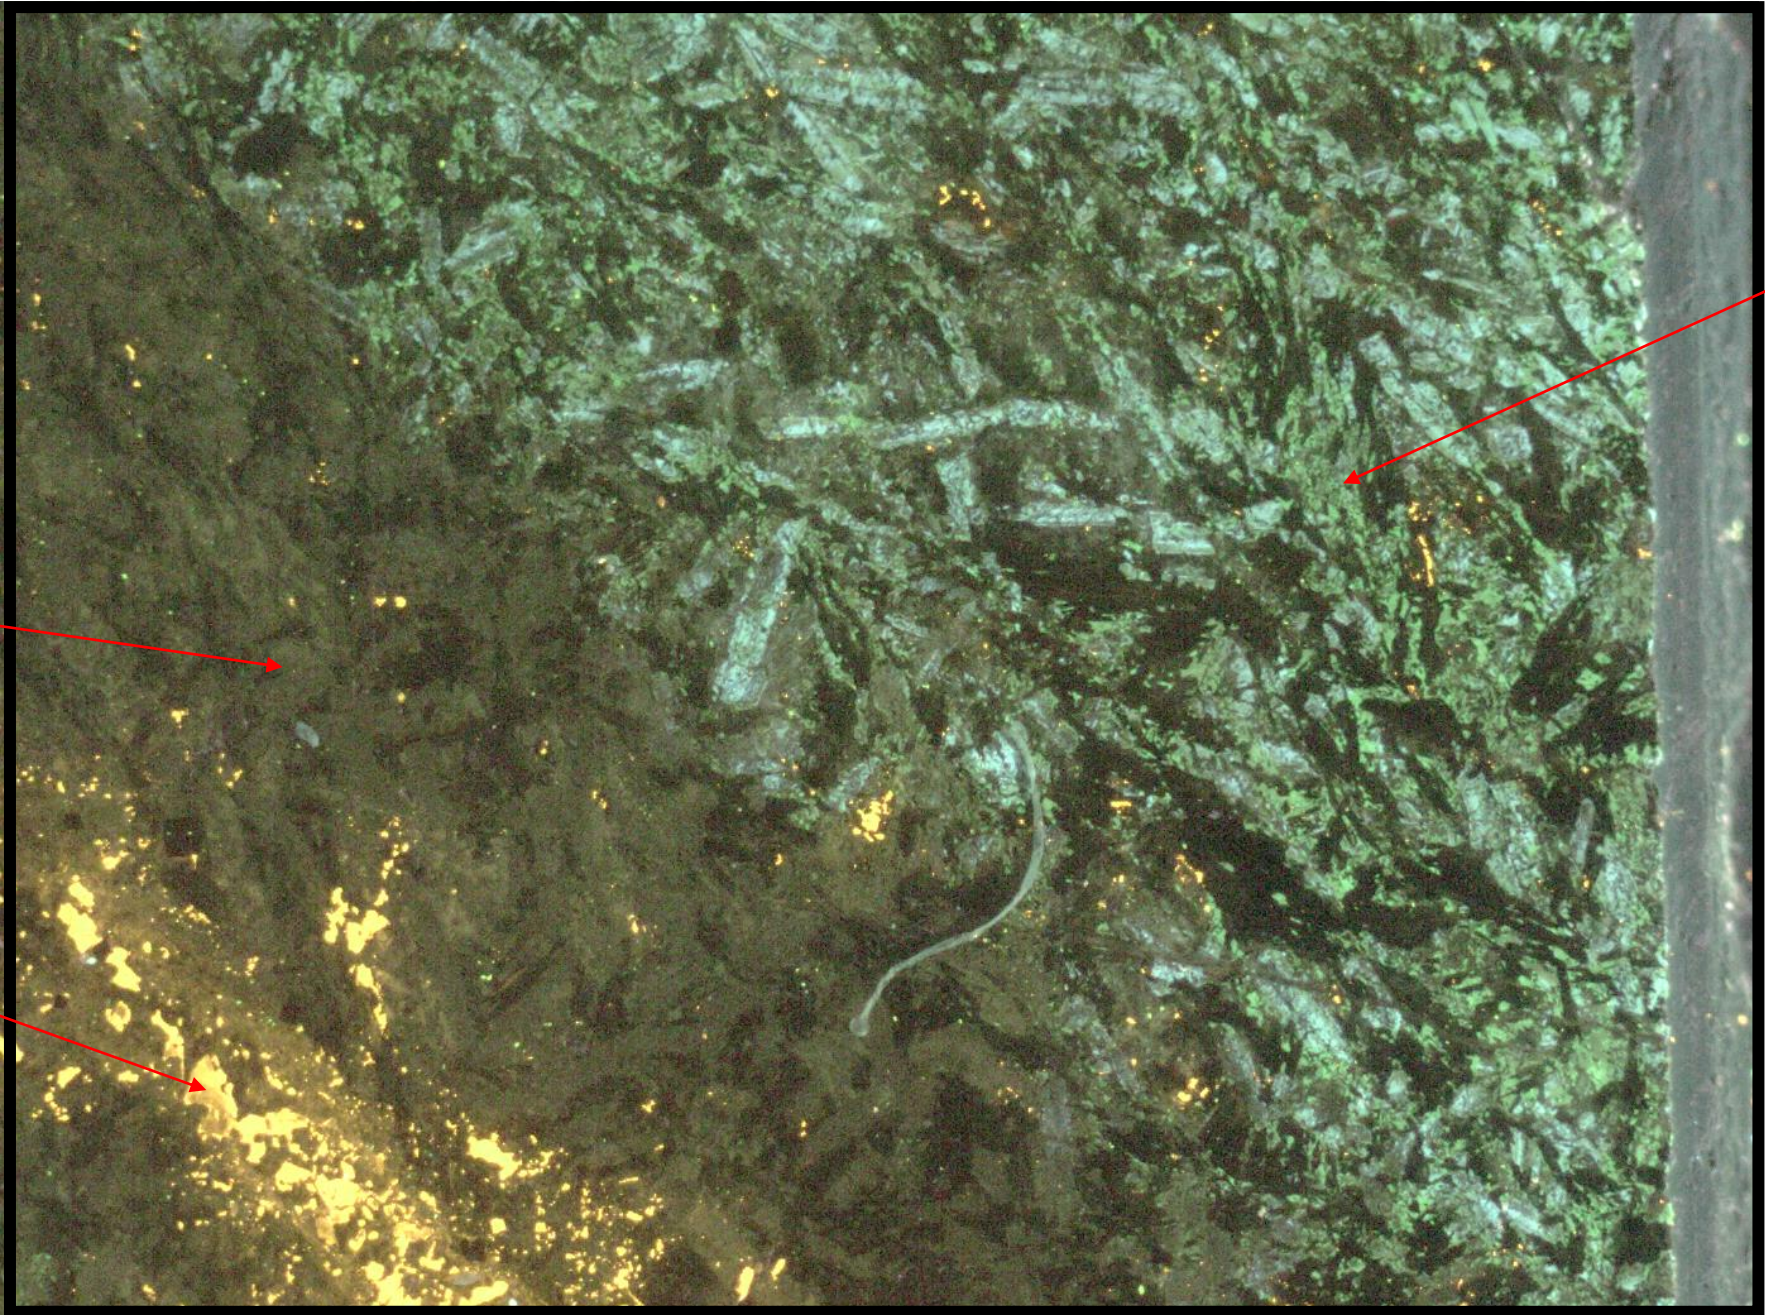

Plagioclase

Albitised  
plagioclase

Carbonate  
vein

1 mm



TR31 - andesite

Albitised  
plagioclase

Carbonate

Chlorite-  
feldspar

Plagioclase

1 mm

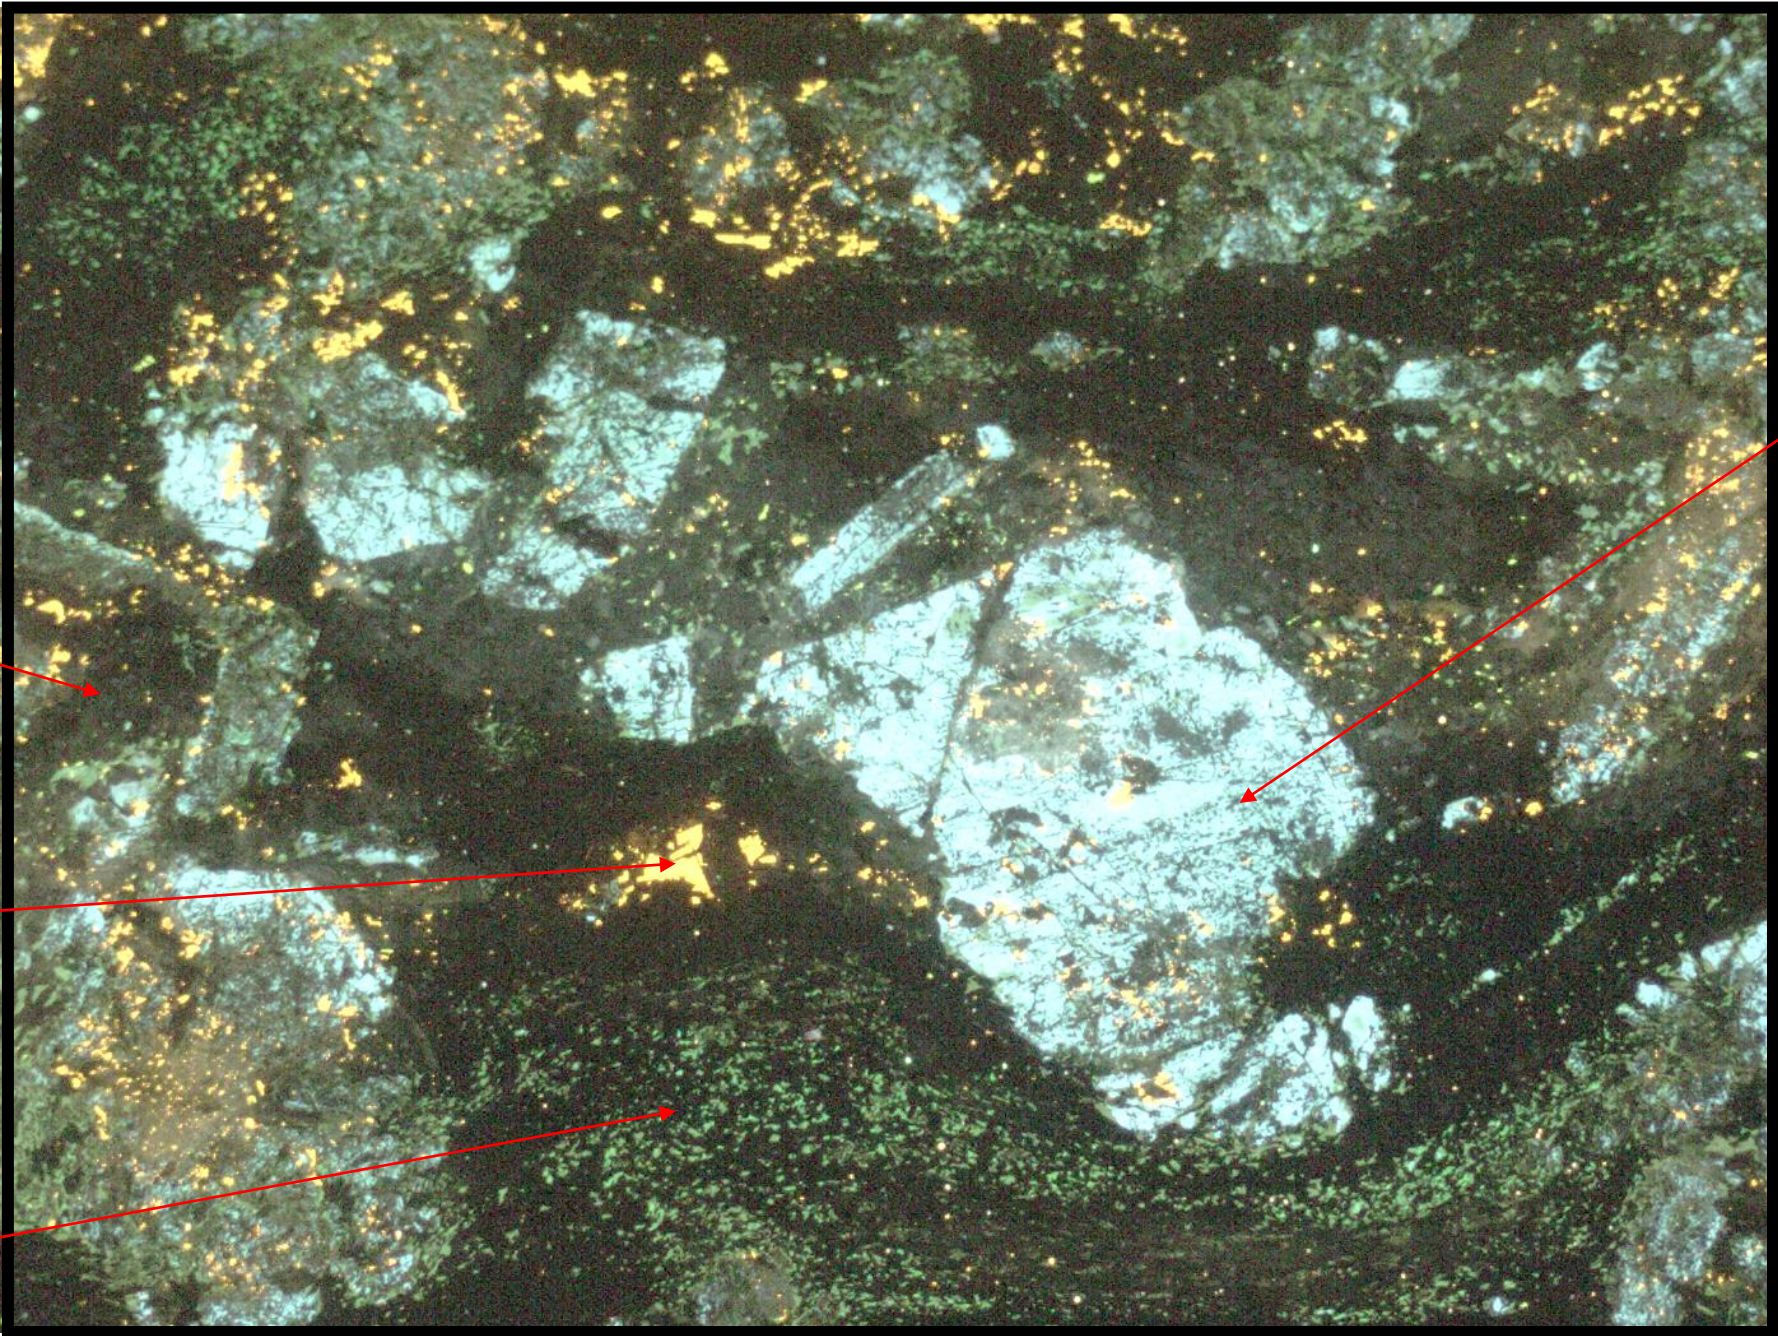

Supplement: s1 [file s1]
